# Supplementary material for: Occurrence of Ordered and Disordered Structural Elements in Postsynaptic Proteins Supports Optimization for Interaction Diversity
Source: Entropy (Basel). 2019 Aug 6;21(8):761. doi: 10.3390/e21080761 (PMC7515291; doi:10.3390/e21080761)
Supplement: Supplementary file 1 [file entropy-21-00761-s001.zip › SupplementaryTable.xlsx]

## Sheet: Description
Stable 1:	Calculated properties and labels of all proteins
Stable 2:	Mean and standard deviation of calculated properties in different groups. Top: sets derived from other sources (i.e. SynaptomeDB, Uniprot etc). Middle: Exclusive human proteome datasets. Bottom: Values calculated by downsampling and bootstrapping default sets 1000 times
Stable 3:	P-values of Kolmogorov Smirnov tests calculated between the proteome and different sets on all features
Stable 4:	Contingency tables and calculated p-values of chi-square tests. The independent observations are: I) PSD/nonPSD II) feature is above/below of the mean calculated on the proteome
Stable 5:	Co-occurence of structral formations in PSD/nonPSD proteins. Means and standard deviations were calculated for selected combinations
Stable 6:	Co-occurence of PPI promoting features in the PSD and proteome proteins. Means and standard deviations were calculated for all combinations
Stable 7:	List of proteins used to train and test the Artifical Neural Network for classification of proteins

## Sheet: Table S1 proteins
	SEQUENCE PROPERTIES														STRUCTURE PROPERTIES																								INTERACTION/FUNCTION PROPERTIES
AC	Length	Hydrophobic	Aromatic	Polar	Positively charged	Negatively charged	Rigid	Flexible	Covalently Interacting	AAIndex: HUTJ700103 (Entropy of formation)	AAIndex: KHAG800101 (The Kerr-constant increments)	AAIndex: JUNJ780101 (Sequence frequency)	AAIndex: NAKH900104 (Normalized composition of mt-proteins)	AAIndex: FAUJ880103 (Normalized van der Waals volume)	Number of Intrinsically Disordered residues (%)	Number of coiled coil residues (%)	Number of collagen residues (%)	Number of single alpha helice residues (%)	Number of Intrinsically Disordered residues	Number of coiled coil residues	Number of collagen residues	Number of single alpha helice residues	Number of Intrinsically Disordered regions (>10 residues)	Number of coiled coils (>10 residues)	Number of collagens (>10 residues)	Number of single alpha helices (>10 residues)	Number of binding regions	Number of binding regions (>10 residue)	Number of transmembrane helices	Transmembrane residues (%)	Cytosolic residues in transmembrane proteins (%)	Number of domains	Number of unique domains	Low complexity regions - window: 12	Low complexity regions - window: 25	Low complexity regions - window: 45	Signal peptide	Linker regions	Number of interactions	Phosphorylation	Ubiquitination	Methylation	Acetylation	ELM instances	ELM prediction	Predicted Serine Phosphorylation	Predicted Threonin Phosphorylation	Predicted Tyrosine Phosphorylation	Number of isoforms
A0A024QZB8	438	0.369863	0.111872	0.214612	0.0799087	0.0684932	0.0502283	0.0821918	0.0228311	206.426	36.3573	484.265	0.278539	3.24105	0	0	0	0	0	0	0	0	0	0	0	0	0	0	11	0.530752	0.995444	0	0	0.111617	0.291572	0.61959	0	9	0	0	0	0	0	0	45	3	0	0	0
A0A024R0T9	101	0.326733	0.0990099	0.277228	0.0792079	0.118812	0.049505	0.049505	0	211.547	27.5921	481.931	0.148416	3.36703	0	0	0	0	0	0	0	0	0	0	0	0	0	0	0	0	0	0	0	0.117647	0.382353	0	1	1	0	0	0	0	0	0	15	0	0	0	0
A0A024R161	153	0.372549	0.0784314	0.130719	0.117647	0.0849673	0.0849673	0.0980392	0.0326797	209.003	40.1693	491.092	-0.0420261	3.1581	0	0	0	0	0	0	0	0	0	0	0	0	1	0	0	0	0	2	2	0.194805	0.435065	0.785714	1	4	0	0	0	0	0	0	30	0	0	0	0
A0A024R1R8	64	0.234375	0.015625	0.140625	0.328125	0.140625	0.03125	0.109375	0	227.493	21.3016	521.172	-0.356406	3.35031	50	0	0	0	32	0	0	0	2	0	0	0	2	2	0	0	0	0	0	0.630769	0.923077	0.923077	0	1	0	0	0	0	0	0	10	1	1	0	0
A0A024R216	203	0.137931	0.08867	0.221675	0.197044	0.182266	0.0591133	0.108374	0.00492611	214.71	30.4222	485.108	-0.242512	3.26616	55.1724	0	0	0	112	0	0	0	1	0	0	0	3	1	0	0	0	1	1	0.196078	0.495098	0.495098	0	3	0	0	0	0	0	0	28	0	0	0	0
A0A024R368	844	0.214455	0.0793839	0.248815	0.159953	0.126777	0.0533175	0.0758294	0.0414692	216.009	35.7565	447.821	-0.0354739	3.38027	48.2227	0	0	0	407	0	0	0	3	0	0	0	10	10	0	0	0	4	2	0.087574	0.114793	0.142012	0	15	0	0	0	0	0	0	87	5	2	1	0
A0A024R4M0	194	0.309278	0.0670103	0.118557	0.257732	0.123711	0.0360825	0.0824742	0.00515464	230.781	40.3794	476.005	-0.109845	3.71005	0	0	0	0	0	0	0	0	0	0	0	0	0	0	0	0	0	1	1	0.0974359	0.117949	0.892308	0	3	0	0	0	0	0	0	39	3	0	0	0
A0A024R6X1	623	0.319422	0.0850722	0.213483	0.11236	0.0979133	0.0786517	0.0802568	0.0128411	209.925	35.4059	461.002	0.0974157	3.3077	0	0	0	0	0	0	0	0	0	0	0	0	3	2	0	0	0	1	1	0	0	0	0	19	0	0	0	0	0	0	77	0	1	0	0
A0A024R7N8	372	0.387097	0.0456989	0.115591	0.13172	0.077957	0.123656	0.0860215	0.0322581	208.433	44.9919	487.672	-0.063629	3.07812	8.33333	0	0	0	31	0	0	0	1	0	0	0	5	3	0	0	0	1	1	0.235925	0.69437	0.863271	1	12	0	0	0	0	0	0	53	0	0	0	0
A0A024RA52	234	0.337607	0.102564	0.192308	0.123932	0.106838	0.042735	0.0854701	0.00854701	211.691	32.2923	480.829	0.0118803	3.31932	0	0	0	0	0	0	0	0	0	0	0	0	0	0	0	0	0	1	1	0	0.0978723	0	0	7	0	0	0	0	0	0	35	0	2	0	0
A0A024RB15	25	0.2	0.04	0.08	0.68	0	0	0	0	286.179	62	420.48	-0.3912	5.0644	0	0	0	0	0	0	0	0	0	0	0	0	1	1	0	0	0	0	0	0.961538	0.961538	0	0	0	0	0	0	0	0	0	2	1	0	0	0
A0A075B6F4	123	0.260163	0.121951	0.227642	0.154472	0.113821	0.0406504	0.0162602	0.0569106	222.616	30.791	439.139	0.0382787	3.68287	0	0	0	0	0	0	0	0	0	0	0	0	0	0	0	0	0	1	1	0	0.201613	0	1	3	0	0	0	0	0	0	0	2	1	0	0
A0A075B6H5	130	0.307692	0.0692308	0.276923	0.123077	0.0769231	0.0538462	0.0692308	0.0230769	212.099	34.31	473.369	0.172923	3.25754	0	0	0	0	0	0	0	0	0	0	0	0	0	0	0	0	0	1	1	0.10687	0.320611	0.381679	1	8	0	0	0	0	0	0	20	2	2	1	0
A0A075B6H7	116	0.293103	0.103448	0.318966	0.0603448	0.0689655	0.0862069	0.0517241	0.0172414	208.528	35.0069	471.043	0.227241	3.27543	0	0	0	0	0	0	0	0	0	0	0	0	0	0	0	0	0	1	1	0.0769231	0	0	1	3	0	0	0	0	0	0	26	0	0	0	0
A0A075B6H8	117	0.307692	0.128205	0.213675	0.102564	0.0854701	0.0683761	0.0769231	0.017094	209.45	34.2932	470.701	0.21359	3.37231	0	0	0	0	0	0	0	0	0	0	0	0	0	0	0	0	0	1	1	0.177966	0	0	1	2	0	0	0	0	0	0	23	0	0	0	0
A0A075B6H9	119	0.268908	0.0840336	0.319328	0.092437	0.0756303	0.0420168	0.092437	0.0252101	204.732	34.3756	484.37	0.207395	3.06597	0	0	0	0	0	0	0	0	0	0	0	0	1	0	0	0	0	1	1	0.133333	0.391667	0.391667	1	6	0	0	0	0	0	0	21	2	1	2	0
A0A075B6I0	122	0.295082	0.0983607	0.327869	0.0327869	0.057377	0.057377	0.114754	0.0163934	198.461	33.6902	486.598	0.209508	2.93582	0	0	0	0	0	0	0	0	0	0	0	0	0	0	0	0	0	1	1	0.186992	0.406504	0.601626	1	1	0	0	0	0	0	0	17	2	0	2	0
A0A075B6I1	120	0.258333	0.1	0.325	0.0833333	0.075	0.05	0.0833333	0.025	204.792	33.305	481.642	0.220583	3.1185	0	0	0	0	0	0	0	0	0	0	0	0	0	0	0	0	0	1	1	0.173554	0.553719	0.380165	1	2	0	0	0	0	0	0	20	0	1	2	0
A0A075B6I3	123	0.284553	0.0813008	0.300813	0.0813008	0.0731707	0.0813008	0.0731707	0.0243902	205.606	32.778	488.959	0.208374	3.09114	0	0	0	0	0	0	0	0	0	0	0	0	1	0	0	0	0	1	1	0.0483871	0.379032	0.379032	1	4	0	0	0	0	0	0	24	1	0	3	0
A0A075B6I4	117	0.307692	0.0512821	0.350427	0.0854701	0.0512821	0.0598291	0.0769231	0.017094	205.481	35.3137	490.35	0.164786	2.98709	0	0	0	0	0	0	0	0	0	0	0	0	1	1	0	0	0	1	1	0.0677966	0.0677966	0	1	3	0	0	0	0	0	0	15	2	0	2	1
A0A075B6I6	118	0.288136	0.0847458	0.330508	0.059322	0.0508475	0.059322	0.101695	0.0254237	199.615	34.2051	492.178	0.137881	2.90246	0	0	0	0	0	0	0	0	0	0	0	0	0	0	0	0	0	1	1	0	0	0.521008	1	2	0	0	0	0	0	0	9	2	0	2	0
A0A075B6I7	105	0.27619	0.104762	0.314286	0.0952381	0.0285714	0.0666667	0.0952381	0.0190476	205.232	37.719	490.19	0.249238	3.10333	0	0	0	0	0	0	0	0	0	0	0	0	0	0	0	0	0	1	1	0	0.433962	0.679245	1	4	0	0	0	0	0	0	23	0	0	0	0
A0A075B6I9	117	0.264957	0.111111	0.290598	0.0683761	0.0512821	0.0769231	0.102564	0.034188	202.278	35.2624	484.769	0.175726	3.05256	0	0	0	0	0	0	0	0	0	0	0	0	0	0	0	0	0	1	1	0.110169	0.305085	0.584746	1	7	0	0	0	0	0	0	18	1	0	2	0
A0A075B6J1	123	0.260163	0.105691	0.308943	0.0569106	0.0731707	0.0894309	0.0813008	0.0243902	203.003	31.8	476.496	0.208618	3.10659	0	0	0	0	0	0	0	0	0	0	0	0	0	0	0	0	0	1	1	0.112903	0.33871	0.33871	1	6	0	0	0	0	0	0	32	1	0	2	0
A0A075B6J2	118	0.279661	0.110169	0.355932	0.0677966	0.0508475	0.0338983	0.0847458	0.0169492	203.635	34.0695	487.161	0.273051	3.09551	0	0	0	0	0	0	0	0	0	0	0	0	0	0	0	0	0	1	1	0.0672269	0.277311	0.386555	1	3	0	0	0	0	0	0	16	2	0	1	0
A0A075B6J6	115	0.269565	0.0956522	0.286957	0.0434783	0.13913	0.0695652	0.0782609	0.0173913	205.186	30.167	478.104	0.0861739	3.14417	0	0	0	0	0	0	0	0	0	0	0	0	1	1	0	0	0	1	1	0.189655	0	0	1	4	0	0	0	0	0	0	29	1	0	2	0
A0A075B6J9	118	0.254237	0.0932203	0.372881	0.0423729	0.059322	0.0677966	0.0932203	0.0169492	199.712	34.4966	491.203	0.163983	2.9289	0	0	0	0	0	0	0	0	0	0	0	0	1	1	0	0	0	1	1	0.193277	0.394958	0.394958	1	3	0	0	0	0	0	0	20	0	1	3	0
A0A075B6K0	115	0.295652	0.104348	0.26087	0.0608696	0.0956522	0.0782609	0.0782609	0.026087	205.478	31.1948	480.339	0.130087	3.1607	0	0	0	0	0	0	0	0	0	0	0	0	0	0	0	0	0	1	1	0.0775862	0	0	1	4	0	0	0	0	0	0	21	2	1	3	0
A0A075B6K2	115	0.278261	0.0782609	0.304348	0.0869565	0.0869565	0.0608696	0.0782609	0.026087	204.315	34.3983	467.183	0.0745217	3.06104	0	0	0	0	0	0	0	0	0	0	0	0	1	1	0	0	0	1	1	0	0	0	1	7	0	0	0	0	0	0	23	2	0	2	0
A0A075B6K4	115	0.26087	0.104348	0.295652	0.0695652	0.0956522	0.0782609	0.0695652	0.026087	204.356	31.8765	476.383	0.0715652	3.11209	0	0	0	0	0	0	0	0	0	0	0	0	1	0	0	0	0	1	1	0.0775862	0	0	1	5	0	0	0	0	0	0	22	2	0	3	0
A0A075B6K5	115	0.304348	0.0869565	0.313043	0.0869565	0.0608696	0.0434783	0.0869565	0.0173913	204.775	36.087	482.078	0.0906957	3.06122	0	0	0	0	0	0	0	0	0	0	0	0	1	0	0	0	0	1	1	0	0	0	1	6	0	0	0	0	0	0	21	0	0	2	0
A0A075B6K6	122	0.254098	0.106557	0.270492	0.0983607	0.0983607	0.057377	0.0901639	0.0245902	205.642	34.4033	466.697	0.145	3.17951	0	0	0	0	0	0	0	0	0	0	0	0	1	0	0	0	0	1	1	0	0	0	1	9	0	0	0	0	0	0	17	1	0	1	0
A0A075B6L2	103	0.271845	0.0970874	0.242718	0.194175	0.0873786	0.0291262	0.0485437	0.0291262	219.884	30.299	459.602	0.109223	3.54495	0	0	0	0	0	0	0	0	0	0	0	0	0	0	0	0	0	1	1	0	0	0	0	1	0	0	0	0	0	0	12	0	0	0	0
A0A075B6L6	115	0.286957	0.0869565	0.217391	0.121739	0.104348	0.0434783	0.113043	0.026087	208.276	37.0722	490.504	0.00269565	3.12009	0	0	0	0	0	0	0	0	0	0	0	0	0	0	0	0	0	1	1	0.0862069	0	0	1	6	0	0	0	0	0	0	16	2	0	0	1
A0A075B6M9	112	0.258929	0.107143	0.241071	0.142857	0.0535714	0.0535714	0.0714286	0.0625	215.939	29.0595	448.189	0.155586	3.45883	0	0	0	0	0	0	0	0	0	0	0	0	0	0	0	0	0	1	1	0	0	0	1	3	0	0	0	0	0	0	0	2	0	0	0
A0A075B6N1	114	0.280702	0.105263	0.280702	0.0964912	0.0877193	0.0350877	0.0701754	0.0438596	212.854	27.9307	461.167	0.0772807	3.34404	0	0	0	0	0	0	0	0	0	0	0	0	0	0	0	0	0	1	1	0.0869565	0	0	1	4	0	0	0	0	0	0	14	0	0	0	1
A0A075B6N2	111	0.324324	0.0810811	0.279279	0.117117	0.0720721	0.036036	0.0630631	0.027027	211.061	32.6649	477.477	0.24	3.25441	0	0	0	0	0	0	0	0	0	0	0	0	0	0	0	0	0	1	1	0.223214	0.125	0	1	3	0	0	0	0	0	0	16	1	0	1	1
A0A075B6N3	115	0.286957	0.121739	0.252174	0.113043	0.0956522	0.026087	0.0782609	0.026087	212.418	31.8252	463.922	0.159826	3.38626	0	0	0	0	0	0	0	0	0	0	0	0	0	0	0	0	0	1	1	0	0	0	1	2	0	0	0	0	0	0	11	1	0	0	1
A0A075B6N4	114	0.27193	0.114035	0.245614	0.122807	0.105263	0.0350877	0.0789474	0.0263158	213.231	31.7798	448.36	0.211579	3.46132	0	0	0	0	0	0	0	0	0	0	0	0	1	0	0	0	0	1	1	0	0	0	1	4	0	0	0	0	0	0	15	2	0	0	1
A0A075B6P5	120	0.308333	0.0833333	0.283333	0.0666667	0.0666667	0.075	0.1	0.0166667	205.266	34.0325	478.4	0.213167	3.13467	0	0	0	0	0	0	0	0	0	0	0	0	0	0	0	0	0	1	1	0	0	0	0	2	0	0	0	0	0	0	21	1	1	0	0
A0A075B6Q4	140	0.221429	0.0928571	0.228571	0.121429	0.278571	0.00714286	0.0428571	0.00714286	215.423	25.3964	449.436	-0.158286	3.48736	27.8571	0	0	0	39	0	0	0	1	0	0	0	2	1	0	0	0	0	0	0.0992908	0.283688	0	0	0	0	0	0	0	0	0	12	2	0	2	0
A0A075B6Q5	118	0.322034	0.127119	0.228814	0.0932203	0.0762712	0.0169492	0.110169	0.0254237	205.874	35.4424	481.847	0.0968644	3.20517	0	0	0	0	0	0	0	0	0	0	0	0	0	0	0	0	0	1	1	0	0.252101	0	1	5	0	0	0	0	0	0	15	1	0	0	0
A0A075B6Q9	173	0.294798	0.0867052	0.236994	0.144509	0.115607	0.0462428	0.0289017	0.0404624	220.162	23.8087	453.663	0.175174	3.53988	0	0	0	0	0	0	0	0	0	0	0	0	0	0	1	0.132184	0.988506	1	1	0	0.114943	0	0	6	0	0	0	0	0	0	22	0	1	0	0
A0A075B6R0	118	0.288136	0.127119	0.271186	0.110169	0.0847458	0.0254237	0.0762712	0.0169492	212.573	31.8992	473.297	0.110339	3.40398	0	0	0	0	0	0	0	0	0	0	0	0	0	0	0	0	0	1	1	0.10084	0	0	1	4	0	0	0	0	0	0	15	0	1	1	0
A0A075B6R2	117	0.299145	0.111111	0.290598	0.111111	0.042735	0.0512821	0.0769231	0.017094	209.381	35.5026	483.778	0.165897	3.28479	0	0	0	0	0	0	0	0	0	0	0	0	0	0	0	0	0	1	1	0.110169	0.372881	0	1	5	0	0	0	0	0	0	20	1	0	0	0
A0A075B6R6	189	0.280423	0.0952381	0.248677	0.137566	0.126984	0.047619	0.026455	0.031746	219.452	23.509	453.394	0.157819	3.5475	0	0	0	0	0	0	0	0	0	0	0	0	0	0	1	0.121053	0.989474	1	1	0.0789474	0.231579	0	0	9	0	0	0	0	0	0	23	2	2	1	0
A0A075B6R9	120	0.3	0.0916667	0.291667	0.0833333	0.0583333	0.075	0.0916667	0.00833333	207.866	37.485	476.117	0.180583	3.21758	0	0	0	0	0	0	0	0	0	0	0	0	0	0	0	0	0	1	1	0.0909091	0	0	1	4	0	0	0	0	0	0	23	1	2	0	0
A0A075B6S0	17	0.235294	0.176471	0.294118	0.117647	0	0	0.117647	0	212.433	25.4937	511.188	0.3175	3.42	0	0	0	0	0	0	0	0	0	0	0	0	0	0	0	0	0	0	0	0	0	0	0	0	0	0	0	0	0	0	7	1	2	0	0
A0A075B6S1	179	0.307263	0.100559	0.234637	0.122905	0.106145	0.0502793	0.0502793	0.0223464	213.354	33.7191	468.607	-0.00719101	3.38691	0	0	0	0	0	0	0	0	0	0	0	0	0	0	1	0.122222	0.988889	1	1	0.0944444	0	0	0	9	0	0	0	0	0	0	13	1	1	0	0
A0A075B6S2	120	0.308333	0.0916667	0.275	0.075	0.0666667	0.0833333	0.0833333	0.0166667	207.933	32.5592	469.742	0.231083	3.25192	0	0	0	0	0	0	0	0	0	0	0	0	0	0	0	0	0	1	1	0	0	0	1	7	0	0	0	0	0	0	23	1	0	0	0
A0A075B6S4	117	0.299145	0.102564	0.290598	0.0940171	0.042735	0.0683761	0.0769231	0.025641	208.059	36.2923	464.111	0.196154	3.24479	0	0	0	0	0	0	0	0	0	0	0	0	0	0	0	0	0	1	1	0.059322	0	0	1	3	0	0	0	0	0	0	15	0	0	0	0
A0A075B6S5	117	0.307692	0.0854701	0.307692	0.0769231	0.0598291	0.0683761	0.0683761	0.025641	208.196	32.888	476.128	0.168803	3.17726	0	0	0	0	0	0	0	0	0	0	0	0	0	0	0	0	0	1	1	0.0762712	0	0	1	2	0	0	0	0	0	0	18	0	1	1	0
A0A075B6S6	120	0.275	0.1	0.283333	0.0833333	0.0666667	0.075	0.1	0.0166667	207.657	37.01	465.183	0.141667	3.25833	0	0	0	0	0	0	0	0	0	0	0	0	0	0	0	0	0	1	1	0	0.264463	0.429752	1	7	0	0	0	0	0	0	16	1	0	0	0
A0A075B6S9	117	0.299145	0.0854701	0.307692	0.0854701	0.0512821	0.0683761	0.0854701	0.017094	208.77	35.7855	482.564	0.152479	3.17598	0	0	0	0	0	0	0	0	0	0	0	0	0	0	0	0	0	1	1	0.059322	0	0	1	2	0	0	0	0	0	0	18	0	0	0	0
A0A075B6T3	26	0.269231	0.0769231	0.230769	0.115385	0.115385	0.0769231	0.0384615	0.0384615	221.924	33.98	469.16	0.078	3.6036	0	0	0	0	0	0	0	0	0	0	0	0	0	0	0	0	0	0	0	0	0	0	0	0	0	0	0	0	0	0	4	3	1	0	0
A0A075B6T6	113	0.292035	0.123894	0.300885	0.0884956	0.0884956	0.0353982	0.0530973	0.0176991	213.029	31.4195	465.389	0.140796	3.45929	0	0	0	0	0	0	0	0	0	0	0	0	0	0	0	0	0	1	1	0.175439	0.175439	0	1	4	0	0	0	0	0	0	22	2	0	0	0
A0A075B6T7	132	0.30303	0.113636	0.227273	0.151515	0.0984848	0.0378788	0.0530303	0.0151515	221.024	33.6523	459.061	0.169697	3.66917	0	0	0	0	0	0	0	0	0	0	0	0	0	0	0	0	0	1	1	0.12782	0.218045	0	0	5	0	0	0	0	0	0	23	3	3	0	0
A0A075B6T8	112	0.267857	0.116071	0.25	0.0892857	0.116071	0.0535714	0.0892857	0.0178571	206.008	29.3679	467.777	0.0797321	3.2333	0	0	0	0	0	0	0	0	0	0	0	0	1	0	0	0	0	1	1	0	0	0	1	5	0	0	0	0	0	0	15	2	0	0	0
A0A075B6U4	112	0.285714	0.107143	0.258929	0.116071	0.0714286	0.0446429	0.0803571	0.0357143	211.615	31.6884	451.786	0.146071	3.37527	0	0	0	0	0	0	0	0	0	0	0	0	0	0	0	0	0	1	1	0	0	0	1	4	0	0	0	0	0	0	15	0	0	1	0
A0A075B6U6	113	0.318584	0.123894	0.247788	0.115044	0.0973451	0.0265487	0.0530973	0.0176991	214.085	29.5965	479.398	0.179912	3.45761	0	0	0	0	0	0	0	0	0	0	0	0	0	0	0	0	0	1	1	0.0964912	0.236842	0	1	1	0	0	0	0	0	0	18	1	0	0	0
A0A075B6U7	21	0.238095	0.0952381	0.238095	0.0952381	0.047619	0.047619	0.190476	0	207.345	28.36	498.75	0.167	3.1225	0	0	0	0	0	0	0	0	0	0	0	0	0	0	0	0	0	0	0	0	0	0	0	0	0	0	0	0	0	0	1	1	0	0	0
A0A075B6U8	20	0.3	0.1	0.2	0.15	0.05	0.05	0.1	0	216.597	39.9947	484.474	0.332105	3.45895	0	0	0	0	0	0	0	0	0	0	0	0	0	0	0	0	0	0	0	0	0	0	0	0	0	0	0	0	0	0	6	2	0	0	0
A0A075B6U9	22	0.227273	0.0909091	0.272727	0.136364	0.0454545	0	0.181818	0	204.959	33.8143	495.476	0.34	2.98619	0	0	0	0	0	0	0	0	0	0	0	0	0	0	0	0	0	0	0	0	0	0	0	0	0	0	0	0	0	0	1	0	3	0	0
A0A075B6V0	20	0.35	0.1	0.15	0.15	0.1	0	0.1	0	216.115	32.3579	496.947	0.250526	3.45211	0	0	0	0	0	0	0	0	0	0	0	0	0	0	0	0	0	0	0	0	0	0	0	0	0	0	0	0	0	0	3	1	1	0	0
A0A075B6V1	18	0.222222	0.0555556	0.277778	0.166667	0.0555556	0.0555556	0.111111	0	214.708	37.9941	467.294	0.0694118	3.22941	0	0	0	0	0	0	0	0	0	0	0	0	1	1	0	0	0	0	0	0	0	0	0	1	0	0	0	0	0	0	1	0	2	0	0
A0A075B6V2	18	0.111111	0.277778	0.277778	0.166667	0	0.0555556	0.111111	0	214.061	24.8222	467	0.288333	3.76056	0	0	0	0	0	0	0	0	0	0	0	0	0	0	0	0	0	0	0	0	0	0	0	1	0	0	0	0	0	0	2	1	1	0	0
A0A075B6V3	21	0.190476	0.0952381	0.333333	0.0952381	0.047619	0.047619	0.142857	0	209.091	35.51	488.7	0.4305	3.154	0	0	0	0	0	0	0	0	0	0	0	0	0	0	0	0	0	0	0	0	0	0	0	0	0	0	0	0	0	0	3	0	3	0	0
A0A075B6V5	113	0.353982	0.0973451	0.256637	0.106195	0.0973451	0.0265487	0.0353982	0.0265487	215.004	27.3	476.602	0.26469	3.44354	0	0	0	0	0	0	0	0	0	0	0	0	0	0	0	0	0	1	1	0	0	0	1	2	0	0	0	0	0	0	11	1	1	0	0
A0A075B6V6	18	0.333333	0.111111	0.222222	0.0555556	0.0555556	0.0555556	0.111111	0	208.441	31.1	492.294	0.327647	3.30294	0	0	0	0	0	0	0	0	0	0	0	0	0	0	0	0	0	0	0	0	0	0	0	0	0	0	0	0	0	0	1	0	0	0	0
A0A075B6V7	20	0.2	0.15	0.25	0.05	0.05	0.1	0.15	0	201.531	36.9579	473.211	0.155789	3.19211	0	0	0	0	0	0	0	0	0	0	0	0	0	0	0	0	0	0	0	0	0	0	0	0	0	0	0	0	0	0	3	1	0	1	0
A0A075B6V8	20	0.2	0.05	0.3	0.15	0.05	0.05	0.15	0	214.491	51.5	496.053	-0.0752632	3.10947	0	0	0	0	0	0	0	0	0	0	0	0	1	1	0	0	0	0	0	0	0	0	0	0	0	0	0	0	0	0	3	1	3	0	0
A0A075B6V9	18	0.166667	0.111111	0.222222	0.222222	0.0555556	0	0.166667	0	221.891	41.9647	470.353	-0.100588	3.52294	0	0	0	0	0	0	0	0	0	0	0	0	1	1	0	0	0	0	0	0	0	0	0	3	0	0	0	0	0	0	2	0	2	0	0
A0A075B6W1	20	0.2	0.2	0.2	0.1	0.1	0.05	0.1	0	212.812	38.8316	427.263	0.283684	3.79526	0	0	0	0	0	0	0	0	0	0	0	0	0	0	0	0	0	0	0	0	0	0	0	0	0	0	0	0	0	0	2	0	0	0	0
A0A075B6W2	23	0.217391	0.0869565	0.304348	0.0869565	0	0.0434783	0.217391	0	195.306	36.85	512.864	0.259091	2.70045	0	0	0	0	0	0	0	0	0	0	0	0	0	0	0	0	0	0	0	0	0	0	0	0	0	0	0	0	0	0	4	0	3	1	0
A0A075B6W3	19	0.315789	0.105263	0.210526	0.105263	0.0526316	0.0526316	0.105263	0	213.308	26.2389	474.611	0.315	3.42722	0	0	0	0	0	0	0	0	0	0	0	0	0	0	0	0	0	0	0	0	0	0	0	0	0	0	0	0	0	0	5	1	1	0	0
A0A075B6W4	21	0.190476	0.047619	0.238095	0.238095	0.047619	0.047619	0.142857	0	216.936	42.495	536.75	-0.055	3.048	0	0	0	0	0	0	0	0	0	0	0	0	1	1	0	0	0	0	0	0	0	0	0	0	0	0	0	0	0	0	1	2	0	0	0
A0A075B6W5	121	0.272727	0.123967	0.272727	0.107438	0.0826446	0.0495868	0.0661157	0.0247934	211.141	30.0174	460.008	0.0750413	3.37628	0	0	0	0	0	0	0	0	0	0	0	0	0	0	0	0	0	1	1	0	0.270492	0	1	4	0	0	0	0	0	0	21	2	0	0	0
A0A075B6W6	20	0.15	0.05	0.4	0.1	0.05	0.05	0.15	0	198.805	30.4579	526.105	0.112105	2.60158	0	0	0	0	0	0	0	0	0	0	0	0	1	0	0	0	0	0	0	0	0	0	0	0	0	0	0	0	0	0	3	1	3	0	0
A0A075B6W7	21	0.333333	0.047619	0.285714	0.0952381	0	0.047619	0.142857	0	204.997	34.775	513.7	0.2705	2.935	0	0	0	0	0	0	0	0	0	0	0	0	0	0	0	0	0	0	0	0	0	0	0	0	0	0	0	0	0	0	2	1	1	0	0
A0A075B6W8	21	0.333333	0.047619	0.142857	0.190476	0	0.047619	0.190476	0	208.992	37.78	550.65	0.027	2.86	0	0	0	0	0	0	0	0	0	0	0	0	0	0	0	0	0	0	0	0	0	0	0	0	0	0	0	0	0	0	2	0	1	0	0
A0A075B6W9	22	0.181818	0.0909091	0.363636	0.0909091	0	0.0454545	0.181818	0	200.955	28.7714	527.714	0.343333	2.8319	0	0	0	0	0	0	0	0	0	0	0	0	1	0	0	0	0	0	0	0	0	0	0	0	0	0	0	0	0	0	1	0	3	0	0
A0A075B6X0	22	0.227273	0.0909091	0.181818	0.0909091	0.0454545	0.0454545	0.272727	0	191.698	38.3952	516.857	0.204762	2.62095	0	0	0	0	0	0	0	0	0	0	0	0	0	0	0	0	0	0	0	0	0	0	0	0	0	0	0	0	0	0	1	1	1	0	0
A0A075B6X3	22	0.318182	0.0909091	0.272727	0.0454545	0	0.0454545	0.181818	0	197.189	31.2429	523.857	0.318571	2.78571	0	0	0	0	0	0	0	0	0	0	0	0	0	0	0	0	0	0	0	0	0	0	0	1	0	0	0	0	0	0	3	0	3	0	0
A0A075B6X4	22	0.227273	0.136364	0.272727	0.0909091	0	0.0454545	0.181818	0	199.263	33.3714	528.429	0.212857	2.90667	0	0	0	0	0	0	0	0	0	0	0	0	0	0	0	0	0	0	0	0	0	0	0	1	0	0	0	0	0	0	1	1	2	0	0
A0A075B6X5	111	0.279279	0.108108	0.315315	0.0900901	0.0990991	0.045045	0.036036	0.027027	212.361	31.4198	475.865	0.169009	3.34946	0	0	0	0	0	0	0	0	0	0	0	0	0	0	0	0	0	1	1	0	0	0	1	5	0	0	0	0	0	0	26	1	0	0	0
A0A075B6X7	20	0.25	0.1	0.25	0.1	0.05	0.1	0.1	0	204.899	30.4789	501.316	0.189474	3.05895	0	0	0	0	0	0	0	0	0	0	0	0	0	0	0	0	0	0	0	0	0	0	0	0	0	0	0	0	0	0	7	1	1	1	0
A0A075B6X8	21	0.238095	0.047619	0.428571	0.0952381	0	0	0.142857	0	207.05	37.685	530.25	0.32	2.8445	0	0	0	0	0	0	0	0	0	0	0	0	0	0	0	0	0	0	0	0	0	0	0	0	0	0	0	0	0	0	3	1	2	0	0
A0A075B6X9	22	0.181818	0.136364	0.227273	0.136364	0.0454545	0.0454545	0.181818	0	214.85	50.481	481.238	0.137143	3.46095	0	0	0	0	0	0	0	0	0	0	0	0	0	0	0	0	0	0	0	0	0	0	0	1	0	0	0	0	0	0	3	1	3	0	0
A0A075B6Y0	19	0.157895	0.157895	0.421053	0	0	0.0526316	0.157895	0	195.774	32.9	476.278	0.430556	2.99	0	0	0	0	0	0	0	0	0	0	0	0	0	0	0	0	0	0	0	0	0	0	0	0	0	0	0	0	0	0	3	1	2	0	0
A0A075B6Y1	19	0.263158	0.0526316	0.105263	0.263158	0.105263	0.0526316	0.105263	0	229.65	38.0389	454.611	0.162222	3.67667	0	0	0	0	0	0	0	0	0	0	0	0	0	0	0	0	0	0	0	0	0	0	0	0	0	0	0	0	0	0	1	0	0	0	0
A0A075B6Y2	20	0.35	0.05	0.2	0.05	0	0.05	0.2	0.05	196.615	35.8895	489.211	0.257895	2.72632	0	0	0	0	0	0	0	0	0	0	0	0	0	0	0	0	0	0	0	0	0	0	0	0	0	0	0	0	0	0	2	1	1	0	0
A0A075B6Y3	21	0.238095	0.0952381	0.285714	0.142857	0	0.047619	0.142857	0	207.118	46.635	516.2	0.25	2.9855	0	0	0	0	0	0	0	0	0	0	0	0	0	0	0	0	0	0	0	0	0	0	0	0	0	0	0	0	0	0	1	3	0	1	0
A0A075B6Y4	20	0.05	0.25	0.3	0.2	0	0.05	0.1	0	217.752	36.5526	431.211	0.140526	3.85842	0	0	0	0	0	0	0	0	0	0	0	0	0	0	0	0	0	0	0	0	0	0	0	0	0	0	0	0	0	0	3	1	1	0	0
A0A075B6Y5	19	0.315789	0.105263	0.157895	0.157895	0.0526316	0	0.157895	0	213.21	33.9722	527.889	0.0755556	3.22	0	0	0	0	0	0	0	0	0	0	0	0	0	0	0	0	0	0	0	0	0	0	0	0	0	0	0	0	0	0	3	1	1	1	0
A0A075B6Y8	20	0.25	0.1	0.35	0.05	0	0.05	0.15	0	197.506	31.4737	512.158	0.522632	2.88579	0	0	0	0	0	0	0	0	0	0	0	0	0	0	0	0	0	0	0	0	0	0	0	0	0	0	0	0	0	0	4	2	2	1	0
A0A075B6Y9	22	0.181818	0.0909091	0.272727	0.136364	0	0.0454545	0.227273	0	203.111	30.1762	529.19	0.152381	2.85905	0	0	0	0	0	0	0	0	0	0	0	0	0	0	0	0	0	0	0	0	0	0	0	1	0	0	0	0	0	0	1	2	1	0	0
A0A075B6Z0	21	0.238095	0.047619	0.428571	0.047619	0	0.047619	0.142857	0	197.643	43.065	531.05	0.243	2.642	0	0	0	0	0	0	0	0	0	0	0	0	0	0	0	0	0	0	0	0	0	0	0	0	0	0	0	0	0	0	4	3	1	0	0
A0A075B6Z1	19	0.263158	0.105263	0.315789	0.105263	0.0526316	0	0.105263	0	203.092	37.1056	526.444	0.00444444	2.88833	0	0	0	0	0	0	0	0	0	0	0	0	0	0	0	0	0	0	0	0	0	0	0	0	0	0	0	0	0	0	4	1	1	0	0
A0A075B6Z2	21	0.238095	0.0952381	0.285714	0.142857	0	0.047619	0.142857	0	208.631	36.61	523.05	0.232	3.035	0	0	0	0	0	0	0	0	0	0	0	0	0	0	0	0	0	0	0	0	0	0	0	0	0	0	0	0	0	0	3	1	3	0	0
A0A075B6Z3	21	0.238095	0.0952381	0.238095	0.0952381	0	0.0952381	0.190476	0	194.167	46.83	502.9	0.24	2.7295	0	0	0	0	0	0	0	0	0	0	0	0	0	0	0	0	0	0	0	0	0	0	0	1	0	0	0	0	0	0	4	2	2	0	0
A0A075B6Z4	16	0.25	0.125	0.1875	0.125	0.0625	0.0625	0.125	0	221.099	34.0867	465.6	0.110667	3.684	0	0	0	0	0	0	0	0	0	0	0	0	0	0	0	0	0	0	0	0	0	0	0	0	0	0	0	0	0	0	5	0	0	1	0
A0A075B6Z5	21	0.285714	0.142857	0.142857	0.142857	0	0.047619	0.190476	0	200.8	43.495	508.15	0.22	3.034	0	0	0	0	0	0	0	0	0	0	0	0	0	0	0	0	0	0	0	0	0	0	0	0	0	0	0	0	0	0	3	1	1	1	0
A0A075B6Z8	20	0.2	0.15	0.15	0.15	0.05	0.05	0.2	0	210.085	40.7526	503.526	0.172105	3.31526	0	0	0	0	0	0	0	0	0	0	0	0	0	0	0	0	0	0	0	0	0	0	0	0	0	0	0	0	0	0	4	1	0	0	0
A0A075B6Z9	21	0.190476	0.142857	0.333333	0.047619	0.047619	0.047619	0.142857	0	197.545	38.175	484.5	-0.0255	3.0015	0	0	0	0	0	0	0	0	0	0	0	0	0	0	0	0	0	0	0	0	0	0	0	0	0	0	0	0	0	0	2	1	3	0	0
A0A075B700	19	0.315789	0.0526316	0.263158	0.105263	0.0526316	0.0526316	0.105263	0	209.924	30.3889	473.278	0.122778	3.17333	0	0	0	0	0	0	0	0	0	0	0	0	1	1	0	0	0	0	0	0	0	0	0	0	0	0	0	0	0	0	4	0	1	0	0
A0A075B702	21	0.238095	0.0952381	0.380952	0.047619	0	0.047619	0.142857	0	195.714	30.105	529.4	0.3705	2.735	0	0	0	0	0	0	0	0	0	0	0	0	0	0	0	0	0	0	0	0	0	0	0	0	0	0	0	0	0	0	1	2	2	1	0
A0A075B704	21	0.190476	0.047619	0.285714	0.142857	0.047619	0.047619	0.190476	0	206.774	30.045	534.5	0.026	2.85	0	0	0	0	0	0	0	0	0	0	0	0	1	1	0	0	0	0	0	0	0	0	0	1	0	0	0	0	0	0	1	0	2	0	0
A0A075B706	17	0.235294	0.0588235	0.176471	0.176471	0.117647	0.0588235	0.117647	0	218.661	34.2	499.562	-0.046875	3.29	0	0	0	0	0	0	0	0	0	0	0	0	1	0	0	0	0	0	0	0	0	0	0	0	0	0	0	0	0	0	2	0	2	0	0
A0A075B708	20	0.3	0.1	0.2	0.25	0	0	0.1	0	231.759	40.6947	473.947	0.208947	3.78	0	0	0	0	0	0	0	0	0	0	0	0	0	0	0	0	0	0	0	0	0	0	0	0	0	0	0	0	0	0	5	0	1	0	0
A0A075B709	21	0.190476	0.0952381	0.333333	0.0952381	0	0.047619	0.190476	0	203.871	31.21	505.3	0.098	2.9435	0	0	0	0	0	0	0	0	0	0	0	0	0	0	0	0	0	0	0	0	0	0	0	0	0	0	0	0	0	0	3	0	2	1	0
A0A075B710	21	0.285714	0.047619	0.285714	0.0952381	0	0.047619	0.190476	0	200.638	33.045	484.3	0.3615	2.8685	0	0	0	0	0	0	0	0	0	0	0	0	1	1	0	0	0	0	0	0	0	0	0	0	0	0	0	0	0	0	0	0	0	0	0
A0A075B711	20	0.3	0.05	0.3	0.1	0	0.05	0.15	0	202.774	38.2684	529.158	0.214737	2.77947	0	0	0	0	0	0	0	0	0	0	0	0	1	0	0	0	0	0	0	0	0	0	0	0	0	0	0	0	0	0	5	1	2	0	0
A0A075B712	20	0.3	0.05	0.3	0.1	0	0.05	0.15	0	212.043	36.3842	486.895	0.163158	3.13211	0	0	0	0	0	0	0	0	0	0	0	0	0	0	0	0	0	0	0	0	0	0	0	0	0	0	0	0	0	0	1	0	1	0	0
A0A075B713	21	0.142857	0.0952381	0.428571	0.0952381	0.047619	0.047619	0.0952381	0	209.601	36.765	487.75	0.108	3.143	0	0	0	0	0	0	0	0	0	0	0	0	1	0	0	0	0	0	0	0	0	0	0	0	0	0	0	0	0	0	3	3	0	1	0
A0A075B714	20	0.3	0.1	0.2	0.1	0.05	0.05	0.15	0	207.145	31.9263	487.474	-0.0689474	3.13474	0	0	0	0	0	0	0	0	0	0	0	0	0	0	0	0	0	0	0	0	0	0	0	0	0	0	0	0	0	0	3	0	0	1	0
A0A075B734	347	0.377522	0.103746	0.18732	0.103746	0.0691643	0.054755	0.092219	0.0115274	206.708	36.8827	464.795	0.242594	3.2828	0	0	0	0	0	0	0	0	0	0	0	0	0	0	6	0.347701	0.994253	0	0	0.0373563	0	0.247126	0	7	0	0	0	0	0	0	39	5	1	0	0
A0A075B759	164	0.243902	0.109756	0.195122	0.176829	0.103659	0.0304878	0.115854	0.0243902	213.554	34.3177	469.171	0.0384756	3.32183	0	0	0	0	0	0	0	0	0	0	0	0	2	0	0	0	0	1	1	0	0	0	0	2	0	1	0	0	0	0	17	1	1	0	0
A0A075B767	164	0.25	0.103659	0.20122	0.170732	0.109756	0.0304878	0.109756	0.0243902	213.784	32.8244	467.878	0.045122	3.32402	0	0	0	0	0	0	0	0	0	0	0	0	1	0	0	0	0	1	1	0	0	0	0	3	0	0	0	0	0	0	17	1	1	0	0
A0A075B7B6	117	0.299145	0.111111	0.273504	0.119658	0.0512821	0.0598291	0.0683761	0.017094	211.585	35.7641	478.274	0.13735	3.36538	0	0	0	0	0	0	0	0	0	0	0	0	0	0	0	0	0	1	1	0.135593	0.415254	0	1	4	0	2	0	0	0	0	22	1	0	0	0
A0A075B7B8	117	0.307692	0.128205	0.25641	0.0854701	0.0769231	0.017094	0.102564	0.025641	206.507	33.6752	477.368	0.133419	3.25026	0	0	0	0	0	0	0	0	0	0	0	0	0	0	0	0	0	1	1	0	0	0	1	5	0	0	0	0	0	0	16	1	0	0	0
A0A075B7B9	11	0.0909091	0.272727	0.363636	0	0.0909091	0	0	0.0909091	205.388	20.66	421	0.23	3.579	0	0	0	0	0	0	0	0	0	0	0	0	0	0	0	0	0	0	0	0	0	0	0	0	0	0	0	0	0	0	4	0	0	2	0
A0A075B7D0	117	0.290598	0.119658	0.273504	0.119658	0.0683761	0.025641	0.0854701	0.017094	210.018	36.6333	467.479	0.0347863	3.30803	0	0	0	0	0	0	0	0	0	0	0	0	0	0	0	0	0	1	1	0	0.20339	0	1	6	0	0	0	0	0	0	17	3	0	1	0
A0A075B7D4	117	0.307692	0.0769231	0.324786	0.0598291	0.0598291	0.0598291	0.0854701	0.025641	206.074	35.6761	483.718	0.168034	3.07812	0	0	0	0	0	0	0	0	0	0	0	0	0	0	0	0	0	1	1	0.0762712	0	0	1	2	0	0	0	0	0	0	19	0	1	1	0
A0A075B7D8	119	0.336134	0.10084	0.235294	0.109244	0.0840336	0.00840336	0.10084	0.0252101	210.97	32.9824	490.176	0.097395	3.2605	0	0	0	0	0	0	0	0	0	0	0	0	0	0	0	0	0	1	1	0	0.308333	0	1	2	0	0	0	0	0	0	16	1	1	1	0
A0A075B7E0	11	0	0.545455	0.181818	0	0.0909091	0	0.0909091	0	209.276	25.18	365.7	0.411	4.783	0	0	0	0	0	0	0	0	0	0	0	0	0	0	0	0	0	0	0	0	0	0	0	0	0	0	0	0	0	0	2	0	0	0	0
A0A075B7E8	117	0.316239	0.119658	0.25641	0.0940171	0.0683761	0.017094	0.102564	0.025641	207.672	35.6299	473.667	0.134359	3.26718	0	0	0	0	0	0	0	0	0	0	0	0	0	0	0	0	0	1	1	0	0.398305	0	1	3	0	0	0	0	0	0	15	0	1	0	0
A0A075B7F0	116	0.336207	0.12069	0.206897	0.103448	0.0603448	0.0172414	0.12931	0.0258621	205.718	37.1379	485.345	0.0916379	3.17931	0	0	0	0	0	0	0	0	0	0	0	0	0	0	0	0	0	1	1	0	0.25641	0	1	5	0	0	0	0	0	0	15	0	0	0	0
A0A075B7F1	116	0.293103	0.12931	0.25	0.0775862	0.0775862	0.0344828	0.112069	0.0258621	205.051	33.9733	473.991	0.0912931	3.20414	0	0	0	0	0	0	0	0	0	0	0	0	0	0	0	0	0	1	1	0	0	0	1	7	0	0	0	0	0	0	15	0	1	0	0
A0A087WSX0	123	0.284553	0.097561	0.317073	0.0731707	0.0569106	0.0569106	0.0813008	0.0325203	203.521	33.378	483.642	0.193902	3.05756	0	0	0	0	0	0	0	0	0	0	0	0	0	0	0	0	0	1	1	0.112903	0.346774	0.346774	1	3	0	0	0	0	0	0	23	3	0	2	1
A0A087WSY0	165	0.2	0.0969697	0.290909	0.157576	0.139394	0.0606061	0.0363636	0.0181818	219.401	29.8236	430.4	0.0584242	3.60648	25.4545	0	0	0	42	0	0	0	1	0	0	0	3	2	0	0	0	0	0	0	0	0	0	2	0	0	0	0	0	0	0	0	1	0	0
A0A087WSY4	118	0.29661	0.127119	0.288136	0.110169	0.0338983	0.0423729	0.0847458	0.0169492	209.809	36.3068	483.737	0.200847	3.32339	0	0	0	0	0	0	0	0	0	0	0	0	0	0	0	0	0	1	1	0.12605	0.327731	0.697479	1	5	0	0	0	0	0	0	21	1	0	0	0
A0A087WSY6	115	0.321739	0.104348	0.304348	0.0521739	0.0608696	0.0695652	0.0695652	0.0173913	206.141	35.0939	475.513	0.220435	3.20617	0	0	0	0	0	0	0	0	0	0	0	0	0	0	0	0	0	1	1	0.0775862	0	0	1	3	0	0	0	0	0	0	28	0	0	1	0
A0A087WSZ0	117	0.307692	0.119658	0.290598	0.0598291	0.0512821	0.0598291	0.0769231	0.034188	206.442	34.6342	468.47	0.260769	3.24778	0	0	0	0	0	0	0	0	0	0	0	0	0	0	0	0	0	1	1	0.0762712	0	0	1	5	0	0	0	0	0	0	19	1	0	1	1
A0A087WSZ3	146	0.219178	0.10274	0.143836	0.0821918	0.0753425	0.191781	0.171233	0.0136986	193.484	36.9438	476.479	-0.112123	2.8363	69.863	0	0	0	102	0	0	0	1	0	0	0	5	4	0	0	0	0	0	0.401361	0.755102	0.755102	0	1	0	0	0	0	0	0	25	3	0	0	0
A0A087WSZ6	138	0.391304	0.057971	0.195652	0.115942	0.108696	0.0507246	0.0724638	0.00724638	210.16	30.3514	485.601	0.155942	3.20486	0	0	0	0	0	0	0	0	0	0	0	0	0	0	0	0	0	0	0	0.0791367	0.158273	0	0	5	0	0	0	0	0	0	25	2	1	0	0
A0A087WSZ9	112	0.294643	0.0982143	0.285714	0.125	0.0803571	0.0267857	0.0714286	0.0178571	214.213	30.8839	473.42	0.12375	3.40259	0	0	0	0	0	0	0	0	0	0	0	0	0	0	0	0	0	1	1	0	0	0	1	3	0	0	0	0	0	0	10	2	1	0	0
A0A087WT01	109	0.321101	0.100917	0.284404	0.0825688	0.0825688	0.0275229	0.0825688	0.0183486	210.847	31.9541	482.514	0.160183	3.31119	0	0	0	0	0	0	0	0	0	0	0	0	0	0	0	0	0	1	1	0.154545	0.2	0	1	7	0	0	0	0	0	0	26	0	0	1	0
A0A087WT02	112	0.294643	0.116071	0.258929	0.0892857	0.0982143	0.0357143	0.0892857	0.0178571	208.456	30.1259	489.312	0.171339	3.24571	0	0	0	0	0	0	0	0	0	0	0	0	0	0	0	0	0	1	1	0.079646	0	0	1	6	0	0	0	0	0	0	24	1	0	0	0
A0A087WT03	109	0.330275	0.0825688	0.266055	0.12844	0.0825688	0.0366972	0.0458716	0.0275229	216.126	32.9046	448.927	0.16	3.42128	0	0	0	0	0	0	0	0	0	0	0	0	0	0	0	0	0	1	1	0	0	0	1	3	0	0	0	0	0	0	24	0	0	0	0
A0A087WTG2	46	0.347826	0.0434783	0.195652	0.108696	0.0652174	0.173913	0.0217391	0.0434783	196.448	41.9174	482.087	-0.232609	2.68761	100	0	0	0	46	0	0	0	1	0	0	0	1	1	0	0	0	0	0	0.595745	0.595745	0.595745	0	0	0	0	0	0	0	0	0	0	2	0	0
A0A087WTH1	108	0.462963	0.0648148	0.0925926	0.12963	0.101852	0.037037	0.0555556	0.0555556	214.303	36.9407	485.093	0.0937963	3.30194	0	0	0	0	0	0	0	0	0	0	0	0	0	0	2	0.422018	0.981651	0	0	0.12844	0.550459	0.779817	0	2	0	0	0	0	0	0	9	1	0	0	0
A0A087WTH5	132	0.30303	0.106061	0.242424	0.128788	0.0909091	0.0606061	0.0606061	0.00757576	215.004	32.4379	457.848	0.160303	3.50038	0	0	0	0	0	0	0	0	0	0	0	0	0	0	1	0.12782	0.984962	0	0	0	0	0	0	5	0	0	0	0	0	0	15	2	1	0	2
A0A087WTJ2	511	0.307241	0.0782779	0.223092	0.146771	0.103718	0.0332681	0.0802348	0.0273973	216.124	36.9452	472.278	0.0191781	3.35949	0	8.21918	0	0	0	42	0	0	0	2	0	0	2	2	1	0.0488281	0.996094	2	1	0.0625	0.183594	0.263672	0	18	0	0	0	0	0	0	70	0	0	0	0
A0A087WTK9	89	0.348315	0.0337079	0.202247	0.191011	0.011236	0.0674157	0.146067	0	209.239	51.2022	527.124	0.0498876	2.9291	38.2022	0	0	0	34	0	0	0	1	0	0	0	3	1	0	0	0	0	0	0.477778	0.888889	0.888889	0	1	0	0	0	0	0	0	0	2	1	0	0
A0A087WTM6	91	0.274725	0.021978	0.153846	0.164835	0.0549451	0.0879121	0.208791	0.032967	206.836	54.2637	511.473	-0.140989	2.78549	60.4396	0	0	0	55	0	0	0	1	0	0	0	3	2	0	0	0	0	0	0.152174	0.478261	0.978261	0	0	0	0	0	0	0	0	0	2	1	0	0
A0A087WTY5	223	0.139013	0.0313901	0.116592	0.0852018	0.0762332	0.237668	0.309417	0.0044843	186.978	40.3507	507.036	-0.136054	2.39	34.0807	0	0	0	76	0	0	0	2	0	0	0	3	2	0	0	0	0	0	0.616071	0.982143	0.982143	0	0	0	0	0	0	0	0	43	0	0	0	0
A0A087WU04	20	0.25	0.1	0.35	0.05	0	0.05	0.15	0	202.546	39.2368	491.368	0.368947	2.99368	0	0	0	0	0	0	0	0	0	0	0	0	1	1	0	0	0	0	0	0	0	0	0	1	0	0	0	0	0	0	2	0	2	0	0
A0A087WU49	2812	0.243954	0.0668563	0.246088	0.109175	0.104552	0.094239	0.0785917	0.0565434	209.629	32.3502	459.809	0.0294061	3.15534	17.7809	0	0	0	500	0	0	0	1	0	0	0	17	13	1	0.00710985	0.999289	8	3	0.15855	0.291504	0.239957	1	99	0	0	0	0	0	0	4	0	0	0	0
A0A087WUF6	288	0.243056	0.0590278	0.145833	0.204861	0.0798611	0.0833333	0.163194	0.0208333	212.683	48.1472	496.594	-0.188681	3.08069	55.5556	0	0	0	160	0	0	0	1	0	0	0	5	4	0	0	0	0	0	0.377163	0.49827	0.539792	0	3	0	0	0	0	0	0	37	2	1	1	0
A0A087WUJ7	227	0.303965	0.110132	0.22467	0.123348	0.101322	0.0484581	0.061674	0.0264317	216.703	36.4088	465.004	0.0677974	3.5122	0	0	0	0	0	0	0	0	0	0	0	0	0	0	0	0	0	2	2	0.0921053	0.197368	0	1	8	0	0	0	0	0	0	40	0	1	0	0
A0A087WUL8	3843	0.215977	0.0634921	0.183971	0.139474	0.224304	0.0752017	0.0562061	0.0413739	219.784	29.2323	460.653	-0.206453	3.45143	17.8506	0.884725	0	0	686	34	0	0	17	1	0	0	65	61	0	0	0	45	1	0.175338	0.308533	0.744797	0	95	0	13	41	0	0	0	643	2	2	1	3
A0A087WUM0	186	0.295699	0.0645161	0.193548	0.134409	0.155914	0.0537634	0.102151	0	214.289	31.1478	471.86	-0.0133333	3.33511	0	11.2903	0	0	0	21	0	0	0	1	0	0	0	0	0	0	0	1	1	0	0.165775	0.26738	0	3	0	0	0	0	0	0	22	1	0	1	4
A0A087WUU8	490	0.187755	0.0857143	0.240816	0.238776	0.1	0.0265306	0.0591837	0.0612245	223.508	28.9127	443.641	-0.00469388	3.53861	0	0	0	0	0	0	0	0	0	0	0	0	0	0	0	0	0	13	2	0	0	0	0	9	0	0	0	0	0	0	39	3	3	1	0
A0A087WUV0	522	0.189655	0.0670498	0.254789	0.204981	0.136015	0.0402299	0.059387	0.0478927	220.27	32.0931	447.898	-0.0937356	3.43404	8.04598	0	0	0	42	0	0	0	1	0	0	0	5	5	0	0	0	10	1	0.0516252	0.0439771	0.342256	0	15	0	0	0	0	0	0	39	0	1	1	1
A0A087WV48	116	0.181034	0.0862069	0.275862	0.137931	0.0775862	0.103448	0.112069	0.0258621	208.064	41.119	449.828	0.0293966	3.19095	35.3448	0	0	0	41	0	0	0	1	0	0	0	3	2	0	0	0	0	0	0.136752	0.393162	0	0	3	0	0	0	0	0	0	21	3	2	0	0
A0A087WV49	185	0.275676	0.0864865	0.281081	0.108108	0.0594595	0.0702703	0.0702703	0.0486486	208.34	38.4589	470.108	0.206216	3.16665	0	0	0	0	0	0	0	0	0	0	0	0	0	0	0	0	0	1	1	0.0483871	0	0.263441	0	4	0	0	0	0	0	0	0	6	2	0	0
A0A087WV62	115	0.286957	0.113043	0.226087	0.113043	0.0956522	0.0608696	0.0521739	0.0521739	212.335	28.2278	460.113	0.0953043	3.36609	0	0	0	0	0	0	0	0	0	0	0	0	0	0	0	0	0	1	1	0	0	0	1	2	0	0	0	0	0	0	21	2	1	1	0
A0A087WVE0	104	0.153846	0.0673077	0.25	0.221154	0.0480769	0.125	0.0961538	0.0288462	224.012	53.0058	431.903	-0.155534	3.57709	74.0385	0	0	0	77	0	0	0	1	0	0	0	4	3	0	0	0	0	0	0.380952	0.228571	0.695238	0	0	0	0	0	0	0	0	20	0	1	0	0
A0A087WVF3	549	0.260474	0.0819672	0.187614	0.169399	0.114754	0.0856102	0.0765027	0.0236794	217.185	38.1264	454.211	-0.0460838	3.45455	18.3971	0	0	0	101	0	0	0	1	0	0	0	7	5	0	0	0	1	1	0.0527273	0.103636	0.205455	0	14	0	0	0	0	0	0	80	4	1	0	0
A0A087WVT2	117	0.316239	0	0.376068	0.0854701	0.0683761	0.0512821	0.0940171	0.00854701	209.217	31.3855	466.94	-0.0596581	3.01675	71.7949	0	0	0	84	0	0	0	2	0	0	0	4	2	0	0	0	0	0	0.254237	0.491525	0.652542	0	0	0	0	0	0	0	0	19	0	2	0	0
A0A087WVZ1	138	0.195652	0.0797101	0.297101	0.166667	0.0942029	0.0144928	0.144928	0	208.388	43.4869	500.139	-0.0514599	3.03971	36.2319	0	0	0	50	0	0	0	1	0	0	0	2	1	0	0	0	0	0	0.395683	0.431655	0.431655	0	4	0	0	0	0	0	0	29	9	0	0	0
A0A087WW39	1093	0.269899	0.0384263	0.277219	0.111619	0.0686185	0.0997255	0.110704	0.0237877	201.428	37.004	500.067	0.0222873	2.79684	43.1839	7.04483	0	0	472	77	0	0	4	2	0	0	24	19	0	0	0	2	1	0.416819	0.651737	0.798903	0	15	0	0	0	0	0	0	162	3	0	0	0
A0A087WW49	117	0.299145	0.111111	0.282051	0.111111	0.0512821	0.0598291	0.0683761	0.017094	210.429	34.8923	479.197	0.153077	3.33521	0	0	0	0	0	0	0	0	0	0	0	0	0	0	0	0	0	1	1	0.135593	0.415254	0	1	4	0	0	0	0	0	0	22	1	0	0	0
A0A087WW87	121	0.297521	0.0909091	0.256198	0.0661157	0.107438	0.0826446	0.0826446	0.0165289	207.844	33.2653	469.083	0.173223	3.25033	0	0	0	0	0	0	0	0	0	0	0	0	0	0	0	0	0	1	1	0	0	0	0	4	0	0	0	0	0	0	24	1	0	1	1
A0A087WWA1	95	0.263158	0.0842105	0.2	0.210526	0.0105263	0.126316	0.0947368	0.0105263	222.801	52.12	431.832	0.105684	3.63326	0	0	0	0	0	0	0	0	0	0	0	0	3	1	0	0	0	0	0	0	0.5	0.5	0	0	0	0	0	0	0	0	12	2	0	0	0
A0A087WWC2	235	0.229787	0.0680851	0.246809	0.182979	0.174468	0.0468085	0.0382979	0.012766	221.241	33.2009	452.915	-0.0834894	3.52004	60.4255	0	0	0	142	0	0	0	2	0	0	0	8	7	0	0	0	0	0	0.0677966	0.0932203	0	0	1	0	0	0	0	0	0	0	2	1	0	0
A0A087WWC5	75	0.333333	0.08	0.226667	0.106667	0.12	0.0266667	0.0533333	0.0533333	209.677	33.1667	466.467	0.0848	3.21973	0	0	0	0	0	0	0	0	0	0	0	0	0	0	0	0	0	0	0	0	0	0	0	0	0	0	0	0	0	0	8	0	1	0	0
A0A087WWC6	141	0.276596	0.106383	0.319149	0.0921986	0.12766	0.035461	0.0141844	0.0212766	211.703	27.4214	464.543	0.141429	3.35114	0	0	0	0	0	0	0	0	0	0	0	0	0	0	1	0.140845	0.985915	1	1	0	0.359155	0.471831	0	7	0	0	0	0	0	0	11	3	1	0	0
A0A087WWL8	130	0.292308	0.0923077	0.176923	0.115385	0.0769231	0.123077	0.0615385	0.0538462	211.257	38.0124	449.24	0.0647287	3.33969	0	0	0	0	0	0	0	0	0	0	0	0	0	0	0	0	0	0	0	0	0	0	0	5	0	0	0	0	0	0	21	0	0	0	0
A0A087WWN3	123	0.211382	0.0894309	0.178862	0.186992	0.138211	0.0162602	0.0894309	0.0813008	220.882	38.8418	450.32	-0.240492	3.44418	0	0	0	0	0	0	0	0	0	0	0	0	0	0	0	0	0	0	0	0	0	0	0	5	0	0	0	0	0	0	0	1	0	0	0
A0A087WWU0	41	0.146341	0.0243902	0.219512	0.195122	0.317073	0.0243902	0.0487805	0	220.183	17.5625	492.35	-0.6325	3.28125	46.3415	0	0	0	19	0	0	0	1	0	0	0	1	0	0	0	0	0	0	0.52381	0.595238	0	0	1	0	0	0	0	0	0	2	2	2	0	0
A0A087WWV3	80	0.25	0.1	0.1375	0.1375	0.1625	0.1125	0.0625	0.0375	220.77	36.5988	423.3	-0.0235	3.74538	0	0	0	0	0	0	0	0	0	0	0	0	1	1	0	0	0	0	0	0.222222	0.271605	0	0	4	0	0	0	0	0	0	10	1	1	0	0
A0A087WWW9	156	0.262821	0.0576923	0.237179	0.192308	0.179487	0.0320513	0.025641	0.0128205	225.213	29.6596	468.603	0.0135897	3.57385	0	0	0	0	0	0	0	0	0	0	0	0	1	1	0	0	0	1	1	0	0	0	0	4	0	0	0	0	0	0	33	0	1	0	0
A0A087WX66	33	0.454545	0.030303	0.181818	0.030303	0	0.181818	0.0606061	0.030303	198.767	35.5063	506.125	0.449062	2.83531	0	0	0	0	0	0	0	0	0	0	0	0	0	0	0	0	0	0	0	0.323529	0.764706	0	1	1	0	0	0	0	0	0	13	3	1	0	0
A0A087WX78	387	0.260982	0.0465116	0.211886	0.155039	0.118863	0.103359	0.0904393	0.0129199	209.359	39.2876	480.075	-0.203566	3.07783	58.3979	0	0	0	226	0	0	0	2	0	0	0	8	5	0	0	0	0	0	0.136598	0.445876	0.494845	0	0	0	0	0	0	0	0	47	2	1	0	1
A0A087WXF1	157	0.280255	0.0573248	0.216561	0.184713	0.101911	0.0636943	0.0700637	0.0254777	214.349	31.3369	489.892	-0.154841	3.18369	0	0	0	0	0	0	0	0	0	0	0	0	4	2	0	0	0	0	0	0.113924	0.113924	0.360759	0	2	0	0	0	0	0	0	16	1	1	0	0
A0A087WXI0	1021	0.264447	0.0470127	0.22331	0.122429	0.146915	0.0969638	0.0910872	0.00783546	209.29	37.0838	477.256	-0.130519	3.13104	52.1058	7.9334	0	0	532	81	0	0	3	2	0	0	17	13	0	0	0	1	1	0.121331	0.464775	0.609589	0	13	0	0	0	0	0	0	148	1	0	0	0
A0A087WXM4	84	0.297619	0.0357143	0.142857	0.154762	0.178571	0.0714286	0.0833333	0.0357143	215.92	29.0369	452.44	-0.107024	3.33845	0	0	0	0	0	0	0	0	0	0	0	0	1	0	0	0	0	0	0	0	0	0	0	0	0	0	0	0	0	0	15	0	1	1	0
A0A087WXM9	373	0.241287	0.0563003	0.300268	0.150134	0.123324	0.0616622	0.0482574	0.0187668	213.551	30.0434	484.78	-0.0334584	3.19	28.4182	0	0	0	106	0	0	0	1	0	0	0	8	5	0	0	0	0	0	0.131016	0.315508	0.719251	0	5	0	0	0	0	0	0	63	1	1	1	2
A0A087WXS9	549	0.260474	0.0819672	0.187614	0.169399	0.114754	0.0856102	0.0765027	0.0236794	217.131	38.1104	453.393	-0.0456831	3.45534	18.3971	0	0	0	101	0	0	0	1	0	0	0	7	5	0	0	0	1	1	0.0527273	0.103636	0.205455	0	14	0	0	0	0	0	0	80	4	1	0	1
A0A087WXW9	1838	0.173558	0.04679	0.136017	0.100653	0.121872	0.181719	0.232862	0.00652884	194.369	38.5647	498.81	-0.167062	2.63919	54.4614	0	0	0	1001	0	0	0	6	0	0	0	19	18	0	0	0	1	1	0.501903	0.70745	0.749864	1	15	0	0	0	0	0	0	279	1	1	0	0
A0A087WY39	42	0.261905	0.0952381	0.142857	0.142857	0.047619	0.142857	0.142857	0	202.776	42.5561	475.683	0.172683	3.10463	0	0	0	0	0	0	0	0	0	0	0	0	0	0	0	0	0	0	0	0	0	0	0	1	0	0	0	0	0	0	47	2	0	0	0
A0A087WYE8	117	0.34188	0.102564	0.264957	0.111111	0.0683761	0.017094	0.0598291	0.034188	210.366	33.9231	458.855	0.0552137	3.31735	0	0	0	0	0	0	0	0	0	0	0	0	0	0	0	0	0	1	1	0	0.29661	0	1	6	0	0	0	0	0	0	16	2	0	0	0
A0A087WYN8	130	0.215385	0.0538462	0.307692	0.184615	0.0307692	0.107692	0.0615385	0.0384615	211.855	47.2754	471.808	0.0164615	3.115	27.6923	0	0	0	36	0	0	0	1	0	0	0	5	3	0	0	0	0	0	0.259542	0.664122	0.80916	0	5	0	0	0	0	0	0	16	4	1	0	0
A0A087WZ39	114	0.263158	0.122807	0.263158	0.114035	0.0701754	0.0614035	0.0701754	0.0350877	211.002	32.3518	437.64	0.185965	3.43061	0	0	0	0	0	0	0	0	0	0	0	0	0	0	0	0	0	1	1	0	0	0	1	4	0	0	0	0	0	0	18	0	1	0	0
A0A087WZ48	48	0.1875	0.0625	0.166667	0.3125	0.104167	0.0416667	0.104167	0.0208333	231.063	47.8667	485.938	-0.284583	3.54646	0	0	0	0	0	0	0	0	0	0	0	0	1	1	0	0	0	0	0	0	0	0	0	0	0	0	0	0	0	0	0	3	4	1	0
A0A087WZ62	844	0.332938	0.143365	0.170616	0.123223	0.0841232	0.056872	0.0627962	0.0260664	213.515	35.3355	460.797	0.182666	3.5356	0	0	0	0	0	0	0	0	0	0	0	0	1	0	8	0.204734	0.997633	1	1	0.0485207	0.143195	0.101775	0	18	0	0	0	0	0	0	127	3	0	1	2
A0A087WZ72	601	0.319468	0.131448	0.216306	0.114809	0.104825	0.0482529	0.0532446	0.0116473	212.677	35.8313	466.363	0.0805657	3.46679	0	0	0	0	0	0	0	0	0	0	0	0	0	0	0	0	0	1	1	0.013289	0.0614618	0	0	11	0	0	0	0	0	0	0	0	0	0	0
A0A087WZ82	144	0.333333	0.0972222	0.138889	0.152778	0.111111	0.0486111	0.0833333	0.0347222	218.025	34.8021	471.611	0.0705556	3.47576	0	0	0	0	0	0	0	0	0	0	0	0	0	0	3	0.4	0.986207	0	0	0	0.4	0	1	4	0	0	0	0	0	0	18	1	1	1	1
A0A087WZF8	79	0.544304	0.0506329	0.21519	0.0379747	0	0.0126582	0.139241	0	187.285	38.4329	548.532	0.270633	2.39975	0	0	0	0	0	0	0	0	0	0	0	0	0	0	2	0.5	0.975	0	0	0.425	0.95	0.95	1	1	0	0	0	0	0	0	7	3	0	0	0
A0A087WZG4	1122	0.272727	0.0490196	0.229947	0.165775	0.14082	0.0659537	0.0641711	0.0106952	219.107	35.6915	472.646	-0.0748885	3.38809	37.4332	7.13012	0	0	420	80	0	0	5	2	0	0	16	15	0	0	0	3	3	0.159394	0.30276	0.463936	0	5	0	0	0	0	0	0	141	1	1	0	0
A0A087WZJ6	84	0.25	0.0952381	0.178571	0.166667	0.154762	0.0833333	0.0357143	0.0238095	217.426	24.7687	481.108	0.0155422	3.42349	0	0	0	0	0	0	0	0	0	0	0	0	0	0	0	0	0	0	0	0	0.564706	0.694118	0	1	0	0	0	0	0	0	55	1	2	1	0
A0A087WZP2	758	0.28496	0.0237467	0.288918	0.117414	0.0844327	0.0923483	0.0976253	0.0105541	203.752	36.1682	494.049	0.0438918	2.85373	63.9842	12.533	0	0	485	95	0	0	4	1	0	0	12	10	0	0	0	1	1	0.299078	0.575758	0.860343	0	4	0	0	0	0	0	0	84	0	0	0	0
A0A087WZV9	223	0.26009	0.0852018	0.237668	0.165919	0.121076	0.0403587	0.0762332	0.0134529	218.47	32.3623	466.61	0.00556054	3.46673	25.5605	0	0	0	57	0	0	0	1	0	0	0	2	1	1	0.0803571	0.991071	0	0	0	0	0.227679	0	2	0	0	0	0	0	0	35	6	1	0	0
A0A087WZY1	265	0.162264	0.0490566	0.279245	0.0792453	0.0679245	0.196226	0.154717	0.0113208	200.72	38.926	457.279	-0.146491	2.93589	63.0189	0	0	0	167	0	0	0	1	0	0	0	2	2	0	0	0	0	0	0.552632	0.530075	0.695489	0	5	0	0	0	0	0	0	44	1	0	0	1
A0A087WZY6	628	0.326433	0.0509554	0.211783	0.128981	0.125796	0.066879	0.0684713	0.0207006	212.632	28.308	474.944	0.0751752	3.23678	8.12102	0	0	0	51	0	0	0	1	0	0	0	5	2	0	0	0	2	2	0.111288	0.383148	0.669316	0	10	0	0	0	0	0	0	113	1	1	0	0
A0A087X002	238	0.180672	0.0840336	0.264706	0.0882353	0.0840336	0.0504202	0.109244	0.138655	206.141	30.3811	443.693	0.00243697	2.99634	0	0	0	0	0	0	0	0	0	0	0	0	0	0	0	0	0	6	1	0.0753138	0.0753138	0	0	5	0	0	0	0	0	0	25	4	0	0	0
A0A087X015	18	0.388889	0.111111	0.222222	0.222222	0	0	0	0.0555556	231.63	17.8778	510.667	0.291111	3.75667	0	0	0	0	0	0	0	0	0	0	0	0	0	0	0	0	0	0	0	0	0	0	0	0	0	0	0	0	0	0	0	2	1	0	0
A0A087X096	22	0.181818	0.0454545	0.363636	0.0909091	0	0.0454545	0.227273	0	198.807	34.2524	530.571	0.177619	2.61905	0	0	0	0	0	0	0	0	0	0	0	0	1	1	0	0	0	0	0	0	0	0	0	0	0	0	0	0	0	0	3	0	3	0	0
A0A087X0B0	139	0.28777	0.0431655	0.201439	0.143885	0.0935252	0.0863309	0.0935252	0.0503597	215.31	40.2353	473.353	0.0897122	3.24849	0	0	0	0	0	0	0	0	0	0	0	0	0	0	0	0	0	0	0	0	0.371429	0	0	7	0	0	0	0	0	0	0	2	0	0	0
A0A087X0B3	334	0.287425	0.10479	0.206587	0.143713	0.125749	0.0538922	0.0419162	0.0359281	217.825	30.3467	440.204	0.127695	3.5668	0	0	0	0	0	0	0	0	0	0	0	0	0	0	0	0	0	0	0	0.041791	0	0	0	9	0	0	0	0	0	0	59	2	0	1	0
A0A087X0F5	109	0.266055	0.0642202	0.183486	0.12844	0.119266	0.0642202	0.100917	0.0642202	209.565	38.0111	460.731	-0.0671296	3.1163	0	0	0	0	0	0	0	0	0	0	0	0	0	0	0	0	0	1	1	0	0	0	0	5	0	0	0	0	0	0	15	0	1	0	0
A0A087X0K7	114	0.298246	0.0877193	0.236842	0.140351	0.0877193	0.0614035	0.0614035	0.0263158	214.773	35.3079	442.544	0.134825	3.46544	0	0	0	0	0	0	0	0	0	0	0	0	2	0	0	0	0	1	1	0	0	0	1	4	0	0	0	0	0	0	20	1	0	0	0
A0A087X0M5	115	0.313043	0.0782609	0.165217	0.165217	0.0956522	0.0608696	0.0782609	0.0434783	217.954	37.4487	452.478	0.0106087	3.45435	0	0	0	0	0	0	0	0	0	0	0	0	1	0	0	0	0	1	1	0	0	0	1	5	0	0	0	0	0	0	13	3	0	0	1
A0A087X0R7	540	0.261111	0.0777778	0.212963	0.157407	0.122222	0.0777778	0.0703704	0.0203704	216.932	36.0713	453.313	0.00418519	3.45281	20.1852	0	0	0	109	0	0	0	3	0	0	0	6	6	0	0	0	1	1	0.142329	0.219963	0.249538	0	13	0	0	0	0	0	0	99	1	1	0	0
A0A087X0T9	212	0.231132	0.103774	0.240566	0.15566	0.15566	0.0660377	0.0283019	0.0188679	220.667	29.1486	450.868	-0.00566038	3.61627	0	0	0	0	0	0	0	0	0	0	0	0	1	0	0	0	0	0	0	0	0	0	0	5	0	0	0	0	0	0	33	0	0	0	0
A0A087X179	549	0.260474	0.0819672	0.187614	0.169399	0.114754	0.0856102	0.0765027	0.0236794	217.038	37.6419	454.914	-0.0448452	3.4496	18.3971	0	0	0	101	0	0	0	1	0	0	0	7	5	0	0	0	1	1	0.0527273	0.103636	0.205455	0	14	0	0	0	0	0	0	78	4	1	0	0
A0A087X1B8	175	0.274286	0.0857143	0.205714	0.142857	0.0742857	0.0914286	0.0857143	0.0342857	211.344	37.1339	461.971	0.0834483	3.29184	0	0	0	0	0	0	0	0	0	0	0	0	1	0	0	0	0	1	1	0.0454545	0.125	0	0	6	0	0	0	0	0	0	30	4	1	0	2
A0A087X1C1	80	0.1875	0.0625	0.275	0.2	0.1375	0.0625	0.05	0.025	220.99	30.875	471.488	-0.01425	3.43688	46.25	0	0	0	37	0	0	0	1	0	0	0	2	1	0	0	0	0	0	0.160494	0	0	0	0	0	0	0	0	0	0	7	3	1	0	0
A0A087X1C5	515	0.347573	0.0854369	0.163107	0.139806	0.0990291	0.0776699	0.0699029	0.0174757	214.31	38.8416	465.761	0.0698447	3.40755	0	0	0	0	0	0	0	0	0	0	0	0	0	0	1	0.0368217	0.996124	0	0	0.0503876	0	0	0	20	0	0	0	0	0	0	48	1	1	0	8
A0A087X1G2	549	0.262295	0.0819672	0.183971	0.17122	0.114754	0.0856102	0.0765027	0.0236794	217.28	37.8257	454.865	-0.0442805	3.45612	18.3971	0	0	0	101	0	0	0	1	0	0	0	7	5	0	0	0	1	1	0.0527273	0.103636	0.205455	0	14	0	0	0	0	0	0	82	4	1	0	1
A0A087X1K6	286	0.244755	0.048951	0.164336	0.216783	0.108392	0.118881	0.0699301	0.027972	214.409	45.7528	472.906	-0.230629	3.18818	67.8322	0	0	0	194	0	0	0	2	0	0	0	8	6	0	0	0	3	1	0.320557	0.54007	0.505226	0	0	0	0	0	0	0	0	34	9	1	1	0
A0A087X1L8	192	0.364583	0.0729167	0.270833	0.0729167	0.0833333	0.046875	0.0572917	0.03125	210.235	32.1599	476.49	0.182135	3.23167	0	0	0	0	0	0	0	0	0	0	0	0	0	0	1	0.119171	0.989637	1	1	0.227979	0.227979	0	1	7	0	0	0	0	0	0	25	3	1	0	1
A0A087X205	235	0.229787	0.0680851	0.242553	0.187234	0.170213	0.0510638	0.0382979	0.012766	221.512	33.8213	452.081	-0.0874468	3.5263	62.5532	0	0	0	147	0	0	0	2	0	0	0	7	6	0	0	0	0	0	0.0677966	0.0677966	0	0	0	0	0	0	0	0	0	0	2	1	0	0
A0A087X280	459	0.285403	0.0631808	0.16122	0.122004	0.143791	0.087146	0.119826	0.0174292	209.285	36.9597	481.222	-0.00832244	3.17401	32.6797	0	0	0	150	0	0	0	1	0	0	0	4	3	0	0	0	0	0	0.228261	0.332609	0.332609	0	13	0	0	0	0	0	0	0	0	0	1	0
A0A087X2G3	203	0.310345	0.0246305	0.433498	0.08867	0.044335	0.0640394	0.0295567	0.00492611	217.527	28.9749	438.502	0.111133	3.42202	17.734	15.7635	0	0	36	32	0	0	1	1	0	0	3	2	0	0	0	0	0	0.504902	0.627451	0.627451	0	0	0	0	0	0	0	0	28	0	1	0	0
A0A088AWK7	358	0.293296	0.0837989	0.223464	0.150838	0.125698	0.0530726	0.0446927	0.0251397	221.36	31.1894	452.316	0.0618994	3.615	0	0	0	0	0	0	0	0	0	0	0	0	0	0	0	0	0	2	1	0.0417827	0.167131	0	0	6	0	0	0	0	0	0	73	1	0	0	0
A0A088AWM3	1275	0.305098	0.0917647	0.251765	0.139608	0.123922	0.0368627	0.0219608	0.0290196	220.351	27.4718	448.805	0.16931	3.61355	0	0	0	0	0	0	0	0	0	0	0	0	0	0	0	0	0	0	0	0.0603448	0.101097	0.173197	0	26	0	0	0	0	0	0	217	2	1	0	0
A0A096LNH0	2916	0.308642	0.0812757	0.252743	0.100137	0.141975	0.0504115	0.0541838	0.0102881	210.348	30.2988	468.624	0.0701681	3.26812	0	0	0	0	0	0	0	0	0	0	0	0	10	4	1	0.007542	0.999314	21	1	0.0130271	0.0486802	0.080905	0	114	0	0	0	0	0	0	569	0	1	0	0
A0A096LNI7	61	0.213115	0.229508	0.213115	0.0819672	0.0491803	0.131148	0.0491803	0.0327869	203.544	41.482	420.459	0.327541	3.6	0	0	0	0	0	0	0	0	0	0	0	0	0	0	0	0	0	0	0	0.112903	0	0	1	4	0	0	0	0	0	0	0	0	0	0	0
A0A096LNJ3	149	0.281879	0.0805369	0.208054	0.100671	0.134228	0.0872483	0.0671141	0.0402685	208.159	33.1235	435.658	0.0940268	3.2947	0	0	0	0	0	0	0	0	0	0	0	0	0	0	0	0	0	1	1	0	0	0	0	5	0	0	0	0	0	0	0	2	3	2	0
A0A096LNJ8	35	0.4	0	0.2	0.171429	0.0857143	0.114286	0.0285714	0	217.883	42.1857	487.543	0.104857	3.25143	0	0	0	0	0	0	0	0	0	0	0	0	0	0	0	0	0	0	0	0	0	0	0	0	0	0	0	0	0	0	6	4	2	0	0
A0A096LNP1	70	0.271429	0.128571	0.185714	0.157143	0.1	0.0428571	0.0285714	0.0857143	220.541	30.4514	427.086	0.113143	3.64129	0	0	0	0	0	0	0	0	0	0	0	0	0	0	0	0	0	0	0	0	0	0	1	1	0	0	0	0	0	0	8	0	0	0	0
A0A096LNT2	108	0.185185	0.0648148	0.222222	0.194444	0.037037	0.101852	0.148148	0.0462963	212.397	51.2093	465.139	-0.0627778	3.15	0	0	0	0	0	0	0	0	0	0	0	0	3	3	0	0	0	0	0	0.201835	0.385321	0.385321	0	1	0	0	0	0	0	0	5	1	0	0	1
A0A096LP01	95	0.231579	0.157895	0.242105	0.115789	0.115789	0.0526316	0.0842105	0	212.46	33.0684	464.958	0.0456842	3.53358	0	0	0	0	0	0	0	0	0	0	0	0	0	0	1	0.208333	0.979167	0	0	0	0	0	0	3	0	0	0	0	0	0	9	2	3	1	2
A0A096LP38	46	0.195652	0.0869565	0.282609	0.173913	0.173913	0.0217391	0.0434783	0.0217391	221.202	29.3522	410.152	-0.06	3.71065	0	0	0	0	0	0	0	0	0	0	0	0	1	1	0	0	0	0	0	0	0	0	0	0	0	0	0	0	0	0	0	2	2	0	0
A0A096LP49	1063	0.252117	0.0498589	0.227658	0.157103	0.0912512	0.111947	0.0856068	0.0244591	210.994	42.171	477.789	-0.133989	3.13151	55.3151	3.85701	0	0	588	41	0	0	11	1	0	0	23	20	0	0	0	0	0	0.0864662	0.336466	0.703947	0	10	0	2	0	0	0	0	124	3	2	1	3
A0A096LP55	91	0.230769	0.043956	0.153846	0.164835	0.318681	0.021978	0.021978	0.043956	223.085	23.7011	442.725	-0.216264	3.58648	34.0659	0	0	0	31	0	0	0	1	0	0	0	2	2	0	0	0	0	0	0.0978261	0.51087	0.858696	0	0	0	0	1	0	1	0	15	3	2	0	0
A0A096LP99	479	0.338205	0.0876827	0.185804	0.137787	0.112735	0.0542797	0.039666	0.0438413	221.517	34.428	452.939	0.175595	3.6257	0	0	0	0	0	0	0	0	0	0	0	0	0	0	0	0	0	0	0	0	0.129167	0.141667	0	7	0	0	0	0	0	0	92	1	0	0	0
A0A096LPE2	208	0.283654	0.139423	0.1875	0.139423	0.105769	0.0240385	0.105769	0.0144231	211.031	38.2346	473.37	0.0376923	3.38567	0	0	0	0	0	0	0	0	0	0	0	0	0	0	0	0	0	0	0	0.0909091	0.110048	0	1	6	0	0	0	0	0	0	20	0	0	0	0
A0A096LPE4	126	0.277778	0.0873016	0.230159	0.150794	0.0714286	0.103175	0.0634921	0.015873	213.473	36.0571	459.071	0.222937	3.40571	0	0	0	0	0	0	0	0	0	0	0	0	0	0	0	0	0	0	0	0.275591	0.377953	0	0	4	0	0	0	0	0	0	24	1	1	0	0
A0A096LPF7	62	0.193548	0.241935	0.225806	0.0806452	0.0645161	0.129032	0.0483871	0.016129	208.204	43.6871	429.839	0.231129	3.73742	0	0	0	0	0	0	0	0	0	0	0	0	0	0	0	0	0	0	0	0.111111	0	0	0	1	0	0	0	0	0	0	0	0	0	0	0
A0A096LPG2	23	0.173913	0.130435	0.173913	0.130435	0.0869565	0.130435	0.0434783	0.130435	217.636	41.7391	407.304	0.25087	3.6687	0	0	0	0	0	0	0	0	0	0	0	0	0	0	0	0	0	0	0	0	0	0	0	0	0	0	0	0	0	0	3	2	0	0	0
A0A096LPH7	203	0.315271	0.0591133	0.236453	0.123153	0.133005	0.0591133	0.0492611	0.0246305	209.034	32.2163	468.172	0.0403448	3.18576	0	0	0	0	0	0	0	0	0	0	0	0	2	2	0	0	0	0	0	0	0.289216	0.382353	0	8	0	0	0	0	0	0	33	0	0	0	0
A0A096LPI5	108	0.268519	0.0740741	0.25	0.148148	0.0555556	0.0925926	0.0462963	0.0648148	212.828	38.7972	446.065	0.0925	3.30352	0	0	0	0	0	0	0	0	0	0	0	0	0	0	0	0	0	0	0	0	0	0	0	4	0	0	0	0	0	0	16	0	0	0	0
A0A096LPI6	279	0.369176	0.0573477	0.154122	0.168459	0.114695	0.0358423	0.078853	0.0179211	213.896	32.5475	486.504	-0.0139568	3.25763	0	0	0	0	0	0	0	0	0	0	0	0	0	0	0	0	0	1	1	0	0.107143	0	0	8	0	0	0	0	0	0	30	0	2	0	0
A0A096LPK6	155	0.290323	0.135484	0.193548	0.135484	0.103226	0.0903226	0.0387097	0.0129032	216.331	35.2316	452.71	0.135419	3.65052	0	0	0	0	0	0	0	0	0	0	0	0	0	0	0	0	0	0	0	0.0512821	0.128205	0	0	5	0	0	0	0	0	0	33	1	0	0	0
A0A096LPK9	316	0.446203	0.113924	0.161392	0.0981013	0.0506329	0.0411392	0.0506329	0.0379747	215.348	32.0383	452.43	0.422911	3.55639	0	0	0	0	0	0	0	0	0	0	0	0	0	0	7	0.473186	0.993691	1	1	0.129338	0.119874	0.236593	0	1	0	0	0	0	0	0	25	1	0	0	0
A0A0A0MQR6	114	0.359649	0.0438596	0.280702	0.0877193	0.0877193	0.0526316	0.0701754	0.0175439	207.987	34.5781	483.693	0.114825	3.07	26.3158	0	0	0	30	0	0	0	1	0	0	0	0	0	1	0.208696	0.982609	0	0	0.330435	0.495652	0.286957	0	2	0	0	0	0	0	0	0	1	0	0	0
A0A0A0MQY0	276	0.264493	0.0688406	0.181159	0.155797	0.115942	0.0905797	0.0942029	0.0289855	210.959	36.437	463.312	-0.0877536	3.19707	34.7826	0	0	0	96	0	0	0	1	0	0	0	5	5	0	0	0	2	2	0	0	0	0	9	0	0	0	0	0	0	35	0	1	2	0
A0A0A0MQY5	61	0.377049	0	0.278689	0.0327869	0.0819672	0.0983607	0.0819672	0.0491803	197.794	30.7557	495.328	0.163443	2.66328	0	0	0	0	0	0	0	0	0	0	0	0	1	1	0	0	0	0	0	0.209677	0.580645	0	0	1	0	0	0	0	0	0	9	0	1	0	1
A0A0A0MR12	285	0.312281	0.0315789	0.214035	0.154386	0.126316	0.0982456	0.0421053	0.0210526	216.657	39.0937	464.67	-0.0356491	3.29632	21.4035	0	0	0	61	0	0	0	1	0	0	0	9	7	0	0	0	0	0	0.125874	0.454545	0.293706	0	3	0	0	0	0	0	0	85	1	3	0	0
A0A0A0MR58	231	0.229437	0.0692641	0.242424	0.190476	0.17316	0.047619	0.034632	0.012987	222.247	33.774	452.571	-0.0988312	3.54515	55.8442	0	0	0	129	0	0	0	2	0	0	0	8	6	0	0	0	0	0	0.0689655	0.0689655	0	0	2	0	0	0	0	0	0	0	1	0	0	0
A0A0A0MR76	192	0.260417	0.078125	0.15625	0.15625	0.15625	0.0625	0.0989583	0.03125	213.145	37.1349	459.818	-0.0786979	3.30682	37.5	0	0	0	72	0	0	0	1	0	0	0	2	2	0	0	0	0	0	0	0.15544	0	0	2	0	0	0	0	0	0	21	2	1	0	0
A0A0A0MRE4	234	0.32906	0.0897436	0.205128	0.136752	0.123932	0.0470085	0.042735	0.0213675	217.657	30.8567	451.747	-0.0415451	3.51262	0	0	0	0	0	0	0	0	0	0	0	0	0	0	0	0	0	1	1	0	0	0	0	10	0	0	0	0	0	0	10	2	1	1	0
A0A0A0MRP1	719	0.350487	0.140473	0.183588	0.10153	0.0723227	0.0458971	0.0625869	0.0431154	214.495	30.3199	451.359	0.278929	3.55049	0	0	0	0	0	0	0	0	0	0	0	0	0	0	9	0.283333	0.997222	0	0	0.0416667	0.130556	0.1	0	8	0	0	0	0	0	0	63	0	0	0	0
A0A0A0MRS2	164	0.29878	0.0792683	0.25	0.0914634	0.0731707	0.0853659	0.0914634	0.0304878	203.67	37.236	484.079	-0.0215854	3.00189	18.9024	0	0	0	31	0	0	0	1	0	0	0	0	0	0	0	0	1	1	0.0545455	0.187879	0.412121	0	9	0	0	0	0	0	0	0	1	0	0	0
A0A0A0MRU1	237	0.320675	0.0632911	0.194093	0.168776	0.0843882	0.0675105	0.0464135	0.0548523	219.582	39.2127	447.549	0.124684	3.45785	0	0	0	0	0	0	0	0	0	0	0	0	3	3	1	0.0840336	0.991597	0	0	0.151261	0.214286	0.310924	0	4	0	0	0	0	0	0	24	1	3	0	0
A0A0A0MRU5	358	0.268156	0.167598	0.173184	0.125698	0.106145	0.0670391	0.0726257	0.0195531	213.904	33.1729	443.874	0.147542	3.64539	0	0	0	0	0	0	0	0	0	0	0	0	0	0	0	0	0	0	0	0.0807799	0.119777	0.119777	1	7	0	0	0	0	0	0	64	1	1	0	0
A0A0A0MRY3	69	0.289855	0.0724638	0.246377	0.115942	0.101449	0.101449	0.057971	0.0144928	208.825	31.2478	476.971	-0.0513043	3.17435	0	0	0	0	0	0	0	0	0	0	0	0	1	0	0	0	0	0	0	0	0	0	0	3	0	0	0	0	0	0	0	0	1	0	0
A0A0A0MRY4	1105	0.262443	0.0597285	0.237104	0.154751	0.132127	0.0579186	0.0696833	0.0262443	213.86	34.9404	472.046	-0.0767059	3.23938	34.0271	0	0	0	376	0	0	0	6	0	0	0	19	16	0	0	0	3	3	0.0605787	0.273056	0.446655	0	17	0	0	0	0	0	0	130	1	0	0	0
A0A0A0MRZ7	120	0.308333	0.108333	0.266667	0.075	0.0916667	0.0583333	0.075	0.0166667	208.029	34.4092	466.958	0.20725	3.30033	0	0	0	0	0	0	0	0	0	0	0	0	0	0	0	0	0	1	1	0	0	0	1	6	0	0	0	0	0	0	30	1	0	1	0
A0A0A0MRZ8	115	0.304348	0.104348	0.286957	0.0695652	0.0782609	0.0782609	0.0608696	0.0173913	207.619	36.2122	475.296	0.18687	3.24739	0	0	0	0	0	0	0	0	0	0	0	0	0	0	0	0	0	1	1	0.0775862	0	0	1	5	0	0	0	0	0	0	25	0	0	1	0
A0A0A0MRZ9	124	0.25	0.104839	0.314516	0.0967742	0.0564516	0.0564516	0.0967742	0.0241935	204.681	36.6161	475.194	0.179032	3.13153	0	0	0	0	0	0	0	0	0	0	0	0	0	0	0	0	0	1	1	0.136	0.376	0.376	1	5	0	0	0	0	0	0	21	2	1	2	0
A0A0A0MS00	114	0.289474	0.0789474	0.298246	0.0701754	0.0964912	0.0701754	0.0789474	0.0175439	205.393	33.0219	465.877	0.0557895	3.11395	0	0	0	0	0	0	0	0	0	0	0	0	3	1	0	0	0	1	1	0	0	0	1	3	0	0	0	0	0	0	22	0	0	2	0
A0A0A0MS01	117	0.324786	0.0769231	0.273504	0.153846	0.0940171	0.025641	0.034188	0.017094	219.104	29.4239	470.487	0.124957	3.45632	0	0	0	0	0	0	0	0	0	0	0	0	0	0	0	0	0	1	1	0	0	0	0	1	0	0	0	0	0	0	19	1	0	0	0
A0A0A0MS02	117	0.282051	0.128205	0.264957	0.111111	0.0769231	0.042735	0.0683761	0.025641	213.558	33.965	467.718	0.190769	3.45068	0	0	0	0	0	0	0	0	0	0	0	0	0	0	0	0	0	1	1	0	0	0	1	4	0	0	0	0	0	0	15	1	1	1	0
A0A0A0MS03	114	0.27193	0.105263	0.245614	0.0964912	0.0789474	0.0614035	0.105263	0.0350877	208.659	37.164	464.86	0.122281	3.26544	0	0	0	0	0	0	0	0	0	0	0	0	0	0	0	0	0	1	1	0.13913	0	0	1	3	0	0	0	0	0	0	15	2	0	0	1
A0A0A0MS04	114	0.315789	0.114035	0.245614	0.0964912	0.0701754	0.0526316	0.0701754	0.0350877	208.158	30.6395	467.675	0.159561	3.27035	0	0	0	0	0	0	0	0	0	0	0	0	0	0	0	0	0	1	1	0	0	0	1	4	0	0	0	0	0	0	12	2	1	0	0
A0A0A0MS05	114	0.263158	0.0964912	0.263158	0.0877193	0.0701754	0.0701754	0.114035	0.0350877	206.108	34.5825	469.588	0.145351	3.16035	0	0	0	0	0	0	0	0	0	0	0	0	0	0	0	0	0	1	1	0	0.217391	0	1	6	0	0	0	0	0	0	9	2	0	0	0
A0A0A0MS06	115	0.278261	0.0782609	0.269565	0.13913	0.0782609	0.0434783	0.0608696	0.0521739	213.55	28.2165	459.409	0.104696	3.304	0	0	0	0	0	0	0	0	0	0	0	0	0	0	0	0	0	1	1	0.103448	0	0	1	5	0	0	0	0	0	0	15	2	0	0	0
A0A0A0MS14	117	0.299145	0.145299	0.273504	0.119658	0.0769231	0.017094	0.0512821	0.017094	214.487	35.2786	449.47	0.0937607	3.56299	0	0	0	0	0	0	0	0	0	0	0	0	0	0	0	0	0	1	1	0	0	0	1	5	0	0	0	0	0	0	23	2	0	0	0
A0A0A0MS15	119	0.302521	0.12605	0.218487	0.109244	0.0840336	0.0168067	0.117647	0.0252101	209.092	36.3765	487.235	0.0531092	3.25588	0	0	0	0	0	0	0	0	0	0	0	0	0	0	0	0	0	1	1	0	0.216667	0	1	3	0	0	0	0	0	0	13	1	1	1	0
A0A0A0MS41	321	0.367601	0.0872274	0.214953	0.109034	0.0685358	0.0685358	0.0654206	0.0186916	212.283	34.9445	464.62	0.120935	3.34386	0	0	0	0	0	0	0	0	0	0	0	0	0	0	1	0.0714286	0.993789	0	0	0.0465839	0.223602	0.142857	0	6	0	0	0	0	0	0	37	0	0	1	0
A0A0A0MS56	375	0.352	0.064	0.186667	0.117333	0.0933333	0.0373333	0.101333	0.048	209.017	29.3304	491.648	0.0711467	3.07285	0	0	0	0	0	0	0	0	0	0	0	0	0	0	0	0	0	1	1	0.037234	0.0957447	0.244681	0	9	0	0	0	0	0	0	45	0	0	0	0
A0A0A0MSA5	98	0.27551	0.0816327	0.234694	0.173469	0.0918367	0.0816327	0.0510204	0.0102041	216.233	35.5929	455.378	-0.00204082	3.44888	0	0	0	0	0	0	0	0	0	0	0	0	2	0	0	0	0	0	0	0	0	0	0	4	0	0	0	0	0	0	0	2	3	0	0
A0A0A0MSL8	147	0.360544	0.0680272	0.136054	0.14966	0.108844	0.047619	0.102041	0.0272109	210.426	40.1619	478.49	-0.0727891	3.18293	0	0	0	0	0	0	0	0	0	0	0	0	0	0	0	0	0	1	1	0	0	0	0	8	0	0	0	0	0	0	21	2	1	0	1
A0A0A0MST0	317	0.337539	0.0694006	0.179811	0.135647	0.126183	0.0694006	0.0536278	0.0283912	216.373	35.3363	469.691	0.000788644	3.38293	0	0	0	0	0	0	0	0	0	0	0	0	0	0	0	0	0	2	2	0.157233	0.169811	0.525157	0	10	0	0	0	0	0	0	58	1	0	0	0
A0A0A0MSY2	949	0.306639	0.0874605	0.220232	0.12961	0.133825	0.0484721	0.0484721	0.0252898	215.702	28.5695	461.773	0.0605901	3.43391	6.84932	0	0	0	65	0	0	0	1	0	0	0	5	4	0	0	0	0	0	0.0157895	0.0715789	0.166316	0	21	0	0	0	0	0	0	139	3	2	2	0
A0A0A0MT08	1334	0.344078	0.0457271	0.235382	0.132684	0.101949	0.065967	0.0532234	0.0209895	214.474	32.1334	472.417	0.139805	3.2938	10.4198	0	0	0	139	0	0	0	2	0	0	0	13	10	2	0.0284644	0.998502	0	0	0.0771536	0.181273	0.322846	0	42	0	0	0	0	0	0	207	2	3	0	1
A0A0A0MT24	364	0.197802	0.043956	0.239011	0.197802	0.159341	0.0741758	0.0576923	0.0302198	217.538	33.0047	472.538	-0.178324	3.27786	48.3516	0	0	0	176	0	0	0	2	0	0	0	8	7	0	0	0	1	1	0.216438	0.509589	0.509589	0	5	0	0	0	0	0	0	61	2	0	0	0
A0A0A0MT36	114	0.27193	0.0877193	0.333333	0.0877193	0.0701754	0.0701754	0.0614035	0.0175439	207.006	33.6886	478.193	0.150526	3.14693	0	0	0	0	0	0	0	0	0	0	0	0	0	0	0	0	0	1	1	0	0	0	1	5	0	0	0	0	0	0	22	1	0	0	0
A0A0A0MT69	12	0.25	0.0833333	0.166667	0.166667	0.0833333	0	0.25	0	208.102	31.2083	542.417	0.1175	2.95083	0	0	0	0	0	0	0	0	0	0	0	0	0	0	0	0	0	0	0	0	0	0	0	0	0	0	0	0	0	0	2	0	2	0	0
A0A0A0MT70	18	0.388889	0.0555556	0.277778	0.0555556	0	0	0.166667	0	195.166	43.1	564	0.256471	2.55118	0	0	0	0	0	0	0	0	0	0	0	0	0	0	0	0	0	0	0	0	0	0	0	0	0	0	0	0	0	0	3	2	1	0	0
A0A0A0MT76	42	0.214286	0.119048	0.238095	0.119048	0.047619	0.142857	0.0714286	0.047619	215.64	42.5048	448.929	0.0645238	3.51167	0	0	0	0	0	0	0	0	0	0	0	0	0	0	0	0	0	0	0	0	0	0	0	1	0	0	0	0	0	0	5	2	2	0	0
A0A0A0MT78	16	0.125	0.1875	0.3125	0.0625	0.0625	0.0625	0.125	0	208.654	37.5467	465.733	0.136667	3.454	0	0	0	0	0	0	0	0	0	0	0	0	0	0	0	0	0	0	0	0	0	0	0	0	0	0	0	0	0	0	4	0	1	1	1
A0A0A0MT82	47	0.361702	0.0851064	0.191489	0.0212766	0.0212766	0.106383	0.191489	0.0212766	184.518	39.0532	534.489	0.0517021	2.40957	0	0	0	0	0	0	0	0	0	0	0	0	0	0	0	0	0	0	0	0.375	0.8125	0.8125	0	5	0	0	0	0	0	0	7	2	1	0	0
A0A0A0MT84	20	0.25	0.1	0.3	0.15	0.05	0.05	0.05	0	215.087	38.1474	487.526	0.21	3.35474	0	0	0	0	0	0	0	0	0	0	0	0	0	0	0	0	0	0	0	0	0	0	0	0	0	0	0	0	0	0	6	1	2	0	0
A0A0A0MT85	13	0.153846	0.0769231	0.230769	0.153846	0.0769231	0	0.153846	0.0769231	215.441	26.15	492.167	0.0766667	3.14917	0	0	0	0	0	0	0	0	0	0	0	0	0	0	0	0	0	0	0	0	0	0	0	0	0	0	0	0	0	0	2	1	0	0	0
A0A0A0MT86	24	0.25	0.166667	0.208333	0.0833333	0.125	0.0416667	0.125	0	211.195	37.8292	454.292	0.0991667	3.62	0	0	0	0	0	0	0	0	0	0	0	0	0	0	0	0	0	0	0	0	0	0	0	0	0	0	0	0	0	0	3	1	0	0	0
A0A0A0MT87	17	0.352941	0.117647	0.235294	0.117647	0	0	0.117647	0	210.531	36.6562	514.875	0.18875	3.21	0	0	0	0	0	0	0	0	0	0	0	0	0	0	0	0	0	0	0	0	0	0	0	0	0	0	0	0	0	0	4	1	0	0	0
A0A0A0MT89	12	0.166667	0.166667	0.25	0.166667	0.0833333	0	0.166667	0	217.463	32.0667	469.417	0.0225	3.62	0	0	0	0	0	0	0	0	0	0	0	0	0	0	0	0	0	0	0	0	0	0	0	0	0	0	0	0	0	0	2	0	2	0	0
A0A0A0MT92	15	0.4	0.0666667	0.266667	0	0	0	0.2	0.0666667	193.055	35.32	539	0.296667	2.538	0	0	0	0	0	0	0	0	0	0	0	0	0	0	0	0	0	0	0	0	0	0	0	0	0	0	0	0	0	0	2	1	0	0	0
A0A0A0MT93	23	0.304348	0.0869565	0.26087	0.0869565	0	0	0.173913	0.0869565	204.729	36.9565	499.522	0.0147826	2.86261	0	0	0	0	0	0	0	0	0	0	0	0	0	0	0	0	0	0	0	0	0	0	0	0	0	0	0	0	0	0	2	2	1	0	0
A0A0A0MT94	17	0.235294	0.117647	0.235294	0.0588235	0.117647	0	0.176471	0	204.911	38.4562	514.312	0.310625	3.13875	0	0	0	0	0	0	0	0	0	0	0	0	0	0	0	0	0	0	0	0	0	0	0	1	0	0	0	0	0	0	2	1	1	0	0
A0A0A0MT96	13	0.153846	0.153846	0.153846	0.153846	0.0769231	0.0769231	0.153846	0	207.787	32.7333	488.583	0.0908333	3.25167	0	0	0	0	0	0	0	0	0	0	0	0	0	0	0	0	0	0	0	0	0	0	0	0	0	0	0	0	0	0	2	0	2	0	0
A0A0A0MT97	20	0.25	0.15	0.25	0.1	0.05	0.05	0.1	0	208.643	34.3842	485.368	0.344211	3.36316	0	0	0	0	0	0	0	0	0	0	0	0	0	0	0	0	0	0	0	0	0	0	0	0	0	0	0	0	0	0	6	1	1	0	0
A0A0A0MT99	50	0.24	0.12	0.26	0.08	0.04	0.06	0.16	0.04	203.954	38.222	457.82	0.1774	3.2324	0	0	0	0	0	0	0	0	0	0	0	0	0	0	0	0	0	0	0	0	0.54902	0	0	1	0	0	0	0	0	0	5	0	0	0	0
A0A0A0MTA1	11	0.454545	0.0909091	0.181818	0	0	0	0.272727	0	197.125	36.1818	520.909	0.558182	2.85818	0	0	0	0	0	0	0	0	0	0	0	0	0	0	0	0	0	0	0	0	0	0	0	0	0	0	0	0	0	0	2	0	1	0	0
A0A0A0MTA2	15	0.533333	0	0	0.133333	0	0	0.333333	0	199.952	52.98	608.467	0.206	2.484	0	0	0	0	0	0	0	0	0	0	0	0	0	0	0	0	0	0	0	0.9375	0	0	0	1	0	0	0	0	0	0	1	0	1	0	0
A0A0A0MTA3	13	0.230769	0.0769231	0.230769	0.153846	0.0769231	0	0.153846	0	222.583	37.6917	480.25	0.230833	3.47667	0	0	0	0	0	0	0	0	0	0	0	0	0	0	0	0	0	0	0	0	0	0	0	0	0	0	0	0	0	0	1	0	1	0	0
A0A0A0MTA4	16	0.25	0.125	0.25	0.0625	0.0625	0.0625	0.125	0	214.727	35.9333	472.4	0.236	3.53933	0	0	0	0	0	0	0	0	0	0	0	0	0	0	0	0	0	0	0	0	0	0	0	0	0	0	0	0	0	0	3	0	1	1	0
A0A0A0MTA7	17	0.176471	0.176471	0.294118	0.0588235	0.0588235	0.0588235	0.117647	0	208.738	37.4312	467.812	0.278125	3.47375	0	0	0	0	0	0	0	0	0	0	0	0	0	0	0	0	0	0	0	0	0	0	0	0	0	0	0	0	0	0	4	1	1	1	0
A0A0A0MTG1	1061	0.326107	0.0791706	0.174364	0.137606	0.110273	0.0838831	0.0697455	0.0188501	213.318	38.1491	465.351	0.0239868	3.37798	1.88501	2.82752	0	0	20	30	0	0	1	1	0	0	6	2	0	0	0	2	2	0.0649718	0.211864	0.329567	0	34	0	0	0	0	0	0	152	1	0	0	0
A0A0A0MTU3	205	0.4	0.131707	0.185366	0.097561	0.107317	0.0243902	0.0341463	0.0146341	215.045	33.2157	444.152	0.292255	3.64686	0	0	0	0	0	0	0	0	0	0	0	0	0	0	2	0.194175	0.990291	0	0	0	0	0	0	1	0	0	0	0	0	0	82	0	0	0	0
A0A0A6YY96	963	0.320872	0.0841121	0.205607	0.123572	0.105919	0.0571132	0.0841121	0.0186916	210.427	31.5071	480.148	0.077892	3.23244	0	0	0	0	0	0	0	0	0	0	0	0	1	0	0	0	0	3	2	0.0248963	0.0580913	0.106846	0	33	0	0	0	0	0	0	141	1	0	0	0
A0A0A6YY99	330	0.318182	0.0636364	0.209091	0.160606	0.0969697	0.0545455	0.0848485	0.0121212	216.146	41.2879	479.288	-0.0789394	3.31382	22.7273	0	0	0	75	0	0	0	1	0	0	0	2	0	1	0.081571	0.993958	2	1	0.135952	0.44713	0.326284	0	12	0	0	0	0	0	0	43	1	0	0	0
A0A0A6YYA0	188	0.260638	0.12234	0.207447	0.132979	0.12766	0.0478723	0.0691489	0.0319149	213.409	33.8277	460.926	-0.0107447	3.41293	0	0	0	0	0	0	0	0	0	0	0	0	0	0	0	0	0	1	1	0.037037	0.179894	0	1	5	0	0	0	0	0	0	28	3	0	1	0
A0A0A6YYC5	116	0.301724	0.12069	0.293103	0.0775862	0.0862069	0.0344828	0.0689655	0.0172414	208.778	29.5069	466.328	0.162414	3.32371	0	0	0	0	0	0	0	0	0	0	0	0	0	0	0	0	0	1	1	0	0	0	1	9	0	0	0	0	0	0	15	2	0	0	0
A0A0A6YYC7	529	0.224953	0.0378072	0.189036	0.213611	0.166352	0.0831758	0.0567108	0.0283554	220.958	35.6662	465.83	-0.242439	3.36609	53.4972	0	0	0	283	0	0	0	2	0	0	0	9	8	0	0	0	4	1	0.377358	0.586792	0.666038	0	3	0	0	0	0	0	0	78	3	2	0	1
A0A0A6YYC8	382	0.23822	0.0471204	0.225131	0.138743	0.125654	0.0890052	0.104712	0.0314136	209.918	38.4736	482.024	-0.0382723	3.09772	10.2094	0	0	0	39	0	0	0	1	0	0	0	8	7	1	0.0626632	0.994778	0	0	0.16188	0.603133	0.788512	0	3	0	0	0	0	0	0	62	4	0	0	0
A0A0A6YYD4	124	0.290323	0.104839	0.233871	0.112903	0.104839	0.0645161	0.0564516	0.0322581	212.079	32.6734	454.282	0.137097	3.39742	0	0	0	0	0	0	0	0	0	0	0	0	0	0	0	0	0	1	1	0	0	0	1	6	0	0	0	0	0	0	11	4	0	0	0
A0A0A6YYD5	115	0.295652	0.0956522	0.243478	0.113043	0.104348	0.0608696	0.0434783	0.0434783	212.487	32.5635	438.826	0.160609	3.40722	0	0	0	0	0	0	0	0	0	0	0	0	0	0	0	0	0	1	1	0	0	0	1	6	0	0	0	0	0	0	19	1	0	0	0
A0A0A6YYF3	556	0.361511	0.0845324	0.192446	0.122302	0.104317	0.0413669	0.0629496	0.0305755	212.544	31.4068	467.989	0.15464	3.34371	0	0	0	0	0	0	0	0	0	0	0	0	1	0	0	0	0	2	2	0.0179533	0.125673	0.149013	0	10	0	0	0	0	0	0	77	0	0	0	0
A0A0A6YYG2	114	0.315789	0.122807	0.245614	0.0789474	0.0614035	0.0614035	0.0789474	0.0350877	207.688	31.0307	458.123	0.202368	3.30491	0	0	0	0	0	0	0	0	0	0	0	0	0	0	0	0	0	1	1	0	0	0	1	4	0	0	0	0	0	0	15	2	1	0	1
A0A0A6YYG3	113	0.327434	0.106195	0.265487	0.079646	0.0530973	0.0530973	0.079646	0.0353982	205.62	32.4142	467.708	0.197522	3.18575	0	0	0	0	0	0	0	0	0	0	0	0	0	0	0	0	0	1	1	0	0	0	1	4	0	0	0	0	0	0	10	1	0	0	1
A0A0A6YYG9	625	0.3088	0.0864	0.1984	0.1392	0.1392	0.0608	0.0384	0.0288	217.902	32.1302	446.096	0.033584	3.53357	0	4.8	0	0	0	30	0	0	0	1	0	0	1	0	0	0	0	0	0	0.0734824	0.0846645	0.290735	0	20	0	0	0	0	0	0	75	4	0	0	3
A0A0A6YYH1	394	0.329949	0.071066	0.182741	0.134518	0.149746	0.035533	0.0812183	0.0152284	213.753	31.1424	470.967	0.0271574	3.32909	0	0	0	0	0	0	0	0	0	0	0	0	1	0	0	0	0	1	1	0	0.0734177	0	0	10	0	0	0	0	0	0	51	2	0	0	2
A0A0A6YYH2	397	0.24937	0.0579345	0.196474	0.229219	0.108312	0.093199	0.0403023	0.0251889	223.872	37.2607	451.924	-0.0623678	3.55582	44.5844	0	0	0	177	0	0	0	2	0	0	0	10	7	1	0.0628141	0.994975	0	0	0.145729	0.38191	0.603015	0	1	0	0	0	0	0	0	66	4	2	0	3
A0A0A6YYI6	481	0.178794	0.0810811	0.261954	0.199584	0.120582	0.033264	0.0665281	0.0582121	219.406	30.5441	446.742	-0.0379418	3.42746	0	0	0	0	0	0	0	0	0	0	0	0	1	0	0	0	0	11	2	0	0	0	0	18	0	0	0	0	0	0	56	0	0	1	10
A0A0A6YYJ0	341	0.222874	0.0674487	0.214076	0.143695	0.143695	0.0439883	0.0821114	0.0821114	213.702	29.4754	449.17	-0.145044	3.20771	0	0	0	0	0	0	0	0	0	0	0	0	1	0	1	0.0672515	0.994152	4	2	0.0877193	0.0877193	0	0	12	0	0	0	0	0	0	38	2	1	0	0
A0A0A6YYJ7	113	0.318584	0.132743	0.221239	0.106195	0.079646	0.0442478	0.079646	0.0176991	211.325	34.754	471.761	0.176637	3.4246	0	0	0	0	0	0	0	0	0	0	0	0	0	0	0	0	0	1	1	0	0	0	1	2	0	0	0	0	0	0	18	1	0	0	0
A0A0A6YYJ9	748	0.328877	0.113636	0.239305	0.108289	0.0641711	0.0334225	0.0842246	0.0280749	210.785	31.2353	470.234	0.28631	3.33265	0	0	0	0	0	0	0	0	0	0	0	0	0	0	12	0.360481	0.99733	2	2	0.0680908	0.130841	0.202937	0	19	0	0	0	0	0	0	100	2	2	0	1
A0A0A6YYK1	113	0.345133	0.141593	0.20354	0.115044	0.0707965	0.0353982	0.0707965	0.0176991	211.984	31.5655	466.673	0.23531	3.4977	0	0	0	0	0	0	0	0	0	0	0	0	0	0	0	0	0	1	1	0	0	0	1	1	0	0	0	0	0	0	14	1	0	0	0
A0A0A6YYK4	115	0.295652	0.0956522	0.217391	0.156522	0.0782609	0.026087	0.104348	0.026087	212.034	37.94	487.348	-0.000956522	3.2307	0	0	0	0	0	0	0	0	0	0	0	0	0	0	0	0	0	1	1	0	0	0	1	4	0	0	0	0	0	0	15	0	1	0	0
A0A0A6YYK5	440	0.229545	0.0727273	0.238636	0.152273	0.111364	0.0954545	0.0863636	0.0136364	210.514	34.1682	464.452	-0.00725	3.23716	39.0909	0	0	0	172	0	0	0	2	0	0	0	14	12	0	0	0	3	3	0.0816327	0.378685	0.485261	0	1	0	0	0	0	0	0	76	4	2	0	0
A0A0A6YYK6	109	0.311927	0.119266	0.220183	0.155963	0.0825688	0.0458716	0.0458716	0.0183486	220.621	32.9936	465.358	0.16156	3.63459	0	0	0	0	0	0	0	0	0	0	0	0	0	0	0	0	0	1	1	0.0818182	0	0	1	1	0	0	0	0	0	0	23	0	0	0	0
A0A0A6YYK7	116	0.310345	0.12931	0.310345	0.0775862	0.112069	0.0172414	0.0172414	0.0258621	213.463	30.2233	461.483	0.0853448	3.45793	0	0	0	0	0	0	0	0	0	0	0	0	0	0	0	0	0	1	1	0	0	0	1	3	0	0	0	0	0	0	14	2	0	0	0
A0A0A6YYL0	155	0.348387	0.154839	0.16129	0.0967742	0.122581	0.0193548	0.0903226	0.00645161	214.471	31.3497	463.865	0.259548	3.63974	0	0	0	0	0	0	0	0	0	0	0	0	0	0	3	0.378205	0.987179	1	1	0	0	0	0	3	0	0	0	0	0	0	22	0	0	0	0
A0A0A6YYL1	179	0.296089	0.0837989	0.206704	0.145251	0.145251	0.0446927	0.0614525	0.0167598	218.489	30.9944	451.754	0.0335196	3.51872	0	0	0	0	0	0	0	0	0	0	0	0	0	0	0	0	0	0	0	0.0666667	0	0	0	2	0	0	0	0	0	0	30	0	0	1	1
A0A0A6YYL3	544	0.279412	0.0404412	0.229779	0.172794	0.167279	0.0275735	0.0514706	0.03125	220.274	27.1208	463.91	-0.0578125	3.40325	23.7132	3.86029	0	0	129	21	0	0	1	1	0	0	5	4	0	0	0	0	0	0	0.143119	0.411009	0	7	0	0	0	0	0	0	60	2	0	0	1
A0A0A6YYL6	228	0.263158	0.0921053	0.22807	0.214912	0.0701754	0.0526316	0.0526316	0.0263158	223.708	33.6702	453.781	0.0211842	3.62632	0	0	0	0	0	0	0	0	0	0	0	0	0	0	0	0	0	0	0	0	0	0	0	8	0	0	0	0	0	0	32	0	1	0	1
A0A0B4J1R7	106	0.349057	0.0188679	0.311321	0.132075	0.113208	0.00943396	0.0566038	0.00943396	216.134	28.8953	477.123	0.0688679	3.24085	0	0	0	0	0	0	0	0	0	0	0	0	0	0	0	0	0	0	0	0	0	0	0	1	0	0	0	0	0	0	11	0	0	0	0
A0A0B4J1U3	117	0.290598	0.0940171	0.307692	0.0598291	0.0854701	0.0598291	0.0769231	0.025641	201.955	33.1214	485.162	0.113504	3.01556	0	0	0	0	0	0	0	0	0	0	0	0	1	0	0	0	0	1	1	0.110169	0	0	1	2	0	0	0	0	0	0	14	0	0	2	0
A0A0B4J1U4	118	0.29661	0.127119	0.245763	0.135593	0.0847458	0.0423729	0.0508475	0.0169492	217.375	34.7602	461.008	0.182034	3.59068	0	0	0	0	0	0	0	0	0	0	0	0	0	0	0	0	0	1	1	0	0	0	1	4	0	0	0	0	0	0	27	0	1	1	0
A0A0B4J1U6	114	0.298246	0.105263	0.245614	0.0964912	0.0877193	0.0350877	0.0877193	0.0438596	210.321	34.486	471.254	0.144912	3.28053	0	0	0	0	0	0	0	0	0	0	0	0	0	0	0	0	0	1	1	0.104348	0	0	1	3	0	0	0	0	0	0	10	1	0	0	1
A0A0B4J1U7	121	0.289256	0.115702	0.330579	0.0826446	0.0495868	0.0578512	0.0578512	0.0165289	210.845	34.4306	471.678	0.164711	3.35256	0	0	0	0	0	0	0	0	0	0	0	0	1	0	0	0	0	1	1	0	0.262295	0.540984	1	8	0	0	0	0	0	0	16	0	0	0	0
A0A0B4J1V0	119	0.294118	0.109244	0.235294	0.109244	0.0840336	0.0252101	0.117647	0.0252101	208.079	34.1966	489.588	0.0916807	3.18697	0	0	0	0	0	0	0	0	0	0	0	0	0	0	0	0	0	1	1	0	0	0	1	8	0	0	0	0	0	0	16	1	1	1	0
A0A0B4J1V1	117	0.324786	0.119658	0.247863	0.0940171	0.0769231	0.017094	0.0940171	0.025641	208.464	35.3624	488.41	0.102222	3.24205	0	0	0	0	0	0	0	0	0	0	0	0	0	0	0	0	0	1	1	0.101695	0.101695	0	1	6	0	0	0	0	0	0	14	0	1	0	0
A0A0B4J1V2	119	0.319328	0.0756303	0.319328	0.10084	0.0756303	0.0504202	0.0336134	0.0252101	213.485	29.8773	473.874	0.267479	3.32538	0	0	0	0	0	0	0	0	0	0	0	0	0	0	0	0	0	1	1	0.0916667	0.558333	0.391667	1	6	0	0	0	0	0	0	23	0	0	0	0
A0A0B4J1V6	119	0.319328	0.109244	0.243697	0.117647	0.0672269	0.00840336	0.109244	0.0252101	207.664	36.0286	495.672	0.0432773	3.14798	0	0	0	0	0	0	0	0	0	0	0	0	0	0	0	0	0	1	1	0	0.4	0	1	3	0	0	0	0	0	0	11	1	1	1	0
A0A0B4J1V7	117	0.290598	0.162393	0.290598	0.0598291	0.0512821	0.034188	0.0940171	0.017094	202.074	33.5778	461.393	0.164615	3.26282	0	0	0	0	0	0	0	0	0	0	0	0	0	0	0	0	0	1	1	0	0	0	1	9	0	0	0	0	0	0	28	2	0	0	0
A0A0B4J1V8	794	0.350126	0.0730479	0.18262	0.15869	0.0869018	0.0579345	0.0667506	0.0239295	215.029	36.9492	475.824	0.0163728	3.33442	9.19395	2.14106	0	0	73	17	0	0	2	1	0	0	7	2	8	0.187421	0.997484	2	2	0.103145	0.227673	0.308176	0	18	0	0	0	0	0	0	84	5	0	1	1
A0A0B4J1W7	369	0.265583	0.0677507	0.208672	0.181572	0.105691	0.0948509	0.0379404	0.0379404	220.496	34.1293	447.046	0.0508401	3.51014	4.06504	0	0	0	15	0	0	0	1	0	0	0	8	5	0	0	0	0	0	0.108108	0.327027	0.272973	0	5	0	0	0	0	0	0	73	0	0	0	5
A0A0B4J1X5	117	0.316239	0.119658	0.247863	0.102564	0.0683761	0.017094	0.102564	0.025641	208.203	37.1513	482.581	0.0852137	3.24427	0	0	0	0	0	0	0	0	0	0	0	0	0	0	0	0	0	1	1	0	0.398305	0	1	3	0	0	0	0	0	0	16	1	1	0	0
A0A0B4J1X8	118	0.305085	0.127119	0.228814	0.0932203	0.101695	0.0169492	0.101695	0.0254237	208.378	33.4229	477.203	0.0811017	3.29771	0	0	0	0	0	0	0	0	0	0	0	0	0	0	0	0	0	1	1	0	0.310924	0	1	3	0	0	0	0	0	0	19	1	0	0	0
A0A0B4J1Y8	123	0.284553	0.0813008	0.268293	0.0894309	0.0731707	0.0569106	0.130081	0.0162602	203.742	35.4431	494.098	0.139593	3.0078	0	0	0	0	0	0	0	0	0	0	0	0	0	0	0	0	0	1	1	0.112903	0.33871	0.33871	1	7	0	0	0	0	0	0	21	3	0	1	0
A0A0B4J1Y9	119	0.294118	0.117647	0.243697	0.109244	0.092437	0.0168067	0.10084	0.0252101	210.344	34.9328	478.311	0.0334454	3.29773	0	0	0	0	0	0	0	0	0	0	0	0	1	0	0	0	0	1	1	0	0.308333	0.308333	1	2	0	0	0	0	0	0	14	1	0	1	0
A0A0B4J1Z2	117	0.282051	0.145299	0.290598	0.0769231	0.042735	0.0683761	0.0683761	0.025641	207.67	36.141	465.197	0.19	3.33162	0	0	0	0	0	0	0	0	0	0	0	0	0	0	0	0	0	1	1	0	0	0	1	6	0	0	0	0	0	0	17	0	1	1	0
A0A0B4J200	16	0.1875	0.125	0.375	0.0625	0.0625	0.0625	0.125	0	206.907	38.1125	483.625	0.2375	3.18375	0	0	0	0	0	0	0	0	0	0	0	0	1	0	0	0	0	0	0	0	0	0	0	0	0	0	0	0	0	0	4	0	2	1	0
A0A0B4J203	849	0.265018	0.0812721	0.220259	0.130742	0.166078	0.0530035	0.0753828	0.00824499	212.482	30.2227	470.388	-0.0129211	3.30938	27.3263	0	0	0	232	0	0	0	3	0	0	0	11	9	0	0	0	1	1	0.0694118	0.202353	0.370588	0	9	0	0	0	0	0	0	133	11	4	0	0
A0A0B4J234	112	0.348214	0.133929	0.241071	0.0892857	0.0714286	0.0357143	0.0535714	0.0267857	209.341	32.8295	473.759	0.123393	3.37179	0	0	0	0	0	0	0	0	0	0	0	0	0	0	0	0	0	1	1	0	0	0	1	4	0	0	0	0	0	0	20	0	0	0	0
A0A0B4J235	113	0.327434	0.106195	0.256637	0.106195	0.0884956	0.0265487	0.0707965	0.0176991	212.557	31.754	460.77	0.136372	3.40159	0	0	0	0	0	0	0	0	0	0	0	0	0	0	0	0	0	1	1	0	0	0	1	6	0	0	0	0	0	0	25	0	0	1	0
A0A0B4J237	113	0.336283	0.106195	0.265487	0.106195	0.0707965	0.0442478	0.0530973	0.0176991	209.531	31.208	483.283	0.218407	3.29469	0	0	0	0	0	0	0	0	0	0	0	0	0	0	0	0	0	1	1	0	0	0	1	1	0	0	2	0	0	0	20	1	0	0	0
A0A0B4J238	106	0.283019	0.141509	0.273585	0.0754717	0.0849057	0.0188679	0.103774	0.0188679	207.429	29.4075	465.774	0.248962	3.3517	0	0	0	0	0	0	0	0	0	0	0	0	0	0	0	0	0	1	1	0	0.317757	0	1	3	0	0	0	0	0	0	21	1	0	0	0
A0A0B4J240	114	0.263158	0.105263	0.350877	0.114035	0.0614035	0.0263158	0.0526316	0.0263158	214.924	29.4579	462.974	0.225702	3.40737	0	0	0	0	0	0	0	0	0	0	0	0	0	0	0	0	0	1	1	0	0.217391	0	1	6	0	0	0	0	0	0	31	4	0	1	0
A0A0B4J241	112	0.303571	0.0982143	0.267857	0.116071	0.116071	0.0357143	0.0446429	0.0178571	213.36	29.4054	463.688	0.0675	3.38179	0	0	0	0	0	0	0	0	0	0	0	0	0	0	0	0	0	1	1	0	0	0	1	2	0	0	0	0	0	0	21	0	0	0	0
A0A0B4J244	114	0.324561	0.131579	0.254386	0.0877193	0.0701754	0.0526316	0.0614035	0.0175439	208.013	30.2351	476.667	0.156842	3.31211	0	0	0	0	0	0	0	0	0	0	0	0	0	0	0	0	0	1	1	0	0	0	1	1	0	0	0	0	0	0	16	0	0	0	0
A0A0B4J245	112	0.303571	0.125	0.285714	0.0982143	0.0892857	0.0357143	0.0357143	0.0267857	215.803	32.8625	458.955	0.133661	3.54188	0	0	0	0	0	0	0	0	0	0	0	0	0	0	0	0	0	1	1	0.185841	0.185841	0	1	2	0	0	0	0	0	0	20	2	1	0	0
A0A0B4J247	110	0.263636	0.136364	0.172727	0.209091	0.118182	0.0363636	0.0545455	0.00909091	225.814	36.4082	441.491	0.0853636	3.85564	0	0	0	0	0	0	0	0	0	0	0	0	0	0	0	0	0	0	0	0	0	0	0	1	0	0	0	0	0	0	0	1	0	0	0
A0A0B4J248	108	0.287037	0.148148	0.268519	0.0555556	0.0925926	0.0185185	0.111111	0.0185185	203.608	32.5481	473.546	0.177685	3.24602	0	0	0	0	0	0	0	0	0	0	0	0	0	0	0	0	0	1	1	0	0.330275	0	1	9	0	0	0	0	0	0	20	1	0	0	0
A0A0B4J249	113	0.283186	0.132743	0.274336	0.0973451	0.123894	0.00884956	0.0530973	0.0265487	213.978	28.4752	457.85	0.216106	3.51115	0	0	0	0	0	0	0	0	0	0	0	0	0	0	0	0	0	1	1	0	0	0	1	2	0	0	0	0	0	0	23	1	1	0	0
A0A0B4J262	113	0.327434	0.132743	0.283186	0.0707965	0.079646	0.0442478	0.0442478	0.0176991	210.454	30.9717	470.805	0.193982	3.41903	0	0	0	0	0	0	0	0	0	0	0	0	0	0	0	0	0	1	1	0	0	0	1	3	0	0	0	0	0	0	21	1	0	0	0
A0A0B4J263	110	0.354545	0.1	0.236364	0.127273	0.1	0.0181818	0.0454545	0.0181818	216.978	29.0845	471.773	0.232182	3.51236	0	0	0	0	0	0	0	0	0	0	0	0	0	0	0	0	0	1	1	0	0	0	1	2	0	0	0	0	0	0	25	0	0	0	0
A0A0B4J264	116	0.301724	0.12069	0.336207	0.0862069	0.0862069	0.0258621	0.0172414	0.0258621	214.036	28.2819	448.026	0.120172	3.49388	0	0	0	0	0	0	0	0	0	0	0	0	0	0	0	0	0	1	1	0	0	0	1	3	0	0	0	0	0	0	20	1	1	0	0
A0A0B4J265	109	0.33945	0.0550459	0.266055	0.12844	0.100917	0.0458716	0.0458716	0.0183486	214.181	31.9367	456.688	0.188532	3.33147	0	0	0	0	0	0	0	0	0	0	0	0	0	0	0	0	0	1	1	0	0	0	1	5	0	0	0	0	0	0	26	0	0	0	0
A0A0B4J266	112	0.366071	0.0625	0.258929	0.142857	0.0535714	0.0267857	0.0625	0.0267857	214.07	33.7393	466.705	0.187232	3.30768	0	0	0	0	0	0	0	0	0	0	0	0	0	0	0	0	0	1	1	0	0	0	1	2	0	0	0	0	0	0	14	1	0	0	0
A0A0B4J268	109	0.311927	0.100917	0.321101	0.0917431	0.0733945	0.0458716	0.0366972	0.0183486	213.503	30.9037	461.128	0.16578	3.38174	0	0	0	0	0	0	0	0	0	0	0	0	0	0	0	0	0	1	1	0.109091	0	0	1	2	0	0	0	0	0	0	24	0	0	0	0
A0A0B4J269	797	0.361355	0.0890841	0.21079	0.104141	0.102886	0.0388959	0.0627353	0.0301129	211.609	32.5799	466.182	0.137315	3.32615	1.75659	1.75659	0	0	14	14	0	0	1	1	0	0	2	0	6	0.16416	0.997494	1	1	0.139098	0.255639	0.337093	0	27	0	0	0	0	0	0	126	3	2	3	0
A0A0B4J271	114	0.289474	0.140351	0.280702	0.0964912	0.0877193	0.0438596	0.0438596	0.0175439	214.26	30.5667	451.982	0.179825	3.58219	0	0	0	0	0	0	0	0	0	0	0	0	0	0	0	0	0	1	1	0.173913	0.173913	0	1	4	0	0	0	0	0	0	23	3	1	0	0
A0A0B4J272	114	0.27193	0.131579	0.263158	0.105263	0.105263	0.0526316	0.0438596	0.0263158	211.285	28.7193	460.079	0.195614	3.44175	0	0	0	0	0	0	0	0	0	0	0	0	0	0	0	0	0	1	1	0	0	0	1	2	0	0	0	0	0	0	18	1	0	0	0
A0A0B4J273	112	0.3125	0.0803571	0.267857	0.116071	0.0982143	0.0178571	0.0892857	0.0178571	213.173	25.8714	475.866	0.168125	3.33652	0	0	0	0	0	0	0	0	0	0	0	0	0	0	0	0	0	1	1	0.106195	0	0	1	5	0	0	0	0	0	0	15	1	0	0	0
A0A0B4J274	112	0.276786	0.107143	0.214286	0.116071	0.142857	0.0446429	0.0714286	0.0267857	214.563	30.0768	475.116	0.0898214	3.44634	0	0	0	0	0	0	0	0	0	0	0	0	1	0	0	0	0	1	1	0	0	0	1	2	0	0	0	0	0	0	14	1	0	0	0
A0A0B4J275	112	0.321429	0.0535714	0.321429	0.125	0.0982143	0.00892857	0.0535714	0.0178571	216.595	33.2875	477.696	0.130536	3.31625	0	0	0	0	0	0	0	0	0	0	0	0	1	0	0	0	0	1	1	0.0707965	0.230088	0	1	8	0	0	0	0	0	0	10	1	0	0	0
A0A0B4J276	109	0.275229	0.100917	0.33945	0.110092	0.0550459	0.0275229	0.0733945	0.0183486	214.869	29.1615	447.431	0.181193	3.46826	0	0	0	0	0	0	0	0	0	0	0	0	0	0	0	0	0	1	1	0	0	0	1	6	0	0	0	0	0	0	15	0	1	0	0
A0A0B4J277	110	0.309091	0.0909091	0.318182	0.0727273	0.0636364	0.0363636	0.0727273	0.0363636	210.864	32.1527	468.527	0.193273	3.26855	0	0	0	0	0	0	0	0	0	0	0	0	0	0	0	0	0	1	1	0	0	0	1	7	0	0	0	0	0	0	19	1	0	1	0
A0A0B4J279	112	0.339286	0.0714286	0.321429	0.0714286	0.0803571	0.0357143	0.0625	0.0178571	211.229	32.3205	486.366	0.206518	3.24179	0	0	0	0	0	0	0	0	0	0	0	0	1	0	0	0	0	1	1	0.115044	0	0	1	11	0	0	0	0	0	0	18	1	0	0	0
A0A0B4J280	105	0.27619	0.114286	0.333333	0.0666667	0.0666667	0.0380952	0.0857143	0.0190476	207.453	26.3448	472.019	0.25981	3.24571	0	0	0	0	0	0	0	0	0	0	0	0	0	0	0	0	0	1	1	0	0	0	1	5	0	0	0	0	0	0	25	0	0	0	0
A0A0B4J293	547	0.270567	0.0859232	0.177331	0.155393	0.131627	0.0621572	0.0621572	0.0548446	218.695	35.4355	447.689	-0.0648446	3.49066	0	0	0	0	0	0	0	0	0	0	0	0	1	0	0	0	0	1	1	0.0218978	0.0456204	0.0857664	0	15	0	0	0	0	0	0	61	0	1	2	0
A0A0B4J2A0	478	0.364017	0.0711297	0.228033	0.100418	0.08159	0.0585774	0.0794979	0.0167364	206.891	37.7525	477.584	0.0500628	3.13573	0	0	0	0	0	0	0	0	0	0	0	0	0	0	0	0	0	1	1	0.0438413	0.112735	0.187891	0	18	0	0	0	0	0	0	57	1	0	0	0
A0A0B4J2A1	72	0.402778	0.0555556	0.236111	0.0833333	0.0833333	0.0138889	0.0972222	0.0277778	209.777	31.3708	487.069	0.23875	3.18361	0	0	0	0	0	0	0	0	0	0	0	0	0	0	0	0	0	0	0	0	0	0	1	2	0	0	0	0	0	0	18	0	1	0	0
A0A0B4J2A2	164	0.243902	0.109756	0.20122	0.170732	0.103659	0.0304878	0.115854	0.0243902	212.882	33.5762	468.86	0.0484756	3.3064	0	0	0	0	0	0	0	0	0	0	0	0	1	0	0	0	0	1	1	0	0	0	0	2	0	2	0	1	0	0	17	1	1	0	0
A0A0B4J2B5	98	0.255102	0.122449	0.295918	0.102041	0.0714286	0.0204082	0.112245	0.0204082	206.287	34.7878	491.776	0.0253061	3.13878	0	0	0	0	0	0	0	0	0	0	0	0	0	0	0	0	0	1	1	0.121212	0	0	0	6	0	0	0	0	0	0	17	6	2	2	1
A0A0B4J2B6	119	0.310924	0.0840336	0.319328	0.10084	0.0672269	0.0504202	0.0420168	0.0252101	212.551	29.7992	470.824	0.340252	3.34042	0	0	0	0	0	0	0	0	0	0	0	0	0	0	0	0	0	1	1	0	0.408333	0.408333	1	11	0	0	0	0	0	0	19	0	1	0	0
A0A0B4J2B8	117	0.324786	0.111111	0.25641	0.102564	0.0598291	0.017094	0.0854701	0.042735	208.785	35.7547	457.915	0.095641	3.28077	0	0	0	0	0	0	0	0	0	0	0	0	0	0	0	0	0	1	1	0	0	0	1	7	0	0	0	0	0	0	16	2	0	0	0
A0A0B4J2C4	111	0.369369	0.0540541	0.225225	0.045045	0.108108	0.0900901	0.0900901	0.018018	200.97	35.6847	499.532	0.127748	2.91613	0	0	0	0	0	0	0	0	0	0	0	0	0	0	0	0	0	0	0	0	0	0	0	6	0	0	0	0	0	0	15	0	1	0	0
A0A0B4J2D5	268	0.391791	0.0410448	0.149254	0.156716	0.100746	0.0447761	0.0932836	0.0223881	207.975	36.3657	500.306	-0.108545	2.98869	0	0	0	0	0	0	0	0	0	0	0	0	1	0	0	0	0	0	0	0.0594796	0.197026	0.315985	1	8	0	0	0	0	0	0	27	0	1	0	8
A0A0B4J2D9	117	0.307692	0.0940171	0.299145	0.0683761	0.0598291	0.0683761	0.0769231	0.025641	205.527	35.0453	484.632	0.181368	3.11026	0	0	0	0	0	0	0	0	0	0	0	0	0	0	0	0	0	1	1	0.0762712	0.279661	0	1	2	0	0	0	0	0	0	15	0	0	0	0
A0A0B4J2E0	115	0.304348	0.0956522	0.226087	0.113043	0.104348	0.0608696	0.0521739	0.0434783	212.51	32.4304	441.322	0.160261	3.40748	0	0	0	0	0	0	0	0	0	0	0	0	0	0	0	0	0	1	1	0	0	0	1	6	0	0	0	0	0	0	17	1	0	0	1
A0A0B4J2E2	113	0.336283	0.0707965	0.247788	0.106195	0.0707965	0.0619469	0.0442478	0.0619469	209.607	26.2681	470.035	0.150619	3.16655	0	0	0	0	0	0	0	0	0	0	0	0	0	0	0	0	0	1	1	0	0	0	1	2	0	0	0	0	0	0	13	1	0	0	0
A0A0B4J2E5	919	0.300326	0.100109	0.212187	0.133841	0.126224	0.031556	0.0772579	0.0184984	212.406	34.2536	472.876	0.0622089	3.34565	3.37323	0	0	0	31	0	0	0	1	0	0	0	0	0	0	0	0	2	1	0.0315217	0.21413	0.353261	0	31	0	0	0	0	0	0	124	1	0	0	1
A0A0B4J2F0	54	0.333333	0.12963	0.185185	0.148148	0.12963	0.0185185	0.0555556	0	221.302	27.913	468.444	0.0318519	3.7113	0	44.4444	0	0	0	24	0	0	0	1	0	0	0	0	1	0.381818	0.963636	0	0	0	0.436364	0	0	0	0	0	0	0	0	0	9	1	0	0	1
A0A0B4J2F2	783	0.314176	0.063857	0.220945	0.113665	0.0932312	0.0893997	0.0804598	0.0242656	209.784	36.3825	475.701	0.062848	3.18195	5.36398	0	0	0	42	0	0	0	1	0	0	0	11	6	0	0	0	2	2	0.122449	0.327806	0.543367	0	26	0	0	10	0	0	0	118	1	0	0	0
A0A0B4J2H0	117	0.316239	0.119658	0.273504	0.0854701	0.0683761	0.025641	0.0940171	0.017094	205.282	36.5402	484.786	0.00786325	3.14974	0	0	0	0	0	0	0	0	0	0	0	0	0	0	0	0	0	1	1	0.0847458	0.398305	0.457627	1	8	0	0	0	0	0	0	15	2	0	1	0
A0A0C4DFX4	3053	0.29643	0.0324271	0.229938	0.114314	0.116934	0.136915	0.0635441	0.00949885	208.289	37.1887	482.394	-0.0406191	3.06436	58.4998	1.04815	0	0	1786	32	0	0	15	1	0	0	56	47	0	0	0	3	3	0.367714	0.694499	0.771775	0	17	0	0	0	0	0	0	567	0	0	0	0
A0A0C4DG82	528	0.289773	0.102273	0.238636	0.149621	0.113636	0.0284091	0.0606061	0.0170455	217.493	33.9479	468.888	0.100398	3.47847	23.1061	12.6894	0	0	122	67	0	0	2	2	0	0	6	3	4	0.170132	0.996219	2	2	0.0888469	0.275992	0.37051	0	2	0	0	0	0	0	0	124	2	0	0	0
A0A0C4DGL5	57	0.210526	0.105263	0.192982	0.210526	0.105263	0.0877193	0.0526316	0.0350877	215.385	38.8509	450.211	-0.125439	3.39053	0	0	0	0	0	0	0	0	0	0	0	0	1	0	0	0	0	1	1	0.224138	0	0	0	0	0	0	0	0	0	0	0	0	1	0	0
A0A0C4DGX1	222	0.297297	0.108108	0.198198	0.0945946	0.108108	0.0855856	0.0855856	0.0225225	207.172	35.1505	465.212	-0.0263964	3.24608	0	0	0	0	0	0	0	0	0	0	0	0	0	0	0	0	0	0	0	0.0807175	0	0	0	9	0	0	0	0	0	0	34	0	0	0	0
A0A0C4DH24	114	0.263158	0.0964912	0.333333	0.0877193	0.0701754	0.0701754	0.0614035	0.0175439	207.719	33.5912	475.579	0.174825	3.1986	0	0	0	0	0	0	0	0	0	0	0	0	0	0	0	0	0	1	1	0	0	0	1	5	0	0	0	0	0	0	24	2	1	0	0
A0A0C4DH25	116	0.293103	0.103448	0.293103	0.0517241	0.0862069	0.0775862	0.0775862	0.0172414	204.618	35.2	487.086	0.21	3.13259	0	0	0	0	0	0	0	0	0	0	0	0	1	0	0	0	0	1	1	0.0769231	0	0	1	3	0	0	0	0	0	0	24	1	0	1	0
A0A0C4DH26	115	0.286957	0.113043	0.286957	0.0782609	0.0695652	0.0695652	0.0782609	0.0173913	206.748	32.5426	474.183	0.134261	3.22348	0	0	0	0	0	0	0	0	0	0	0	0	0	0	0	0	0	1	1	0	0.258621	0	1	5	0	0	0	0	0	0	21	0	1	1	0
A0A0C4DH27	118	0.313559	0.110169	0.237288	0.135593	0.0932203	0.0423729	0.0508475	0.0169492	215.707	32.7653	477.627	0.127797	3.45254	0	0	0	0	0	0	0	0	0	0	0	0	0	0	0	0	0	1	1	0.117647	0	0	1	1	0	0	0	0	0	0	17	1	1	1	0
A0A0C4DH28	118	0.288136	0.110169	0.271186	0.110169	0.0932203	0.0254237	0.0847458	0.0169492	211.415	32.7347	477.212	0.130678	3.32305	0	0	0	0	0	0	0	0	0	0	0	0	0	0	0	0	0	1	1	0	0	0	1	5	0	0	0	0	0	0	16	0	1	1	0
A0A0C4DH29	117	0.307692	0.119658	0.273504	0.128205	0.0598291	0.017094	0.0769231	0.017094	210.505	37.3538	472.103	0.015812	3.31556	0	0	0	0	0	0	0	0	0	0	0	0	1	0	0	0	0	1	1	0	0	0	1	9	0	0	0	0	0	0	17	2	0	1	0
A0A0C4DH30	117	0.290598	0.111111	0.222222	0.145299	0.0769231	0.017094	0.111111	0.025641	213.624	39.8709	477.556	0.00846154	3.35667	0	0	0	0	0	0	0	0	0	0	0	0	0	0	0	0	0	1	1	0	0.40678	0	1	7	0	0	0	0	0	0	20	0	0	0	0
A0A0C4DH31	117	0.307692	0.119658	0.299145	0.0940171	0.0598291	0.017094	0.0854701	0.017094	206.767	35.141	477.607	0.0644444	3.21034	0	0	0	0	0	0	0	0	0	0	0	0	1	0	0	0	0	1	1	0.0847458	0.228814	0	1	9	0	0	0	0	0	0	17	1	0	0	0
A0A0C4DH32	117	0.307692	0.111111	0.213675	0.102564	0.0854701	0.017094	0.136752	0.025641	205.958	37.5026	487.923	0.0489744	3.14761	0	0	0	0	0	0	0	0	0	0	0	0	0	0	0	0	0	1	1	0	0.254237	0	1	3	0	0	0	0	0	0	16	1	0	0	0
A0A0C4DH33	117	0.307692	0.0940171	0.239316	0.102564	0.119658	0.025641	0.0854701	0.025641	207.884	32.3991	473.564	-0.00384615	3.19778	0	0	0	0	0	0	0	0	0	0	0	0	1	0	0	0	0	1	1	0	0	0	1	5	0	0	0	0	0	0	20	2	1	0	0
A0A0C4DH34	117	0.299145	0.145299	0.282051	0.0940171	0.042735	0.0512821	0.0683761	0.017094	210.147	33.8581	472.248	0.214701	3.42949	0	0	0	0	0	0	0	0	0	0	0	0	0	0	0	0	0	1	1	0.101695	0	0	1	7	0	0	0	0	0	0	17	1	0	0	0
A0A0C4DH35	117	0.299145	0.111111	0.25641	0.102564	0.0769231	0.017094	0.111111	0.025641	207.765	37.4316	480.923	0.0676923	3.21068	0	0	0	0	0	0	0	0	0	0	0	0	0	0	0	0	0	1	1	0	0.254237	0	1	7	0	0	0	0	0	0	16	1	1	0	0
A0A0C4DH36	116	0.301724	0.112069	0.267241	0.103448	0.0603448	0.0172414	0.112069	0.0258621	210.062	36.6466	483.569	0.0943966	3.25578	0	0	0	0	0	0	0	0	0	0	0	0	0	0	0	0	0	1	1	0	0.376068	0	1	6	0	0	0	0	0	0	16	0	0	0	0
A0A0C4DH38	117	0.324786	0.111111	0.247863	0.0854701	0.0683761	0.034188	0.102564	0.025641	206.025	32.3949	484.034	0.124957	3.17222	0	0	0	0	0	0	0	0	0	0	0	0	0	0	0	0	0	1	1	0	0.305085	0	1	5	0	0	0	0	0	0	17	3	0	0	0
A0A0C4DH39	117	0.316239	0.111111	0.282051	0.111111	0.0683761	0.017094	0.0769231	0.017094	210.905	37.3239	470.085	0.0376068	3.32325	0	0	0	0	0	0	0	0	0	0	0	0	0	0	0	0	0	1	1	0	0	0	1	9	0	0	0	0	0	0	12	2	0	1	0
A0A0C4DH41	118	0.288136	0.135593	0.29661	0.0932203	0.0423729	0.0508475	0.0762712	0.0169492	209.182	34.1025	481.686	0.19322	3.33847	0	0	0	0	0	0	0	0	0	0	0	0	0	0	0	0	0	1	1	0.12605	0.302521	0.705882	1	3	0	0	0	0	0	0	19	1	0	0	0
A0A0C4DH42	116	0.318966	0.12069	0.25	0.0862069	0.0689655	0.0172414	0.103448	0.0344828	207.928	34.3328	483.483	0.100259	3.22578	0	0	0	0	0	0	0	0	0	0	0	0	0	0	0	0	0	1	1	0	0	0	1	6	0	0	0	0	0	0	17	1	1	0	0
A0A0C4DH43	119	0.319328	0.0840336	0.302521	0.10084	0.0840336	0.0504202	0.0336134	0.0252101	214.784	30.7739	467.605	0.261513	3.39723	0	0	0	0	0	0	0	0	0	0	0	0	0	0	0	0	0	1	1	0	0	0.4	1	9	0	0	0	0	0	0	24	0	0	0	0
A0A0C4DH55	119	0.260504	0.12605	0.310924	0.0672269	0.0672269	0.0840336	0.0672269	0.0168067	206.635	35.8429	466.353	0.221597	3.28664	0	0	0	0	0	0	0	0	0	0	0	0	0	0	0	0	0	1	1	0.116667	0	0	1	4	0	0	0	0	0	0	26	1	0	0	0
A0A0C4DH58	137	0.350365	0.0729927	0.233577	0.0948905	0.080292	0.0510949	0.080292	0.0364964	209.076	31.0883	471.343	0.0567883	3.15372	0	0	0	0	0	0	0	0	0	0	0	0	0	0	0	0	0	2	2	0	0	0	0	5	0	0	0	0	0	0	0	1	1	3	0
A0A0C4DH59	114	0.263158	0.105263	0.298246	0.0701754	0.0701754	0.0526316	0.105263	0.0350877	207.3	34.2316	470.465	0.165526	3.21412	0	0	0	0	0	0	0	0	0	0	0	0	0	0	0	0	0	1	1	0.121739	0.217391	0	1	3	0	0	0	0	0	0	9	2	0	0	1
A0A0C4DH62	17	0.235294	0.176471	0.352941	0.0588235	0.0588235	0	0.117647	0	201.469	37.9176	462	0.09	3.30471	0	0	0	0	0	0	0	0	0	0	0	0	0	0	0	0	0	0	0	0	0	0	0	1	0	0	0	0	0	0	3	1	2	0	0
A0A0C4DH63	20	0.3	0.05	0.15	0.2	0.05	0.05	0.2	0	217.011	27.815	520.7	0.165	3.181	0	0	0	0	0	0	0	0	0	0	0	0	0	0	0	0	0	0	0	0	0	0	0	0	0	0	0	0	0	0	2	0	0	0	0
A0A0C4DH67	115	0.286957	0.121739	0.304348	0.0782609	0.0347826	0.0608696	0.0782609	0.0347826	207.473	36.087	477.243	0.198783	3.2127	0	0	0	0	0	0	0	0	0	0	0	0	0	0	0	0	0	1	1	0.0775862	0	0	1	2	0	0	0	0	0	0	19	0	0	0	0
A0A0C4DH68	120	0.308333	0.0833333	0.283333	0.0833333	0.0583333	0.075	0.0916667	0.0166667	208.178	36.7392	471.292	0.19475	3.21233	0	0	0	0	0	0	0	0	0	0	0	0	0	0	0	0	0	1	1	0.0909091	0	0	1	5	0	0	0	0	0	0	23	1	1	0	0
A0A0C4DH69	117	0.307692	0.102564	0.299145	0.0683761	0.0512821	0.0683761	0.0769231	0.025641	207.283	34.4359	479.547	0.213504	3.19607	0	0	0	0	0	0	0	0	0	0	0	0	0	0	0	0	0	1	1	0.0762712	0	0	1	5	0	0	0	0	0	0	18	1	0	0	0
A0A0C4DH72	117	0.307692	0.0940171	0.282051	0.0769231	0.0598291	0.0683761	0.0854701	0.025641	207.229	34.7359	477.077	0.178632	3.17256	0	0	0	0	0	0	0	0	0	0	0	0	0	0	0	0	0	1	1	0.0762712	0	0	1	6	0	0	0	0	0	0	17	0	0	1	0
A0A0C4DH73	117	0.290598	0.102564	0.316239	0.0683761	0.0512821	0.0683761	0.0769231	0.025641	205.168	36.1564	474.769	0.174103	3.14188	0	0	0	0	0	0	0	0	0	0	0	0	0	0	0	0	0	1	1	0.059322	0	0	1	2	0	0	0	0	0	0	17	0	0	0	0
A0A0C4DH90	116	0.301724	0.103448	0.310345	0.0517241	0.0689655	0.0775862	0.0689655	0.0172414	205.339	34.9216	479.603	0.220603	3.1681	0	0	0	0	0	0	0	0	0	0	0	0	0	0	0	0	0	1	1	0.196581	0	0	1	3	0	0	0	0	0	0	25	0	0	0	0
A0A0C5B5G6	16	0.25	0.25	0.0625	0.25	0.0625	0.0625	0.0625	0	241.303	43.7938	359.938	0.258125	4.83625	0	0	0	0	0	0	0	0	0	0	0	0	0	0	0	0	0	0	0	0	0	0	0	0	0	0	0	0	0	0	1	0	0	1	0
A0A0D9SEW6	157	0.305732	0.127389	0.159236	0.101911	0.089172	0.0700637	0.0828025	0.0573248	206.873	32.9359	461.827	0.0783333	3.23904	0	0	0	0	0	0	0	0	0	0	0	0	0	0	0	0	0	0	0	0	0	0	0	2	0	0	0	0	0	0	23	1	0	1	0
A0A0D9SF12	145	0.303448	0.103448	0.275862	0.0896552	0.0689655	0.062069	0.062069	0.0344828	212.043	32.2841	465.441	0.208966	3.38662	0	24.1379	0	0	0	35	0	0	0	1	0	0	0	0	1	0.143836	0.986301	0	0	0.116438	0.349315	0	0	5	0	0	0	0	0	0	16	5	2	1	4
A0A0D9SFI3	127	0.141732	0.0314961	0.354331	0.15748	0.204724	0.0472441	0.0629921	0	209.252	33.2724	488.543	-0.278346	3.00189	100	0	0	0	127	0	0	0	1	0	0	0	4	3	0	0	0	0	0	0.609375	0.679688	0.679688	0	0	0	0	0	0	0	0	12	3	0	2	0
A0A0D9SG24	43	0.302326	0.0465116	0.116279	0.255814	0.116279	0.139535	0.0232558	0	237.785	40.593	431.721	0.034186	4.01977	0	0	0	0	0	0	0	0	0	0	0	0	0	0	0	0	0	0	0	0	0.636364	0	0	2	0	0	0	0	0	0	12	0	0	0	0
A0A0D9SG40	211	0.459716	0.109005	0.165877	0.0995261	0.0521327	0.042654	0.0379147	0.028436	216.299	31.0138	458.848	0.45881	3.57395	0	0	0	0	0	0	0	0	0	0	0	0	0	0	5	0.509434	0.990566	0	0	0.122642	0.198113	0.34434	0	1	0	0	0	0	0	0	0	0	0	0	0
A0A0D9SG42	100	0.23	0.08	0.17	0.07	0.02	0.26	0.16	0.01	194.522	41.362	479.87	0.2102	2.8468	48	0	0	0	48	0	0	0	1	0	0	0	2	1	0	0	0	0	0	0.50495	0.80198	0.861386	0	2	0	0	0	0	0	0	0	0	0	0	0
A0A0D9SG52	128	0.328125	0.0703125	0.210938	0.171875	0.125	0.0234375	0	0.0703125	222.596	32.7242	440.25	0.0674219	3.57297	0	0	0	0	0	0	0	0	0	0	0	0	0	0	0	0	0	1	1	0	0.20155	0	0	0	0	0	0	0	0	0	10	2	1	0	2
A0A0D9SGE1	29	0.310345	0.0344828	0.103448	0.103448	0.137931	0.103448	0.137931	0.0689655	207.235	34.0655	466.172	0.12931	3.07793	0	0	0	0	0	0	0	0	0	0	0	0	0	0	0	0	0	0	0	0	0	0	0	0	0	0	0	0	0	0	0	1	0	0	0
A0A0D9SGH0	206	0.26699	0.101942	0.223301	0.121359	0.131068	0.0485437	0.0776699	0.0242718	212.684	36.2107	454.541	0.115463	3.39844	0	0	0	0	0	0	0	0	0	0	0	0	3	3	1	0.111111	0.990338	0	0	0.0821256	0	0	0	8	0	0	0	0	0	0	79	0	1	0	0
A0A0D9SGI3	237	0.274262	0.07173	0.206751	0.160338	0.177215	0.0295359	0.0421941	0.0379747	215.725	27.8987	473.869	-0.128734	3.29266	20.6751	8.01688	0	0	49	19	0	0	1	1	0	0	3	2	0	0	0	1	1	0.12605	0.159664	0.319328	0	4	0	0	0	0	0	0	0	5	0	0	0
A0A0D9SGJ0	62	0.33871	0.0806452	0.16129	0.16129	0.112903	0.0322581	0.0322581	0.0806452	216.711	26.95	455.516	0.0403226	3.35097	0	0	0	0	0	0	0	0	0	0	0	0	0	0	0	0	0	1	1	0	0	0	0	2	0	0	0	0	0	0	0	0	0	1	0
A0A0G2JK05	382	0.340314	0.0628272	0.191099	0.109948	0.0732984	0.078534	0.0968586	0.0471204	207.508	38.033	474.893	0.0470942	3.10259	0	0	0	0	0	0	0	0	0	0	0	0	0	0	2	0.104439	0.994778	1	1	0.0835509	0.078329	0	1	20	0	0	0	0	0	0	48	1	0	0	0
A0A0G2JKD1	596	0.209732	0.0234899	0.57047	0.0369128	0.0520134	0.0201342	0.0855705	0.00167785	189.216	37.748	535.228	0.146644	2.28344	74.3289	0	0	0	443	0	0	0	2	0	0	0	5	2	1	0.038526	0.99665	12	2	0.758794	0.907873	0.805695	1	3	0	0	0	0	0	0	70	4	0	0	1
A0A0G2JKS1	128	0.335938	0.046875	0.148438	0.148438	0.0390625	0.132812	0.078125	0.0703125	211.313	40.7563	470.023	0.131719	3.14148	0	0	0	0	0	0	0	0	0	0	0	0	0	0	0	0	0	0	0	0.139535	0.248062	0.503876	1	4	0	0	0	0	0	0	18	0	2	0	4
A0A0G2JKW9	36	0.166667	0.0555556	0.0833333	0.0555556	0.0555556	0.333333	0.25	0	185.599	41.9917	499.722	-0.0677778	2.55694	100	0	0	0	36	0	0	0	1	0	0	0	1	1	0	0	0	0	0	0	0.972973	0	0	1	0	0	0	0	0	0	5	2	0	0	0
A0A0G2JLE6	195	0.102564	0.0153846	0.297436	0.0923077	0.0205128	0.0974359	0.0205128	0.353846	214.928	28.8538	384.651	-0.193949	2.85241	0	0	0	0	0	0	0	0	0	0	0	0	0	0	0	0	0	0	0	0.770408	0.979592	0.979592	0	11	0	0	0	0	0	0	7	2	3	0	1
A0A0G2JLG4	411	0.274939	0.119221	0.240876	0.143552	0.0851582	0.0462287	0.053528	0.0364964	216.007	30.4766	456.998	0.126715	3.4891	0	0	0	0	0	0	0	0	0	0	0	0	0	0	1	0.0509709	0.995146	0	0	0.0339806	0.0339806	0	0	3	0	0	0	0	0	0	59	2	0	0	0
A0A0G2JLJ8	7	0.571429	0	0.285714	0	0.142857	0	0	0	208.056	24.6	482.429	0.175714	2.99714	0	0	0	0	0	0	0	0	0	0	0	0	0	0	0	0	0	0	0	0	0	0	0	0	0	0	0	0	0	0	1	0	0	0	0
A0A0G2JLL6	359	0.253482	0.0222841	0.200557	0.111421	0.119777	0.16156	0.114206	0.0167131	200.144	38.5852	487.058	-0.192451	2.7776	82.4513	0	0	0	296	0	0	0	2	0	0	0	5	5	1	0.0666667	0.994444	0	0	0.222222	0.75	0.919444	0	4	0	0	0	0	0	0	52	0	0	0	0
A0A0G2JLM5	398	0.253769	0.0929648	0.248744	0.130653	0.0904523	0.080402	0.0829146	0.0201005	209.105	36.8555	462.927	0.116231	3.26153	7.53769	0	0	0	30	0	0	0	1	0	0	0	1	0	1	0.0551378	0.994987	3	1	0.0401003	0.157895	0	1	18	0	0	0	0	0	0	53	4	0	1	0
A0A0G2JLQ3	304	0.263158	0.0921053	0.243421	0.131579	0.0986842	0.0723684	0.0789474	0.0197368	209.557	36.6697	462.253	0.110164	3.27628	9.86842	0	0	0	30	0	0	0	1	0	0	0	1	0	1	0.0721311	0.993443	2	1	0	0.12459	0	1	16	0	0	0	0	0	0	32	1	0	1	0
A0A0G2JLW4	131	0.267176	0.0610687	0.236641	0.122137	0.145038	0.0763359	0.0458015	0.0458015	217.22	30.6733	455.023	0.0734351	3.41962	0	0	0	0	0	0	0	0	0	0	0	0	1	0	0	0	0	0	0	0.0984848	0.227273	0	0	3	0	0	0	0	0	0	16	2	2	0	0
A0A0G2JM45	476	0.35084	0.0735294	0.193277	0.140756	0.102941	0.0546218	0.0273109	0.0567227	222.478	30.1792	448.065	0.211807	3.61685	0	0	0	0	0	0	0	0	0	0	0	0	0	0	0	0	0	0	0	0.0587002	0.146751	0.419287	0	3	0	0	0	0	0	0	98	1	0	0	0
A0A0G2JMD5	474	0.333333	0.0991561	0.189873	0.14346	0.103376	0.0632911	0.035865	0.0316456	221.074	32.2869	449.553	0.233143	3.68059	0	0	0	0	0	0	0	0	0	0	0	0	0	0	0	0	0	0	0	0	0	0	0	3	0	0	0	0	0	0	95	1	0	0	0
A0A0G2JMH3	177	0.265537	0.107345	0.220339	0.158192	0.0508475	0.0621469	0.112994	0.0225989	210.293	36.1446	476.655	0.182147	3.28983	0	0	0	0	0	0	0	0	0	0	0	0	0	0	0	0	0	1	1	0	0	0	0	6	0	0	0	0	0	0	33	3	0	0	3
A0A0G2JMI3	117	0.324786	0.102564	0.222222	0.0940171	0.128205	0.025641	0.0769231	0.025641	208.054	30.2624	472.915	0.00452991	3.22957	0	0	0	0	0	0	0	0	0	0	0	0	1	0	0	0	0	1	1	0	0	0	1	4	0	0	0	0	0	0	18	2	1	0	0
A0A0G2JMM0	328	0.280488	0.0945122	0.204268	0.131098	0.0945122	0.0823171	0.0884146	0.0243902	208.706	37.1232	465.43	0.0828659	3.25534	0	0	0	0	0	0	0	0	0	0	0	0	0	0	0	0	0	5	2	0	0	0	1	25	0	0	0	0	0	0	52	4	0	1	0
A0A0G2JMP0	313	0.415335	0.127796	0.188498	0.086262	0.0670927	0.0415335	0.0351438	0.0383387	214.028	29.9256	454.923	0.408211	3.53898	0	0	0	0	0	0	0	0	0	0	0	0	0	0	7	0.487261	0.993631	1	1	0.0636943	0.11465	0	0	1	0	0	0	0	0	0	43	0	1	0	0
A0A0G2JMS6	1433	0.293091	0.117934	0.272156	0.0956036	0.107467	0.0390789	0.0586183	0.0160502	212.196	29.0163	463.015	0.115443	3.41138	0	0	0	0	0	0	0	0	0	0	0	0	0	0	0	0	0	3	3	0.00906555	0	0	0	46	0	0	0	0	0	0	254	1	0	1	0
A0A0G2JMZ2	1700	0.261765	0.0517647	0.282941	0.118824	0.124706	0.106471	0.0411765	0.0123529	212.466	31.0335	459.839	0.0459588	3.28011	55.2353	0	0	0	939	0	0	0	6	0	0	0	25	23	1	0.0141093	0.998824	8	2	0.0970018	0.383892	0.659612	1	14	0	0	0	0	0	0	290	0	0	0	2
A0A0G2JN01	328	0.280488	0.0945122	0.204268	0.131098	0.0945122	0.0823171	0.0884146	0.0243902	208.605	37.054	464.064	0.0903049	3.25665	0	0	0	0	0	0	0	0	0	0	0	0	0	0	0	0	0	5	2	0	0	0	1	25	0	0	0	0	0	0	51	4	0	1	1
A0A0G2JN53	185	0.308108	0.0108108	0.221622	0.162162	0.102703	0.12973	0.0540541	0.0108108	213.056	39.933	473.546	-0.142703	3.14459	65.9459	11.3514	0	0	122	21	0	0	1	1	0	0	2	2	0	0	0	0	0	0.38172	0.446237	0.983871	0	1	0	0	0	0	0	0	16	3	0	0	0
A0A0G2JN68	375	0.272	0.0746667	0.261333	0.128	0.0773333	0.0906667	0.072	0.024	208.283	37.7397	465.672	0.102507	3.17019	17.8667	0	0	0	67	0	0	0	1	0	0	0	4	2	1	0.0585106	0.994681	0	0	0.0664894	0.117021	0.226064	1	12	0	0	0	0	0	0	59	5	2	0	0
A0A0G2JND7	137	0.343066	0.0948905	0.167883	0.167883	0.116788	0.0656934	0.0291971	0.0145985	218.233	31.3453	428.248	0.214526	3.68438	0	0	0	0	0	0	0	0	0	0	0	0	0	0	0	0	0	0	0	0	0	0	0	1	0	0	0	0	0	0	14	3	1	0	0
A0A0G2JNF4	349	0.260745	0.0859599	0.246418	0.13467	0.0974212	0.0830946	0.0687679	0.0229226	210.726	36.0046	458.788	0.0740115	3.29287	0	0	0	0	0	0	0	0	0	0	0	0	2	1	1	0.0457143	0.994286	0	0	0.0342857	0.128571	0	1	15	0	0	0	0	0	0	52	2	4	1	1
A0A0G2JNG1	304	0.263158	0.0953947	0.240132	0.128289	0.101974	0.0723684	0.0789474	0.0197368	209.079	36.5151	460.066	0.116974	3.2823	9.86842	0	0	0	30	0	0	0	1	0	0	0	1	0	1	0.0721311	0.993443	2	1	0.052459	0.108197	0	1	13	0	0	0	0	0	0	32	1	0	1	0
A0A0G2JNH3	316	0.443038	0.120253	0.158228	0.0981013	0.0506329	0.0411392	0.0506329	0.0379747	215.067	32.1709	448.709	0.426392	3.57551	0	0	0	0	0	0	0	0	0	0	0	0	0	0	7	0.479495	0.993691	1	1	0.129338	0.119874	0.236593	0	0	0	0	0	0	0	0	24	1	0	0	1
A0A0G2JNJ9	132	0.257576	0.0984848	0.265152	0.181818	0.0454545	0.0606061	0.0681818	0.0227273	217.686	37.1788	459.72	0.181742	3.48682	0	0	0	0	0	0	0	0	0	0	0	0	0	0	0	0	0	0	0	0	0	0	0	3	0	0	0	0	0	0	19	3	1	0	0
A0A0G2JNQ3	293	0.255973	0.0511945	0.238908	0.16041	0.174061	0.0341297	0.0819113	0.00341297	212.081	28.5587	486.358	-0.201741	3.14109	35.8362	0	0	0	105	0	0	0	2	0	0	0	5	4	0	0	0	1	1	0.319728	0.479592	0.493197	0	6	0	0	0	0	0	0	25	1	0	0	0
A0A0G2JP20	478	0.353556	0.083682	0.194561	0.135983	0.100418	0.0523013	0.0292887	0.0502092	221.906	30.1805	447.889	0.223619	3.63529	0	0	0	0	0	0	0	0	0	0	0	0	0	0	0	0	0	0	0	0.0584551	0.0793319	0.45929	0	3	0	0	0	0	0	0	99	1	0	1	0
A0A0G2JPC4	375	0.274667	0.0746667	0.256	0.128	0.0773333	0.0933333	0.072	0.024	208.077	37.8221	465.861	0.0972533	3.16624	17.8667	0	0	0	67	0	0	0	1	0	0	0	4	2	1	0.0585106	0.994681	0	0	0.0664894	0.117021	0.226064	1	14	0	0	0	0	0	0	59	5	2	0	0
A0A0G2JPF8	293	0.259386	0.0477816	0.221843	0.167235	0.174061	0.0307167	0.0887372	0.0102389	213.304	28.8382	487.754	-0.21116	3.14986	41.6382	5.11945	0	0	122	15	0	0	2	1	0	0	7	4	0	0	0	1	1	0.238095	0.44898	0.513605	0	5	0	0	0	0	0	0	24	0	0	0	0
A0A0G2JPN4	36	0.166667	0.111111	0.388889	0.0833333	0.0833333	0.111111	0.0277778	0.0277778	205.99	28.0194	457.083	0.00111111	3.16528	0	0	0	0	0	0	0	0	0	0	0	0	1	1	0	0	0	0	0	0	0	0	0	0	0	0	0	0	0	0	5	5	2	2	0
A0A0G2JPS5	147	0.29932	0.0816327	0.244898	0.108844	0.0816327	0.0680272	0.0884354	0.0272109	207.334	35.9769	456.429	0.0673469	3.22531	0	0	0	0	0	0	0	0	0	0	0	0	0	0	0	0	0	0	0	0	0.168919	0	1	4	0	0	0	0	0	0	20	5	1	0	0
A0A0G2JQF1	25	0.08	0.16	0.32	0.12	0.16	0.08	0.08	0	213.521	39.528	444.4	-0.1232	3.5984	0	0	0	0	0	0	0	0	0	0	0	0	0	0	0	0	0	0	0	0	0	0	0	0	0	0	0	0	0	0	1	3	0	1	0
A0A0G2JQZ4	141	0.248227	0.0496454	0.134752	0.177305	0.0567376	0.163121	0.148936	0.0212766	208.531	53.334	482.291	-0.177021	3.03617	83.6879	0	0	0	118	0	0	0	1	0	0	0	3	3	0	0	0	0	0	0.225352	0.859155	0.992958	0	2	0	0	0	0	0	0	30	1	0	0	0
A0A0G2JRQ6	117	0.290598	0.0940171	0.307692	0.0769231	0.0598291	0.0683761	0.0769231	0.025641	207.99	34.4547	477.068	0.181282	3.18991	0	0	0	0	0	0	0	0	0	0	0	0	0	0	0	0	0	1	1	0.0762712	0	0	1	5	0	0	0	0	0	0	19	0	1	1	0
A0A0G2JS06	123	0.268293	0.105691	0.317073	0.0894309	0.0569106	0.0569106	0.0813008	0.0243902	207.941	35.1244	485.911	0.200407	3.18756	0	0	0	0	0	0	0	0	0	0	0	0	0	0	0	0	0	1	1	0.0483871	0.33871	0.33871	1	4	0	0	0	0	0	0	25	3	0	2	0
A0A0G2JS52	829	0.236429	0.0446321	0.249698	0.147165	0.154403	0.0759952	0.0615199	0.0301568	211.793	31.2836	471.291	-0.0882871	3.15076	39.807	9.16767	0	0	330	76	0	0	4	1	0	0	22	15	0	0	0	2	1	0.0951807	0.255422	0.214458	0	18	0	0	0	0	0	0	91	2	0	0	0
A0A0J9YVP2	21	0.190476	0.333333	0.238095	0.047619	0.047619	0	0.0952381	0	207.702	23.84	434.35	0.199	3.944	0	0	0	0	0	0	0	0	0	0	0	0	0	0	0	0	0	0	0	0.318182	0	0	0	0	0	0	0	0	0	0	4	1	3	1	1
A0A0J9YVP9	17	0.176471	0.176471	0.352941	0	0.0588235	0.0588235	0.117647	0	197.502	38.1562	452.75	0.211875	3.30313	0	0	0	0	0	0	0	0	0	0	0	0	0	0	0	0	0	0	0	0	0	0	0	0	0	0	0	0	0	0	2	1	2	0	1
A0A0J9YVQ7	164	0.237805	0.0792683	0.268293	0.158537	0.0853659	0.0304878	0.128049	0.00609756	207.741	42.7178	496.945	-0.0170552	3.04362	24.3902	0	0	0	40	0	0	0	1	0	0	0	1	1	0	0	0	1	1	0.327273	0.357576	0.357576	0	3	0	0	0	0	0	0	36	3	0	0	0
A0A0J9YVS3	16	0.1875	0.25	0.3125	0	0.0625	0	0.125	0	199.566	33.32	464.4	0.206	3.46933	0	0	0	0	0	0	0	0	0	0	0	0	0	0	0	0	0	0	0	0	0	0	0	0	0	0	0	0	0	0	3	1	2	0	1
A0A0J9YVX5	310	0.329032	0.0387097	0.151613	0.16129	0.154839	0.0387097	0.112903	0.0129032	214.175	32.1797	489.345	-0.0846129	3.19816	0	0	0	0	0	0	0	0	0	0	0	0	4	2	0	0	0	2	2	0	0.186495	0.257235	0	6	0	0	0	0	0	0	60	1	1	0	0
A0A0J9YVY3	117	0.307692	0.136752	0.282051	0.0854701	0.0512821	0.025641	0.0854701	0.025641	206.19	34.8017	474.291	0.105214	3.2459	0	0	0	0	0	0	0	0	0	0	0	0	0	0	0	0	0	1	1	0	0	0	1	7	0	0	0	0	0	0	20	1	0	0	0
A0A0J9YW14	17	0.294118	0.117647	0.294118	0	0.117647	0	0.117647	0	192.999	34.9375	463.25	0.108125	2.95688	0	0	0	0	0	0	0	0	0	0	0	0	0	0	0	0	0	0	0	0	0	0	0	0	0	0	0	0	0	0	1	0	0	0	1
A0A0J9YW22	9	0.444444	0.333333	0	0.111111	0.111111	0	0	0	234.591	37.1667	419.111	0.583333	4.92778	0	0	0	0	0	0	0	0	0	0	0	0	0	0	0	0	0	0	0	0	0	0	0	0	0	0	0	0	0	0	1	0	0	0	0
A0A0J9YW53	1432	0.291899	0.118715	0.272346	0.0956704	0.106145	0.0391061	0.0593575	0.0167598	212.116	29.1131	462.793	0.116648	3.41024	0	0	0	0	0	0	0	0	0	0	0	0	0	0	0	0	0	3	3	0	0	0	0	45	0	0	0	0	0	0	0	0	0	1	0
A0A0J9YW62	118	0.313559	0.110169	0.237288	0.144068	0.0762712	0.0254237	0.0762712	0.0169492	214.084	35.0085	472.924	0.0533051	3.39924	0	0	0	0	0	0	0	0	0	0	0	0	0	0	0	0	0	1	1	0	0	0	0	4	0	0	0	0	0	0	21	3	0	1	0
A0A0J9YW81	582	0.350515	0.0756014	0.235395	0.14433	0.0773196	0.0274914	0.0738832	0.0154639	213.616	34.6991	476.619	0.154313	3.29598	11.8557	6.70103	0	0	69	39	0	0	2	1	0	0	5	4	6	0.205832	0.996569	1	1	0.169811	0.241852	0.161235	0	5	0	0	0	0	0	0	72	9	2	0	0
A0A0J9YWD0	10	0.5	0.3	0	0.1	0.1	0	0	0	237.187	35.01	438	0.727	4.935	0	0	0	0	0	0	0	0	0	0	0	0	0	0	0	0	0	0	0	0	0	0	0	0	0	0	0	0	0	0	2	0	0	0	0
A0A0J9YWL9	993	0.287009	0.0372608	0.227593	0.165156	0.10574	0.113797	0.0513595	0.0120846	212.725	31.8303	452.761	-0.02428	3.27924	72.1047	3.82679	0	0	716	38	0	0	5	1	0	0	11	7	0	0	0	0	0	0.0160966	0.227364	0.857143	0	7	0	28	0	0	0	0	117	4	0	0	0
A0A0J9YWN2	18	0.222222	0.277778	0.222222	0.0555556	0.0555556	0	0.111111	0	209.9	41.1118	453.824	0.321176	3.9	0	0	0	0	0	0	0	0	0	0	0	0	0	0	0	0	0	0	0	0	0	0	0	0	0	0	0	0	0	0	4	1	2	0	1
A0A0J9YWP8	17	0.235294	0.176471	0.294118	0	0.0588235	0	0.176471	0	195.381	34.9813	492.875	0.308125	3.09813	0	0	0	0	0	0	0	0	0	0	0	0	0	0	0	0	0	0	0	0	0	0	0	0	0	0	0	0	0	0	5	1	2	0	0
A0A0J9YWU9	116	0.284483	0.146552	0.293103	0.0862069	0.0431034	0.0517241	0.0775862	0.0172414	209.422	32.7302	476.112	0.241552	3.39379	0	0	0	0	0	0	0	0	0	0	0	0	0	0	0	0	0	1	1	0.102564	0.299145	0	1	8	0	0	0	0	0	0	19	1	0	0	0
A0A0J9YWX1	270	0.203704	0.0666667	0.174074	0.174074	0.0703704	0.114815	0.148148	0.0481481	210.354	47.8937	475.867	-0.109	3.08537	22.963	0	0	0	62	0	0	0	1	0	0	0	4	1	0	0	0	0	0	0.287823	0.538745	0.686347	0	11	0	0	0	0	0	0	0	1	0	0	0
A0A0J9YWX3	18	0.166667	0.111111	0.388889	0.111111	0	0.0555556	0.111111	0	206.276	39.5118	475.118	0.371765	3.16294	0	0	0	0	0	0	0	0	0	0	0	0	0	0	0	0	0	0	0	0	0	0	0	1	0	0	0	0	0	0	4	1	1	0	0
A0A0J9YWY2	1419	0.292459	0.116984	0.273432	0.0958421	0.106413	0.0394644	0.0584919	0.0169133	212.148	29.1246	462.708	0.114327	3.40624	0	0	0	0	0	0	0	0	0	0	0	0	0	0	0	0	0	3	3	0	0	0	0	45	0	0	0	0	0	0	0	0	0	0	0
A0A0J9YX06	16	0.1875	0.1875	0.3125	0.0625	0	0	0.1875	0	202.307	39.3267	502.467	0.226	3.154	0	0	0	0	0	0	0	0	0	0	0	0	0	0	0	0	0	0	0	0	0	0	0	0	0	0	0	0	0	0	3	1	1	0	0
A0A0J9YX35	117	0.316239	0.119658	0.25641	0.0940171	0.0769231	0.017094	0.0940171	0.025641	207.762	33.759	485.983	0.101624	3.23154	0	0	0	0	0	0	0	0	0	0	0	0	0	0	0	0	0	1	1	0	0.211864	0	1	4	0	0	0	0	0	0	20	1	1	0	0
A0A0J9YX57	407	0.255528	0.0589681	0.248157	0.149877	0.132678	0.0589681	0.0810811	0.014742	212.11	34.6007	489.686	-0.103243	3.1458	47.4201	0	0	0	193	0	0	0	1	0	0	0	9	6	0	0	0	1	1	0.0196078	0.370098	0.634804	0	4	0	0	0	0	0	0	60	0	0	0	0
A0A0J9YX75	114	0.298246	0.105263	0.254386	0.0964912	0.0701754	0.0526316	0.0877193	0.0350877	206.722	34.4149	462.588	0.125965	3.20509	0	0	0	0	0	0	0	0	0	0	0	0	0	0	0	0	0	1	1	0	0	0	1	2	0	0	0	0	0	0	10	2	1	0	0
A0A0J9YX94	578	0.33218	0.0432526	0.134948	0.100346	0.17474	0.0605536	0.143599	0.0103806	201.775	39.1574	508.09	-0.228356	2.84649	47.4048	0	0	0	274	0	0	0	2	0	0	0	5	4	0	0	0	0	0	0.364421	0.602763	0.702936	0	9	0	0	0	0	0	0	53	2	0	0	0
A0A0J9YXA8	16	0.25	0.125	0.3125	0.0625	0.0625	0	0.125	0	206.139	40.3133	492.067	0.0906667	3.15933	0	0	0	0	0	0	0	0	0	0	0	0	0	0	0	0	0	0	0	0	0	0	0	1	0	0	0	0	0	0	2	0	1	0	0
A0A0J9YXG2	191	0.26178	0.0575916	0.209424	0.151832	0.109948	0.104712	0.0628272	0.0418848	213.375	33.5435	452.974	0.0662304	3.28702	0	0	0	0	0	0	0	0	0	0	0	0	2	0	0	0	0	1	1	0	0	0	0	8	0	0	0	0	0	0	48	4	2	0	0
A0A0J9YXG5	17	0.235294	0.117647	0.352941	0.0588235	0.0588235	0	0.117647	0	206.033	30.1313	512.125	0.39875	3.16438	0	0	0	0	0	0	0	0	0	0	0	0	0	0	0	0	0	0	0	0	0	0	0	0	0	0	0	0	0	0	2	1	1	0	0
A0A0J9YXM7	17	0.176471	0.0588235	0.352941	0.117647	0.0588235	0.0588235	0.117647	0	209.349	40.1688	454.688	0.20875	3.17687	0	0	0	0	0	0	0	0	0	0	0	0	1	1	0	0	0	0	0	0	0	0	0	0	0	0	0	0	0	0	2	1	0	0	0
A0A0J9YXN1	9	0.555556	0.222222	0	0	0.111111	0	0.111111	0	214.401	31.3	490.333	0.838889	4.08333	0	0	0	0	0	0	0	0	0	0	0	0	0	0	0	0	0	0	0	0	0	0	0	0	0	0	0	0	0	0	1	4	0	2	0
A0A0J9YXQ4	647	0.35085	0.0510046	0.125193	0.0880989	0.140649	0.057187	0.174652	0.0123648	196.381	40.2873	524.015	-0.220788	2.67515	39.7218	0	0	0	257	0	0	0	3	0	0	0	7	6	0	0	0	0	0	0.376543	0.513889	0.575617	0	14	0	0	0	0	0	0	56	1	1	0	1
A0A0J9YXS1	232	0.331897	0.0775862	0.172414	0.181034	0.116379	0.0517241	0.0560345	0.00862069	217.644	31.5407	483.442	0.00402597	3.41745	0	0	0	0	0	0	0	0	0	0	0	0	0	0	0	0	0	1	1	0	0	0	0	4	0	0	0	0	0	0	32	2	0	1	0
A0A0J9YXV3	536	0.244403	0.0802239	0.152985	0.113806	0.0410448	0.134328	0.225746	0.00746269	196.305	40.8106	503.739	-0.0598321	2.768	53.3582	0	0	0	286	0	0	0	4	0	0	0	14	12	0	0	0	0	0	0.134078	0.517691	0.851024	1	10	0	0	0	0	0	0	44	2	0	2	0
A0A0J9YXX1	117	0.316239	0.111111	0.264957	0.0940171	0.0683761	0.034188	0.0854701	0.025641	207.004	33.4701	479.111	0.130427	3.20829	0	0	0	0	0	0	0	0	0	0	0	0	0	0	0	0	0	1	1	0	0.220339	0	1	6	0	0	0	0	0	0	18	3	0	0	0
A0A0J9YXY3	114	0.307018	0.114035	0.236842	0.0964912	0.0614035	0.0438596	0.105263	0.0350877	207.472	32.2333	471.211	0.177895	3.24851	0	0	0	0	0	0	0	0	0	0	0	0	0	0	0	0	0	1	1	0	0	0	1	3	0	0	0	0	0	0	12	2	1	0	0
A0A0J9YY54	714	0.235294	0.0560224	0.231092	0.145658	0.116246	0.110644	0.0840336	0.0210084	212.106	38.7611	455.989	-0.127241	3.24444	65.8263	4.62185	0	0	470	33	0	0	4	1	0	0	18	18	0	0	0	1	1	0.0601399	0.248951	0.552448	0	10	0	0	0	0	0	0	94	0	1	0	0
A0A0J9YY76	178	0.258427	0.0280899	0.202247	0.168539	0.168539	0.123596	0.0505618	0	220.364	34.5775	466.118	-0.165225	3.43152	60.6742	0	0	0	108	0	0	0	1	0	0	0	6	6	0	0	0	1	1	0.458101	0.675978	0.893855	0	0	0	0	0	0	0	0	28	0	0	0	0
A0A0J9YY99	117	0.307692	0.136752	0.222222	0.111111	0.0683761	0.017094	0.111111	0.025641	209.303	36.1744	480.188	0.0565812	3.31325	0	0	0	0	0	0	0	0	0	0	0	0	0	0	0	0	0	1	1	0	0.313559	0.313559	1	1	0	0	0	0	0	0	17	1	1	0	0
A0A0J9YYE9	177	0.316384	0.107345	0.231638	0.112994	0.107345	0.0508475	0.0451977	0.0225989	212.622	33.5165	466.034	0.0141477	3.40159	0	0	0	0	0	0	0	0	0	0	0	0	0	0	1	0.123596	0.988764	1	1	0.0955056	0	0	0	7	0	0	0	0	0	0	17	0	1	0	0
A0A0J9YYG4	354	0.347458	0.0903955	0.183616	0.124294	0.127119	0.0536723	0.0649718	0.00847458	211.921	29.7246	472.489	0.147655	3.35709	0	0	0	0	0	0	0	0	0	0	0	0	0	0	0	0	0	0	0	0.0760563	0.0760563	0.174648	0	6	0	0	0	0	0	0	58	0	0	0	0
A0A0J9YYH6	164	0.128049	0.103659	0.27439	0.134146	0.176829	0.0365854	0.134146	0.0121951	205.185	38.0537	483.512	-0.143902	3.04567	0	0	0	0	0	0	0	0	0	0	0	0	2	2	0	0	0	0	0	0.333333	0.606061	0.606061	0	1	0	0	0	0	0	0	0	0	0	0	0
A0A0K0K1A3	114	0.254386	0.114035	0.280702	0.140351	0.0964912	0.0175439	0.0701754	0.0263158	213.127	36.693	450.518	0.115439	3.42596	0	0	0	0	0	0	0	0	0	0	0	0	1	0	0	0	0	1	1	0	0	0	1	4	0	0	0	0	0	0	19	2	1	0	0
A0A0K0K1A5	114	0.315789	0.0964912	0.280702	0.0701754	0.0614035	0.0526316	0.0877193	0.0350877	205.206	32.8947	464.351	0.173333	3.1586	0	0	0	0	0	0	0	0	0	0	0	0	0	0	0	0	0	1	1	0.0869565	0	0	1	2	0	0	0	0	0	0	9	2	1	0	0
A0A0K0K1B3	111	0.324324	0.108108	0.288288	0.0720721	0.045045	0.0540541	0.0810811	0.027027	209.488	35.2297	478.252	0.276937	3.30414	0	0	0	0	0	0	0	0	0	0	0	0	0	0	0	0	0	1	1	0.0982143	0	0	1	3	0	0	0	0	0	0	12	1	0	0	0
A0A0K0K1C0	115	0.347826	0.0869565	0.208696	0.0956522	0.130435	0.0434783	0.0521739	0.0347826	212.038	31.3252	471.887	0.0646087	3.33443	0	0	0	0	0	0	0	0	0	0	0	0	0	0	0	0	0	1	1	0	0	0	1	3	0	0	0	0	0	0	14	2	0	0	0
A0A0K0K1C4	114	0.289474	0.0964912	0.254386	0.105263	0.0789474	0.0701754	0.0789474	0.0263158	214.04	28.9693	460.947	0.143596	3.41482	0	0	0	0	0	0	0	0	0	0	0	0	0	0	0	0	0	1	1	0	0	0	1	5	0	0	0	0	0	0	25	2	1	0	0
A0A0K0K1D8	114	0.289474	0.105263	0.298246	0.0877193	0.0701754	0.0438596	0.0701754	0.0350877	208.913	31.8947	463.219	0.146491	3.26833	0	0	0	0	0	0	0	0	0	0	0	0	1	0	0	0	0	1	1	0	0	0	1	4	0	0	0	0	0	0	11	2	1	0	0
A0A0K0K1E9	115	0.243478	0.104348	0.278261	0.113043	0.0956522	0.0521739	0.0869565	0.026087	211.104	37.0496	466.817	0.049913	3.29226	0	0	0	0	0	0	0	0	0	0	0	0	1	0	0	0	0	1	1	0	0	0	1	5	0	0	0	0	0	0	18	3	0	0	0
A0A0K0K1G6	114	0.236842	0.122807	0.254386	0.149123	0.105263	0.0263158	0.0789474	0.0263158	214.65	35.6281	450.325	0.104912	3.47965	0	0	0	0	0	0	0	0	0	0	0	0	0	0	0	0	0	1	1	0	0	0	1	6	0	0	0	0	0	0	23	3	1	0	0
A0A0K0K1G8	114	0.27193	0.140351	0.245614	0.131579	0.0877193	0.0263158	0.0701754	0.0263158	213.932	37.2596	452.772	0.125965	3.50772	0	0	0	0	0	0	0	0	0	0	0	0	0	0	0	0	0	1	1	0	0	0	1	7	0	0	0	0	0	0	19	2	1	0	0
A0A0K2S4Q6	201	0.318408	0.0746269	0.248756	0.079602	0.0845771	0.079602	0.0746269	0.039801	208.611	33.4512	473.264	0.15791	3.1895	0	0	0	0	0	0	0	0	0	0	0	0	0	0	1	0.108911	0.990099	1	1	0.0742574	0.376238	0.381188	1	8	0	0	0	0	0	0	10	0	0	0	0
A0A0M3HER8	536	0.244403	0.0261194	0.201493	0.173507	0.238806	0.0429104	0.0541045	0.0186567	226.637	33.9244	460.603	-0.252201	3.58562	25.5597	16.9776	0	0	137	91	0	0	3	3	0	0	10	5	0	0	0	0	0	0.515829	0.685289	0.685289	0	0	0	0	0	0	0	0	53	2	0	0	1
A0A0R4J2E8	847	0.239669	0.0625738	0.225502	0.16647	0.158205	0.0602125	0.0767414	0.0106257	215.139	31.7919	470.733	-0.0719362	3.30653	30.5785	2.47934	0	0	259	21	0	0	4	1	0	0	15	9	0	0	0	3	2	0.139151	0.451651	0.604953	0	7	0	0	0	0	0	0	111	1	3	1	0
A0A0U1RQB9	7	0.714286	0	0.142857	0	0.142857	0	0	0	205.237	25.2714	495.571	0.0542857	2.91143	0	0	0	0	0	0	0	0	0	0	0	0	0	0	0	0	0	0	0	0	0	0	0	0	0	0	0	0	0	0	0	0	0	0	0
A0A0U1RQE8	302	0.301325	0.0993377	0.231788	0.13245	0.102649	0.0463576	0.0629139	0.0231788	216.821	29.8722	454.467	0.124934	3.52142	0	0	0	0	0	0	0	0	0	0	0	0	0	0	0	0	0	2	2	0	0	0	0	7	0	0	0	0	0	0	37	0	0	0	0
A0A0U1RQF3	1178	0.292869	0.0373514	0.163837	0.106112	0.101868	0.0840407	0.195246	0.0186757	198.617	45.6737	513.152	-0.21736	2.68739	51.8676	0	0	0	611	0	0	0	8	0	0	0	29	21	0	0	0	0	0	0.131467	0.72095	0.939779	0	10	0	0	0	0	0	0	0	3	0	1	0
A0A0U1RQF7	123	0.276423	0.0569106	0.170732	0.186992	0.0894309	0.097561	0.097561	0.0243902	213.314	41.9976	474.87	-0.123008	3.19805	46.3415	0	0	0	57	0	0	0	1	0	0	0	5	4	0	0	0	0	0	0.241935	0.403226	0	0	2	0	0	0	0	0	0	16	2	1	0	0
A0A0U1RQG5	324	0.308642	0.0216049	0.111111	0.111111	0.299383	0.0617284	0.0864198	0	207.668	31.1997	491.775	-0.382315	3.03463	66.6667	0	0	0	216	0	0	0	2	0	0	0	4	3	0	0	0	0	0	0.513846	0.843077	0.935385	0	1	0	0	0	0	0	0	30	1	1	0	0
A0A0U1RQI7	1052	0.205323	0.0465779	0.464829	0.0484791	0.0665399	0.0209125	0.109316	0.0380228	203.673	28.0465	455.897	0.207357	2.94571	15.1141	0	0	0	159	0	0	0	2	0	0	0	7	6	0	0	0	3	1	0	0.723647	0.747388	0	41	0	0	0	0	0	0	68	0	0	0	0
A0A0U1RQK0	76	0.328947	0.0921053	0.302632	0.105263	0.0789474	0.0131579	0.0789474	0	209.118	32.9184	498.487	0.120132	3.18237	0	0	0	0	0	0	0	0	0	0	0	0	0	0	0	0	0	1	1	0.220779	0	0	0	2	0	0	0	0	0	0	0	1	2	0	0
A0A0U1RQK1	487	0.199179	0.0759754	0.190965	0.268994	0.12115	0.026694	0.0554415	0.0616016	226.651	34.5162	436.224	-0.106489	3.6171	0	0	0	0	0	0	0	0	0	0	0	0	3	0	0	0	0	13	2	0.022541	0	0	0	6	0	0	0	0	0	0	40	3	0	1	0
A0A0U1RQM0	116	0.241379	0.0603448	0.241379	0.206897	0.0862069	0.0689655	0.0862069	0.00862069	216.807	37.0353	498.552	-0.170862	3.21319	48.2759	0	0	0	56	0	0	0	1	0	0	0	4	4	0	0	0	0	0	0.111111	0.34188	0.504274	0	0	0	0	0	0	0	0	22	2	0	2	2
A0A0U1RQS6	177	0.412429	0.0225989	0.146893	0.0734463	0.0564972	0.129944	0.107345	0.0508475	195.229	41.7678	523.751	-0.080452	2.53989	20.339	0	0	0	36	0	0	0	1	0	0	0	1	1	2	0.247191	0.988764	0	0	0.516854	0.949438	0.988764	0	4	0	0	0	0	0	0	23	0	0	0	0
A0A0U1RQV1	116	0.275862	0.0431034	0.25	0.103448	0.0948276	0.0948276	0.103448	0.0344828	207.516	32.8759	464.103	0.0387931	3.07233	38.7931	0	0	0	45	0	0	0	1	0	0	0	4	2	0	0	0	0	0	0	0	0	0	0	0	0	0	0	0	0	16	0	0	0	5
A0A0U1RQV5	110	0.327273	0.0545455	0.290909	0.0818182	0.109091	0.0363636	0.0727273	0.0272727	208.184	34.3191	483.855	0.067	3.082	0	0	0	0	0	0	0	0	0	0	0	0	0	0	0	0	0	0	0	0	0	0	0	8	0	0	0	0	0	0	22	2	1	0	0
A0A0U1RR11	272	0.283088	0.0551471	0.147059	0.213235	0.0919118	0.0808824	0.0845588	0.0441176	216.915	46.521	471.989	-0.247022	3.25408	25	0	0	0	68	0	0	0	2	0	0	0	2	1	0	0	0	1	1	0.25641	0.461538	0.435897	0	13	0	0	0	0	0	0	32	3	0	0	0
A0A0U1RR37	186	0.295699	0.0698925	0.188172	0.112903	0.177419	0.0913978	0.0591398	0.00537634	206.848	34.6919	480.64	-0.180914	3.14382	63.4409	0	0	0	118	0	0	0	3	0	0	0	4	4	0	0	0	0	0	0.283422	0.534759	0.59893	0	0	0	0	0	0	0	0	17	1	1	0	1
A0A0U1RRA0	63	0.428571	0.0793651	0.111111	0.15873	0.031746	0.0634921	0.111111	0.015873	215.813	45.0238	490.857	-0.0152381	3.36175	0	0	0	0	0	0	0	0	0	0	0	0	0	0	1	0.34375	0.96875	0	0	0.265625	0.578125	0	0	0	0	0	0	0	0	0	6	0	0	0	0
A0A0U1RRE5	68	0.191176	0.0294118	0.191176	0.147059	0.0735294	0.235294	0.102941	0.0294118	203.109	39.1603	481.971	-0.0942647	2.855	100	0	0	0	68	0	0	0	1	0	0	0	3	3	0	0	0	0	0	0.246377	0.550725	0.898551	0	0	0	0	0	0	0	0	12	0	0	0	1
A0A0U1RRH7	170	0.358824	0.0411765	0.170588	0.217647	0.0588235	0.0647059	0.0882353	0	218.968	41.6124	503.835	-0.0551176	3.28159	0	0	0	0	0	0	0	0	0	0	0	0	0	0	0	0	0	2	2	0.128655	0.292398	0.251462	0	6	0	0	0	0	0	0	17	2	0	0	1
A0A0U1RRI6	287	0.30662	0.0557491	0.135889	0.198606	0.097561	0.0766551	0.087108	0.0418118	214.234	45.731	476.509	-0.240348	3.19394	37.9791	0	0	0	109	0	0	0	3	0	0	0	2	2	0	0	0	1	1	0.302083	0.489583	0.472222	0	14	0	0	0	0	0	0	35	3	0	0	0
A0A0U1RRK4	108	0.287037	0.0185185	0.157407	0.0925926	0.12963	0.166667	0.12963	0.0185185	194.96	42.262	513.583	-0.307407	2.56019	100	0	0	0	108	0	0	0	1	0	0	0	1	1	0	0	0	1	1	0.440367	0.853211	0.963303	0	0	0	0	0	0	0	0	19	0	0	0	0
A0A0U1RRL7	71	0.169014	0.056338	0.253521	0.056338	0.084507	0.28169	0.084507	0.0140845	201.457	39.2366	424.859	-0.180986	3.09662	90.1408	0	0	0	64	0	0	0	1	0	0	0	2	2	0	0	0	0	0	0.611111	0.611111	0.611111	0	0	0	0	0	0	0	0	10	1	0	0	0
A0A0U1RRN3	59	0.338983	0.118644	0.152542	0.118644	0.101695	0.0677966	0.0847458	0.0169492	218.996	35.2831	427.661	0.231186	3.79593	0	0	0	0	0	0	0	0	0	0	0	0	0	0	1	0.3	0.966667	0	0	0	0	0	0	4	0	0	0	0	0	0	5	0	0	0	3
A0A0X1KG70	313	0.415335	0.127796	0.188498	0.086262	0.0702875	0.0415335	0.0319489	0.0383387	214.033	29.6086	454.649	0.401278	3.54179	0	0	0	0	0	0	0	0	0	0	0	0	0	0	7	0.487261	0.993631	1	1	0.0636943	0.11465	0	0	2	0	0	0	0	0	0	42	0	1	0	0
A0A0X1KG71	628	0.353503	0.0684713	0.167197	0.138535	0.13535	0.0605096	0.0589172	0.0175159	215.517	32.3669	478.78	0.0675159	3.38223	6.52866	0	0	0	41	0	0	0	1	0	0	0	4	2	0	0	0	0	0	0.17965	0.324324	0.430843	0	10	0	0	0	0	0	0	104	1	1	0	0
A0A0X1KG74	233	0.244635	0.0729614	0.253219	0.184549	0.137339	0.0429185	0.0472103	0.0171674	220.811	32.6768	438.639	0.0772103	3.57318	17.5966	0	0	0	41	0	0	0	1	0	0	0	3	3	0	0	0	1	1	0	0	0	0	2	0	0	0	0	0	0	27	2	1	0	0
A0A0X1KG78	248	0.314516	0.0645161	0.221774	0.129032	0.108871	0.0604839	0.0806452	0.0201613	209.513	39.7149	474.956	-0.0295968	3.1754	16.9355	0	0	0	42	0	0	0	1	0	0	0	4	3	0	0	0	3	1	0.0441767	0.293173	0.670683	0	6	0	0	0	0	0	0	26	5	2	2	0
A0A140T8X8	626	0.20607	0.0223642	0.576677	0.0351438	0.0527157	0.0191693	0.086262	0.00159744	188.768	37.7272	536.615	0.144058	2.26165	75.5591	0	0	0	473	0	0	0	2	0	0	0	5	2	1	0.0366826	0.99681	11	2	0.770335	0.912281	0.814992	1	3	0	0	0	0	0	0	74	4	0	0	2
A0A140T963	221	0.375566	0.0904977	0.153846	0.171946	0.140271	0.00904977	0.0497738	0.00904977	221.639	29.3475	478.059	0.0424887	3.60828	0	9.50226	0	0	0	21	0	0	0	1	0	0	1	0	1	0.0990991	0.990991	0	0	0.0900901	0.445946	0.828829	0	1	0	0	0	0	0	0	35	2	0	0	0
A0A140TA40	1061	0.326107	0.0791706	0.175306	0.136664	0.110273	0.0838831	0.0697455	0.0188501	213.219	38.0426	465.286	0.0244298	3.37593	1.88501	2.82752	0	0	20	30	0	0	1	1	0	0	6	2	0	0	0	2	2	0.0649718	0.211864	0.329567	0	34	0	0	0	0	0	0	150	1	0	0	0
A0A140TA45	1061	0.326107	0.0782281	0.175306	0.137606	0.110273	0.0838831	0.0697455	0.0188501	213.317	38.1015	465.552	0.0223563	3.37409	1.88501	2.82752	0	0	20	30	0	0	1	1	0	0	6	2	0	0	0	2	2	0.0649718	0.211864	0.329567	0	33	0	0	0	0	0	0	150	1	0	0	0
A0A140TA62	436	0.272936	0.0458716	0.300459	0.116972	0.142202	0.0366972	0.0275229	0.0573394	219.778	28.0424	457.344	0.00630734	3.38408	0	65.1376	0	0	0	284	0	0	0	3	0	0	0	0	0	0	0	1	1	0.0343249	0.130435	0.745995	0	10	0	0	0	0	0	0	39	3	1	0	0
A0A140TA64	210	0.1	0.00952381	0.280952	0.104762	0.0190476	0.1	0.0190476	0.366667	217.565	30.589	378.61	-0.182	2.90567	0	0	0	0	0	0	0	0	0	0	0	0	0	0	0	0	0	0	0	0.758294	0.990521	0.990521	0	14	0	0	0	0	0	0	5	0	0	0	0
A0A140TA67	174	0.0804598	0.0344828	0.362069	0.0574713	0.00574713	0.109195	0.0344828	0.316092	210.101	28.1828	386.506	-0.0464368	2.82	0	0	0	0	0	0	0	0	0	0	0	0	0	0	0	0	0	0	0	0.731429	0.988571	0.988571	0	3	0	0	0	0	0	0	12	0	2	0	0
A0A182DWH4	266	0.274436	0.109023	0.229323	0.135338	0.0977444	0.0413534	0.093985	0.018797	213.688	37.7244	466.962	0.0404887	3.41139	0	0	0	0	0	0	0	0	0	0	0	0	0	0	1	0.0636704	0.992509	1	1	0.071161	0.071161	0	0	12	0	0	0	0	0	0	38	1	0	0	0
A0A183	80	0.1125	0.0375	0.2875	0.2	0.0875	0.1375	0.05	0.0875	220.145	36.4813	431.363	-0.245375	3.32063	0	0	0	0	0	0	0	0	0	0	0	0	0	0	0	0	0	0	0	0	0.407407	0	0	3	0	0	0	0	0	0	9	1	2	1	0
A0A191URI9	304	0.269737	0.0888158	0.240132	0.131579	0.105263	0.0690789	0.0756579	0.0197368	209.643	35.9543	460.99	0.0966118	3.27704	0	0	0	0	0	0	0	0	0	0	0	0	2	0	1	0.0721311	0.993443	2	1	0.0622951	0.108197	0	1	14	0	0	0	0	0	0	35	1	0	1	0
A0A1B0GTB2	48	0.416667	0.0625	0.208333	0.0625	0.166667	0	0.0833333	0	213.734	23.4583	472.354	0.282917	3.36771	0	0	0	0	0	0	0	0	0	0	0	0	0	0	1	0.44898	0.959184	0	0	0.285714	0.44898	0	0	1	0	0	0	0	0	0	5	2	1	0	0
A0A1B0GTC6	90	0.366667	0.122222	0.244444	0.1	0.1	0.0333333	0.0222222	0.0111111	214.376	29.2189	448.856	0.230778	3.58333	0	0	0	0	0	0	0	0	0	0	0	0	0	0	0	0	0	0	0	0	0	0	1	1	0	0	0	0	0	0	12	1	4	1	3
A0A1B0GTD5	131	0.221374	0.129771	0.274809	0.175573	0.0916031	0.0763359	0.0229008	0.00763359	222.033	35.1015	421.031	0.170992	3.80275	0	0	0	0	0	0	0	0	0	0	0	0	0	0	0	0	0	0	0	0	0	0	0	2	0	0	0	0	0	0	15	3	0	0	1
A0A1B0GTE1	492	0.29065	0.109756	0.229675	0.132114	0.0833333	0.054878	0.0914634	0.00813008	210.95	36.5577	472.862	0.123638	3.34734	0	0	0	0	0	0	0	0	0	0	0	0	0	0	0	0	0	3	2	0.0831643	0.160243	0.15213	1	14	0	0	0	0	0	0	100	2	0	2	0
A0A1B0GTG1	560	0.314286	0.0517857	0.173214	0.167857	0.158929	0.0607143	0.0607143	0.0125	220.568	38.775	471.907	-0.206446	3.44338	18.75	21.25	0	0	105	119	0	0	2	2	0	0	7	5	0	0	0	1	1	0.196078	0.4082	0.73262	0	13	0	0	0	0	0	0	59	0	0	0	1
A0A1B0GTG8	36	0.388889	0.166667	0.277778	0.0555556	0.0277778	0.0555556	0.0277778	0	204.941	32.8	444.944	0.473611	3.50583	0	0	0	0	0	0	0	0	0	0	0	0	0	0	1	0.459459	0.945946	0	0	0	0	0	0	0	0	0	0	0	0	0	2	1	1	0	1
A0A1B0GTH6	734	0.234332	0.0762943	0.370572	0.143052	0.0490463	0.0776567	0.0286104	0.020436	214.753	33.6048	462.929	0.178365	3.34083	4.90463	0	0	0	36	0	0	0	1	0	0	0	8	5	0	0	0	0	0	0.0816327	0.246259	0.365986	0	45	0	0	0	0	0	0	103	4	3	0	0
A0A1B0GTH9	108	0.287037	0.0648148	0.166667	0.212963	0.0833333	0.0925926	0.037037	0.0555556	224.018	34.4954	449.991	-0.0457407	3.54343	0	0	0	0	0	0	0	0	0	0	0	0	0	0	0	0	0	0	0	0	0.192661	0	0	5	0	0	0	0	0	0	7	1	0	0	2
A0A1B0GTI1	187	0.256684	0.0374332	0.283422	0.149733	0.117647	0.0962567	0.0588235	0	214.133	39.1936	474.599	-0.082139	3.23471	72.1925	0	0	0	135	0	0	0	3	0	0	0	4	4	0	0	0	0	0	0.132979	0.0691489	0.835106	0	1	0	0	0	0	0	0	24	0	2	1	0
A0A1B0GTI8	121	0.380165	0.165289	0.140496	0.0991736	0.115702	0.0413223	0.0247934	0.0330579	218.091	31.4603	445.24	0.278264	3.81496	0	0	0	0	0	0	0	0	0	0	0	0	0	0	2	0.393443	0.983607	0	0	0.467213	0.483607	0	0	0	0	0	0	0	0	0	15	1	0	0	0
A0A1B0GTJ5	212	0.382075	0.132075	0.20283	0.0896226	0.0707547	0.0283019	0.0660377	0.0283019	207.884	35.3684	470.755	0.300849	3.36854	0	0	0	0	0	0	0	0	0	0	0	0	0	0	5	0.492958	0.99061	1	1	0.0610329	0.230047	0.497653	0	3	0	0	0	0	0	0	29	1	0	0	2
A0A1B0GTJ6	334	0.218563	0.0898204	0.227545	0.158683	0.0778443	0.143713	0.0688623	0.0149701	212.938	42.6572	458.734	-0.0210778	3.34407	24.2515	0	0	0	81	0	0	0	2	0	0	0	5	5	0	0	0	0	0	0.104478	0.0716418	0.232836	0	7	0	0	0	0	0	0	62	5	0	1	0
A0A1B0GTK4	181	0.303867	0.0883978	0.226519	0.154696	0.0939227	0.0331492	0.0662983	0.0331492	217.629	34.568	458.912	0.148508	3.4895	0	0	0	0	0	0	0	0	0	0	0	0	0	0	0	0	0	0	0	0	0	0	0	4	0	0	0	0	0	0	34	3	0	0	0
A0A1B0GTK5	79	0.291139	0.101266	0.164557	0.126582	0.101266	0.101266	0.0886076	0.0253165	211.104	40.4823	476.051	0.0172152	3.28608	0	0	0	0	0	0	0	0	0	0	0	0	0	0	0	0	0	0	0	0	0	0	0	2	0	0	0	0	0	0	17	1	0	0	1
A0A1B0GTL2	189	0.343915	0.0529101	0.148148	0.232804	0.0529101	0.0634921	0.0846561	0.021164	221.234	51.2921	488.196	-0.0915344	3.35989	0	0	0	0	0	0	0	0	0	0	0	0	1	1	0	0	0	0	0	0.410526	0.521053	0.752632	1	7	0	0	0	0	0	0	30	1	1	0	1
A0A1B0GTQ1	180	0.333333	0.0944444	0.15	0.144444	0.116667	0.0833333	0.0666667	0.0111111	216.624	39.5467	472.8	0.0118333	3.48394	0	0	0	0	0	0	0	0	0	0	0	0	0	0	0	0	0	0	0	0	0	0	1	7	0	0	0	0	0	0	32	1	1	0	0
A0A1B0GTQ4	84	0.428571	0.0238095	0.119048	0.190476	0.0833333	0.0833333	0.047619	0.0238095	228.466	43.8821	484.417	0.2225	3.62179	0	0	0	0	0	0	0	0	0	0	0	0	0	0	0	0	0	0	0	0.435294	0.658824	0.964706	1	1	0	0	0	0	0	0	5	3	0	0	0
A0A1B0GTR0	161	0.298137	0.0807453	0.180124	0.161491	0.111801	0.068323	0.0496894	0.0496894	220.746	28.6	452.273	0.217888	3.56826	0	0	0	0	0	0	0	0	0	0	0	0	0	0	0	0	0	0	0	0.0802469	0	0	1	4	0	0	0	0	0	0	35	0	0	0	2
A0A1B0GTR3	108	0.166667	0.00925926	0.259259	0.296296	0.111111	0.0740741	0.0833333	0	227.58	37.2019	499.602	-0.301481	3.32917	80.5556	0	0	0	87	0	0	0	1	0	0	0	4	2	0	0	0	0	0	0.293578	0.431193	0.807339	0	0	0	1	0	0	1	0	12	0	1	0	0
A0A1B0GTR4	108	0.0277778	0.00925926	0.324074	0.0740741	0.00925926	0.351852	0	0.203704	214.269	24.7519	349.139	-0.337222	3.18398	0	0	0	0	0	0	0	0	0	0	0	0	0	0	0	0	0	0	0	0.926606	0.926606	0.926606	0	6	0	0	0	0	0	0	5	0	1	0	0
A0A1B0GTS1	333	0.228228	0.0690691	0.297297	0.132132	0.123123	0.0720721	0.0660661	0.012012	213.256	33.6979	460.985	-0.0171772	3.28748	39.6396	0	0	0	132	0	0	0	2	0	0	0	8	7	0	0	0	0	0	0.0778443	0.0778443	0.179641	0	8	0	0	0	0	0	0	47	4	0	0	0
A0A1B0GTS7	73	0.273973	0.0547945	0.273973	0.178082	0.0821918	0.0410959	0.0547945	0.0410959	214.734	32.8466	500.767	0.089863	3.17014	0	0	0	0	0	0	0	0	0	0	0	0	0	0	0	0	0	0	0	0	0	0	0	2	0	0	0	0	0	0	0	4	0	0	0
A0A1B0GTU1	805	0.255901	0.0298137	0.257143	0.16646	0.154037	0.0695652	0.0496894	0.0173913	217.245	30.4539	479.487	-0.134957	3.25761	53.7888	0	0	0	433	0	0	0	5	0	0	0	24	20	0	0	0	2	1	0.155087	0.369727	0.528536	0	10	0	0	5	0	0	0	122	0	0	0	0
A0A1B0GTU2	59	0.389831	0.101695	0.118644	0.0677966	0.169492	0.0847458	0.0169492	0.0508475	212.354	25.4763	432.492	0.142881	3.5178	0	0	0	0	0	0	0	0	0	0	0	0	0	0	1	0.316667	0.966667	0	0	0.183333	0	0	0	4	0	0	0	0	0	0	12	0	1	0	0
A0A1B0GTW0	35	0.542857	0.114286	0.114286	0.0571429	0.0285714	0.0285714	0.0857143	0.0285714	207.381	30.8171	464.743	0.586286	3.39857	0	0	0	0	0	0	0	0	0	0	0	0	0	0	1	0.611111	0.944444	0	0	0	0	0	0	0	0	0	0	0	0	0	3	1	0	0	0
A0A1B0GTW7	788	0.303299	0.0659898	0.225888	0.121827	0.0786802	0.0774112	0.0901015	0.036802	209.551	36.1423	474.581	0.118959	3.17565	0	0	0	0	0	0	0	0	0	0	0	0	2	1	1	0.0253485	0.997465	0	0	0.12294	0.30545	0.245881	1	38	0	0	0	0	0	0	22	4	3	1	0
A0A1B0GTZ2	297	0.26936	0.0538721	0.259259	0.178451	0.154882	0.030303	0.0505051	0.003367	224.007	25.3663	462.394	0.0455892	3.58599	13.468	20.202	0	0	40	60	0	0	1	2	0	0	6	4	0	0	0	0	0	0	0.513423	0.697987	0	7	0	0	0	0	0	0	35	1	3	1	7
A0A1B0GTY3	106	0.245283	0.0660377	0.245283	0.122642	0.0849057	0.122642	0.0471698	0.0660377	214.355	36.3	455.34	-0.0190566	3.27368	0	0	0	0	0	0	0	0	0	0	0	0	0	0	0	0	0	0	0	0	0	0	0	6	0	0	0	0	0	0	123	0	0	0	0
A0A1B0GTY4	177	0.288136	0.129944	0.169492	0.20339	0.0847458	0.039548	0.039548	0.0451977	224.282	28.5876	444.881	0.173446	3.79345	0	0	0	0	0	0	0	0	0	0	0	0	1	0	1	0.117978	0.988764	0	0	0.247191	0.308989	0	1	1	0	0	0	0	0	0	25	3	0	0	0
A0A1B0GU03	582	0.305842	0.080756	0.202749	0.109966	0.0876289	0.0945017	0.0876289	0.0309278	207.471	33.5335	475.88	0.0451546	3.14424	5.6701	0	0	0	33	0	0	0	1	0	0	0	2	2	1	0.0343053	0.996569	1	1	0.0891938	0.231561	0.164666	1	15	0	0	0	0	0	0	71	2	0	0	3
A0A1B0GU08	178	0.174157	0.0842697	0.370787	0.117978	0.0505618	0.123596	0.0674157	0.011236	201.348	37.2202	455.562	0.135562	3.01152	89.3258	0	0	0	159	0	0	0	2	0	0	0	5	4	0	0	0	0	0	0.0502793	0.424581	0.916201	0	0	0	0	0	0	0	0	0	1	3	0	0
A0A1B0GU29	152	0.269737	0.0921053	0.210526	0.0657895	0.111842	0.138158	0.0855263	0.0263158	205.82	34.2474	471.309	0.165987	3.21388	0	0	0	0	0	0	0	0	0	0	0	0	0	0	1	0.137255	0.986928	0	0	0.137255	0.320261	0.54902	0	7	0	0	0	0	0	0	27	0	0	0	0
A0A1B0GU33	70	0.214286	0.0714286	0.242857	0.242857	0.0428571	0.0857143	0.0428571	0.0571429	223.62	40.7843	418.229	0.151	3.59786	0	0	0	0	0	0	0	0	0	0	0	0	1	1	0	0	0	0	0	0	0	0	0	4	0	0	0	0	0	0	5	0	0	0	0
A0A1B0GU69	56	0.25	0.107143	0.214286	0.142857	0.107143	0.0535714	0.0892857	0.0357143	221.224	34.5804	445.375	0.0983929	3.62786	0	0	0	0	0	0	0	0	0	0	0	0	1	0	0	0	0	0	0	0	0	0	0	3	0	0	0	0	0	0	0	0	0	0	0
A0A1B0GU71	98	0.285714	0.0510204	0.183673	0.295918	0.112245	0.0408163	0.0204082	0.0102041	234.604	40.9959	455.837	-0.0866327	3.82153	0	21.4286	0	0	0	21	0	0	0	1	0	0	3	2	0	0	0	0	0	0.171717	0.282828	0	0	1	0	0	0	0	0	0	17	4	1	0	1
A0A1B0GU75	182	0.241758	0.126374	0.203297	0.148352	0.142857	0.0494505	0.043956	0.043956	218.578	26.3159	430.637	0.0767582	3.67896	0	0	0	0	0	0	0	0	0	0	0	0	0	0	0	0	0	2	2	0	0	0	0	4	0	0	0	0	0	0	27	0	2	0	0
A0A1B0GUA5	103	0.436893	0.0776699	0.116505	0.116505	0.0776699	0.0776699	0.0873786	0.00970874	205.492	39.9573	507.951	0.117961	3.0699	0	0	0	0	0	0	0	0	0	0	0	0	0	0	1	0.192308	0.980769	0	0	0.163462	0.625	0.932692	0	5	0	0	0	0	0	0	15	0	0	0	0
A0A1B0GUA6	201	0.288557	0.0248756	0.298507	0.154229	0.119403	0.0447761	0.0497512	0.0199005	213.468	33.2189	476.328	-0.0491542	3.13831	18.408	8.45771	0	0	37	17	0	0	1	1	0	0	6	5	0	0	0	0	0	0.193069	0.188119	0.39604	0	0	0	0	0	0	0	0	23	0	0	0	0
A0A1B0GUA7	166	0.313253	0.0662651	0.222892	0.150602	0.120482	0.0481928	0.0361446	0.0421687	220.706	32.0367	462.687	0.141867	3.48488	0	0	0	0	0	0	0	0	0	0	0	0	0	0	1	0.125749	0.988024	0	0	0.155689	0	0	1	2	0	0	0	0	0	0	23	0	1	0	6
A0A1B0GUA9	196	0.214286	0.0153061	0.229592	0.178571	0.219388	0.0561224	0.0714286	0.0153061	215.827	30.802	479.383	-0.272908	3.18245	81.1224	0	0	0	159	0	0	0	2	0	0	0	4	4	0	0	0	0	0	0	0.324873	0.862944	0	1	0	0	0	0	0	0	18	4	3	0	0
A0A1B0GUC4	108	0.268519	0.0555556	0.259259	0.166667	0.12037	0.111111	0.0185185	0	215.594	33.3324	465.065	0.0232407	3.34583	58.3333	0	0	0	63	0	0	0	1	0	0	0	4	4	0	0	0	0	0	0.137615	0.229358	0	0	0	0	0	0	0	0	0	24	1	0	0	1
A0A1B0GUE7	11	0.545455	0.0909091	0.0909091	0.181818	0	0	0.0909091	0	220.596	19.9545	462.636	0.567273	3.74909	0	0	0	0	0	0	0	0	0	0	0	0	0	0	0	0	0	0	0	0	0	0	0	0	0	0	0	0	0	0	13	2	0	0	0
A0A1B0GUF1	154	0.220779	0.025974	0.331169	0.136364	0.116883	0.0844156	0.0844156	0	208.497	36.7364	492.253	-0.0651299	2.99935	98.7013	0	0	0	152	0	0	0	1	0	0	0	3	3	0	0	0	0	0	0.167742	0.496774	0.754839	0	0	0	0	0	0	0	0	0	0	0	0	0
A0A1B0GUH1	482	0.352697	0.0622407	0.192946	0.126556	0.0995851	0.0643154	0.0767635	0.0248963	213.159	34.1359	473.643	0.036639	3.28106	0	4.35685	0	0	0	21	0	0	0	1	0	0	0	0	0	0	0	2	2	0	0.0973085	0.136646	0	14	0	0	0	0	0	0	80	0	0	0	2
A0A1B0GUI2	810	0.25679	0.0296296	0.25679	0.165432	0.155556	0.0691358	0.0493827	0.017284	217.173	30.3525	478.93	-0.13263	3.25799	53.4568	0	0	0	433	0	0	0	5	0	0	0	24	21	0	0	0	2	1	0.154131	0.378545	0.572133	0	9	0	0	0	0	0	0	0	0	0	0	0
A0A1B0GUI7	84	0.27381	0.0952381	0.27381	0.154762	0.0952381	0.0357143	0.0595238	0.0119048	221.77	35.081	461.131	0.0378571	3.59952	0	0	0	0	0	0	0	0	0	0	0	0	0	0	0	0	0	0	0	0	0	0	0	1	0	0	0	0	0	0	13	2	1	1	1
A0A1B0GUJ8	204	0.318627	0.0490196	0.117647	0.20098	0.151961	0.0637255	0.0784314	0.0196078	220.8	31.5142	480.387	-0.107843	3.41613	23.0392	0	0	0	47	0	0	0	1	0	0	0	5	2	0	0	0	0	0	0.0682927	0.180488	0	0	1	0	0	0	0	0	0	32	0	0	0	0
A0A1B0GUL7	405	0.323457	0.0592593	0.2	0.14321	0.128395	0.0666667	0.0641975	0.0148148	215.01	31.4299	463.116	0.0881235	3.36	0	8.14815	0	0	0	33	0	0	0	1	0	0	3	1	0	0	0	1	1	0.046798	0.182266	0.167488	0	8	0	0	0	0	0	0	50	0	0	0	0
A0A1B0GUM6	38	0.157895	0	0.5	0.0263158	0	0	0.315789	0	172.692	41.6395	562.947	0.261053	1.71895	100	0	0	0	38	0	0	0	1	0	0	0	2	0	0	0	0	0	0	0.717949	0.717949	0	0	2	0	0	0	0	0	0	0	10	0	0	0
A0A1B0GUQ0	79	0.278481	0.113924	0.177215	0.113924	0.101266	0.0886076	0.101266	0.0253165	209.724	41.1835	473.076	0.0286076	3.29291	0	0	0	0	0	0	0	0	0	0	0	0	0	0	0	0	0	0	0	0	0	0	0	3	0	0	0	0	0	0	13	1	1	0	1
A0A1B0GUS0	222	0.297297	0.0540541	0.18018	0.117117	0.0990991	0.157658	0.0675676	0.027027	206.354	40.9572	462.635	-0.0112613	3.11932	14.4144	0	0	0	32	0	0	0	1	0	0	0	6	5	0	0	0	0	0	0.282511	0.533632	0.860987	0	4	0	0	0	0	0	0	34	2	1	0	0
A0A1B0GUS4	154	0.272727	0.0909091	0.175325	0.168831	0.149351	0.0909091	0.0324675	0.0194805	221.537	28.4636	445.727	-0.0403247	3.62032	0	0	0	0	0	0	0	0	0	0	0	0	1	0	0	0	0	0	0	0	0	0	0	3	0	0	6	0	0	0	27	0	0	0	0
A0A1B0GUT2	108	0.222222	0.0277778	0.203704	0.194444	0.101852	0.0740741	0.12037	0.0555556	214.25	46.438	467.083	-0.208611	3.10565	0	0	0	0	0	0	0	0	0	0	0	0	3	0	0	0	0	0	0	0	0	0.678899	0	1	0	0	0	0	0	0	8	1	1	0	1
A0A1B0GUT8	65	0.323077	0.138462	0.246154	0.0615385	0.123077	0.0307692	0.0615385	0.0153846	208.528	33.0892	463.969	0.283077	3.43031	0	0	0	0	0	0	0	0	0	0	0	0	0	0	0	0	0	0	0	0	0	0	0	1	0	0	0	0	0	0	0	0	0	0	0
A0A1B0GUU1	675	0.362963	0.0755556	0.155556	0.115556	0.108148	0.0681481	0.0933333	0.0207407	207.35	38.1864	493.831	0.00897778	3.12701	0	0	0	0	0	0	0	0	0	0	0	0	0	0	1	0.0266272	0.997041	0	0	0.0532544	0.315089	0.690828	0	27	0	0	0	0	0	0	78	2	0	0	0
A0A1B0GUV1	79	0.265823	0.0759494	0.164557	0.139241	0.0632911	0.126582	0.126582	0.0379747	202.7	45.7468	475.215	-0.0444304	2.95152	41.7722	0	0	0	33	0	0	0	1	0	0	0	1	1	0	0	0	0	0	0.1625	0.4	0.475	0	1	0	0	0	0	0	0	13	3	0	0	0
A0A1B0GUV7	120	0.216667	0.075	0.316667	0.166667	0.0916667	0.075	0.00833333	0.05	222.806	30.5283	434.383	0.0428333	3.56858	0	0	0	0	0	0	0	0	0	0	0	0	1	1	0	0	0	0	0	0.0826446	0	0	0	2	0	0	0	0	0	0	13	0	1	0	1
A0A1B0GUV8	181	0.342541	0.0939227	0.154696	0.116022	0.121547	0.0662983	0.0883978	0.0165746	212.038	32.8757	470.436	0.0844199	3.38519	0	0	0	0	0	0	0	0	0	0	0	0	0	0	0	0	0	1	1	0.137363	0.214286	0.351648	1	8	0	0	0	0	0	0	26	0	0	0	0
A0A1B0GUW6	1196	0.238294	0.0501672	0.295987	0.135452	0.0777592	0.117893	0.0593645	0.0250836	208.207	34.9126	464.637	0.00520067	3.08777	53.5953	0	0	0	641	0	0	0	5	0	0	0	24	17	1	0.0183793	0.998329	0	0	0.119465	0.333333	0.372598	0	23	0	0	0	0	0	0	183	4	0	0	0
A0A1B0GUW7	55	0.4	0.109091	0.181818	0.163636	0.0545455	0.0363636	0.0363636	0.0181818	225.069	34.1055	458.455	0.265273	3.76927	0	0	0	0	0	0	0	0	0	0	0	0	0	0	1	0.410714	0.964286	0	0	0	0	0	0	0	0	0	0	0	0	0	6	0	0	0	4
A0A1B0GUX0	176	0.289773	0.113636	0.164773	0.176136	0.0852273	0.119318	0.0340909	0.0170455	220.787	34.7307	452.131	0.0853409	3.6717	0	0	0	0	0	0	0	0	0	0	0	0	1	0	0	0	0	0	0	0.20339	0.276836	0.293785	0	1	0	0	0	0	0	0	38	1	0	0	0
A0A1B0GUY1	285	0.14386	0.0421053	0.417544	0.129825	0.045614	0.0631579	0.157895	0	204.11	35.1453	495.414	0.00985965	2.84898	88.7719	0	0	0	253	0	0	0	1	0	0	0	6	6	0	0	0	0	0	0.276224	0.664336	0.828671	1	0	0	0	0	0	0	0	17	7	0	0	1
A0A1B0GUZ9	45	0.333333	0.244444	0.0888889	0.0444444	0.111111	0	0.0444444	0.133333	212.746	23.8911	407.533	0.382444	3.84044	0	0	0	0	0	0	0	0	0	0	0	0	0	0	1	0.456522	0.956522	0	0	0.326087	0.478261	0	0	0	0	0	0	0	0	0	4	0	1	0	0
A0A1B0GV03	622	0.199357	0.0337621	0.244373	0.212219	0.234727	0.022508	0.0450161	0.00803859	231.406	27.2058	423.704	-0.269309	3.81254	20.418	18.9711	0	0	127	118	0	0	2	2	0	0	9	7	0	0	0	0	0	0.470305	0.638844	0.58748	0	0	0	0	0	0	0	0	42	2	0	0	0
A0A1B0GV22	79	0.278481	0.113924	0.177215	0.113924	0.101266	0.0886076	0.101266	0.0253165	209.724	41.1835	473.076	0.0286076	3.29291	0	0	0	0	0	0	0	0	0	0	0	0	0	0	0	0	0	0	0	0	0	0	0	2	0	0	0	0	0	0	13	1	1	0	0
A0A1B0GV36	123	0.260163	0.0813008	0.195122	0.146341	0.186992	0.0162602	0.105691	0.00813008	216.66	29.2146	471.26	-0.0962602	3.44106	0	0	0	0	0	0	0	0	0	0	0	0	0	0	0	0	0	1	1	0.104839	0	0	0	4	0	0	0	0	0	0	0	1	1	0	0
A0A1B0GV72	72	0.333333	0.0694444	0.194444	0.111111	0.138889	0.0694444	0.0694444	0.0138889	213.303	39.9361	456.042	-0.106806	3.37431	0	0	0	0	0	0	0	0	0	0	0	0	1	1	0	0	0	1	1	0	0	0	0	1	0	0	0	0	0	0	14	1	0	0	1
A0A1B0GV80	90	0.3	0.0444444	0.188889	0.155556	0.0555556	0.0666667	0.133333	0.0555556	209.865	41.2489	488.433	0.0221111	3.01011	0	0	0	0	0	0	0	0	0	0	0	0	0	0	0	0	0	0	0	0	0.472527	0.472527	0	4	0	0	0	0	0	0	0	1	1	0	0
A0A1B0GV85	526	0.292776	0.0570342	0.281369	0.125475	0.0912548	0.0703422	0.0646388	0.0171103	208.582	36.7567	472.732	0.0184411	3.12	37.6426	0	0	0	198	0	0	0	4	0	0	0	7	7	0	0	0	1	1	0.0151803	0.157495	0.125237	1	8	0	0	0	0	0	0	19	3	1	1	1
A0A1B0GV90	55	0.4	0.109091	0.218182	0.0909091	0.0909091	0.0363636	0.0363636	0.0181818	208.617	29.4691	492.945	0.269455	3.26018	0	0	0	0	0	0	0	0	0	0	0	0	0	0	1	0.339286	0.964286	0	0	0.267857	0.482143	0	0	2	0	0	0	0	0	0	4	2	0	0	0
A0A1B0GV96	52	0.192308	0	0.230769	0.153846	0.211538	0.0769231	0.0961538	0.0384615	208.554	30.4904	495.865	-0.298846	2.85423	100	0	0	0	52	0	0	0	1	0	0	0	2	2	0	0	0	0	0	0.245283	0	0	0	0	0	0	0	0	0	0	2	1	0	0	0
A0A1B0GVB3	256	0.203125	0.105469	0.210938	0.242188	0.101562	0.09375	0.0234375	0.0195312	227.958	33.8477	433.863	-0.0168359	3.81566	0	0	0	0	0	0	0	0	0	0	0	0	2	1	0	0	0	0	0	0.0700389	0.151751	0	0	5	0	0	0	0	0	0	35	1	0	0	2
A0A1B0GVC2	190	0.3	0.0421053	0.115789	0.189474	0.131579	0.0684211	0.0947368	0.0578947	219.255	44.7747	478.589	-0.184947	3.27753	16.8421	0	0	0	32	0	0	0	1	0	0	0	1	1	0	0	0	1	1	0.219895	0.701571	0.879581	0	6	0	0	0	0	0	0	25	0	1	0	0
A0A1B0GVD1	139	0.323741	0.136691	0.18705	0.136691	0.0863309	0.0359712	0.057554	0.0359712	218.529	30.6597	428.741	0.266619	3.73094	0	0	0	0	0	0	0	0	0	0	0	0	0	0	0	0	0	0	0	0	0	0	1	2	0	0	0	0	0	0	18	0	1	2	0
A0A1B0GVD6	176	0.215909	0.0681818	0.267045	0.0909091	0.130682	0.0909091	0.0795455	0.0568182	206.969	34.2511	474.96	0.0128977	3.07006	18.75	0	0	0	33	0	0	0	1	0	0	0	1	0	0	0	0	0	0	0	0.180791	0.655367	0	1	0	0	0	0	0	0	0	2	0	0	0
A0A1B0GVG4	234	0.350427	0.017094	0.136752	0.17094	0.132479	0.0854701	0.0854701	0.0213675	212.906	47.1265	501.833	-0.286239	3.03534	33.3333	15.3846	0	0	78	36	0	0	2	1	0	0	6	5	0	0	0	0	0	0.595745	0.880851	0.991489	0	3	0	0	0	0	0	0	12	7	0	0	0
A0A1B0GVG6	124	0.145161	0.0241935	0.225806	0.177419	0.233871	0.0725806	0.0967742	0.0241935	220.022	36.5137	456.484	-0.276452	3.33484	93.5484	0	0	0	116	0	0	0	2	0	0	0	3	3	0	0	0	0	0	0.344	0.424	0.656	0	3	0	0	0	0	0	0	12	1	0	0	0
A0A1B0GVH4	220	0.295455	0.1	0.231818	0.145455	0.0863636	0.0590909	0.05	0.0318182	218.128	35.8864	429.159	0.103545	3.632	0	0	0	0	0	0	0	0	0	0	0	0	1	0	0	0	0	1	1	0	0	0	1	8	0	0	0	0	0	0	33	3	0	0	1
A0A1B0GVH6	325	0.24	0.101538	0.233846	0.190769	0.135385	0.0523077	0.04	0.00615385	219.794	36.2003	464.194	-0.0364	3.54443	10.7692	0	0	0	35	0	0	0	1	0	0	0	2	2	0	0	0	0	0	0.0429448	0.248466	0.404908	0	15	0	0	0	0	0	0	47	0	0	2	0
A0A1B0GVH7	501	0.267465	0.0898204	0.173653	0.237525	0.123752	0.0598802	0.0359281	0.011976	229.773	33.8974	442.988	-0.0113573	3.83493	0	0	0	0	0	0	0	0	0	0	0	0	2	1	0	0	0	1	1	0.0278884	0	0	0	10	0	0	0	0	0	0	92	0	0	0	2
A0A1B0GVI7	797	0.259724	0.0890841	0.281054	0.121706	0.109159	0.0664994	0.0501882	0.0225847	214.835	30.0035	443.803	0.101305	3.44194	8.03011	0	0	0	64	0	0	0	2	0	0	0	6	2	0	0	0	2	2	0.0626566	0.179198	0.278195	0	23	0	0	0	0	0	0	107	0	0	1	0
A0A1B0GVK7	77	0.155844	0.0909091	0.220779	0.285714	0.168831	0.012987	0.038961	0.025974	242.196	39.7091	429.675	-0.171948	4.12481	0	0	0	0	0	0	0	0	0	0	0	0	0	0	0	0	0	0	0	0	0.538462	0.538462	0	1	0	0	0	0	0	0	7	0	2	0	1
A0A1B0GVL6	79	0.531646	0.113924	0.101266	0.0506329	0.0632911	0.0379747	0.0759494	0.0253165	211.049	31.8076	492.253	0.651646	3.49519	0	0	0	0	0	0	0	0	0	0	0	0	0	0	2	0.575	0.975	0	0	0.5375	0.6625	0.8375	0	0	0	0	0	0	0	0	6	2	0	0	0
A0A1B0GVM2	712	0.328652	0.0828652	0.19382	0.122191	0.0955056	0.0660112	0.0800562	0.0294944	211.717	34.4402	465.93	0.0794233	3.32558	0	0	0	0	0	0	0	0	0	0	0	0	0	0	0	0	0	1	1	0.0168303	0.0336606	0	0	28	0	0	0	0	0	0	85	0	0	0	0
A0A1B0GVM5	59	0.254237	0.0677966	0.237288	0.220339	0.0847458	0.0847458	0.0338983	0.0169492	225.384	28.2949	467.559	0.0913559	3.61559	0	0	0	0	0	0	0	0	0	0	0	0	2	1	0	0	0	0	0	0.233333	0	0	0	0	0	0	0	0	0	0	13	0	0	0	0
A0A1B0GVM6	126	0.277778	0.047619	0.103175	0.206349	0.119048	0.103175	0.119048	0.0238095	217.241	38.7643	477.222	-0.172063	3.30889	27.7778	0	0	0	35	0	0	0	1	0	0	0	3	3	0	0	0	0	0	0.0708661	0.314961	0.622047	0	4	0	0	0	0	0	0	9	2	0	0	0
A0A1B0GVN1	81	0.333333	0.037037	0.259259	0.185185	0.135802	0.0246914	0.0123457	0.0123457	223.836	23.0679	472.383	0.188519	3.50914	0	0	0	0	0	0	0	0	0	0	0	0	0	0	0	0	0	0	0	0	0.5	0	0	2	0	0	0	0	0	0	0	3	1	0	0
A0A1B0GVN3	265	0.298113	0.0981132	0.245283	0.154717	0.113208	0.045283	0.0301887	0.0150943	218.13	30.4011	462.366	0.100226	3.51117	0	0	0	0	0	0	0	0	0	0	0	0	0	0	1	0.0827068	0.992481	0	0	0.105263	0.093985	0	1	6	0	0	0	0	0	0	35	0	0	0	14
A0A1B0GVQ0	90	0.355556	0.1	0.2	0.0888889	0.0555556	0.0777778	0.0777778	0.0444444	204.582	40.1222	466.522	-0.0536667	3.11211	0	0	0	0	0	0	0	0	0	0	0	0	0	0	1	0.252747	0.978022	0	0	0.21978	0.263736	0	0	5	0	0	0	0	0	0	5	1	2	0	0
A0A1B0GVQ3	168	0.172619	0.047619	0.380952	0.125	0.0714286	0.160714	0.0238095	0.0178571	218.464	33.3196	414.44	-0.121726	3.51214	75.5952	0	0	0	127	0	0	0	2	0	0	0	4	4	0	0	0	0	0	0.532544	0.579882	0.56213	0	0	0	0	0	0	0	0	25	2	1	2	6
A0A1B0GVR7	95	0.284211	0.0421053	0.168421	0.252632	0.115789	0.0421053	0.0842105	0.0105263	223.972	36.2568	467.4	-0.102737	3.49274	31.5789	0	0	0	30	0	0	0	1	0	0	0	3	2	0	0	0	0	0	0	0	0	0	0	0	0	0	0	0	0	8	1	2	0	1
A0A1B0GVS7	189	0.232804	0.0529101	0.280423	0.126984	0.185185	0.026455	0.010582	0.0846561	216.986	24.5561	434.931	0.052963	3.35508	0	0	0	0	0	0	0	0	0	0	0	0	1	1	0	0	0	1	1	0.131579	0.152632	0	0	8	0	0	0	0	0	0	12	4	1	0	0
A0A1B0GVT2	93	0.408602	0.0752688	0.129032	0.0967742	0.0967742	0.107527	0.0645161	0.0215054	209.325	29.628	475.839	0.209785	3.2843	0	0	0	0	0	0	0	0	0	0	0	0	0	0	1	0.223404	0.978723	0	0	0	0.319149	0	0	5	0	0	0	0	0	0	13	2	0	0	0
A0A1B0GVU8	80	0.2375	0.1	0.225	0.2	0.025	0.0875	0.075	0.05	212.196	40.4213	469.5	0.11875	3.27387	0	0	0	0	0	0	0	0	0	0	0	0	0	0	0	0	0	0	0	0	0	0	0	4	0	0	0	0	0	0	0	3	1	1	0
A0A1B0GVV1	85	0.329412	0.129412	0.211765	0.0705882	0.0705882	0.0352941	0.141176	0.0117647	206.773	30.9671	476.788	0.411059	3.32659	0	0	0	0	0	0	0	0	0	0	0	0	0	0	1	0.244186	0.976744	0	0	0.244186	0.244186	0	0	1	0	0	0	0	0	0	3	2	2	1	0
A0A1B0GVX0	72	0.347222	0.152778	0.152778	0.0972222	0.0277778	0.0555556	0.0555556	0.111111	215.907	33.4306	428.833	0.32125	3.60139	0	0	0	0	0	0	0	0	0	0	0	0	0	0	1	0.342466	0.972603	1	1	0.164384	0.438356	0	0	0	0	0	0	0	0	0	10	0	0	0	1
A0A1B0GVY2	172	0.180233	0.0290698	0.203488	0.0988372	0.0174419	0.197674	0.0872093	0.186047	200.893	38.7448	441.279	-0.0277907	2.67384	0	0	0	0	0	0	0	0	0	0	0	0	1	0	0	0	0	0	0	0.277457	0.791908	0.791908	0	3	0	0	0	0	0	0	19	1	1	0	0
A0A1B0GVY4	71	0.267606	0.084507	0.169014	0.197183	0.225352	0.028169	0.0140845	0.0140845	225.705	24.0901	461.324	-0.00126761	3.71268	18.3099	0	0	0	13	0	0	0	0	0	0	0	0	0	1	0.277778	0.972222	0	0	0.402778	0.402778	0.402778	0	2	0	0	0	0	0	0	19	2	0	0	0
A0A1B0GVY8	99	0.272727	0.0505051	0.171717	0.252525	0.111111	0.0606061	0.0707071	0.010101	224.958	35.9394	461.263	-0.0746465	3.56465	30.303	0	0	0	30	0	0	0	1	0	0	0	3	2	0	0	0	0	0	0	0	0	0	0	0	0	0	0	0	0	8	2	2	0	0
A0A1B0GVZ2	78	0.205128	0.0897436	0.166667	0.25641	0.205128	0.025641	0.0128205	0.0384615	238.464	35.0513	424.526	-0.183974	4.07987	0	26.9231	0	0	0	21	0	0	0	1	0	0	0	0	0	0	0	0	0	0.177215	0.493671	0.835443	0	0	0	0	0	0	0	0	8	0	0	0	0
A0A1B0GVZ6	204	0.318627	0.0294118	0.166667	0.215686	0.0784314	0.102941	0.0686275	0.0196078	220.876	45.348	471.936	-0.0896569	3.35863	28.9216	0	0	0	59	0	0	0	1	0	0	0	6	6	0	0	0	0	0	0.0585366	0.321951	0.639024	0	0	0	0	0	0	0	0	30	0	0	0	0
A0A1B0GVZ9	245	0.379592	0.126531	0.2	0.0857143	0.0571429	0.0408163	0.0693878	0.0408163	206.071	31.6061	465.445	0.388694	3.29596	0	0	0	0	0	0	0	0	0	0	0	0	0	0	6	0.479675	0.99187	0	0	0	0.195122	0	0	3	0	0	0	0	0	0	36	4	0	0	1
A0A1B0GW01	73	0.30137	0.219178	0.136986	0.109589	0.136986	0.0684932	0.0136986	0.0136986	221	30.2822	412.808	0.252055	4.11795	0	0	0	0	0	0	0	0	0	0	0	0	0	0	1	0.283784	0.972973	0	0	0.459459	0.405405	0	0	0	0	0	0	0	0	0	14	1	0	2	0
A0A1B0GW02	139	0.302158	0.057554	0.179856	0.0647482	0.0647482	0.143885	0.0431655	0.143885	207.144	32.0187	444.734	0.116906	3.04209	0	0	0	0	0	0	0	0	0	0	0	0	0	0	1	0.171429	0.985714	0	0	0.35	0.707143	0.942857	0	5	0	0	0	0	0	0	0	0	0	0	0
A0A1B0GW03	91	0.208791	0.10989	0.208791	0.120879	0.142857	0.0769231	0.120879	0.010989	207.719	36.6901	448.989	-0.0141758	3.30967	0	0	0	0	0	0	0	0	0	0	0	0	2	0	0	0	0	2	1	0	0	0	0	5	0	0	0	0	0	0	24	1	2	0	0
A0A1B0GW10	696	0.257184	0.0531609	0.304598	0.127874	0.0933908	0.0818966	0.0689655	0.012931	211.21	33.2601	461.562	0.0643822	3.20915	15.3736	3.01724	0	0	107	21	0	0	3	1	0	0	22	13	0	0	0	1	1	0.149211	0.304161	0.296987	0	8	0	0	0	0	0	0	184	2	1	0	0
A0A1B0GW15	77	0.311688	0.103896	0.194805	0.220779	0.0909091	0.025974	0.0519481	0	228.544	36.4182	466.039	0.0448052	3.77221	0	38.961	0	0	0	30	0	0	0	1	0	0	0	0	0	0	0	0	0	0	0.410256	0	0	1	0	0	0	0	0	0	10	0	1	0	0
A0A1B0GW23	586	0.322526	0.0955631	0.203072	0.127986	0.105802	0.0682594	0.0665529	0.00853242	211.776	36.8554	465.08	0.0572308	3.37684	0	0	0	0	0	0	0	0	0	0	0	0	0	0	0	0	0	2	2	0.0613288	0.0340716	0.0919932	1	23	0	0	0	0	0	0	91	1	1	1	12
A0A1B0GW35	172	0.313953	0.133721	0.19186	0.151163	0.139535	0.0232558	0.0116279	0.0348837	221.972	22.2337	452.395	0.133779	3.73814	0	0	0	0	0	0	0	0	0	0	0	0	0	0	0	0	0	0	0	0	0	0	0	0	0	0	0	0	0	0	28	1	0	0	1
A0A1B0GW54	56	0.553571	0.0357143	0.107143	0.125	0	0.107143	0.0535714	0.0178571	213.737	44.3625	505	0.13375	3.20036	0	0	0	0	0	0	0	0	0	0	0	0	0	0	1	0.385965	0.964912	0	0	0.789474	0.964912	0.964912	0	1	0	0	0	0	0	0	7	0	0	0	0
A0A1B0GW55	424	0.292453	0.0566038	0.174528	0.117925	0.0919811	0.148585	0.101415	0.0117925	204.846	45.7979	481.251	-0.166848	3.01576	71.934	0	0	0	305	0	0	0	4	0	0	0	9	9	0	0	0	2	1	0.350588	0.736471	0.896471	0	1	0	0	0	0	0	0	57	3	0	1	0
A0A1B0GW59	222	0.27027	0.0540541	0.261261	0.193694	0.103604	0.0630631	0.0315315	0.0225225	223.651	32.0541	467.153	0.0686486	3.50198	25.6757	16.6667	0	0	57	37	0	0	1	1	0	0	4	3	0	0	0	0	0	0.139013	0	0	0	5	0	0	0	0	0	0	46	0	0	0	2
A0A1B0GW64	132	0.310606	0.0530303	0.174242	0.0909091	0.0984848	0.166667	0.0833333	0.0227273	204.453	37.6015	457.553	-0.0236364	3.10333	0	0	0	0	0	0	0	0	0	0	0	0	2	0	1	0.165414	0.984962	0	0	0.165414	0.413534	0	0	6	0	0	0	0	0	0	22	3	0	0	0
A0A1B0GWA3	101	0.346535	0.049505	0.336634	0.118812	0.0693069	0.019802	0.039604	0.019802	212.164	30.5564	479.178	0.19505	3.17495	0	0	0	0	0	0	0	0	0	0	0	0	0	0	0	0	0	0	0	0.117647	0	0	0	1	0	0	0	0	0	0	0	0	0	0	0
A0A1B0GWB0	17	0.294118	0	0.235294	0.176471	0.0588235	0.176471	0	0	212.272	49.7625	487.375	-0.02125	3.07875	0	0	0	0	0	0	0	0	0	0	0	0	1	1	0	0	0	0	0	0	0	0	0	0	0	0	0	0	0	0	4	1	1	0	0
A0A1B0GWB2	263	0.361217	0.0722433	0.121673	0.0684411	0.0912548	0.18251	0.095057	0.00760456	195.377	38.1684	496.635	-0.0561597	2.81806	40.6844	0	0	0	107	0	0	0	1	0	0	0	2	1	2	0.159091	0.992424	0	0	0.420455	0.867424	0.666667	0	9	0	0	0	0	0	0	50	0	0	1	0
A0A1B0GWG1	1279	0.218139	0.03362	0.325254	0.1595	0.151681	0.0453479	0.0461298	0.0203284	215.163	28.5404	474.193	-0.0961689	3.18288	60.4378	0	0	0	773	0	0	0	6	0	0	0	35	29	0	0	0	1	1	0.0664062	0.0828125	0.571094	0	14	0	0	0	0	0	0	138	6	2	0	0
A0A1B0GWG4	90	0.366667	0.1	0.244444	0.111111	0.0888889	0.0555556	0.0333333	0	213.166	30.6189	453.067	0.406667	3.50678	0	0	0	0	0	0	0	0	0	0	0	0	0	0	1	0.230769	0.978022	0	0	0.21978	0.285714	0	0	3	0	0	0	0	0	0	21	5	2	0	0
A0A1B0GWG9	222	0.202703	0.0765766	0.252252	0.108108	0.144144	0.0990991	0.0810811	0.036036	206.202	36.1617	470.991	-0.0365315	3.09279	38.7387	0	0	0	86	0	0	0	2	0	0	0	4	2	0	0	0	0	0	0.0896861	0.233184	0.955157	0	3	0	0	0	0	0	0	0	1	5	0	0
A0A1B0GWH4	333	0.228228	0.0690691	0.297297	0.132132	0.123123	0.0720721	0.0660661	0.012012	213.154	33.842	461.574	-0.0175976	3.28342	39.6396	0	0	0	132	0	0	0	2	0	0	0	8	7	0	0	0	0	0	0.0778443	0.0778443	0.179641	0	8	0	0	0	0	0	0	47	4	0	0	0
A0A1B0GWH5	175	0.205714	0.0628571	0.262857	0.125714	0.148571	0.0857143	0.0571429	0.0514286	212.477	34.7531	464.057	-0.0320571	3.2224	19.4286	0	0	0	34	0	0	0	1	0	0	0	2	0	0	0	0	0	0	0.0681818	0.181818	0.659091	0	8	0	0	0	0	0	0	0	5	2	0	0
A0A1B0GWH6	25	0.68	0.2	0.04	0	0.04	0	0.04	0	214.516	23.648	437.56	1.104	3.994	0	0	0	0	0	0	0	0	0	0	0	0	0	0	1	0.807692	0.923077	0	0	0	0.923077	0	0	1	0	0	0	0	0	0	3	1	0	0	0
A0A1B0GWI6	518	0.237452	0.046332	0.208494	0.138996	0.119691	0.119691	0.117761	0.011583	207.469	40.7575	485.815	-0.167181	3.02124	85.1351	4.82625	0	0	441	25	0	0	4	1	0	0	14	12	0	0	0	0	0	0.100193	0.250482	0.815029	0	2	0	0	0	0	0	0	72	0	1	0	1
A0A1B0GWJ7	208	0.288462	0.129808	0.158654	0.120192	0.105769	0.0769231	0.0865385	0.0336538	211.025	37.4062	447.471	0.0615865	3.45409	0	0	0	0	0	0	0	0	0	0	0	0	0	0	1	0.0909091	0.990431	0	0	0.138756	0.205742	0.205742	0	5	0	0	0	0	0	0	30	1	0	0	3
A0A1B0GWK0	134	0.283582	0.0820896	0.19403	0.179104	0.171642	0.0373134	0.0522388	0	216.518	27.447	456.455	0.111791	3.47604	0	0	0	0	0	0	0	0	0	0	0	0	1	0	0	0	0	2	1	0.0740741	0	0	0	1	0	0	0	0	0	0	22	1	1	0	0
A0A1B0GX31	115	0.252174	0.104348	0.26087	0.121739	0.0956522	0.0434783	0.0956522	0.026087	212.137	37.687	467.687	0.0213913	3.31452	0	0	0	0	0	0	0	0	0	0	0	0	1	0	0	0	0	1	1	0	0	0	1	4	0	0	0	0	0	0	15	3	0	0	1
A0A1B0GX49	114	0.333333	0.0877193	0.27193	0.0877193	0.0614035	0.0438596	0.0789474	0.0350877	206.241	36.9044	473.561	0.162018	3.11474	0	0	0	0	0	0	0	0	0	0	0	0	1	0	0	0	0	1	1	0	0	0	1	4	0	0	0	0	0	0	17	2	1	0	1
A0A1B0GX51	115	0.278261	0.104348	0.243478	0.113043	0.0956522	0.0434783	0.0956522	0.026087	210.792	36.767	475.652	0.00573913	3.28035	0	0	0	0	0	0	0	0	0	0	0	0	0	0	0	0	0	1	1	0	0	0	1	6	0	0	0	0	0	0	17	1	1	0	0
A0A1B0GX56	115	0.330435	0.147826	0.278261	0.104348	0.0608696	0.0173913	0.0347826	0.026087	212.196	30.1304	477.322	0.151739	3.44574	0	0	0	0	0	0	0	0	0	0	0	0	0	0	0	0	0	1	1	0	0.267241	0	1	4	0	0	0	0	0	0	20	1	0	0	1
A0A1B0GX68	115	0.278261	0.13913	0.26087	0.0956522	0.130435	0.0347826	0.0347826	0.026087	215.6	29.4139	440.278	0.15913	3.62965	0	0	0	0	0	0	0	0	0	0	0	0	0	0	0	0	0	1	1	0	0	0	1	5	0	0	0	0	0	0	20	1	1	0	1
A0A1B0GX78	115	0.347826	0.0695652	0.191304	0.121739	0.113043	0.0608696	0.0521739	0.0434783	215.829	34.0591	446.791	0.111217	3.42774	0	0	0	0	0	0	0	0	0	0	0	0	0	0	0	0	0	1	1	0.0862069	0	0	1	7	0	0	0	0	0	0	17	2	0	1	1
A0A1B0GX95	115	0.26087	0.0782609	0.26087	0.156522	0.0869565	0.026087	0.104348	0.026087	214.637	41.5983	486.609	-0.0775652	3.23809	0	0	0	0	0	0	0	0	0	0	0	0	0	0	0	0	0	1	1	0	0	0	1	4	0	0	0	0	0	0	16	1	0	0	1
A0A1B0GXF2	115	0.269565	0.0956522	0.269565	0.104348	0.0956522	0.0347826	0.104348	0.026087	207.795	36.1113	485.748	0.064087	3.14435	0	0	0	0	0	0	0	0	0	0	0	0	0	0	0	0	0	1	1	0	0	0	1	4	0	0	0	0	0	0	16	1	1	0	0
A0A1B0GXI6	315	0.339683	0.0825397	0.222222	0.136508	0.152381	0.031746	0.0253968	0.00952381	221.107	25.5044	455.2	0.0549206	3.61146	0	0	0	0	0	0	0	0	0	0	0	0	0	0	0	0	0	0	0	0.0791139	0.262658	0	0	0	0	0	0	0	0	0	64	0	1	0	0
A0A1C7CYW4	349	0.386819	0.0916905	0.212034	0.106017	0.106017	0.0487106	0.0487106	0	212.044	31.1802	476.524	0.173467	3.38037	0	0	0	0	0	0	0	0	0	0	0	0	0	0	1	0.06	0.994286	0	0	0.08	0.214286	0.4	1	5	0	0	0	0	0	0	46	0	1	2	20
A0A1W2PL72	282	0.219858	0.0460993	0.216312	0.159574	0.113475	0.102837	0.117021	0.0248227	212.836	38.8617	468.177	-0.0820213	3.20241	69.5035	0	0	0	196	0	0	0	3	0	0	0	9	6	0	0	0	1	1	0.141343	0.113074	0.628975	0	1	0	0	0	0	0	0	0	3	0	0	0
A0A1W2PN81	502	0.338645	0.105578	0.183267	0.113546	0.0976096	0.063745	0.061753	0.0358566	213.021	32.9705	453.578	0.132749	3.44283	0	0	0	0	0	0	0	0	0	0	0	0	0	0	4	0.16501	0.996024	2	2	0.0695825	0.083499	0.190855	1	15	0	0	0	0	0	0	69	0	0	0	0
A0A1W2PNG4	157	0.216561	0.0700637	0.229299	0.229299	0.11465	0.0636943	0.0636943	0.00636943	222.069	35.7853	469.603	-0.157115	3.46244	38.8535	0	0	0	61	0	0	0	1	0	0	0	2	2	0	0	0	0	0	0.0822785	0.151899	0	0	0	0	0	0	0	0	0	0	1	0	0	0
A0A1W2PNM2	257	0.241245	0.0466926	0.194553	0.194553	0.0583658	0.0972763	0.14786	0.0194553	209.399	52.2992	480.681	-0.104981	3.03498	63.035	0	0	0	162	0	0	0	2	0	0	0	5	4	0	0	0	0	0	0.0465116	0.562016	0.790698	0	6	0	0	0	0	0	0	0	0	0	0	0
A0A1W2PNN7	141	0.234043	0.0496454	0.134752	0.170213	0.0780142	0.177305	0.134752	0.0212766	209.259	51.4028	472.993	-0.195957	3.09043	83.6879	0	0	0	118	0	0	0	1	0	0	0	3	3	0	0	0	0	0	0.274648	0.78169	0.985915	0	1	0	0	0	0	0	0	32	1	0	0	0
A0A1W2PNQ7	964	0.261411	0.0280083	0.261411	0.209544	0.161826	0.0228216	0.033195	0.0217842	225.867	26.3802	470.584	-0.136629	3.47408	31.2241	33.8174	0	0	301	326	0	0	3	7	0	0	16	11	0	0	0	0	0	0.0259067	0.178238	0.603109	0	2	0	0	0	0	0	0	0	2	0	0	0
A0A1W2PNR3	127	0.259843	0.0866142	0.23622	0.149606	0.0708661	0.11811	0.0629921	0.015748	212.814	36.5047	460.937	0.198189	3.37583	0	0	0	0	0	0	0	0	0	0	0	0	3	1	0	0	0	0	0	0.3125	0.382812	0.382812	0	6	0	0	0	0	0	0	21	1	1	0	0
A0A1W2PNU3	283	0.166078	0.0918728	0.328622	0.0954064	0.0141343	0.243816	0.0459364	0.0141343	202.698	39.4548	451.141	0.124558	3.09816	42.7562	0	0	0	121	0	0	0	1	0	0	0	5	4	0	0	0	0	0	0.528169	0.96831	0.943662	0	10	0	0	0	0	0	0	85	5	1	1	0
A0A1W2PNV4	684	0.302632	0.0921053	0.22807	0.150585	0.0935673	0.0423977	0.0599415	0.0307018	212.305	35.9292	466.091	0.0305117	3.31272	0	0	0	0	0	0	0	0	0	0	0	0	2	1	0	0	0	2	1	0.0671533	0.192701	0.239416	0	21	0	0	0	0	0	0	98	6	0	0	1
A0A1W2PNW3	253	0.280632	0.118577	0.201581	0.134387	0.0632411	0.0948617	0.0750988	0.0316206	209.599	39.4727	453.395	0.149289	3.35261	0	0	0	0	0	0	0	0	0	0	0	0	0	0	1	0.0787402	0.992126	2	1	0.0472441	0	0	1	9	0	0	0	0	0	0	28	0	0	0	0
A0A1W2PNX6	92	0.293478	0.0978261	0.152174	0.23913	0.0217391	0.0978261	0.0543478	0.0434783	225.746	51.6522	467.043	0.000978261	3.62196	0	0	0	0	0	0	0	0	0	0	0	0	0	0	0	0	0	0	0	0	0	0.483871	0	1	0	0	0	0	0	0	0	3	2	0	0
A0A1W2PNY1	36	0.277778	0.166667	0.166667	0.138889	0.138889	0.0555556	0.0277778	0.0277778	213.218	34.6389	405.556	0.01	3.77222	0	0	0	0	0	0	0	0	0	0	0	0	0	0	0	0	0	0	0	0	0	0	0	1	0	0	0	0	0	0	131	0	1	0	0
A0A1W2PP11	408	0.316176	0.127451	0.215686	0.120098	0.0539216	0.0612745	0.0882353	0.0171569	209.537	38.6958	470.267	0.141985	3.33686	0	0	0	0	0	0	0	0	0	0	0	0	0	0	6	0.264059	0.99511	1	1	0	0.0806846	0.193154	0	8	0	0	0	0	0	0	43	0	0	0	0
A0A1W2PP18	115	0.295652	0.0782609	0.147826	0.130435	0.130435	0.0869565	0.0782609	0.0521739	218.849	34.2957	451.67	-0.00313043	3.52374	0	0	0	0	0	0	0	0	0	0	0	0	0	0	0	0	0	0	0	0.146552	0.267241	0.267241	1	3	0	0	0	0	0	0	14	1	0	0	0
A0A1W2PP55	124	0.258065	0.0887097	0.241935	0.16129	0.0725806	0.0967742	0.0645161	0.016129	214.581	36.2806	462.734	0.193387	3.41403	0	0	0	0	0	0	0	0	0	0	0	0	1	0	0	0	0	0	0	0.176	0.32	0	0	8	0	0	0	0	0	0	22	1	1	0	0
A0A1W2PP64	1363	0.292737	0.112252	0.267058	0.0990462	0.110051	0.0374175	0.0557594	0.0256787	213.03	29.4041	459.784	0.0912399	3.40918	0	0	0	0	0	0	0	0	0	0	0	0	0	0	0	0	0	2	2	0.0234604	0.0351906	0	1	42	0	0	0	0	0	0	0	1	0	1	0
A0A1W2PP80	73	0.383562	0.0136986	0.123288	0.109589	0.136986	0.0684932	0.0958904	0.0547945	204.846	42.4903	508.347	-0.274861	2.77264	0	0	0	0	0	0	0	0	0	0	0	0	0	0	0	0	0	0	0	0.243243	0.648649	0.932432	0	3	0	0	0	0	0	0	3	0	0	0	1
A0A1W2PP81	198	0.323232	0.030303	0.171717	0.166667	0.156566	0.0606061	0.0757576	0.0151515	214.348	35.7308	484.131	-0.122424	3.18879	50.5051	0	0	0	100	0	0	0	1	0	0	0	5	3	0	0	0	0	0	0.0653266	0.165829	0	0	5	0	0	0	0	0	0	21	0	1	0	0
A0A1W2PP97	93	0.387097	0.0752688	0.215054	0.0967742	0.129032	0.0322581	0.0430108	0.0215054	213.053	28.2817	478.075	0.152151	3.33462	0	0	0	0	0	0	0	0	0	0	0	0	0	0	0	0	0	1	1	0	0	0	0	0	0	0	0	0	0	0	14	3	1	0	0
A0A1W2PPC4	97	0.298969	0.0618557	0.237113	0.154639	0.113402	0.0412371	0.0618557	0.0309278	218.024	31.2928	461.825	-0.014433	3.36907	0	0	0	0	0	0	0	0	0	0	0	0	1	0	0	0	0	1	1	0	0	0	0	3	0	0	0	0	0	0	0	2	4	0	0
A0A1W2PPD8	638	0.272727	0.0940439	0.203762	0.141066	0.0956113	0.0862069	0.0830721	0.023511	211.713	36.7908	457.777	0.0274922	3.33397	10.6583	0	0	0	68	0	0	0	1	0	0	0	6	5	0	0	0	2	2	0.109546	0.126761	0.266041	0	25	0	0	0	0	0	0	104	0	1	0	0
A0A1W2PPE2	198	0.318182	0.030303	0.176768	0.166667	0.156566	0.0606061	0.0757576	0.0151515	214.447	35.7071	483.667	-0.118131	3.19182	50.5051	0	0	0	100	0	0	0	1	0	0	0	5	4	0	0	0	0	0	0.0653266	0.165829	0	0	4	0	0	0	0	0	0	21	0	1	0	0
A0A1W2PPE3	182	0.263736	0.0549451	0.126374	0.236264	0.0824176	0.104396	0.10989	0.021978	220.855	53.3176	477.253	-0.278077	3.3644	46.1538	0	0	0	84	0	0	0	2	0	0	0	6	4	0	0	0	0	0	0.398907	0.901639	0.928962	0	3	0	0	0	0	0	0	23	3	1	0	0
A0A1W2PPE8	360	0.277778	0.0888889	0.238889	0.133333	0.0805556	0.0888889	0.0638889	0.0277778	209.821	38.4803	456.1	0.0737778	3.26622	18.3333	0	0	0	66	0	0	0	1	0	0	0	2	2	1	0.0443213	0.99446	2	1	0.033241	0	0	1	14	0	0	0	0	0	0	49	2	0	0	0
A0A1W2PPF3	345	0.223188	0.0927536	0.278261	0.153623	0.121739	0.0811594	0.0405797	0.00869565	219.649	31.9983	429.449	0.0344058	3.64536	11.8841	0	0	0	41	0	0	0	1	0	0	0	6	3	0	0	0	2	1	0.0404624	0.0722543	0	0	6	0	0	0	0	0	0	41	2	0	0	0
A0A1W2PPG7	69	0.405797	0.0724638	0.202899	0.101449	0.115942	0.0434783	0.0434783	0.0144928	209.417	24.7261	479.928	0.0566667	3.21638	0	0	0	0	0	0	0	0	0	0	0	0	0	0	0	0	0	0	0	0	0	0	0	1	0	0	0	0	0	0	7	1	1	1	1
A0A1W2PPH5	198	0.313131	0.0353535	0.171717	0.176768	0.161616	0.0606061	0.0707071	0.010101	216.114	35.9182	476.5	-0.120404	3.27485	50.5051	0	0	0	100	0	0	0	1	0	0	0	5	4	0	0	0	0	0	0.115578	0.316583	0.522613	0	2	0	0	0	0	0	0	22	0	1	1	0
A0A1W2PPH8	454	0.319383	0.0528634	0.259912	0.145374	0.127753	0.0418502	0.0462555	0.00660793	212.749	32.2115	469.385	-0.0111013	3.21401	48.6784	0	0	0	221	0	0	0	1	0	0	0	6	5	0	0	0	0	0	0.0285714	0.652747	0.6	0	2	0	0	0	0	0	0	0	0	0	0	0
A0A1W2PPI3	338	0.257396	0.0887574	0.233728	0.139053	0.0887574	0.091716	0.0798817	0.0207101	209.499	37.0979	462.92	0.0965089	3.25944	11.8343	0	0	0	40	0	0	0	1	0	0	0	2	1	1	0.0471976	0.9941	2	1	0	0.0973451	0	1	15	0	0	0	0	0	0	0	3	2	1	0
A0A1W2PPK0	400	0.2125	0.09	0.295	0.1325	0.0975	0.07	0.0625	0.04	213.755	32.0875	444.88	0.002025	3.37535	19.25	0	0	0	77	0	0	0	2	0	0	0	6	0	0	0	0	1	1	0.114713	0.274314	0.25187	0	11	0	0	0	0	0	0	37	0	0	0	0
A0A1W2PPL8	197	0.350254	0.0456853	0.162437	0.126904	0.162437	0.0659898	0.0609137	0.0253807	213.388	31.4472	466.376	-0.0753807	3.27736	21.8274	0	0	0	43	0	0	0	1	0	0	0	2	2	0	0	0	0	0	0	0	0	0	1	0	0	0	0	0	0	19	0	0	0	0
A0A1W2PPM0	123	0.317073	0.0650407	0.211382	0.105691	0.097561	0.0569106	0.0813008	0.0650407	210.952	30.248	466.634	0.00926829	3.21252	0	0	0	0	0	0	0	0	0	0	0	0	0	0	0	0	0	0	0	0	0	0.5	0	3	0	0	0	0	0	0	12	1	0	0	0
A0A1W2PPM1	405	0.219753	0.0814815	0.296296	0.135802	0.0987654	0.0641975	0.0716049	0.0320988	213.365	31.8988	444.012	0.00854321	3.36109	8.64198	0	0	0	35	0	0	0	1	0	0	0	6	2	0	0	0	1	1	0.160099	0.285714	0.608374	0	12	0	0	0	0	0	0	44	0	0	0	0
A0A1W2PPQ1	181	0.342541	0.0883978	0.187845	0.0994475	0.0883978	0.0773481	0.0828729	0.0331492	209.093	35.2481	486.326	0.049337	3.21072	0	0	0	0	0	0	0	0	0	0	0	0	0	0	1	0.0989011	0.989011	1	1	0.131868	0.274725	0.274725	1	5	0	0	0	0	0	0	30	2	0	0	2
A0A1W2PPR1	153	0.215686	0.00653595	0.156863	0.117647	0.0718954	0.222222	0.176471	0.0326797	199.456	49.9412	501.935	-0.23085	2.6283	100	0	0	0	153	0	0	0	1	0	0	0	3	3	0	0	0	0	0	0.402597	0.88961	0.88961	0	0	0	0	0	0	0	0	0	0	0	0	0
A0A1W2PPS6	83	0.204819	0.0843373	0.240964	0.120482	0.0843373	0.108434	0.0843373	0.0722892	207.732	41.4072	440.289	-0.108072	3.1812	0	0	0	0	0	0	0	0	0	0	0	0	2	1	0	0	0	0	0	0	0	0	0	0	0	0	0	0	0	0	0	2	1	0	0
A0A1W2PPV4	95	0.242105	0.147368	0.231579	0.147368	0.136842	0.0315789	0.0315789	0.0315789	221.305	27.1989	435.211	0.115474	3.75905	0	0	0	0	0	0	0	0	0	0	0	0	0	0	0	0	0	1	1	0	0	0	0	0	0	0	0	0	0	0	16	1	1	0	0
A0A1W2PPV9	198	0.242424	0.0909091	0.242424	0.126263	0.111111	0.0707071	0.0959596	0.020202	206.144	37.2808	470.424	0.0795455	3.14944	0	0	0	0	0	0	0	0	0	0	0	0	2	0	0	0	0	2	1	0	0	0	0	15	0	0	0	0	0	0	52	3	3	1	0
A0A1W2PPW3	197	0.314721	0.0406091	0.192893	0.152284	0.162437	0.0609137	0.0659898	0.0101523	214.731	32.3832	476.629	-0.114619	3.25325	48.731	0	0	0	96	0	0	0	1	0	0	0	4	4	0	0	0	0	0	0	0	0	0	2	0	0	0	0	0	0	23	0	1	1	0
A0A1W2PPW7	399	0.263158	0.0902256	0.24812	0.130326	0.085213	0.0927318	0.0651629	0.0250627	208.989	38.3802	458.008	0.0597995	3.24484	27.8195	0	0	0	111	0	0	0	2	0	0	0	2	2	1	0.05	0.995	2	1	0.06	0.08	0	1	11	0	0	0	0	0	0	48	7	3	0	0
A0A1W2PPZ6	126	0.269841	0.0793651	0.230159	0.15873	0.0714286	0.103175	0.0634921	0.0238095	214.406	36.577	456.556	0.198413	3.39516	0	0	0	0	0	0	0	0	0	0	0	0	0	0	0	0	0	0	0	0.149606	0.19685	0	0	5	0	0	0	0	0	0	23	1	1	0	0
A0A1W2PQ09	198	0.292929	0.0454545	0.20202	0.161616	0.166667	0.0656566	0.0555556	0.010101	216.803	32.9914	466.838	-0.101616	3.33747	50.5051	0	0	0	100	0	0	0	1	0	0	0	4	3	0	0	0	0	0	0	0	0	0	3	0	0	0	0	0	0	21	0	1	1	0
A0A1W2PQ27	194	0.28866	0.0824742	0.21134	0.139175	0.159794	0.0360825	0.0412371	0.0412371	220.779	31.9938	440.732	0.0170103	3.57479	0	12.3711	0	0	0	24	0	0	0	1	0	0	0	0	0	0	0	0	0	0.0820513	0.14359	0.261538	0	8	0	0	0	0	0	0	28	2	1	0	0
A0A1W2PQ41	1184	0.29223	0.115709	0.273649	0.0954392	0.110642	0.0371622	0.0481419	0.027027	213.375	29.3412	455.822	0.0971284	3.43748	0	0	0	0	0	0	0	0	0	0	0	0	0	0	0	0	0	3	3	0.0270042	0.0405063	0	1	38	0	0	0	0	0	0	0	1	1	1	0
A0A1W2PQ45	241	0.282158	0.0746888	0.240664	0.136929	0.103734	0.0829876	0.0580913	0.0207469	212.409	34.627	451.714	0.106846	3.34871	0	0	0	0	0	0	0	0	0	0	0	0	2	1	1	0.0909091	0.991736	1	1	0.0495868	0.0495868	0	1	10	0	0	0	0	0	0	44	1	4	1	0
A0A1W2PQ64	194	0.28866	0.0773196	0.216495	0.139175	0.159794	0.0360825	0.0412371	0.0412371	220.621	31.9407	442.227	0.0111856	3.55268	0	12.3711	0	0	0	24	0	0	0	1	0	0	1	0	0	0	0	0	0	0.0820513	0.14359	0.261538	0	8	0	0	0	0	0	0	29	2	1	0	0
A0A1W2PQ67	120	0.25	0.075	0.208333	0.15	0.125	0.05	0.108333	0.0333333	215.194	31.6283	448.775	-0.0005	3.40233	0	0	0	0	0	0	0	0	0	0	0	0	0	0	0	0	0	1	1	0.0991736	0	0	0	3	0	0	0	0	0	0	19	0	0	0	0
A0A1W2PQ72	361	0.293629	0.0443213	0.252078	0.157895	0.127424	0.0498615	0.0554017	0.0193906	215.644	38.9183	479.837	-0.112465	3.22524	26.3158	6.09418	0	0	95	22	0	0	2	1	0	0	5	3	0	0	0	0	0	0.0773481	0.378453	0.533149	0	2	0	0	0	0	0	0	56	1	0	0	0
A0A1W2PQ73	354	0.262712	0.107345	0.169492	0.10452	0.0960452	0.135593	0.112994	0.0112994	203.138	35.9263	488.26	0.0946045	3.10429	27.6836	0	0	0	98	0	0	0	1	0	0	0	3	2	0	0	0	1	1	0.247887	0.543662	0.628169	0	13	0	0	0	0	0	0	58	1	0	0	0
A0A1W2PQ90	67	0.149254	0.0895522	0.238806	0.134328	0.0746269	0.119403	0.0895522	0.0895522	210.711	43.3667	433.212	-0.160455	3.2347	0	0	0	0	0	0	0	0	0	0	0	0	1	1	0	0	0	0	0	0	0	0	0	2	0	0	0	0	0	0	131	1	0	0	0
A0A1W2PQ98	310	0.254839	0.106452	0.212903	0.13871	0.0709677	0.0967742	0.0806452	0.0387097	209.753	39.8465	455.229	0.0881935	3.29526	0	0	0	0	0	0	0	0	0	0	0	0	0	0	1	0.0514469	0.993569	2	1	0.0771704	0.196141	0	1	12	0	0	0	0	0	0	41	1	1	0	0
A0A1W2PQC6	194	0.28866	0.0824742	0.21134	0.139175	0.159794	0.0360825	0.0412371	0.0412371	220.633	31.9938	440.593	0.0159794	3.56964	0	12.3711	0	0	0	24	0	0	0	1	0	0	0	0	0	0	0	0	0	0.0820513	0.14359	0.261538	0	8	0	0	0	0	0	0	28	2	1	0	0
A0A1W2PQD3	144	0.256944	0.104167	0.270833	0.145833	0.0833333	0.0347222	0.0833333	0.0208333	212.05	33.9125	479.632	0.102153	3.29118	0	0	0	0	0	0	0	0	0	0	0	0	0	0	0	0	0	0	0	0	0	0	0	7	0	0	0	0	0	0	17	4	4	0	0
A0A1W2PQD8	194	0.28866	0.0824742	0.21134	0.134021	0.159794	0.0360825	0.0412371	0.0463918	219.945	30.6227	441	0.0230928	3.54871	0	12.3711	0	0	0	24	0	0	0	1	0	0	0	0	0	0	0	0	0	0.0820513	0.14359	0.261538	0	8	0	0	0	0	0	0	26	2	1	0	0
A0A1W2PQE6	128	0.289062	0.0859375	0.226562	0.15625	0.117188	0.0703125	0.046875	0.0078125	219.343	32.5187	478.031	0.0308594	3.50758	0	0	0	0	0	0	0	0	0	0	0	0	1	0	0	0	0	1	1	0.108527	0	0	0	6	0	0	0	0	0	0	32	4	0	1	0
A0A1W2PQF4	536	0.264925	0.100746	0.264925	0.119403	0.104478	0.0485075	0.0746269	0.0223881	210.142	33.314	463.017	0.0886381	3.27603	0	0	0	0	0	0	0	0	0	0	0	0	0	0	1	0.0409683	0.996276	3	2	0.0484171	0.100559	0	0	27	0	0	0	0	0	0	0	3	2	0	0
A0A1W2PQF6	199	0.261307	0.0904523	0.221106	0.135678	0.105528	0.0753769	0.0904523	0.0201005	208.172	37.009	465.101	0.0757789	3.22307	0	0	0	0	0	0	0	0	0	0	0	0	1	0	0	0	0	2	1	0	0	0	0	10	0	0	0	0	0	0	27	3	1	1	0
A0A1W2PQF9	89	0.269663	0.0449438	0.191011	0.191011	0.146067	0.0898876	0.0674157	0	215.697	41.5697	454.596	-0.151461	3.35551	96.6292	0	0	0	86	0	0	0	1	0	0	0	3	3	0	0	0	0	0	0	0	0	0	1	0	0	0	0	0	0	0	3	1	0	0
A0A1W2PQG8	360	0.277778	0.0916667	0.241667	0.133333	0.0805556	0.0861111	0.0638889	0.025	209.919	38.4447	456.586	0.0781667	3.27711	17.7778	0	0	0	64	0	0	0	1	0	0	0	2	2	1	0.0443213	0.99446	2	1	0.033241	0	0	1	16	0	0	0	0	0	0	48	2	0	0	0
A0A1W2PQH9	124	0.282258	0.0806452	0.233871	0.145161	0.0725806	0.104839	0.0645161	0.016129	213.449	34.8871	462.54	0.234919	3.38726	0	0	0	0	0	0	0	0	0	0	0	0	0	0	0	0	0	0	0	0.28	0.592	0.392	0	3	0	0	0	0	0	0	0	1	1	0	0
A0A1W2PQJ5	194	0.28866	0.0773196	0.216495	0.139175	0.154639	0.0412371	0.0412371	0.0412371	220.563	32.1722	442.211	0.00572165	3.5468	0	12.3711	0	0	0	24	0	0	0	1	0	0	2	0	0	0	0	0	0	0.0615385	0.14359	0.266667	0	8	0	0	0	0	0	0	27	2	1	0	0
A0A1W2PQL4	384	0.171875	0.0807292	0.221354	0.25	0.109375	0.0364583	0.0598958	0.0703125	225.923	31.3422	438.203	-0.0628906	3.58674	0	0	0	0	0	0	0	0	0	0	0	0	1	0	0	0	0	8	2	0.0285714	0	0	0	10	0	0	0	0	0	0	38	2	0	1	0
A0A1W2PQM1	296	0.287162	0.0878378	0.226351	0.121622	0.097973	0.0810811	0.0777027	0.0202703	208.116	35.4976	457.662	0.117264	3.25797	0	0	0	0	0	0	0	0	0	0	0	0	2	0	1	0.0740741	0.993266	2	1	0	0.114478	0	1	17	0	0	0	0	0	0	35	4	0	1	1
A0A1W2PQN3	73	0.150685	0.0273973	0.273973	0.123288	0.246575	0.0821918	0.0273973	0.0684932	212.951	32.7192	443.534	-0.220274	3.18055	16.4384	0	0	0	12	0	0	0	0	0	0	0	2	1	0	0	0	0	0	0.351351	0.189189	0.189189	0	1	0	0	0	0	0	0	224	3	0	0	0
A0A1W2PQQ2	287	0.275261	0.0940767	0.216028	0.139373	0.10453	0.0662021	0.0836237	0.0209059	209.501	36.4	461.523	0.0805923	3.2862	0	0	0	0	0	0	0	0	0	0	0	0	0	0	1	0.0694444	0.993056	2	1	0	0	0	1	17	0	0	0	0	0	0	0	4	0	1	0
A0A1W2PQS6	291	0.302405	0.0893471	0.161512	0.178694	0.127148	0.0652921	0.0721649	0.00343643	218.385	36.6172	465.581	-0.0846392	3.50636	17.1821	0	0	0	50	0	0	0	1	0	0	0	1	1	0	0	0	1	1	0.0376712	0.273973	0.202055	0	7	0	0	0	0	0	0	47	4	3	0	1
A0A1W2PQU0	124	0.282258	0.0887097	0.233871	0.145161	0.0806452	0.0967742	0.0564516	0.016129	213.961	34.8048	458.661	0.240242	3.43395	0	0	0	0	0	0	0	0	0	0	0	0	0	0	0	0	0	0	0	0.128	0.384	0.384	0	4	0	0	0	0	0	0	22	1	1	0	0
A0A1W2PQU2	76	0.5	0.184211	0.210526	0.0263158	0.0131579	0.0263158	0.0263158	0.0131579	210.706	32.0355	483.816	0.925526	3.64592	0	0	0	0	0	0	0	0	0	0	0	0	0	0	2	0.584416	0.974026	0	0	0.480519	0.974026	0.974026	0	0	0	0	0	0	0	0	16	2	0	0	0
A0A1W2PQY0	241	0.278008	0.0746888	0.244813	0.136929	0.103734	0.0829876	0.0580913	0.0207469	212.299	34.6909	451.336	0.102033	3.3429	0	0	0	0	0	0	0	0	0	0	0	0	2	1	1	0.0909091	0.991736	1	1	0.0495868	0.0495868	0	1	10	0	0	0	0	0	0	0	1	4	1	0
A0A1W2PQZ7	204	0.25	0.0931373	0.264706	0.112745	0.102941	0.0784314	0.0784314	0.0196078	206.879	35.8461	466.157	0.0815196	3.19711	0	0	0	0	0	0	0	0	0	0	0	0	1	0	1	0.0780488	0.990244	1	1	0.0926829	0.160976	0	1	8	0	0	0	0	0	0	35	1	0	1	0
A0A1W2PR12	35	0.342857	0	0.0571429	0.0285714	0.342857	0.0571429	0.0571429	0.0857143	204.076	22.8824	479.706	-0.362353	2.83588	0	0	0	0	0	0	0	0	0	0	0	0	1	0	0	0	0	0	0	0.388889	0.805556	0	0	0	0	0	0	0	0	0	21	0	2	0	0
A0A1W2PR19	241	0.360996	0.107884	0.170124	0.153527	0.124481	0.0414938	0.0290456	0.0124481	218.146	29.2834	449.863	0.163568	3.64456	0	0	0	0	0	0	0	0	0	0	0	0	0	0	0	0	0	2	2	0	0	0	0	2	0	0	0	0	0	0	41	3	1	0	3
A0A1W2PR20	204	0.245098	0.0980392	0.259804	0.117647	0.0980392	0.0784314	0.0833333	0.0196078	206.587	36.9838	465.956	0.0753431	3.20064	14.7059	0	0	0	30	0	0	0	1	0	0	0	0	0	1	0.0780488	0.990244	1	1	0	0.160976	0	1	8	0	0	0	0	0	0	0	1	0	1	0
A0A1W2PR30	416	0.266827	0.0841346	0.264423	0.129808	0.0745192	0.09375	0.0625	0.0240385	208.746	39.1702	461.341	0.0727404	3.21	16.1058	0	0	0	67	0	0	0	1	0	0	0	2	2	2	0.0959233	0.995204	2	1	0.057554	0.182254	0.105516	0	13	0	0	0	0	0	0	48	3	1	0	0
A0A1W2PR48	441	0.287982	0.0793651	0.251701	0.113379	0.108844	0.0612245	0.0770975	0.0204082	210.549	35.6478	467.039	0.0279592	3.26159	25.3968	0	0	0	112	0	0	0	2	0	0	0	5	5	0	0	0	0	0	0.0995475	0.210407	0.337104	0	8	0	0	0	0	0	0	72	3	0	2	0
A0A1W2PR64	198	0.323232	0.030303	0.171717	0.166667	0.156566	0.0606061	0.0757576	0.0151515	214.552	36.4025	483.157	-0.124141	3.19566	50.5051	0	0	0	100	0	0	0	1	0	0	0	5	3	0	0	0	0	0	0.0653266	0.165829	0	0	4	0	0	0	0	0	0	21	0	1	0	0
A0A1W2PR75	194	0.293814	0.0824742	0.190722	0.149485	0.154639	0.0360825	0.0463918	0.0463918	220.785	32.0603	438.649	0.0357216	3.57742	0	10.8247	0	0	0	21	0	0	0	1	0	0	0	0	0	0	0	0	0	0.0974359	0.14359	0	0	6	0	0	0	0	0	0	26	3	1	0	0
A0A1W2PR77	199	0.271357	0.0904523	0.221106	0.125628	0.0854271	0.0904523	0.0904523	0.0251256	207.874	38.202	468.457	0.080201	3.20276	0	0	0	0	0	0	0	0	0	0	0	0	0	0	0	0	0	2	1	0	0	0	0	15	0	0	0	0	0	0	0	1	1	0	0
A0A1W2PR80	420	0.257143	0.0357143	0.280952	0.147619	0.0809524	0.116667	0.0666667	0.0142857	209.966	42.1248	481.7	-0.0611905	3.05326	85.7143	0	0	0	360	0	0	0	4	0	0	0	11	11	0	0	0	0	0	0.140143	0.327791	0.788599	0	0	0	0	0	0	0	0	52	3	1	0	0
A0A1W2PR82	267	0.243446	0.0674157	0.142322	0.11236	0.191011	0.123596	0.101124	0.0187266	208.549	37.9154	475.131	-0.121573	3.17813	26.9663	0	0	0	72	0	0	0	1	0	0	0	7	6	0	0	0	0	0	0.13806	0.257463	0.880597	0	4	0	0	0	0	0	0	52	0	1	0	0
A0A1W2PR95	340	0.276471	0.0735294	0.226471	0.164706	0.164706	0.0470588	0.0411765	0.00588235	219.63	30.6615	455.353	-0.0689412	3.52579	17.6471	0	0	0	60	0	0	0	1	0	0	0	4	3	0	0	0	0	0	0.131965	0.208211	0.120235	0	5	0	0	0	0	0	0	39	0	2	1	0
A0A1W2PRB8	838	0.309069	0.0704057	0.224344	0.144391	0.110979	0.0584726	0.0632458	0.0190931	214.84	30.7024	466.068	0.0483652	3.35897	3.69928	0	0	0	31	0	0	0	1	0	0	0	2	0	0	0	0	1	1	0.0238379	0.0738975	0.0441001	0	24	0	0	0	0	0	0	105	1	0	0	0
A0A1W2PRD3	253	0.280632	0.12253	0.205534	0.134387	0.0632411	0.0909091	0.0750988	0.027668	209.738	39.4221	454.087	0.155534	3.3681	0	0	0	0	0	0	0	0	0	0	0	0	0	0	1	0.0787402	0.992126	2	1	0.0472441	0	0	1	13	0	0	0	0	0	0	27	0	0	0	0
A0A1W2PRD5	423	0.257683	0.035461	0.286052	0.144208	0.0780142	0.115839	0.0685579	0.0141844	209.656	41.7217	483.291	-0.0567376	3.04035	85.5792	0	0	0	362	0	0	0	4	0	0	0	12	11	0	0	0	0	0	0.117925	0.318396	0.747642	0	0	0	0	0	0	0	0	0	3	1	0	0
A0A1W2PRD7	240	0.3	0.0833333	0.166667	0.175	0.170833	0.0375	0.05	0.0166667	221.854	29.5825	452.596	0.0254583	3.62854	0	0	0	0	0	0	0	0	0	0	0	0	2	1	0	0	0	1	1	0.0788382	0.186722	0.360996	0	0	0	0	0	0	0	0	67	2	0	0	0
A0A1W2PRE2	83	0.337349	0.0722892	0.289157	0.0722892	0.0843373	0.0361446	0.0843373	0.0240964	206.727	32.2265	478.47	0.236506	3.13675	0	0	0	0	0	0	0	0	0	0	0	0	0	0	0	0	0	0	0	0.166667	0.166667	0	0	1	0	0	0	0	0	0	12	4	0	0	0
A0A1W2PRE4	152	0.217105	0.0197368	0.164474	0.105263	0.0789474	0.223684	0.171053	0.0197368	197.179	48.0625	500	-0.193289	2.64947	100	0	0	0	152	0	0	0	1	0	0	0	3	3	0	0	0	0	0	0.418301	0.915033	0.915033	0	0	0	0	0	0	0	0	0	0	0	0	0
A0A1W2PRF3	423	0.257683	0.035461	0.283688	0.146572	0.0803783	0.113475	0.0685579	0.0141844	210.008	41.8853	483.598	-0.0604728	3.04801	85.5792	0	0	0	362	0	0	0	4	0	0	0	12	11	0	0	0	0	0	0.139151	0.325472	0.783019	0	0	0	0	0	0	0	0	0	3	1	0	0
A0A1W2PRF4	67	0.238806	0.164179	0.179104	0.119403	0.149254	0.0298507	0.0746269	0.0298507	213.338	34.7394	442.682	-0.0590909	3.61424	0	0	0	0	0	0	0	0	0	0	0	0	0	0	0	0	0	1	1	0	0	0	0	0	0	0	0	0	0	0	23	3	0	0	0
A0A1W2PRG0	241	0.356846	0.116183	0.149378	0.161826	0.120332	0.0456432	0.0290456	0.0207469	219.582	30.0548	444.083	0.155851	3.70149	0	0	0	0	0	0	0	0	0	0	0	0	0	0	0	0	0	2	2	0	0	0	0	2	0	0	0	0	0	0	42	1	0	1	0
A0A1W2PRG6	482	0.3361	0.126556	0.213693	0.112033	0.105809	0.033195	0.0580913	0.0145228	214.135	30.4558	457.214	0.181349	3.52475	0	0	0	0	0	0	0	0	0	0	0	0	0	0	3	0.126294	0.995859	1	1	0.0807453	0	0	0	8	0	0	0	0	0	0	73	1	2	0	1
A0A1W2PRJ4	32	0.28125	0.125	0.1875	0.1875	0.125	0.0625	0.03125	0	211.752	38.5406	415.688	-0.0328125	3.61563	0	0	0	0	0	0	0	0	0	0	0	0	0	0	0	0	0	0	0	0	0	0	0	0	0	0	0	0	0	0	131	0	1	0	0
A0A1W2PRK1	34	0.235294	0.0882353	0.176471	0.147059	0.235294	0.0588235	0.0588235	0	211.665	28.0529	441.706	-0.0858824	3.46618	0	0	0	0	0	0	0	0	0	0	0	0	2	0	0	0	0	0	0	0	0	0	0	0	0	0	0	0	0	0	4	2	0	1	0
A0A1W2PRK4	104	0.278846	0.0769231	0.201923	0.153846	0.144231	0.0673077	0.0769231	0	212.088	33.8019	473.317	-0.0645192	3.28212	0	0	0	0	0	0	0	0	0	0	0	0	1	0	0	0	0	0	0	0	0	0	0	2	0	0	0	0	0	0	0	0	0	0	0
A0A1W2PRM5	204	0.254902	0.0931373	0.259804	0.112745	0.102941	0.0784314	0.0784314	0.0196078	206.883	35.8225	467.382	0.0772059	3.19907	0	0	0	0	0	0	0	0	0	0	0	0	1	0	1	0.0780488	0.990244	1	1	0.0926829	0.160976	0	1	8	0	0	0	0	0	0	0	1	0	1	0
A0A1W2PRM7	423	0.257683	0.035461	0.286052	0.146572	0.0780142	0.113475	0.0685579	0.0141844	210.037	41.9326	483.329	-0.059409	3.04842	85.5792	0	0	0	362	0	0	0	4	0	0	0	12	11	0	0	0	0	0	0.139151	0.323113	0.747642	0	1	0	0	0	0	0	0	0	3	1	0	0
A0A1W2PRN0	386	0.274611	0.0932642	0.220207	0.158031	0.0647668	0.0829016	0.0854922	0.0207254	210.722	39.6541	453.816	0.115466	3.32194	0	0	0	0	0	0	0	0	0	0	0	0	0	0	1	0.0568475	0.994832	3	1	0.0387597	0.0930233	0	1	16	0	0	0	0	0	0	41	1	0	0	0
A0A1W2PRN6	198	0.328283	0.040404	0.176768	0.151515	0.161616	0.0606061	0.0707071	0.010101	213.801	32.2268	479.96	-0.105455	3.23172	50	0	0	0	99	0	0	0	1	0	0	0	5	3	0	0	0	0	0	0	0.155779	0	0	1	0	0	0	0	0	0	21	0	0	0	0
A0A1W2PRP0	233	0.218884	0.111588	0.175966	0.154506	0.103004	0.11588	0.103004	0.0171674	211.373	40.5893	461.159	-0.0612446	3.32751	32.1888	0	0	0	75	0	0	0	1	0	0	0	5	4	0	0	0	1	1	0.235043	0.25641	0.25641	0	11	0	0	0	0	0	0	45	2	0	1	1
A0A1W2PRQ8	180	0.338889	0.0444444	0.238889	0.161111	0.138889	0.0222222	0.05	0.00555556	222.341	34.9833	468.35	-0.0886111	3.50144	0	11.6667	0	0	0	21	0	0	0	1	0	0	1	1	0	0	0	0	0	0.0828729	0.314917	0.900552	0	0	0	0	0	0	0	0	17	1	2	1	0
A0A1W2PRR8	274	0.277372	0.0839416	0.218978	0.145985	0.0693431	0.0875912	0.080292	0.0364964	210.665	37.6788	460.051	0.125073	3.26755	0	0	0	0	0	0	0	0	0	0	0	0	1	0	1	0.0581818	0.992727	2	1	0.0981818	0.225455	0	0	13	0	0	0	0	0	0	0	1	0	0	0
A0A1W2PRS3	328	0.277439	0.0884146	0.210366	0.128049	0.0945122	0.0914634	0.0853659	0.0243902	208.146	36.9924	465.317	0.0757012	3.22485	0	0	0	0	0	0	0	0	0	0	0	0	0	0	0	0	0	5	2	0	0	0	0	25	0	0	0	0	0	0	56	4	0	1	0
A0A1W2PRU2	124	0.241935	0.0887097	0.241935	0.16129	0.0725806	0.112903	0.0645161	0.016129	213.241	36.9323	461.524	0.170968	3.37444	0	0	0	0	0	0	0	0	0	0	0	0	3	1	0	0	0	0	0	0.304	0.384	0	0	9	0	0	0	0	0	0	27	1	1	0	0
A0A1W2PRV1	198	0.328283	0.030303	0.171717	0.166667	0.156566	0.0555556	0.0757576	0.0151515	214.612	35.5884	485.217	-0.11298	3.19525	50.5051	0	0	0	100	0	0	0	1	0	0	0	4	3	0	0	0	0	0	0.0653266	0.165829	0	0	3	0	0	0	0	0	0	19	0	0	0	0
A0A1W2PRX2	142	0.295775	0.112676	0.197183	0.140845	0.0774648	0.0492958	0.0774648	0.0492958	212.972	42.319	462.972	0.0944366	3.36563	0	0	0	0	0	0	0	0	0	0	0	0	0	0	0	0	0	0	0	0	0.181818	0	0	3	0	0	0	0	0	0	17	3	0	0	0
A0A1W2PS06	134	0.208955	0.0447761	0.186567	0.208955	0.276119	0.0149254	0.0447761	0.00746269	224.227	25.4316	476.286	-0.382556	3.4806	42.5373	3.73134	0	0	57	5	0	0	1	0	0	0	4	1	0	0	0	1	1	0.407407	0.562963	0.703704	0	0	0	0	0	0	0	0	33	3	0	0	0
A0A1W2PS18	150	0.306667	0.113333	0.226667	0.0266667	0.0733333	0.153333	0.0933333	0.00666667	196.612	32.9647	474.807	0.1852	3.01393	40.6667	0	0	0	61	0	0	0	1	0	0	0	1	1	2	0.264901	0.986755	0	0	0.384106	0.377483	0.721854	0	5	0	0	0	0	0	0	31	0	0	0	0
A0A1W2PS29	197	0.319797	0.0507614	0.213198	0.121827	0.0964467	0.071066	0.0862944	0.0406091	210.53	36.2223	488.188	-0.0305584	3.1031	0	0	0	0	0	0	0	0	0	0	0	0	0	0	0	0	0	1	1	0.0656566	0.252525	0.252525	1	3	0	0	0	0	0	0	28	4	0	0	1
A0A1W2PS55	563	0.22913	0.0550622	0.261101	0.175844	0.131439	0.062167	0.0550622	0.0301954	215.938	30.6053	475.384	-0.0225933	3.25764	20.071	0	0	0	113	0	0	0	3	0	0	0	12	5	0	0	0	1	1	0.0691489	0.200355	0.0886525	0	13	0	0	0	0	0	0	7	1	0	0	0
A0A1W2PS79	157	0.178344	0.0318471	0.216561	0.267516	0.191083	0.0254777	0.0828025	0.00636943	230.072	26.7197	482.828	-0.308599	3.54904	31.8471	0	0	0	50	0	0	0	1	0	0	0	2	1	0	0	0	0	0	0.506329	0.506329	0.506329	0	0	0	0	0	0	0	0	40	2	0	0	0
A0A1X7SBZ7	531	0.305085	0.109228	0.205273	0.154426	0.120527	0.039548	0.0414313	0.0244821	221.204	29.9467	456.992	0.182618	3.66386	0	0	0	0	0	0	0	0	0	0	0	0	0	0	0	0	0	2	2	0	0.0469925	0	0	7	0	0	0	0	0	0	123	4	4	0	0
A0A1Y8EI39	7	0	0.428571	0.428571	0	0	0	0.142857	0	192.199	38.3286	452.714	0.351429	3.68857	0	0	0	0	0	0	0	0	0	0	0	0	0	0	0	0	0	0	0	0	0	0	0	0	0	0	0	0	0	0	1	1	0	1	0
A0A1Y8EKQ5	7	0	0.428571	0.285714	0	0	0	0.285714	0	185.604	41.2143	469	0.262857	3.46	0	0	0	0	0	0	0	0	0	0	0	0	0	0	0	0	0	0	0	0	0	0	0	1	0	0	0	0	0	0	1	1	0	0	0
A0A286YEE6	296	0.344595	0.0608108	0.266892	0.0810811	0.0574324	0.101351	0.0743243	0.0135135	207.761	36.4061	475.936	0.165236	3.16088	0	0	0	0	0	0	0	0	0	0	0	0	1	0	1	0.0808081	0.993266	0	0	0.225589	0.367003	0.340067	1	14	0	0	0	0	0	0	42	2	1	0	0
A0A286YES4	224	0.339286	0.125	0.209821	0.138393	0.0535714	0.0401786	0.0535714	0.0357143	214.953	35.3484	446.735	0.271749	3.53462	0	0	0	0	0	0	0	0	0	0	0	0	0	0	4	0.315556	0.991111	1	1	0	0	0	0	2	0	0	0	0	0	0	40	1	0	0	3
A0A286YET3	283	0.328622	0.0777385	0.173145	0.123675	0.0989399	0.109541	0.0848057	0.00353357	212.787	38.1261	462.131	0.0890106	3.39261	0	0	0	0	0	0	0	0	0	0	0	0	0	0	0	0	0	0	0	0	0.147887	0.538732	0	13	0	0	0	0	0	0	43	1	0	0	0
A0A286YEU6	314	0.429936	0.10828	0.171975	0.101911	0.044586	0.0636943	0.0573248	0.022293	208.111	39.0061	490.089	0.254459	3.25662	0	0	0	0	0	0	0	0	0	0	0	0	0	0	7	0.48254	0.993651	1	1	0.209524	0.619048	0.847619	0	2	0	0	0	0	0	0	31	0	0	0	0
A0A286YEV6	105	0.0380952	0.0190476	0.142857	0.0857143	0	0.0190476	0.32381	0.371429	195.436	35.0619	454.905	-0.291905	2.05781	0	0	0	0	0	0	0	0	0	0	0	0	0	0	0	0	0	0	0	0.943396	0.981132	0.981132	0	2	0	0	0	0	0	0	2	0	0	0	0
A0A286YEX6	415	0.385542	0.13253	0.204819	0.0915663	0.0578313	0.0433735	0.0506024	0.0337349	213.652	31.3084	449.014	0.338313	3.54716	0	0	0	0	0	0	0	0	0	0	0	0	0	0	8	0.447115	0.995192	1	1	0.0865385	0.0600962	0	0	6	0	0	0	0	0	0	49	0	1	0	1
A0A286YEX9	47	0.0212766	0.0212766	0.0851064	0.0425532	0	0	0.553191	0.276596	171.409	44.7489	529.128	-0.255532	1.34362	0	0	0	0	0	0	0	0	0	0	0	0	0	0	0	0	0	0	0	0.833333	0.833333	0.833333	0	0	0	0	0	0	0	0	1	1	1	0	0
A0A286YEY9	88	0.0454545	0.0227273	0.159091	0.102273	0	0.0227273	0.25	0.397727	203.781	32.5216	428.682	-0.285227	2.3267	0	0	0	0	0	0	0	0	0	0	0	0	0	0	0	0	0	0	0	0.865169	0.977528	0.977528	0	2	0	0	0	0	0	0	5	2	2	1	0
A0A286YF01	96	0.0416667	0.0104167	0.145833	0.0833333	0	0.0208333	0.3125	0.385417	196.097	33.8094	449.875	-0.292604	2.05219	0	0	0	0	0	0	0	0	0	0	0	0	0	0	0	0	0	0	0	0.917526	0.979381	0.979381	0	1	0	0	0	0	0	0	2	1	2	0	0
A0A286YF18	149	0.342282	0.0805369	0.0939597	0.0939597	0.154362	0.147651	0.0872483	0	204.492	36.8966	485.242	-0.0233557	3.1602	20.8054	0	0	0	31	0	0	0	1	0	0	0	2	2	1	0.14	0.986667	0	0	0.393333	0.813333	0.966667	0	5	0	0	0	0	0	0	25	4	0	0	0
A0A286YF32	110	0.354545	0.0909091	0.172727	0.145455	0.0818182	0.0636364	0.0727273	0.0181818	211.583	38.8436	443.355	0.104182	3.42991	0	0	0	0	0	0	0	0	0	0	0	0	0	0	0	0	0	1	1	0	0	0	0	2	0	0	0	0	0	0	12	0	0	0	0
A0A286YF46	85	0.0470588	0.0117647	0.152941	0.0941176	0	0.0235294	0.258824	0.411765	202.218	31.5824	428.906	-0.290588	2.24176	0	0	0	0	0	0	0	0	0	0	0	0	0	0	0	0	0	0	0	0.883721	0.976744	0.976744	0	1	0	0	0	0	0	0	2	0	2	0	0
A0A286YF48	153	0.313725	0.0784314	0.215686	0.0784314	0.0980392	0.0718954	0.0915033	0.0522876	205.097	33.1882	470.248	0.0702614	3.07725	0	0	0	0	0	0	0	0	0	0	0	0	0	0	0	0	0	1	1	0	0.24026	0	1	7	0	0	0	0	0	0	10	0	0	0	0
A0A286YF49	123	0.235772	0.0731707	0.260163	0.138211	0.0813008	0.0813008	0.105691	0.0243902	209.547	40.1366	468.098	-0.0207317	3.1648	0	0	0	0	0	0	0	0	0	0	0	0	4	3	0	0	0	0	0	0	0.233871	0	0	2	0	0	0	0	0	0	0	3	0	0	0
A0A286YF58	385	0.34026	0.0467532	0.158442	0.124675	0.0649351	0.0961039	0.12987	0.038961	202.364	43.9914	516.564	-0.0591948	2.78382	28.0519	0	0	0	108	0	0	0	2	0	0	0	2	2	3	0.178756	0.994819	0	0	0.5	0.660622	0.766839	1	6	0	0	0	0	0	0	43	2	2	1	0
A0A286YF60	100	0.05	0.01	0.14	0.1	0	0.02	0.29	0.39	200.266	34.766	442.8	-0.3136	2.1713	0	0	0	0	0	0	0	0	0	0	0	0	0	0	0	0	0	0	0	0.920792	0.980198	0.980198	0	1	0	0	0	0	0	0	2	0	0	0	0
A0A286YF76	167	0.299401	0.107784	0.233533	0.101796	0.125749	0.0479042	0.0479042	0.0299401	215.521	27.4181	451.861	0.113735	3.51428	0	0	0	0	0	0	0	0	0	0	0	0	0	0	0	0	0	0	0	0	0	0	0	4	0	0	0	0	0	0	0	1	1	0	0
A0A286YF77	105	0.0380952	0.00952381	0.142857	0.104762	0	0.0190476	0.304762	0.380952	198.281	33.0533	447.076	-0.306286	2.11857	0	0	0	0	0	0	0	0	0	0	0	0	0	0	0	0	0	0	0	0.839623	0.981132	0.981132	0	3	0	0	0	0	0	0	3	0	0	0	0
A0A286YFA0	54	0.203704	0.037037	0.333333	0.185185	0.111111	0.0555556	0.0555556	0	219.991	39.5075	480.547	-0.223774	3.28019	98.1481	0	0	0	53	0	0	0	1	0	0	0	1	1	0	0	0	0	0	0	0	0	0	0	0	0	0	0	0	0	0	0	1	0	0
A0A286YFB0	141	0.333333	0.0780142	0.191489	0.212766	0.070922	0.0283688	0.0567376	0.0283688	223.839	40.7972	456.816	0.103475	3.58319	0	0	0	0	0	0	0	0	0	0	0	0	1	0	0	0	0	0	0	0	0	0	0	3	0	0	0	0	0	0	0	2	2	0	0
A0A286YFB4	120	0.0333333	0.00833333	0.116667	0.0833333	0	0.0166667	0.375	0.366667	190.549	36.8617	466.808	-0.309333	1.87342	0	0	0	0	0	0	0	0	0	0	0	0	0	0	0	0	0	0	0	0.950413	0.983471	0.983471	0	4	0	0	0	0	0	0	2	0	0	0	0
A0A286YFD6	374	0.320856	0.101604	0.165775	0.144385	0.144385	0.0614973	0.0481283	0.013369	217.508	33.5925	455.31	0.0648396	3.56575	0	0	0	0	0	0	0	0	0	0	0	0	2	0	1	0.056	0.994667	0	0	0.032	0	0	0	5	0	0	0	0	0	0	57	3	1	0	0
A0A286YFG1	108	0.037037	0.0185185	0.157407	0.0833333	0	0.0185185	0.314815	0.37037	196.028	33.2269	452.083	-0.296944	2.0837	0	0	0	0	0	0	0	0	0	0	0	0	0	0	0	0	0	0	0	0.926606	0.981651	0.981651	0	2	0	0	0	0	0	0	4	0	0	0	0
A0A286YFK9	51	0.372549	0.0980392	0.156863	0.117647	0.0588235	0.0980392	0.0784314	0.0196078	216.894	36.9824	467.549	0.263333	3.54314	0	0	0	0	0	0	0	0	0	0	0	0	0	0	1	0.423077	0.961538	0	0	0.288462	0	0	0	1	0	0	0	0	0	0	4	0	0	0	0
A0A286YFN4	46	0.434783	0.130435	0.152174	0.0652174	0.0652174	0.0434783	0.0434783	0.0652174	209.717	31.6152	446.065	0.331304	3.40935	0	0	0	0	0	0	0	0	0	0	0	0	0	0	0	0	0	1	1	0	0	0	1	0	0	0	0	0	0	0	7	2	0	1	0
A0A2C9F2N4	1216	0.245066	0.078125	0.252467	0.129934	0.150493	0.0674342	0.0649671	0.0115132	212.463	36.5123	462.644	-0.0396875	3.30523	43.0921	0	0	0	524	0	0	0	4	0	0	0	18	12	0	0	0	3	2	0.0484799	0.298274	0.266228	0	14	0	0	0	0	0	0	0	1	2	0	0
A0A539	114	0.298246	0.0789474	0.245614	0.140351	0.0701754	0.0614035	0.0438596	0.0614035	214.814	28.6184	442.096	0.213684	3.42219	0	0	0	0	0	0	0	0	0	0	0	0	0	0	0	0	0	1	1	0.13913	0	0	1	3	0	0	0	0	0	0	18	1	0	0	0
A0A576	114	0.289474	0.0964912	0.254386	0.131579	0.0877193	0.0438596	0.0438596	0.0526316	215.793	24.7044	449.123	0.177105	3.44579	0	0	0	0	0	0	0	0	0	0	0	0	0	0	0	0	0	1	1	0.104348	0	0	1	5	0	0	0	0	0	0	21	2	0	1	0
A0A577	114	0.324561	0.0701754	0.210526	0.149123	0.0789474	0.0701754	0.0350877	0.0614035	216.19	27.3079	448.404	0.179561	3.42763	0	0	0	0	0	0	0	0	0	0	0	0	0	0	0	0	0	1	1	0.226087	0	0	1	3	0	0	0	0	0	0	19	1	0	0	1
A0A578	114	0.254386	0.105263	0.307018	0.105263	0.0438596	0.0438596	0.105263	0.0350877	211.527	37.8114	474.219	0.178158	3.28965	0	0	0	0	0	0	0	0	0	0	0	0	0	0	0	0	0	1	1	0.0869565	0	0	1	5	0	0	0	0	0	0	19	2	0	0	0
A0A584	115	0.347826	0.0869565	0.217391	0.113043	0.0869565	0.0434783	0.0695652	0.0347826	213.739	31.5809	478.252	0.0845217	3.33252	0	0	0	0	0	0	0	0	0	0	0	0	0	0	0	0	0	1	1	0.12069	0	0	1	3	0	0	0	0	0	0	16	1	0	0	0
A0A589	114	0.315789	0.0701754	0.22807	0.140351	0.0789474	0.0614035	0.0438596	0.0614035	215.022	29.6746	446.114	0.198333	3.40772	0	0	0	0	0	0	0	0	0	0	0	0	0	0	0	0	0	1	1	0.13913	0	0	1	3	0	0	0	0	0	0	18	1	0	0	0
A0A597	114	0.289474	0.105263	0.245614	0.0964912	0.0614035	0.0614035	0.105263	0.0350877	209.773	35.4202	472.781	0.13614	3.27518	0	0	0	0	0	0	0	0	0	0	0	0	0	0	0	0	0	1	1	0.0869565	0.217391	0	1	3	0	0	0	0	0	0	15	2	0	0	1
A0A599	114	0.280702	0.105263	0.254386	0.0877193	0.0789474	0.0526316	0.105263	0.0350877	208.411	34.4754	469.579	0.13886	3.25368	0	0	0	0	0	0	0	0	0	0	0	0	0	0	0	0	0	1	1	0.130435	0.217391	0	1	4	0	0	0	0	0	0	9	2	0	0	0
A0A5A2	114	0.289474	0.114035	0.245614	0.0877193	0.0789474	0.0614035	0.0964912	0.0263158	210.419	36.3096	471	0.208158	3.35807	0	0	0	0	0	0	0	0	0	0	0	0	0	0	0	0	0	1	1	0.104348	0.217391	0	1	4	0	0	0	0	0	0	14	2	0	0	0
A0A5A6	115	0.33913	0.0956522	0.182609	0.104348	0.130435	0.0521739	0.0608696	0.0347826	215.219	29.4235	469.009	0.068	3.44748	0	0	0	0	0	0	0	0	0	0	0	0	0	0	0	0	0	1	1	0	0	0	1	1	0	0	0	0	0	0	17	1	0	0	0
A0A5B0	115	0.295652	0.0869565	0.226087	0.147826	0.104348	0.0347826	0.0782609	0.026087	214.934	33.2104	469.774	0.0856522	3.37774	0	0	0	0	0	0	0	0	0	0	0	0	1	0	0	0	0	1	1	0.112069	0	0	1	4	0	0	0	0	0	0	18	2	0	1	0
A0A5B6	114	0.315789	0.114035	0.184211	0.149123	0.122807	0.0175439	0.0614035	0.0350877	219.813	31.2912	460.781	0.0829825	3.59675	0	0	0	0	0	0	0	0	0	0	0	0	0	0	0	0	0	1	1	0	0	0	1	0	0	0	0	0	0	0	15	2	0	0	0
A0A5B7	111	0.324324	0.0810811	0.342342	0.0540541	0.0720721	0.045045	0.0540541	0.027027	209.298	31.2288	466.676	0.284955	3.24189	0	0	0	0	0	0	0	0	0	0	0	0	0	0	0	0	0	1	1	0.107143	0	0	1	7	0	0	0	0	0	0	17	1	0	0	0
A0A5B9	178	0.308989	0.101124	0.235955	0.117978	0.11236	0.0505618	0.0505618	0.0224719	212.92	33.7191	467.775	-0.00898876	3.38135	0	0	0	0	0	0	0	0	0	0	0	0	0	0	1	0.122905	0.988827	1	1	0.0949721	0	0	0	9	0	0	1	0	0	0	13	1	1	0	1
A0AUZ9	987	0.259372	0.0678825	0.289767	0.163121	0.118541	0.0486322	0.0334347	0.0192503	218.985	30.0528	461.567	0.0667781	3.45664	3.14083	0	0	0	31	0	0	0	1	0	0	0	13	4	0	0	0	0	0	0.0759109	0.213563	0.374494	0	34	0	7	9	0	2	0	132	2	2	1	4
A0AV02	714	0.359944	0.106443	0.219888	0.0770308	0.0784314	0.047619	0.0910364	0.0196078	207.75	33.8927	475.181	0.236933	3.28235	0	0	0	0	0	0	0	0	0	0	0	0	2	2	12	0.351049	0.997203	0	0	0.0657343	0.271329	0.232168	0	11	1	6	3	0	0	0	71	1	0	0	3
A0AV96	593	0.350759	0.0910624	0.148398	0.123103	0.104553	0.0775717	0.0910624	0.0134907	207.292	34.9513	478.543	-0.0860202	3.15749	0	0	0	0	0	0	0	0	0	0	0	0	2	2	0	0	0	3	1	0.176768	0.30303	0.409091	0	15	0	14	1	11	0	0	73	0	0	1	9
A0AVF1	554	0.326715	0.119134	0.184116	0.146209	0.129964	0.0234657	0.0505415	0.0198556	218.894	28.8377	458.493	0.0901986	3.61388	0	3.79061	0	0	0	21	0	0	0	1	0	0	0	0	0	0	0	0	0	0.0198198	0.14955	0	0	8	4	2	8	0	0	0	109	1	0	0	4
A0AVI2	2057	0.284395	0.111813	0.20175	0.143899	0.111813	0.0748663	0.0534759	0.0179874	218.151	31.4801	444.999	0.10878	3.62398	0	0	0	0	0	0	0	0	0	0	0	0	3	0	1	0.0102041	0.999028	6	1	0.0228377	0.0709427	0	0	50	0	5	0	1	0	0	363	0	0	0	4
A0AVI4	362	0.361878	0.0966851	0.207182	0.11326	0.0801105	0.0552486	0.0359116	0.0497238	213.723	36.4798	459.448	0.0912983	3.3942	0	0	0	0	0	0	0	0	0	0	0	0	0	0	3	0.173554	0.99449	0	0	0	0.0688705	0	0	7	0	2	0	0	0	0	39	0	1	0	2
A0AVK6	867	0.283737	0.0484429	0.266436	0.141869	0.100346	0.0911188	0.0553633	0.0126874	212.055	32.5414	478.774	0.0283276	3.17946	33.3333	0	0	0	289	0	0	0	5	0	0	0	17	14	0	0	0	0	0	0	0.266129	0.544931	0	15	1	28	6	0	0	0	130	1	2	0	1
A0AVT1	1052	0.308935	0.0865019	0.212928	0.135932	0.129278	0.0532319	0.0513308	0.0218631	214.743	29.7448	463.573	0.0825	3.3982	0	0	0	0	0	0	0	0	0	0	0	0	0	0	0	0	0	0	0	0.014245	0	0	0	14	11	15	35	0	1	0	161	0	1	0	2
A0FGR8	921	0.313789	0.0618893	0.207383	0.155266	0.109663	0.0662324	0.0760043	0.00977199	216.221	35.8787	475.899	0.0504235	3.35527	22.9099	0	0	0	211	0	0	0	3	0	0	0	11	8	2	0.0466377	0.997831	4	2	0.0737527	0.367679	0.531453	0	14	0	28	18	0	0	0	158	0	2	0	2
A0FGR9	886	0.301354	0.0801354	0.198646	0.147856	0.116253	0.0722348	0.0598194	0.023702	217.989	33.8749	466.915	0.0719639	3.46597	8.35214	0	0	0	74	0	0	0	1	0	0	0	4	3	1	0.0248027	0.997745	4	2	0.0789177	0.215333	0.306652	0	15	0	4	0	0	0	0	176	2	1	0	1
A0JD32	116	0.293103	0.137931	0.310345	0.0775862	0.0948276	0.0344828	0.0172414	0.0344828	212.235	29.2293	446.466	0.112845	3.48172	0	0	0	0	0	0	0	0	0	0	0	0	0	0	0	0	0	1	1	0	0	0	1	3	0	0	0	0	0	0	20	1	0	0	0
A0JD36	115	0.321739	0.113043	0.2	0.113043	0.104348	0.0434783	0.0782609	0.026087	212.451	30.5174	454.183	0.13913	3.41322	0	0	0	0	0	0	0	0	0	0	0	0	0	0	0	0	0	1	1	0	0	0	1	4	0	0	0	0	0	0	17	2	0	1	0
A0JD37	113	0.247788	0.185841	0.256637	0.0973451	0.0973451	0.0353982	0.0530973	0.0265487	211.65	34.7115	451.274	0.130708	3.54832	0	0	0	0	0	0	0	0	0	0	0	0	0	0	0	0	0	1	1	0	0	0	1	2	0	0	0	0	0	0	28	0	1	1	0
A0JLT2	244	0.192623	0.045082	0.213115	0.196721	0.0901639	0.159836	0.0901639	0.0122951	211.128	33.4455	473.738	-0.00885246	3.13381	75.4098	0	0	0	184	0	0	0	3	0	0	0	6	6	0	0	0	0	0	0.322449	0.493878	0.493878	0	3	33	7	0	0	0	0	50	7	0	0	1
A0JNW5	1464	0.286202	0.067623	0.280055	0.138661	0.127049	0.045765	0.0375683	0.0170765	215.203	28.8924	462.543	0.0940027	3.36134	7.78689	3.07377	0	0	114	45	0	0	3	1	0	0	13	7	0	0	0	0	0	0.0716724	0.120819	0.206143	0	41	5	53	5	1	0	0	189	0	0	0	7
A0JP26	581	0.271945	0.0413081	0.230637	0.177281	0.156627	0.0275387	0.0567986	0.0378657	219.684	27.6776	461.119	-0.0461446	3.38126	24.2685	3.61446	0	0	141	21	0	0	1	1	0	0	5	4	0	0	0	0	0	0	0.135739	0.386598	0	8	26	4	1	0	0	0	60	2	0	0	5
A0M8Q6	106	0.264151	0.0660377	0.301887	0.122642	0.0849057	0.0849057	0.0471698	0.0283019	206.832	31.6396	495.462	-0.107547	3.00613	0	0	0	0	0	0	0	0	0	0	0	0	2	1	0	0	0	1	1	0	0	0	0	6	1	0	0	0	0	0	13	0	0	0	0
A0MZ66	631	0.266244	0.0174326	0.250396	0.172742	0.191759	0.0602219	0.0269414	0.0142631	222.635	25.1499	469.187	-0.128067	3.41995	42.1553	25.3566	0	0	266	160	0	0	2	4	0	0	11	9	0	0	0	0	0	0.0981013	0.468354	0.591772	0	2	6	30	9	1	2	0	102	1	1	0	0
A0N4X2	20	0.25	0.15	0.3	0.15	0	0	0.15	0	212.573	35.48	518.85	0.295	3.255	0	0	0	0	0	0	0	0	0	0	0	0	0	0	0	0	0	0	0	0	0	0	0	0	0	0	0	0	0	0	5	0	4	0	0
A0N4X5	19	0.210526	0.157895	0.315789	0.105263	0.0526316	0.0526316	0.105263	0	213.212	34.1474	469.316	0.29	3.47105	0	0	0	0	0	0	0	0	0	0	0	0	0	0	0	0	0	0	0	0	0	0	0	0	0	0	0	0	0	0	4	0	0	0	0
A0N4Z3	17	0.235294	0.176471	0.294118	0.117647	0	0.0588235	0.117647	0	209.172	40.7941	489.176	0.391176	3.34529	0	0	0	0	0	0	0	0	0	0	0	0	0	0	0	0	0	0	0	0	0	0	0	0	0	0	0	0	0	0	2	2	2	0	0
A0N4Z7	21	0.285714	0.047619	0.285714	0.0952381	0.047619	0	0.238095	0	204.997	29.9476	540.762	0.339524	2.83381	0	0	0	0	0	0	0	0	0	0	0	0	0	0	0	0	0	0	0	0	0	0	0	1	0	0	0	0	0	0	2	0	3	0	0
A0N4Z8	20	0.25	0.15	0.2	0.15	0	0	0.25	0	200.136	43.585	537.05	0.163	2.8545	0	0	0	0	0	0	0	0	0	0	0	0	0	0	0	0	0	0	0	0	0	0	0	0	0	0	0	0	0	0	3	0	3	0	0
A0PG75	271	0.298893	0.099631	0.232472	0.0885609	0.099631	0.0701107	0.0701107	0.0405904	210.739	30.3458	458.089	0.165424	3.319	0	0	0	0	0	0	0	0	0	0	0	0	1	0	0	0	0	0	0	0.0625	0.198529	0.242647	0	6	0	0	0	0	0	0	40	1	0	0	0
A0PJE2	317	0.318612	0.0757098	0.211356	0.14511	0.113565	0.0473186	0.0788644	0.00946372	213.032	35.2274	470.754	0.0157729	3.31366	0	0	0	0	0	0	0	0	0	0	0	0	2	1	0	0	0	0	0	0.0754717	0.081761	0	0	11	0	0	0	0	0	0	44	0	1	0	1
A0PJK1	596	0.424497	0.105705	0.192953	0.0704698	0.0536913	0.0469799	0.0872483	0.0184564	205.514	35.8913	479.128	0.273641	3.21545	0	0	0	0	0	0	0	0	0	0	0	0	0	0	14	0.495812	0.99665	0	0	0.078727	0.309883	0.269682	0	12	0	9	0	0	0	0	56	0	2	0	0
A0PJW6	202	0.371287	0.0990099	0.148515	0.138614	0.0445545	0.0742574	0.10396	0.019802	211.211	43.1243	483.554	0.125792	3.3047	0	0	0	0	0	0	0	0	0	0	0	0	0	0	2	0.216749	0.990148	0	0	0.17734	0.374384	0.527094	0	4	29	0	0	0	0	0	22	0	0	0	2
A0PJW8	107	0.336449	0.0373832	0.186916	0.214953	0.0841121	0.0747664	0.0560748	0.00934579	220.388	30.6654	475.271	-0.0230841	3.37187	39.2523	0	0	0	42	0	0	0	1	0	0	0	4	0	0	0	0	0	0	0	0	0	0	1	0	4	0	0	0	0	9	0	0	0	3
A0PJX0	185	0.297297	0.124324	0.194595	0.118919	0.167568	0.0324324	0.0324324	0.0324324	216.572	29.6584	427.654	0.204324	3.66184	0	0	0	0	0	0	0	0	0	0	0	0	0	0	0	0	0	3	1	0.0806452	0.290323	0.290323	0	2	1	0	0	0	0	0	19	4	0	0	0
A0PJX2	215	0.246512	0.116279	0.232558	0.0930233	0.134884	0.0604651	0.0976744	0.0186047	208.518	37.9521	469.912	0.0772558	3.30619	18.6047	0	0	0	40	0	0	0	1	0	0	0	1	1	0	0	0	1	1	0.087963	0.361111	0.518519	0	9	5	1	0	0	0	0	24	0	0	0	1
A0PJX4	238	0.268908	0.0966387	0.239496	0.0882353	0.0714286	0.10084	0.0756303	0.0588235	207.209	37.6273	459.235	0.0962185	3.16866	0	0	0	0	0	0	0	0	0	0	0	0	2	2	1	0.104603	0.991632	0	0	0.179916	0.376569	0.481172	1	8	0	6	0	0	0	0	32	2	0	2	0
A0PJX8	343	0.408163	0.0699708	0.206997	0.090379	0.0553936	0.0524781	0.0874636	0.0291545	210.912	36.8213	491.431	0.272974	3.25146	0	0	0	0	0	0	0	0	0	0	0	0	0	0	9	0.456395	0.994186	0	0	0.25	0.793605	0.831395	0	4	0	0	0	0	0	0	32	5	1	0	0
A0PJY2	475	0.265263	0.0715789	0.210526	0.183158	0.0547368	0.109474	0.0631579	0.0421053	212.421	34.4981	457.156	0.0511789	3.25406	11.5789	0	0	0	55	0	0	0	1	0	0	0	5	5	0	0	0	0	0	0.12605	0.216387	0.268908	0	14	0	0	0	0	0	0	63	0	1	0	1
A0PJZ0	165	0.351515	0.0606061	0.169697	0.187879	0.121212	0.0121212	0.0666667	0.030303	218.481	33.0121	475.867	-0.0141212	3.36273	0	0	0	0	0	0	0	0	0	0	0	0	0	0	0	0	0	0	0	0	0	0	0	0	0	0	0	0	0	0	22	0	0	0	0
A0PJZ3	443	0.325056	0.110609	0.151242	0.171558	0.0857788	0.0902935	0.0496614	0.0158014	219.216	37.4242	450.194	0.0974718	3.63499	13.544	0	0	0	60	0	0	0	1	0	0	0	0	0	0	0	0	0	0	0.171171	0.238739	0.27027	1	8	8	5	0	0	0	0	5	0	1	0	2
A0PK00	339	0.309735	0.147493	0.20944	0.153392	0.0914454	0.0147493	0.0471976	0.0265487	222.962	31.7926	448.982	0.211888	3.82938	0	17.6991	0	0	0	60	0	0	0	2	0	0	0	0	6	0.326471	0.994118	0	0	0.0558824	0.329412	0.247059	0	1	12	0	0	0	0	0	44	0	2	0	2
A0PK05	275	0.341818	0.0945455	0.221818	0.0981818	0.0872727	0.0654545	0.0690909	0.0218182	208.688	32.0909	483.382	0.201964	3.23596	10.9091	0	0	0	30	0	0	0	1	0	0	0	3	2	4	0.278986	0.992754	0	0	0.0652174	0.144928	0.144928	0	2	0	0	2	0	0	0	33	3	1	0	0
A0PK11	232	0.448276	0.112069	0.150862	0.0905172	0.0732759	0.0301724	0.0732759	0.0215517	209.66	32.5078	482.034	0.218103	3.34384	0	0	0	0	0	0	0	0	0	0	0	0	0	0	4	0.39485	0.991416	0	0	0.197425	0.274678	0	0	0	0	0	0	0	0	0	24	0	2	1	0
A0ZSE6	113	0.345133	0.0884956	0.212389	0.141593	0.0973451	0.0176991	0.0353982	0.0619469	221.733	32.5549	442.142	0.235398	3.58867	0	0	0	0	0	0	0	0	0	0	0	0	0	0	1	0.184211	0.982456	0	0	0	0	0	0	0	0	0	0	0	0	0	10	0	1	0	0
A1A4F0	135	0.303704	0.133333	0.244444	0.125926	0.0740741	0.0296296	0.0592593	0.0296296	218.789	30.8289	448.422	0.21563	3.63326	0	0	0	0	0	0	0	0	0	0	0	0	0	0	3	0.382353	0.985294	0	0	0	0	0	0	1	0	0	0	0	0	0	27	3	0	0	2
A1A4G5	178	0.146067	0.0730337	0.174157	0.280899	0.202247	0.0561798	0.0393258	0.0280899	229.713	41.3371	435.994	-0.241966	3.75691	29.7753	0	0	0	53	0	0	0	1	0	0	0	5	3	0	0	0	0	0	0.134078	0.391061	0.871508	0	0	0	5	0	0	0	0	20	2	0	0	2
A1A4S6	786	0.26972	0.0839695	0.221374	0.160305	0.137405	0.0636132	0.0496183	0.0139949	217.657	31.7732	460.092	0.0226972	3.47422	19.4656	6.99746	0	0	153	55	0	0	2	2	0	0	8	6	0	0	0	4	4	0.0825921	0.175349	0.170267	0	11	2	9	7	0	4	0	119	1	2	0	1
A1A4V9	331	0.299094	0.0755287	0.193353	0.163142	0.141994	0.0664653	0.0362538	0.0241692	220.006	32.8417	460.598	0.0133233	3.53393	10.8761	6.64653	0	0	36	22	0	0	1	1	0	0	5	3	0	0	0	0	0	0.0963855	0.334337	0.346386	0	2	1	4	1	0	0	0	72	4	2	0	4
A1A4Y4	181	0.342541	0.0773481	0.259669	0.104972	0.116022	0.0331492	0.0552486	0.0110497	210.989	28.6249	463.47	0.16	3.30934	0	0	0	0	0	0	0	0	0	0	0	0	0	0	0	0	0	1	1	0	0	0	0	5	0	0	0	0	0	0	29	0	1	0	1
A1A519	330	0.2	0.0454545	0.278788	0.145455	0.178788	0.0545455	0.0666667	0.030303	215.766	32.5145	455.933	-0.153727	3.30379	48.1818	0	0	0	159	0	0	0	5	0	0	0	8	7	0	0	0	0	0	0.265861	0.326284	0.350453	0	1	12	4	0	0	0	0	41	4	1	0	2
A1A580	65	0.2	0.123077	0.307692	0.0461538	0.0461538	0.0615385	0.138462	0.0769231	198.172	31.2138	472.954	0.288	2.93769	0	0	0	0	0	0	0	0	0	0	0	0	0	0	0	0	0	0	0	0.439394	0.5	0	0	2	0	0	0	0	0	0	5	2	0	0	0
A1A5B4	782	0.349105	0.118926	0.173913	0.139386	0.103581	0.0460358	0.0485934	0.0204604	218.243	35.4026	449.281	0.15734	3.64066	0	0	0	0	0	0	0	0	0	0	0	0	0	0	8	0.222222	0.997446	0	0	0.0625798	0.171137	0	0	16	0	3	0	0	0	0	78	2	2	0	0
A1A5C7	686	0.367347	0.0889213	0.169096	0.0991254	0.0728863	0.0641399	0.106414	0.03207	206.631	35.1338	478.478	0.215466	3.16778	9.32945	0	0	0	64	0	0	0	1	0	0	0	3	3	12	0.36099	0.997089	0	0	0.173217	0.257642	0.57933	0	7	10	5	1	0	0	0	80	0	2	0	4
A1A5D9	508	0.297244	0.019685	0.230315	0.151575	0.187008	0.0472441	0.0649606	0.0019685	219.229	38.2839	488.526	-0.161634	3.31055	12.4016	32.6772	0	0	63	166	0	0	1	5	0	0	8	7	0	0	0	0	0	0.387033	0.97446	0.968566	0	2	0	9	0	0	0	0	57	0	1	0	0
A1E959	279	0.297491	0.0860215	0.308244	0.046595	0.078853	0.11828	0.0645161	0	206.869	30.7018	452.28	0.165161	3.27753	15.0538	0	0	0	42	0	0	0	1	0	0	0	4	3	0	0	0	0	0	0.221429	0.657143	0.807143	1	13	2	1	0	0	0	0	39	2	3	0	3
A1IGU5	675	0.33037	0.0696296	0.225185	0.134815	0.118519	0.0592593	0.0518519	0.0103704	217.913	32.8653	470.474	0.0267704	3.45329	0	7.55556	0	0	0	51	0	0	0	2	0	0	5	2	0	0	0	4	3	0.0162722	0.066568	0	0	14	0	15	0	0	0	0	107	2	0	0	1
A1KXE4	195	0.271795	0.117949	0.266667	0.0512821	0	0.194872	0.0923077	0.00512821	193.959	35.9774	460.8	0.0887692	2.93087	0	0	0	0	0	0	0	0	0	0	0	0	1	0	0	0	0	0	0	0.239796	0.984694	0.979592	0	3	0	5	0	0	0	0	20	2	7	1	0
A1KZ92	1463	0.293233	0.0779221	0.224197	0.138756	0.10663	0.0656186	0.062201	0.0314422	214.726	35.6265	457.063	0.0298428	3.3626	0	2.39234	0	0	0	35	0	0	0	1	0	0	7	1	0	0	0	7	4	0.0307377	0.0717213	0.103142	1	39	2	5	0	1	0	0	201	2	0	0	2
A1L020	520	0.294231	0.0557692	0.180769	0.113462	0.1	0.101923	0.123077	0.0307692	204.007	39.0156	491.398	-0.0999808	2.90944	20.9615	0	0	0	109	0	0	0	2	0	0	0	7	5	0	0	0	2	1	0.274472	0.466411	0.476008	0	24	1	11	8	0	0	0	69	1	3	0	0
A1L0T0	632	0.398734	0.0648734	0.161392	0.118671	0.0886076	0.0585443	0.0917722	0.0174051	209.094	37.1541	489.546	0.012943	3.15384	0	0	0	0	0	0	0	0	0	0	0	0	0	0	1	0.0331754	0.99684	0	0	0.0410742	0.236967	0.469194	0	23	14	5	4	0	0	0	74	1	0	0	6
A1L157	253	0.379447	0.12253	0.177866	0.106719	0.0711462	0.0118577	0.083004	0.0474308	212.413	32.896	468.806	0.180119	3.41004	0	0	0	0	0	0	0	0	0	0	0	0	0	0	4	0.358268	0.992126	0	0	0	0.377953	0.444882	0	6	11	0	0	0	0	0	42	0	0	0	2
A1L162	156	0.224359	0.0384615	0.224359	0.0897436	0.333333	0.0320513	0.0448718	0.0128205	211.904	18.4686	460.212	-0.216667	3.24788	68.5897	0	0	0	107	0	0	0	2	0	0	0	3	3	0	0	0	0	0	0.312102	0.382166	0.605096	0	0	0	0	0	0	0	0	16	1	0	0	0
A1L167	161	0.298137	0.10559	0.198758	0.149068	0.130435	0.0496894	0.0559006	0.0124224	216.529	32.6975	466.13	0.0485714	3.50919	0	0	0	0	0	0	0	0	0	0	0	0	0	0	0	0	0	0	0	0	0	0	0	1	0	0	0	0	1	0	39	0	1	1	0
A1L168	122	0.286885	0.0245902	0.254098	0.172131	0.122951	0.057377	0.0655738	0.0163934	218.804	38.3279	476.672	-0.0393443	3.30967	0	26.2295	0	0	0	32	0	0	0	1	0	0	3	2	0	0	0	0	0	0.105691	0	0.804878	0	0	0	0	0	0	0	0	17	4	0	0	0
A1L170	272	0.268382	0.0367647	0.253676	0.117647	0.132353	0.113971	0.0735294	0.00367647	207.484	35.0904	487.559	-0.0188235	3.0429	78.6765	0	0	0	214	0	0	0	4	0	0	0	8	7	0	0	0	0	0	0.106227	0.362637	0.263736	0	0	3	15	0	0	0	0	41	2	0	0	1
A1L188	74	0.351351	0.0810811	0.121622	0.162162	0.0810811	0.027027	0.108108	0.0675676	207.894	45.9338	512.027	-0.224324	2.9377	0	0	0	0	0	0	0	0	0	0	0	0	0	0	0	0	0	1	1	0.12	0.573333	0.853333	0	2	2	3	0	0	0	0	4	0	0	0	1
A1L190	88	0.340909	0.0568182	0.181818	0.147727	0.238636	0.0227273	0	0.0113636	224.336	21.9864	426.92	0.05	3.77909	0	38.6364	0	0	0	34	0	0	0	1	0	0	0	0	0	0	0	0	0	0.157303	0.382022	0	0	0	40	2	0	0	0	0	13	1	1	0	0
A1L1A6	192	0.364583	0.0520833	0.213542	0.078125	0.078125	0.109375	0.078125	0.0260417	207.432	33.2094	468.698	0.205625	3.14089	16.1458	0	0	0	31	0	0	0	1	0	0	0	0	0	1	0.124352	0.989637	1	1	0.129534	0.129534	0.129534	0	5	0	0	0	0	0	0	31	3	1	0	3
A1L390	1219	0.254307	0.0549631	0.244463	0.148482	0.136177	0.0812141	0.0672683	0.0131255	213.367	36.1824	474.884	-0.0715176	3.24006	49.6308	0	0	0	605	0	0	0	8	0	0	0	26	24	0	0	0	2	2	0.139344	0.285246	0.553279	0	11	1	62	6	2	0	0	198	1	0	0	5
A1L3X0	281	0.323843	0.206406	0.181495	0.128114	0.0569395	0.0355872	0.0462633	0.0213523	216.736	32.0804	434.263	0.352562	3.86897	0	0	0	0	0	0	0	0	0	0	0	0	0	0	7	0.510638	0.992908	0	0	0.035461	0	0	0	1	0	0	0	0	0	0	26	0	3	1	4
A1L3X4	49	0.142857	0.0204082	0.265306	0.122449	0.0408163	0.0204082	0.0816327	0.306122	207.721	19.9796	444.571	-0.124286	2.5751	0	0	0	0	0	0	0	0	0	0	0	0	0	0	0	0	0	0	0	0.64	0.92	0.92	0	1	0	0	0	0	0	0	0	3	2	1	0
A1L429	117	0.136752	0.0512821	0.205128	0.0940171	0.222222	0.153846	0.102564	0.034188	205.921	33.2812	435.06	-0.365983	3.11538	93.1624	0	0	0	109	0	0	0	1	0	0	0	2	2	0	0	0	0	0	0.118644	0.754237	0.822034	0	0	0	3	0	1	0	0	22	1	1	0	1
A1L443	756	0.272487	0.042328	0.198413	0.12963	0.100529	0.153439	0.0886243	0.0145503	207.851	38.2958	476.751	-0.0920635	3.08294	60.1852	0	0	0	455	0	0	0	3	0	0	0	19	12	0	0	0	0	0	0.129458	0.507266	0.811096	0	16	0	2	0	0	0	0	143	1	0	0	1
A1L453	326	0.377301	0.0828221	0.177914	0.0858896	0.0705521	0.0797546	0.0920245	0.0337423	206.272	33.4825	466.745	0.175276	3.20785	0	0	0	0	0	0	0	0	0	0	0	0	0	0	0	0	0	1	1	0.137615	0.198777	0.201835	1	14	0	0	0	0	0	0	65	1	1	0	0
A1L4H1	1573	0.228862	0.041958	0.249205	0.111888	0.104259	0.146853	0.0896376	0.0273363	203.988	39.8834	469.679	-0.0215067	2.95476	59.1863	2.16147	0	0	931	34	0	0	5	1	0	0	31	21	0	0	0	5	1	0.277001	0.693774	0.855146	1	31	3	7	0	0	0	0	233	1	5	0	2
A1L4K1	749	0.268358	0.0881175	0.198932	0.136182	0.178905	0.0520694	0.0520694	0.0253672	215.195	30.7222	450.928	-0.0605741	3.44226	5.07343	8.2777	0	0	38	62	0	0	1	2	0	0	6	3	0	0	0	3	2	0.044	0.156	0.174667	0	12	0	7	0	0	0	0	126	3	1	1	1
A1L4L8	177	0.299435	0.0960452	0.19209	0.129944	0.0847458	0.0451977	0.0734463	0.079096	214.653	37.1192	442.288	0.135763	3.3996	0	0	0	0	0	0	0	0	0	0	0	0	0	0	0	0	0	0	0	0	0	0	0	5	0	0	0	0	0	0	21	1	0	0	1
A1L4Q6	167	0.299401	0.0838323	0.215569	0.107784	0.0958084	0.0958084	0.0718563	0.0299401	206.633	41.1689	480.042	0.0107784	3.13443	0	0	0	0	0	0	0	0	0	0	0	0	0	0	0	0	0	0	0	0.077381	0.267857	0.714286	0	9	0	0	0	0	0	0	32	2	0	1	0
A1X283	911	0.241493	0.0658617	0.193194	0.159166	0.13831	0.117453	0.0757409	0.00878156	215.387	34.6	467.164	-0.128485	3.34884	54.2261	0	0	0	494	0	0	0	3	0	0	0	19	13	0	0	0	5	2	0.0800439	0.1875	0.372807	0	11	3	39	1	1	1	0	165	0	0	0	3
A1XBS5	289	0.307958	0.0622837	0.238754	0.17301	0.16955	0.017301	0.0207612	0.0103806	223.587	31.0017	463.159	-0.0837024	3.54907	7.26644	6.57439	0	0	21	19	0	0	1	1	0	0	2	1	0	0	0	0	0	0.0482759	0.1	0	0	4	2	6	9	0	0	0	43	2	3	0	12
A1YPR0	619	0.282714	0.0807754	0.145396	0.142165	0.159935	0.0936995	0.0694669	0.0258481	211.72	32.9735	456.136	-0.0268174	3.32501	20.1939	0	0	0	125	0	0	0	2	0	0	0	3	2	0	0	0	1	1	0.16129	0.33871	0.443548	0	21	0	9	0	0	0	0	100	2	0	0	4
A1Z1Q3	448	0.25	0.046875	0.216518	0.136161	0.21875	0.0446429	0.0669643	0.0200893	214.4	25.044	466.694	-0.173772	3.2633	46.2054	0	0	0	207	0	0	0	1	0	0	0	4	4	0	0	0	1	1	0.129176	0.247216	0.547884	0	8	0	0	0	0	0	0	59	3	2	0	0
A2A280	76	0.236842	0.0921053	0.25	0.184211	0.118421	0.0657895	0.0394737	0.0131579	220.518	34.2974	436.197	-0.00473684	3.63276	0	0	0	0	0	0	0	0	0	0	0	0	2	0	0	0	0	0	0	0	0	0	0	2	0	0	0	0	0	0	0	1	2	0	0
A2A288	527	0.275142	0.0759013	0.140417	0.16129	0.121442	0.121442	0.0891841	0.0151803	212.336	41.8135	469.808	-0.107495	3.28476	28.8425	0	0	0	152	0	0	0	2	0	0	0	6	3	0	0	0	0	0	0.111742	0.352273	0.460227	0	11	0	4	0	2	0	0	82	1	0	0	2
A2A2A1	95	0.178947	0.0526316	0.210526	0.136842	0.105263	0.157895	0.126316	0.0315789	204.287	35.8063	471.074	-0.106316	2.96484	72.6316	0	0	0	69	0	0	0	1	0	0	0	2	2	0	0	0	0	0	0	0.583333	0	0	1	0	0	0	0	0	0	0	1	2	0	0
A2A2A2	123	0.325203	0.0813008	0.178862	0.121951	0.0569106	0.105691	0.097561	0.0325203	206.223	40.3244	468.715	0.0356911	3.1452	0	0	0	0	0	0	0	0	0	0	0	0	2	0	1	0.145161	0.983871	0	0	0	0.451613	0	0	5	0	0	0	0	0	0	0	0	1	0	0
A2A2V5	107	0.299065	0.102804	0.383178	0.0373832	0.0747664	0.046729	0.046729	0.00934579	202.861	31.7879	494.252	0.413738	3.07991	0	0	0	0	0	0	0	0	0	0	0	0	0	0	1	0.212963	0.981481	0	0	0.268519	0.685185	0.981481	0	4	0	0	0	0	0	0	27	1	1	0	0
A2A2Y4	597	0.284757	0.100503	0.180905	0.157454	0.144054	0.0636516	0.041876	0.0268007	219.311	30.262	453.961	0.0805695	3.58623	10.5528	0	0	0	63	0	0	0	1	0	0	0	4	3	1	0.0334448	0.996656	1	1	0.148829	0.386288	0.429766	0	3	8	11	2	0	0	0	113	2	1	1	1
A2A2Z9	1011	0.309594	0.0514342	0.205737	0.206726	0.169139	0.0158259	0.024728	0.016815	227.363	25.8635	461.099	-0.00814045	3.65325	4.54995	38.6746	0	0	46	391	0	0	3	7	0	0	8	3	0	0	0	0	0	0.0780632	0.353755	0.626482	0	4	0	9	8	0	0	0	129	0	0	0	3
A2A352	105	0.228571	0.0571429	0.12381	0.133333	0.0666667	0.104762	0.247619	0.0380952	201.166	42.5705	508.905	-0.222952	2.74743	1.90476	0	0	0	2	0	0	0	0	0	0	0	2	2	0	0	0	0	0	0.264151	0.669811	0.830189	1	2	0	0	0	0	0	0	5	0	0	0	0
A2A368	324	0.302469	0.0740741	0.216049	0.141975	0.154321	0.0524691	0.0462963	0.0123457	213.839	29.4892	471.614	0.00848765	3.345	11.1111	0	0	0	36	0	0	0	1	0	0	0	3	3	0	0	0	1	1	0.150769	0.283077	0.32	0	4	1	1	0	0	1	0	50	1	0	1	1
A2A3K4	754	0.309019	0.066313	0.209549	0.155172	0.116711	0.0596817	0.0570292	0.0265252	215.813	32.658	460.304	0.0263528	3.37662	12.7321	2.78515	0	0	96	21	0	0	1	1	0	0	9	4	0	0	0	1	1	0	0.0834437	0.0980132	0	11	6	16	7	0	0	0	105	0	0	0	1
A2A3L6	582	0.30756	0.0618557	0.201031	0.161512	0.0927835	0.0635739	0.0910653	0.0206186	211.819	39.8519	482.725	-0.107852	3.18167	28.0069	0	0	0	163	0	0	0	3	0	0	0	10	7	0	0	0	0	0	0.0789022	0.404803	0.686106	0	12	0	5	0	0	0	0	59	6	0	0	0
A2A3N6	862	0.298144	0.0696056	0.226218	0.13109	0.133411	0.0568445	0.0696056	0.0150812	211.751	30.9655	470.636	0.0444896	3.25765	16.1253	0.696056	0	0	139	6	0	0	3	0	0	0	10	6	0	0	0	4	3	0.0892236	0.172654	0.229432	0	11	3	2	9	0	0	0	138	1	0	0	0
A2AJT9	711	0.16315	0.0914205	0.236287	0.244726	0.139241	0.0646976	0.0506329	0.00984529	226.287	36.1717	441.257	-0.159817	3.68624	52.4613	0	0	0	373	0	0	0	4	0	0	0	18	13	0	0	0	0	0	0.0168539	0.105337	0.136236	0	2	0	12	0	0	0	0	81	0	0	1	2
A2CJ06	578	0.295848	0.0536332	0.261246	0.1609	0.105536	0.0605536	0.0380623	0.0242215	219.69	32.8171	462.938	0.0425606	3.43249	23.7024	0	0	0	137	0	0	0	1	0	0	0	9	6	0	0	0	0	0	0.0431779	0.107081	0.38342	0	15	0	8	0	0	0	0	91	1	0	1	0
A2IDD5	438	0.299087	0.0479452	0.230594	0.166667	0.116438	0.0570776	0.0707763	0.0114155	215.263	39.9507	474.468	-0.111598	3.28021	22.3744	23.9726	0	0	98	105	0	0	2	3	0	0	11	6	0	0	0	0	0	0.125285	0.236902	0.594533	0	12	0	0	0	0	0	0	43	6	5	0	2
A2NJV5	120	0.308333	0.0916667	0.266667	0.0833333	0.0666667	0.075	0.0916667	0.0166667	207.276	33.5967	472.9	0.233833	3.22392	0	0	0	0	0	0	0	0	0	0	0	0	0	0	0	0	0	1	1	0	0	0	1	5	0	0	0	0	0	0	23	1	0	0	0
A2PYH4	1435	0.297561	0.0836237	0.245296	0.147735	0.12892	0.0390244	0.0432056	0.0146341	217.479	28.6966	463.366	0.0908223	3.45923	0	0	0	0	0	0	0	0	0	0	0	0	8	1	0	0	0	3	3	0.014624	0.0487465	0	0	23	0	17	0	0	4	0	191	2	0	0	4
A2RRD8	509	0.194499	0.0785855	0.196464	0.263261	0.119843	0.0294695	0.0550098	0.0628684	226.154	33.8923	435.919	-0.0995481	3.60815	0	0	0	0	0	0	0	0	0	0	0	0	3	0	0	0	0	1	1	0.0215686	0	0	0	7	1	17	8	0	0	0	40	2	0	1	5
A2RRH5	827	0.333736	0.076179	0.222491	0.123337	0.0882709	0.0435308	0.070133	0.0423216	210.826	35.0076	476.589	0.0681137	3.19933	0	0	0	0	0	0	0	0	0	0	0	0	1	1	0	0	0	0	0	0.0157005	0.0410628	0	0	26	0	2	0	0	0	0	91	1	2	0	2
A2RRL7	107	0.373832	0.0654206	0.224299	0.0934579	0.0934579	0.0560748	0.0373832	0.0560748	207.473	33.7243	476.841	0.145234	3.11449	0	0	0	0	0	0	0	0	0	0	0	0	0	0	1	0.185185	0.981481	0	0	0.166667	0.333333	0.333333	1	4	0	0	0	0	0	0	20	0	0	0	0
A2RRP1	2371	0.323914	0.0797132	0.207507	0.137073	0.134121	0.0459722	0.0472375	0.0244623	217.077	30.5394	465.442	0.0759806	3.45934	0	1.51835	0	0	0	36	0	0	0	1	0	0	3	0	0	0	0	0	0	0.0522766	0.158094	0.229764	0	47	11	34	42	0	2	0	362	1	0	0	7
A2RTX5	802	0.289277	0.0997506	0.190773	0.154613	0.150873	0.0399002	0.0523691	0.0224439	219.156	31.0424	451.42	0.0350748	3.57766	4.36409	0	0	0	35	0	0	0	1	0	0	0	1	0	0	0	0	0	0	0.0784558	0.13325	0.185554	0	15	15	5	5	1	0	0	102	0	0	0	2
A2RTY3	570	0.32807	0.0631579	0.196491	0.178947	0.115789	0.0666667	0.0263158	0.0245614	223.348	30.0986	455.109	0.0436316	3.60414	0	0	0	0	0	0	0	0	0	0	0	0	1	0	0	0	0	0	0	0.0192644	0	0	0	9	0	3	0	0	0	0	96	0	0	0	2
A2RU14	115	0.521739	0.147826	0.0695652	0.0695652	0.0521739	0.0434783	0.0869565	0.00869565	206.346	36.5617	502.07	0.372783	3.35617	0	0	0	0	0	0	0	0	0	0	0	0	0	0	3	0.568966	0.982759	0	0	0.12931	0.75	0.905172	0	0	0	0	0	0	0	0	11	0	0	1	4
A2RU30	521	0.228407	0.0767754	0.268714	0.140115	0.143954	0.0786948	0.0345489	0.0287908	216.633	33.1939	450.401	-0.0390979	3.42841	17.0825	0	0	0	89	0	0	0	2	0	0	0	5	4	0	0	0	0	0	0.114943	0.250958	0.153257	0	19	11	16	8	0	0	0	74	2	1	0	8
A2RU37	121	0.247934	0.0413223	0.231405	0.198347	0.0991736	0.0330579	0.123967	0.0247934	219.08	41.657	484.975	-0.0903306	3.26149	0	0	0	0	0	0	0	0	0	0	0	0	3	0	0	0	0	0	0	0	0.418033	0.491803	1	3	0	0	0	0	0	0	20	2	0	0	0
A2RU48	225	0.408889	0.0311111	0.204444	0.155556	0.124444	0.0133333	0.0488889	0.0133333	218.898	25.9493	485.213	0.0520889	3.33018	0	14.6667	0	0	0	33	0	0	0	1	0	0	0	0	2	0.185841	0.99115	0	0	0	0.446903	0.70354	0	1	2	1	0	0	0	0	27	2	1	0	0
A2RU49	373	0.327078	0.0991957	0.225201	0.131367	0.107239	0.0402145	0.0563003	0.0134048	213.471	28.6201	465.633	0.145576	3.41834	0	0	0	0	0	0	0	0	0	0	0	0	0	0	0	0	0	0	0	0	0	0	0	5	1	0	1	0	0	0	59	2	1	1	1
A2RU54	273	0.238095	0.0769231	0.21978	0.14652	0.102564	0.106227	0.0915751	0.018315	209.341	37.9432	483.212	-0.046337	3.1567	55.6777	0	0	0	152	0	0	0	1	0	0	0	6	6	0	0	0	0	0	0.0474453	0.463504	0.817518	0	1	0	2	0	0	0	0	38	0	0	1	0
A2RU67	622	0.348875	0.062701	0.22508	0.0900322	0.110932	0.0659164	0.0836013	0.0128617	207.881	32.6892	486.384	0.128183	3.14228	11.8971	0	0	0	74	0	0	0	2	0	0	0	2	2	1	0.0337079	0.99679	0	0	0.0192616	0.105939	0.325843	0	26	39	12	0	0	0	0	92	1	0	1	1
A2RUB1	952	0.22479	0.0861345	0.298319	0.142857	0.116597	0.0577731	0.0514706	0.0220588	214.915	31.0845	453.891	0.0354307	3.37831	5.35714	0	0	0	51	0	0	0	1	0	0	0	17	7	0	0	0	0	0	0.0367261	0.101784	0.112277	0	29	3	8	0	0	0	0	134	0	0	0	4
A2RUB6	948	0.229958	0.0464135	0.290084	0.186709	0.151899	0.0421941	0.035865	0.0168776	223.919	26.9369	455.545	-0.0494304	3.52891	33.6498	3.16456	0	0	319	30	0	0	7	1	0	0	22	13	0	0	0	0	0	0.032666	0.30137	0.283456	0	7	0	23	8	0	4	0	112	2	0	0	5
A2RUC4	315	0.295238	0.12381	0.165079	0.165079	0.139683	0.0539683	0.047619	0.00952381	219.473	31.5981	458.743	-0.000920635	3.64463	0	0	0	0	0	0	0	0	0	0	0	0	0	0	0	0	0	1	1	0.0506329	0	0	0	3	8	5	4	0	0	0	54	1	0	0	1
A2RUG3	117	0.418803	0.119658	0.213675	0.0940171	0.034188	0.042735	0.0512821	0.025641	210.916	29.9248	462.376	0.503419	3.4365	0	0	0	0	0	0	0	0	0	0	0	0	0	0	3	0.525424	0.983051	0	0	0	0	0	0	2	0	3	0	0	0	0	8	2	0	0	0
A2RUH7	354	0.305085	0.0734463	0.211864	0.129944	0.0988701	0.0819209	0.0734463	0.0254237	212.39	34.2316	472.613	-0.00822034	3.24621	13.8418	0	0	0	49	0	0	0	1	0	0	0	3	2	0	0	0	3	2	0	0.126761	0.126761	0	11	2	0	0	0	0	0	62	0	0	0	0
A2RUQ5	167	0.311377	0.0658683	0.209581	0.137725	0.0598802	0.0718563	0.11976	0.0239521	207.177	44.9886	483.156	0.0445509	3.05856	0	0	0	0	0	0	0	0	0	0	0	0	4	1	0	0	0	0	0	0.0714286	0.279762	0.470238	0	5	1	3	0	0	0	0	20	0	2	0	0
A2RUR9	1427	0.258584	0.0455501	0.265592	0.165382	0.1815	0.033637	0.0322355	0.0175193	222.929	25.1582	456.186	-0.0485844	3.53149	24.5971	37.3511	0	0	351	533	0	0	3	9	0	0	25	15	1	0.0140056	0.998599	0	0	0.0651261	0.331933	0.598739	0	15	0	10	1	0	1	0	171	1	0	0	5
A2RUS2	1198	0.324708	0.0801336	0.19783	0.147746	0.118531	0.0567613	0.0459098	0.0283806	216.98	31.4428	454.846	0.0859516	3.47896	0	0	0	0	0	0	0	0	0	0	0	0	0	0	0	0	0	3	3	0.0809008	0.0650542	0.190992	0	21	0	14	31	0	0	0	160	3	3	1	11
A2RUT3	159	0.345912	0.0503145	0.207547	0.157233	0.0440252	0.0691824	0.0943396	0.0314465	215.435	40.0365	461.314	0.177358	3.34264	0	0	0	0	0	0	0	0	0	0	0	0	0	0	1	0.10625	0.9875	0	0	0.13125	0.34375	0	1	3	1	0	0	0	0	0	11	1	2	0	0
A2RUU4	121	0.264463	0.123967	0.214876	0.140496	0.0743802	0.0330579	0.0578512	0.0909091	221.74	29.6446	443.157	0.230579	3.64149	0	0	0	0	0	0	0	0	0	0	0	0	0	0	0	0	0	0	0	0.114754	0.114754	0	1	2	6	1	0	0	0	0	12	0	0	0	1
A2VCK2	349	0.30086	0.0659026	0.189112	0.143266	0.0916905	0.103152	0.0859599	0.0200573	210.006	37.7559	481.928	-0.0773066	3.15562	30.659	0	0	0	107	0	0	0	2	0	0	0	5	3	0	0	0	2	1	0.0742857	0.0828571	0.182857	0	9	7	8	0	0	0	0	55	2	2	0	0
A2VCL2	907	0.31753	0.0639471	0.232635	0.154355	0.127894	0.0407938	0.0418964	0.0209482	220.603	31.956	459.217	0.0192172	3.52	2.53583	15.4355	0	0	23	140	0	0	1	3	0	0	4	2	0	0	0	0	0	0.0528634	0.11674	0.23348	0	16	0	0	0	0	0	0	0	0	0	0	0
A2VDF0	154	0.441558	0.0649351	0.11039	0.11039	0.116883	0.0649351	0.0714286	0.0194805	212.128	32.6831	495.331	0.104545	3.26468	0	0	0	0	0	0	0	0	0	0	0	0	0	0	0	0	0	0	0	0	0	0	0	3	14	0	0	0	0	0	22	0	0	0	2
A2VDJ0	1609	0.267868	0.0882536	0.272219	0.121193	0.102548	0.0652579	0.0540709	0.0285892	212.428	31.0907	459.882	0.110398	3.33097	9.88191	0	0	0	159	0	0	0	2	0	0	0	9	5	2	0.0229814	0.998758	0	0	0.0515528	0.164596	0.149689	1	41	3	31	21	0	2	0	102	2	0	1	2
A2VEC9	5150	0.21767	0.0586408	0.205049	0.0972816	0.0916505	0.108155	0.112233	0.10932	205.27	37.9094	450.775	-0.086934	2.97517	1.96117	0	0	0	101	0	0	0	1	0	0	0	6	3	0	0	0	51	9	0.0698893	0.327315	0.750534	1	194	0	13	0	0	0	0	529	0	0	0	0
A3KFT3	312	0.397436	0.134615	0.192308	0.0929487	0.0544872	0.0352564	0.0544872	0.0384615	211.25	31.909	449.224	0.422853	3.48772	0	0	0	0	0	0	0	0	0	0	0	0	0	0	7	0.495208	0.99361	0	0	0.0415335	0.0926518	0	0	0	0	0	0	0	0	0	27	0	0	0	0
A3KMH1	1905	0.32231	0.071916	0.208924	0.147507	0.12231	0.0540682	0.0635171	0.00944882	217.073	32.5745	464.362	0.0706457	3.43998	4.46194	0	0	0	85	0	0	0	2	0	0	0	9	4	0	0	0	1	1	0.0487933	0.0918153	0.0629591	0	46	12	15	2	0	0	0	303	1	0	0	0
A3KN74	72	0.319444	0.166667	0.236111	0.0972222	0.0555556	0.0138889	0.0833333	0.0277778	212.208	28.425	463.722	0.120833	3.50236	0	0	0	0	0	0	0	0	0	0	0	0	0	0	0	0	0	0	0	0	0	0	1	2	0	0	0	0	0	0	10	0	0	2	0
A3KN83	1393	0.303661	0.0653266	0.237617	0.143575	0.127064	0.0473798	0.0667624	0.0086145	214.579	30.8704	478.426	0.00849964	3.29919	23.3309	0.143575	0	0	325	2	0	0	5	0	0	0	15	12	0	0	0	0	0	0.0982783	0.227403	0.360832	0	28	1	36	8	0	6	0	216	4	2	0	0
A3QJZ6	481	0.334719	0.0873181	0.180873	0.139293	0.112266	0.0582121	0.04158	0.045738	221.39	34.521	452.168	0.169439	3.6184	0	0	0	0	0	0	0	0	0	0	0	0	0	0	0	0	0	0	0	0	0.147303	0	0	6	0	4	0	0	0	0	96	1	0	0	0
A3QJZ7	478	0.355649	0.08159	0.194561	0.135983	0.100418	0.0523013	0.0292887	0.0502092	221.912	30.1278	448.412	0.219477	3.62925	0	0	0	0	0	0	0	0	0	0	0	0	0	0	0	0	0	0	0	0.0584551	0.150313	0.480167	0	3	0	0	0	0	0	0	98	1	0	1	0
A4D0S4	1761	0.250994	0.0613288	0.232822	0.128904	0.116979	0.0579216	0.0777967	0.0732538	212.876	30.5462	455.855	-0.0300341	3.19642	0	19.364	0	0	0	341	0	0	0	3	0	0	3	2	0	0	0	15	4	0.0334847	0.189557	0.376844	1	66	0	18	0	0	0	0	189	1	0	1	2
A4D0T2	115	0.365217	0.0956522	0.2	0.156522	0.0608696	0.0608696	0.0347826	0.026087	216.763	33.153	434.957	0.256957	3.592	0	0	0	0	0	0	0	0	0	0	0	0	0	0	1	0.163793	0.982759	0	0	0	0	0	0	2	0	0	0	0	0	0	19	2	0	1	0
A4D0T7	59	0.559322	0.0169492	0.186441	0.0508475	0.0508475	0.0169492	0.0847458	0.0338983	206.238	30.6542	514.627	0.280508	2.95525	0	0	0	0	0	0	0	0	0	0	0	0	0	0	1	0.35	0.966667	0	0	0.416667	0.8	0.8	1	1	0	0	0	0	0	0	8	0	0	0	0
A4D0V7	1026	0.274854	0.101365	0.233918	0.143275	0.0984405	0.0575049	0.0584795	0.0321637	218.012	31.3011	447.596	0.14155	3.54693	0	0	0	0	0	0	0	0	0	0	0	0	0	0	1	0.0175268	0.998053	0	0	0.0282376	0.103213	0.175268	0	25	0	5	0	0	0	0	169	0	1	0	5
A4D0Y5	90	0.311111	0.0777778	0.233333	0.122222	0.111111	0.0333333	0.0666667	0.0444444	214.843	27.1444	468.344	0.112667	3.33689	0	0	0	0	0	0	0	0	0	0	0	0	0	0	0	0	0	0	0	0	0	0	0	5	0	0	0	0	0	0	12	2	3	0	0
A4D126	451	0.363636	0.0576497	0.184035	0.133038	0.124169	0.0487805	0.059867	0.0288248	214.861	30.9951	472.667	0.00503326	3.31135	0	0	0	0	0	0	0	0	0	0	0	0	1	1	0	0	0	0	0	0	0	0.24115	0	3	0	2	0	0	0	0	64	0	0	0	0
A4D161	298	0.255034	0.0872483	0.201342	0.137584	0.124161	0.0738255	0.0704698	0.0503356	212.953	33.7564	461.248	-0.0519463	3.29111	0	0	0	0	0	0	0	0	0	0	0	0	2	0	0	0	0	0	0	0	0.100334	0.264214	0	7	3	6	2	0	0	0	51	5	1	1	3
A4D174	169	0.307692	0.0887574	0.230769	0.142012	0.0710059	0.0591716	0.0769231	0.0236686	214.751	35.4112	448.55	0.253432	3.45183	0	0	0	0	0	0	0	0	0	0	0	0	0	0	0	0	0	0	0	0	0	0	0	5	0	2	0	0	0	0	27	1	1	0	0
A4D1B5	854	0.330211	0.0960187	0.221311	0.140515	0.107728	0.0339578	0.0444965	0.0257611	217.497	29.5434	453.585	0.199555	3.54529	0	0	0	0	0	0	0	0	0	0	0	0	0	0	0	0	0	0	0	0.0292398	0.0736842	0.0736842	0	13	0	5	0	0	0	0	152	0	0	0	3
A4D1E1	1349	0.22387	0.0622683	0.29874	0.180875	0.108228	0.0578206	0.033358	0.0348406	218.825	29.8786	452.778	0.038258	3.40255	2.37213	0	0	0	32	0	0	0	1	0	0	0	19	10	0	0	0	0	0	0.0562963	0.147407	0.278519	0	45	0	14	0	0	0	0	139	1	0	0	1
A4D1E9	387	0.325581	0.0645995	0.18863	0.165375	0.111111	0.0413437	0.0904393	0.0129199	216.011	30.1713	476.008	0.111189	3.3514	0	5.42636	0	0	0	21	0	0	0	1	0	0	1	0	0	0	0	1	1	0.064433	0.0927835	0	0	5	10	3	2	0	0	0	60	4	3	0	6
A4D1F6	860	0.326744	0.0639535	0.275581	0.133721	0.112791	0.0337209	0.0337209	0.0197674	220.794	24.9744	465.516	0.272035	3.51602	11.8605	0	0	0	102	0	0	0	1	0	0	0	3	3	0	0	0	1	1	0.0778165	0.253194	0.711963	0	6	0	0	0	0	0	0	148	0	0	0	1
A4D1N5	150	0.286667	0.08	0.22	0.146667	0.1	0.08	0.0733333	0.0133333	214.02	39.6353	470.953	0.109667	3.3766	0	0	0	0	0	0	0	0	0	0	0	0	0	0	0	0	0	0	0	0	0.258278	0	0	6	0	0	0	0	0	0	28	0	0	0	0
A4D1P6	747	0.283802	0.0843373	0.235609	0.13253	0.120482	0.0535475	0.0682731	0.021419	213.54	33.0348	468.404	0.0242972	3.33988	19.1432	4.55154	0	0	143	34	0	0	1	1	0	0	5	3	0	0	0	0	0	0.0494652	0.224599	0.259358	0	20	1	19	3	0	0	0	90	2	3	0	1
A4D1S0	409	0.308068	0.0586797	0.166259	0.102689	0.102689	0.134474	0.0977995	0.0293399	202.66	38.9289	489.024	-0.101443	2.95384	51.3447	0	0	0	210	0	0	0	2	0	0	0	7	6	1	0.0560976	0.995122	1	1	0.285366	0.673171	0.795122	0	7	47	17	0	0	0	0	65	0	1	0	0
A4D1S5	217	0.331797	0.0921659	0.211982	0.142857	0.124424	0.0184332	0.0552995	0.0230415	214.93	30.8618	465.507	0.0752995	3.40244	0	0	0	0	0	0	0	0	0	0	0	0	0	0	0	0	0	0	0	0	0	0	0	3	0	1	0	0	0	0	35	2	0	0	1
A4D1T9	235	0.319149	0.102128	0.204255	0.140426	0.0851064	0.0595745	0.0638298	0.0255319	214.894	30.4064	461.072	0.073617	3.44362	0	0	0	0	0	0	0	0	0	0	0	0	0	0	0	0	0	1	1	0	0	0	1	5	12	0	0	0	0	0	38	1	1	1	2
A4D1U4	455	0.312088	0.103297	0.151648	0.120879	0.134066	0.0769231	0.0747253	0.0263736	213.211	33.2026	453.701	0.0311429	3.4484	12.0879	0	0	0	55	0	0	0	1	0	0	0	2	1	0	0	0	3	3	0.14693	0.22807	0.173246	0	9	5	5	2	1	0	0	71	0	0	0	1
A4D1Z8	144	0.291667	0.118056	0.159722	0.138889	0.111111	0.0625	0.0972222	0.0208333	209.772	39.9146	467.049	-0.0366667	3.335	0	0	0	0	0	0	0	0	0	0	0	0	0	0	0	0	0	1	1	0	0	0	0	6	0	0	0	0	0	0	18	2	2	0	0
A4D250	179	0.273743	0.0837989	0.223464	0.0949721	0.122905	0.0949721	0.0837989	0.0223464	206.714	38.5732	474.508	0.0607821	3.18201	0	0	0	0	0	0	0	0	0	0	0	0	2	1	0	0	0	0	0	0	0	0	0	4	0	0	0	0	0	0	23	3	0	0	0
A4D256	447	0.295302	0.123043	0.192394	0.152125	0.114094	0.0402685	0.0559284	0.0268456	218.28	33.3098	445.917	0.0826174	3.5898	0	0	0	0	0	0	0	0	0	0	0	0	0	0	1	0.0535714	0.995536	0	0	0.0245536	0	0	0	7	0	4	0	0	0	0	86	4	0	0	0
A4D263	438	0.232877	0.0936073	0.232877	0.159817	0.114155	0.10274	0.0502283	0.0136986	216.019	33.0831	449.785	0.0323744	3.45977	0	0	0	0	0	0	0	0	0	0	0	0	6	2	0	0	0	0	0	0.0523918	0.0751708	0.138952	0	13	0	0	0	0	0	0	71	1	3	1	0
A4D2B0	266	0.338346	0.037594	0.139098	0.0977444	0.131579	0.0902256	0.157895	0.0075188	199.612	41.0673	507.763	-0.170451	2.79049	24.812	0	0	0	66	0	0	0	2	0	0	0	7	5	0	0	0	0	0	0.17603	0.479401	0.970037	0	9	2	3	0	0	0	0	47	1	0	0	1
A4D2B8	440	0.277273	0.0568182	0.2	0.156818	0.102273	0.0818182	0.0954545	0.0295455	211.215	38.927	479.318	-0.0526136	3.14282	17.7273	0	0	0	78	0	0	0	1	0	0	0	6	4	0	0	0	1	1	0.0725624	0.337868	0.526077	0	11	0	5	1	0	0	0	71	5	2	0	0
A4D2G3	310	0.419355	0.109677	0.183871	0.1	0.0451613	0.0419355	0.0580645	0.0419355	212.717	30.2781	459.739	0.431	3.46181	0	0	0	0	0	0	0	0	0	0	0	0	0	0	7	0.501608	0.993569	0	0	0.141479	0.257235	0.22508	0	0	0	0	0	0	0	0	34	1	0	0	0
A4D2H0	777	0.262548	0.0669241	0.211068	0.148005	0.168597	0.0810811	0.0527671	0.00900901	216.491	30.8815	465.505	-0.0280695	3.4113	29.8584	36.5508	0	0	232	284	0	0	2	4	0	0	9	7	1	0.0231362	0.997429	0	0	0.114396	0.381748	0.785347	0	8	0	9	0	0	0	0	97	0	0	1	0
A4D2P6	1211	0.287366	0.059455	0.208092	0.136251	0.117258	0.104046	0.0718415	0.0156895	211.649	37.9662	477.357	0.00883567	3.22059	25.6813	0	0	0	311	0	0	0	4	0	0	0	23	14	0	0	0	3	2	0.19802	0.40429	0.638614	0	36	0	16	0	0	0	0	250	2	0	0	2
A4FU01	709	0.29055	0.090268	0.212976	0.122708	0.105783	0.0818054	0.0789845	0.0169252	213.401	39.1477	462.882	0.0634415	3.40188	0	0	0	0	0	0	0	0	0	0	0	0	2	1	0	0	0	1	1	0.0380282	0.0873239	0.449296	0	39	0	5	0	0	0	0	108	0	0	0	0
A4FU28	777	0.258687	0.0656371	0.213642	0.150579	0.16731	0.0862291	0.0501931	0.00772201	216.78	31.1313	464.283	-0.019897	3.42024	30.7593	36.4221	0	0	239	283	0	0	1	4	0	0	9	7	1	0.0231362	0.997429	0	0	0.131105	0.363753	0.793059	0	8	0	11	0	0	0	0	111	0	0	1	0
A4FU49	640	0.232813	0.0328125	0.225	0.15625	0.160938	0.139063	0.0484375	0.0046875	214.82	32.8772	473.167	-0.173203	3.24725	77.3438	7.03125	0	0	495	45	0	0	3	1	0	0	17	16	0	0	0	1	1	0.0936037	0.390016	0.76131	0	0	0	10	0	0	0	0	126	2	5	0	1
A4FU69	1503	0.280106	0.0805057	0.232868	0.154358	0.155023	0.0405855	0.0452428	0.0113107	220.018	28.8761	454.733	0.0264737	3.55985	17.5649	2.32868	0	0	264	35	0	0	4	1	0	0	15	10	0	0	0	1	1	0.0106383	0.15891	0.242021	0	9	0	10	0	0	0	0	236	0	0	0	4
A4GXA9	379	0.356201	0.0527704	0.166227	0.124011	0.121372	0.0817942	0.0738786	0.0237467	211.718	42.2047	485.984	-0.117098	3.18807	13.1926	0	0	0	50	0	0	0	1	0	0	0	4	2	0	0	0	0	0	0.152632	0.531579	0.594737	0	12	0	0	0	0	0	0	47	0	2	0	2
A4IF30	521	0.358925	0.105566	0.224568	0.117083	0.0710173	0.0307102	0.0671785	0.024952	212.248	33.4113	471.14	0.254395	3.37566	0	0	0	0	0	0	0	0	0	0	0	0	1	0	10	0.385057	0.996169	1	1	0.0689655	0.0766284	0.300766	0	6	0	0	0	0	0	0	64	0	1	0	3
A4QMS7	147	0.22449	0.0884354	0.176871	0.197279	0.156463	0.0952381	0.0544218	0.00680272	220.729	37.1558	449.463	-0.121565	3.55959	21.0884	0	0	0	31	0	0	0	1	0	0	0	4	1	0	0	0	0	0	0	0	0	0	5	0	3	0	0	0	0	23	2	0	0	1
A4QN01	128	0.257812	0.125	0.210938	0.15625	0.09375	0.046875	0.0703125	0.0390625	224.312	31.8781	420.891	0.163281	3.83789	0	0	0	0	0	0	0	0	0	0	0	0	0	0	0	0	0	0	0	0	0	0	0	3	0	1	0	0	0	0	18	1	0	0	0
A4QPB2	252	0.325397	0.0793651	0.190476	0.150794	0.134921	0.0436508	0.0634921	0.0119048	215.397	33.4873	458.766	0.024127	3.43183	0	0	0	0	0	0	0	0	0	0	0	0	1	0	0	0	0	0	0	0	0	0	0	9	0	0	0	0	0	0	21	0	0	0	0
A4QPH2	592	0.310811	0.106419	0.197635	0.125	0.114865	0.0574324	0.0608108	0.027027	214.405	31.3421	454.069	0.110152	3.45698	0	0	0	0	0	0	0	0	0	0	0	0	0	0	0	0	0	1	1	0	0	0	0	13	0	3	3	0	0	0	96	3	1	1	0
A4UGR9	3374	0.245406	0.0545347	0.27297	0.166271	0.156787	0.0512745	0.0432721	0.00948429	219.22	28.5226	462.08	-0.0567427	3.41774	36.0699	2.22288	0	0	1217	75	0	0	14	3	0	0	69	47	0	0	0	0	0	0.0657778	0.167704	0.166815	0	18	0	41	3	0	4	0	482	4	0	0	1
A5A3E0	1075	0.276279	0.0576744	0.220465	0.16093	0.152558	0.0409302	0.064186	0.0269767	217.207	29.1343	457.35	-0.00461395	3.38782	23.0698	6.04651	0	0	248	65	0	0	1	1	0	0	8	6	0	0	0	0	0	0.00929368	0.0204461	0.27974	0	23	56	31	13	0	2	0	152	1	0	1	1
A5D6W6	292	0.390411	0.133562	0.143836	0.126712	0.0308219	0.0479452	0.0993151	0.0273973	209.7	41.4705	479.616	0.25161	3.38616	0	0	0	0	0	0	0	0	0	0	0	0	0	0	7	0.464164	0.993174	0	0	0.221843	0.47099	0.901024	0	4	0	0	0	0	0	0	20	4	0	0	0
A5D8T8	446	0.280269	0.103139	0.217489	0.132287	0.0784753	0.0426009	0.0829596	0.0627803	211.775	37.7917	454.386	0.0151345	3.30751	0	0	0	0	0	0	0	0	0	0	0	0	0	0	0	0	0	3	3	0.0447427	0.14094	0	1	17	5	1	0	0	0	0	62	0	1	1	2
A5D8V6	355	0.256338	0.0704225	0.191549	0.0929577	0.107042	0.2	0.0788732	0.0028169	206.889	36.0214	463.707	-0.0192394	3.21085	55.2113	22.2535	0	0	196	79	0	0	1	3	0	0	6	4	0	0	0	1	1	0.261236	0.640449	0.792135	0	0	1	4	0	0	0	1	90	0	0	1	1
A5D8V7	595	0.304202	0.0403361	0.213445	0.218487	0.163025	0.0201681	0.0352941	0.00504202	227.274	32.718	469.924	-0.114824	3.60578	13.9496	46.5546	0	0	83	277	0	0	1	5	0	0	7	5	0	0	0	0	0	0.176174	0.471477	0.691275	0	0	19	14	1	0	0	0	58	7	1	0	3
A5D8W1	941	0.347503	0.0690755	0.205101	0.142402	0.126461	0.0361318	0.0499469	0.0233794	218.353	26.5848	470.612	0.108385	3.44372	0	0	0	0	0	0	0	0	0	0	0	0	1	0	0	0	0	0	0	0.0212314	0.10828	0.0477707	0	9	0	4	0	0	0	0	155	1	1	0	6
A5LHX3	300	0.303333	0.0766667	0.186667	0.133333	0.113333	0.0633333	0.09	0.0333333	208.065	40.241	474.167	-0.0831333	3.13493	15.6667	0	0	0	47	0	0	0	1	0	0	0	4	2	0	0	0	0	0	0.129568	0.179402	0.262458	0	10	0	0	0	0	0	0	43	0	0	0	0
A5PKW4	1024	0.267578	0.0605469	0.195312	0.135742	0.12207	0.115234	0.0927734	0.0107422	207.449	39.1458	488.558	-0.0740039	3.07175	55.1758	0	0	0	565	0	0	0	7	0	0	0	12	11	0	0	0	2	2	0.138537	0.563902	0.707317	0	13	0	7	0	1	0	0	153	5	0	0	1
A5PL33	1030	0.234951	0.0300971	0.208738	0.128155	0.0951456	0.162136	0.114563	0.0262136	204.408	41.8918	483.747	-0.0828641	2.91261	85.3398	0.679612	0	0	879	7	0	0	7	0	0	0	21	19	0	0	0	0	0	0.207565	0.590689	0.8613	0	7	20	21	5	4	0	0	173	1	0	0	5
A5PLK6	1076	0.302045	0.0994424	0.230483	0.164498	0.109665	0.0436803	0.0306691	0.0195167	222.252	29.3731	444.507	0.178039	3.69286	0	0	0	0	0	0	0	0	0	0	0	0	0	0	3	0.0445682	0.998143	1	1	0	0.0687094	0	0	14	0	5	0	0	1	0	167	1	0	1	12
A5PLL1	514	0.29572	0.040856	0.262646	0.145914	0.11284	0.0719844	0.0505837	0.0194553	214.237	29.7942	474.035	0.0754864	3.23687	20.2335	0	0	0	104	0	0	0	3	0	0	0	8	8	0	0	0	0	0	0.0485437	0.18835	0.172816	0	15	0	7	0	0	0	0	87	1	1	0	1
A5PLL7	270	0.32963	0.118519	0.148148	0.148148	0.107407	0.0518519	0.0666667	0.0296296	216.442	36.1789	442.178	0.181667	3.62052	0	0	0	0	0	0	0	0	0	0	0	0	0	0	3	0.210332	0.99262	0	0	0.0479705	0	0	0	4	0	1	2	0	0	0	41	0	1	0	3
A5PLN7	773	0.262613	0.0543338	0.247089	0.150065	0.0957309	0.087969	0.0905563	0.0116429	208.905	41.6304	488.263	-0.0464166	3.06801	50.9702	0	0	0	394	0	0	0	7	0	0	0	18	13	0	0	0	0	0	0.197674	0.49354	0.520672	0	11	0	9	0	0	0	0	112	2	2	0	7
A5PLN9	417	0.328537	0.0695444	0.251799	0.11271	0.117506	0.0407674	0.0503597	0.028777	214.413	27.8472	464.139	0.137362	3.34906	0	0	0	0	0	0	0	0	0	0	0	0	0	0	0	0	0	0	0	0.0311005	0.0885167	0.0885167	0	11	8	3	10	0	0	0	50	0	0	0	2
A5X5Y0	456	0.339912	0.109649	0.214912	0.105263	0.0855263	0.0635965	0.0614035	0.0197368	212.571	32.5061	455.496	0.292127	3.47537	11.1842	0	0	0	51	0	0	0	1	0	0	0	0	0	4	0.172867	0.995624	0	0	0	0	0	1	7	0	0	0	0	0	0	44	0	0	0	1
A5YKK6	2376	0.344697	0.0787037	0.221801	0.127946	0.101431	0.0597643	0.0484007	0.0172559	214.768	31.4867	457.707	0.143822	3.41888	3.91414	0	0	0	93	0	0	0	2	0	0	0	8	7	0	0	0	0	0	0.0626841	0.141355	0.187211	0	43	11	29	30	2	3	0	305	2	0	0	9
A5YM69	484	0.237603	0.0392562	0.225207	0.0991736	0.22314	0.072314	0.088843	0.0144628	209.318	31.6721	468.996	-0.190413	3.14905	73.3471	0	0	0	355	0	0	0	4	0	0	0	14	14	0	0	0	0	0	0.142268	0.501031	0.637113	0	0	5	16	0	0	0	0	47	3	1	0	0
A5YM72	827	0.390568	0.0532044	0.124547	0.120919	0.112455	0.0652963	0.101572	0.0314389	208.925	38.1859	493.2	0.00772672	3.11629	0	0	0	0	0	0	0	0	0	0	0	0	0	0	0	0	0	1	1	0.160628	0.315217	0.792271	0	34	0	2	0	0	0	0	93	1	0	0	0
A6BM72	1044	0.181992	0.0727969	0.221264	0.098659	0.085249	0.0795019	0.12069	0.139847	204.118	33.449	439.096	-0.0450479	2.92651	0	0	0	0	0	0	0	0	0	0	0	0	2	2	1	0.0210526	0.998086	15	2	0.0411483	0.202871	0.571292	1	50	0	2	0	0	0	0	37	4	0	1	9
A6H8M9	788	0.341371	0.071066	0.258883	0.0786802	0.0837563	0.0799492	0.0659898	0.0203046	208.414	33.9444	468.147	0.145964	3.21291	0	0	0	0	0	0	0	0	0	0	0	0	1	0	1	0.0278834	0.997465	4	1	0.0367554	0.202788	0.444867	1	33	0	1	0	0	0	0	15	5	2	0	3
A6H8Y1	2624	0.245046	0.0282012	0.261052	0.158537	0.188643	0.0625	0.0449695	0.0110518	218.622	29.2527	471.498	-0.14593	3.31254	73.6662	0.381098	0	0	1933	10	0	0	18	0	0	0	76	64	0	0	0	1	1	0.0624762	0.195048	0.399238	0	6	0	57	7	1	2	0	321	0	3	0	5
A6H8Z2	402	0.208955	0.0671642	0.233831	0.156716	0.159204	0.0845771	0.0422886	0.0472637	214.668	36.0741	439.938	-0.0807711	3.35617	50.995	0	0	0	205	0	0	0	1	0	0	0	5	4	0	0	0	0	0	0.0818859	0.342432	0.46402	0	5	7	1	0	0	0	0	51	0	0	0	2
A6NC05	138	0.224638	0.108696	0.253623	0.152174	0.0797101	0.0869565	0.0434783	0.0507246	216.886	32.4819	443.739	0.133406	3.49435	23.1884	0	0	0	32	0	0	0	1	0	0	0	2	1	0	0	0	0	0	0.0935252	0	0	0	3	0	1	0	0	0	0	23	1	1	1	4
A6NC42	116	0.362069	0.0862069	0.146552	0.163793	0.12069	0.0689655	0.0517241	0	220.943	33.0828	453.991	0.0902586	3.68629	0	0	0	0	0	0	0	0	0	0	0	0	0	0	0	0	0	1	1	0	0	0	0	0	0	0	0	0	0	0	16	0	0	0	0
A6NC51	233	0.433476	0.120172	0.175966	0.0686695	0.0257511	0.0686695	0.0643777	0.0429185	209.005	36.77	465.258	0.328884	3.39468	0	0	0	0	0	0	0	0	0	0	0	0	0	0	6	0.542735	0.991453	0	0	0.205128	0.24359	0.5	0	3	0	0	0	0	0	0	23	5	0	0	4
A6NC57	917	0.281352	0.044711	0.252999	0.184297	0.17121	0.00981461	0.0305344	0.0250818	225.348	26.8477	457.497	-0.0684079	3.55682	10.3599	42.53	0	0	95	390	0	0	1	5	0	0	12	5	0	0	0	0	0	0.0708061	0.244009	0.41939	0	14	0	10	0	1	0	0	88	2	0	0	0
A6NC62	111	0.252252	0.0810811	0.225225	0.153153	0.0900901	0.0810811	0.0900901	0.027027	211.89	42.391	461.721	-0.0291892	3.28901	0	0	0	0	0	0	0	0	0	0	0	0	3	2	0	0	0	0	0	0	0	0	0	7	0	0	0	0	0	0	8	0	0	0	0
A6NC78	632	0.272152	0.0332278	0.227848	0.189873	0.151899	0.0522152	0.0585443	0.0142405	219.992	32.0641	469.195	-0.153418	3.38152	42.0886	20.2532	0	0	266	128	0	0	5	2	0	0	14	10	0	0	0	0	0	0.202212	0.456556	0.78357	0	4	0	1	0	0	0	0	54	0	0	0	0
A6NC86	204	0.269608	0.0539216	0.230392	0.142157	0.0686275	0.0490196	0.0882353	0.0980392	209.936	32.902	454.853	0.13701	3.07843	0	0	0	0	0	0	0	0	0	0	0	0	0	0	0	0	0	1	1	0.0926829	0	0	1	6	0	2	0	1	0	0	21	1	0	0	0
A6NC97	362	0.290055	0.11326	0.207182	0.171271	0.11326	0.0469613	0.0441989	0.0138122	219.314	30.9395	449.149	0.0889779	3.63721	0	0	0	0	0	0	0	0	0	0	0	0	0	0	0	0	0	0	0	0	0	0	0	7	0	0	0	0	0	0	56	3	2	0	0
A6NC98	1476	0.319783	0.0203252	0.183604	0.154472	0.183604	0.0589431	0.0738482	0.00542005	218.467	38.4633	485.961	-0.189831	3.3147	28.7263	41.5989	0	0	424	614	0	0	3	7	0	0	21	14	0	0	0	0	0	0.238998	0.800271	0.962085	1	14	0	17	1	0	0	0	132	2	2	0	1
A6NCC3	632	0.27057	0.0316456	0.22943	0.181962	0.166139	0.0490506	0.0553797	0.0158228	220.136	32.0384	467.468	-0.156155	3.38845	39.8734	23.7342	0	0	252	150	0	0	5	3	0	0	13	9	0	0	0	0	0	0.197472	0.559242	0.843602	0	3	0	9	0	0	0	0	48	0	0	0	4
A6NCE7	125	0.312	0.08	0.208	0.176	0.136	0.048	0.032	0.008	224.442	31.18	447.912	0.04136	3.6968	0	0	0	0	0	0	0	0	0	0	0	0	0	0	0	0	0	0	0	0	0	0	0	3	8	0	5	0	0	0	13	3	1	0	0
A6NCF5	533	0.371482	0.0731707	0.15197	0.121951	0.0919325	0.0769231	0.0863039	0.0262664	209.149	39.9655	483.24	0.0589493	3.20128	0	0	0	0	0	0	0	0	0	0	0	0	0	0	0	0	0	0	0	0.0561798	0.303371	0.477528	0	26	12	6	0	0	0	0	61	0	1	0	2
A6NCF6	341	0.290323	0.0674487	0.231672	0.140762	0.131965	0.058651	0.0527859	0.026393	213.981	30.3079	466.821	0.0123754	3.31402	24.3402	0	0	0	83	0	0	0	1	0	0	0	4	4	0	0	0	1	1	0.0380117	0.0730994	0.269006	0	4	0	0	0	0	0	0	46	3	1	0	0
A6NCI4	1184	0.300676	0.0743243	0.237331	0.155405	0.112331	0.0456081	0.0506757	0.0236486	218.086	31.6381	462.405	0.0865878	3.45659	4.56081	1.77365	0	0	54	21	0	0	1	1	0	0	7	3	0	0	0	2	1	0.00843882	0.0708861	0	0	27	0	8	0	0	1	0	186	4	0	0	4
A6NCI5	91	0.43956	0.10989	0.142857	0.10989	0.0549451	0.0659341	0.021978	0.0549451	215.136	29.5341	432.505	0.524505	3.62846	0	0	0	0	0	0	0	0	0	0	0	0	0	0	1	0.25	0.978261	0	0	0	0	0	0	0	0	0	0	0	0	0	14	1	0	0	0
A6NCI8	922	0.260304	0.0520607	0.340564	0.12039	0.0845987	0.0889371	0.0433839	0.00976139	210.622	31.5581	475.085	0.044295	3.15424	51.0846	0.650759	0	0	471	6	0	0	6	0	0	0	16	14	0	0	0	0	0	0.0671723	0.289274	0.7974	0	22	0	10	0	0	2	0	129	0	0	0	0
A6NCJ1	209	0.22488	0.129187	0.23445	0.133971	0.0861244	0.124402	0.0430622	0.0239234	215.344	41.11	436.565	-0.00832536	3.57641	0	0	0	0	0	0	0	0	0	0	0	0	1	0	0	0	0	0	0	0	0	0	0	13	0	0	0	0	0	0	38	1	2	0	0
A6NCK2	446	0.284753	0.105381	0.201794	0.168161	0.121076	0.044843	0.0358744	0.0381166	221.797	32.2157	437.386	0.106682	3.69433	0	10.9865	0	0	0	49	0	0	0	1	0	0	0	0	0	0	0	1	1	0	0	0	0	9	0	0	0	0	0	0	75	4	2	0	0
A6NCL1	334	0.227545	0.0958084	0.281437	0.140719	0.131737	0.0658683	0.0389222	0.0179641	214.582	31.6054	457.799	-0.0128743	3.4112	0	15.5689	0	0	0	52	0	0	0	1	0	0	6	2	0	0	0	0	0	0.0447761	0.0865672	0.459701	0	6	0	1	0	0	0	0	48	2	1	0	1
A6NCL2	159	0.238994	0.0628931	0.245283	0.132075	0.0566038	0.0880503	0.0628931	0.113208	217.369	32.3572	433.132	0.170126	3.36704	0	0	0	0	0	0	0	0	0	0	0	0	0	0	0	0	0	0	0	0.14375	0.06875	0	1	4	0	0	0	0	0	0	27	0	0	0	3
A6NCL7	494	0.299595	0.048583	0.165992	0.15587	0.135628	0.0951417	0.0789474	0.0202429	213.477	40.1457	478.919	-0.199049	3.20047	41.7004	0	0	0	206	0	0	0	3	0	0	0	8	8	0	0	0	0	0	0.153535	0.541414	0.620202	0	14	0	3	0	0	1	0	84	0	2	1	1
A6NCM1	818	0.309291	0.0635697	0.165037	0.198044	0.154034	0.0476773	0.0513447	0.0110024	225.532	32.2326	462.18	-0.0357946	3.64722	3.78973	5.50122	0	0	31	45	0	0	2	2	0	0	4	3	0	0	0	1	1	0.131868	0.31746	0.313797	0	17	0	0	0	0	0	0	145	0	0	0	2
A6NCN2	255	0.34902	0.0470588	0.196078	0.168627	0.172549	0.00784314	0.027451	0.0313725	222.375	31.1467	471.322	-0.141294	3.45945	0	76.0784	0	0	0	194	0	0	0	2	0	0	0	0	0	0	0	1	1	0	0	0.375	0	2	0	0	0	0	0	0	26	0	0	0	0
A6NCN8	305	0.239344	0.101639	0.216393	0.190164	0.0754098	0.12459	0.0360656	0.0163934	219.618	39.058	435.131	0.0669508	3.6399	0	0	0	0	0	0	0	0	0	0	0	0	2	2	0	0	0	0	0	0.140523	0.160131	0.166667	0	10	0	0	0	0	0	0	40	0	0	0	0
A6NCQ9	220	0.340909	0.05	0.209091	0.127273	0.0772727	0.1	0.0545455	0.0409091	211.994	38.5691	481.318	0.0438182	3.18045	0	0	0	0	0	0	0	0	0	0	0	0	0	0	1	0.104072	0.99095	0	0	0.307692	0.41629	0.665158	0	9	0	1	0	0	0	0	35	0	0	0	0
A6NCV1	312	0.410256	0.11859	0.233974	0.0961538	0.0544872	0.0352564	0.025641	0.025641	214.778	28.7936	458.442	0.466827	3.54026	0	0	0	0	0	0	0	0	0	0	0	0	0	0	7	0.488818	0.99361	0	0	0.153355	0.29393	0.469649	0	0	0	1	0	0	0	0	43	1	1	0	0
A6NCW0	530	0.286792	0.0679245	0.243396	0.158491	0.10566	0.0471698	0.054717	0.0358491	215.919	32.4158	456.73	0.0125849	3.36828	18.1132	0	0	0	96	0	0	0	2	0	0	0	6	3	0	0	0	1	1	0.0414313	0	0.124294	0	13	0	0	0	0	0	0	65	2	2	0	0
A6NCW3	169	0.254438	0.0591716	0.260355	0.130178	0.0946746	0.0828402	0.0887574	0.0295858	209.406	40.7047	474.391	-0.00715976	3.11272	20.7101	0	0	0	35	0	0	0	1	0	0	0	4	3	0	0	0	0	0	0	0	0	0	4	0	0	0	0	0	0	0	1	1	0	0
A6NCW7	530	0.286792	0.0698113	0.243396	0.15283	0.107547	0.0509434	0.0528302	0.0358491	215.606	31.9011	454.194	0.0214906	3.3777	18.1132	0	0	0	96	0	0	0	2	0	0	0	6	4	0	0	0	1	1	0.039548	0.0659134	0.210923	0	13	0	0	0	0	0	0	66	4	2	0	0
A6NCS4	301	0.259136	0.0631229	0.186047	0.156146	0.0797342	0.109635	0.126246	0.0199336	208.485	43.0166	486.934	-0.144817	3.0599	43.5216	0	0	0	131	0	0	0	1	0	0	0	8	7	0	0	0	0	0	0.172185	0.331126	0.695364	0	5	0	0	0	0	0	0	54	0	0	0	0
A6NCS6	295	0.4	0.0440678	0.0949153	0.128814	0.111864	0.0813559	0.111864	0.0271186	204.982	46.1203	515.366	-0.254814	2.87566	0	0	0	0	0	0	0	0	0	0	0	0	2	0	0	0	0	0	0	0.412162	0.760135	0.763514	0	18	0	1	0	0	0	0	28	1	2	0	0
A6ND01	250	0.248	0.132	0.2	0.108	0.1	0.084	0.056	0.072	212.573	33.0236	430.856	0.12128	3.52224	0	0	0	0	0	0	0	0	0	0	0	0	0	0	0	0	0	0	0	0.0398406	0	0	0	3	0	0	0	0	0	0	36	0	0	0	0
A6ND36	823	0.27096	0.0619684	0.194411	0.148238	0.137303	0.104496	0.0765492	0.00607533	211.988	37.0235	465.897	-0.11548	3.26235	50.9113	0	0	0	419	0	0	0	3	0	0	0	11	10	0	0	0	0	0	0.126214	0.322816	0.532767	0	10	3	26	2	2	0	0	129	4	0	0	1
A6ND48	311	0.421222	0.135048	0.205788	0.0932476	0.0450161	0.0321543	0.0353698	0.0321543	213.683	32.4232	458.151	0.396849	3.54884	0	0	0	0	0	0	0	0	0	0	0	0	0	0	7	0.483974	0.99359	0	0	0.0416667	0.185897	0	0	4	0	0	0	0	0	0	31	0	0	0	0
A6ND91	283	0.371025	0.04947	0.169611	0.120141	0.0883392	0.0777385	0.106007	0.0176678	206.167	42.3261	489.583	-0.00335689	3.0317	0	0	0	0	0	0	0	0	0	0	0	0	1	0	0	0	0	0	0	0.0246479	0.323944	0	0	18	1	2	0	0	0	0	33	1	1	0	2
A6NDA9	550	0.341818	0.0745455	0.214545	0.107273	0.101818	0.06	0.0618182	0.0381818	210.529	32.7776	472.718	0.106	3.23824	5.63636	0	0	0	31	0	0	0	1	0	0	0	0	0	1	0.0508167	0.99637	4	4	0.0689655	0.0998185	0	1	15	0	0	0	0	0	0	88	0	0	0	0
A6NDB9	673	0.251114	0.0193165	0.170877	0.121842	0.213967	0.0861813	0.127786	0.0089153	208.241	35.4857	499.508	-0.300817	2.97744	74.8886	7.87519	0	0	504	53	0	0	4	1	0	0	19	13	0	0	0	0	0	0.289318	0.72997	0.980712	0	1	3	28	0	0	0	0	74	1	1	0	1
A6NDD5	238	0.285714	0.0840336	0.222689	0.0840336	0.134454	0.0840336	0.0840336	0.0210084	205.568	34.1979	478.849	0.017479	3.12853	21.0084	0	0	0	50	0	0	0	1	0	0	0	4	3	2	0.1841	0.991632	0	0	0.246862	0.543933	0.610879	0	5	0	0	0	0	0	0	7	2	3	0	1
A6NDE4	496	0.147177	0.0947581	0.229839	0.225806	0.110887	0.0705645	0.110887	0.0100806	215.656	45.9919	462.875	-0.187177	3.32911	69.7581	0	0	0	346	0	0	0	2	0	0	0	13	12	0	0	0	1	1	0.15493	0.517103	0.736419	0	0	0	11	0	0	0	0	45	8	0	1	2
A6NDE8	117	0.136752	0.0512821	0.205128	0.102564	0.213675	0.153846	0.102564	0.034188	206.581	33.2812	436.325	-0.363248	3.12385	93.1624	0	0	0	109	0	0	0	1	0	0	0	2	2	0	0	0	0	0	0.118644	0.754237	0.838983	0	0	0	3	0	1	0	0	21	1	1	0	0
A6NDG6	321	0.373832	0.0623053	0.146417	0.11215	0.11215	0.05919	0.109034	0.0249221	207.276	36.3642	499.685	-0.0366667	3.039	0	0	0	0	0	0	0	0	0	0	0	0	0	0	0	0	0	0	0	0.10559	0.431677	0.531056	0	14	2	5	3	0	0	0	38	0	0	1	1
A6NDH6	313	0.415335	0.127796	0.194888	0.0926518	0.0511182	0.0447284	0.0447284	0.028754	213.927	28.2901	456.112	0.452332	3.55064	0	0	0	0	0	0	0	0	0	0	0	0	0	0	7	0.490446	0.993631	0	0	0	0.213376	0.146497	0	0	0	3	0	0	0	0	46	1	0	1	1
A6NDI0	452	0.274336	0.0973451	0.20354	0.168142	0.119469	0.0442478	0.039823	0.0530973	220.973	31.6104	430.181	0.133518	3.64527	0	0	0	0	0	0	0	0	0	0	0	0	1	0	0	0	0	1	1	0.0220751	0	0	0	6	0	2	0	0	0	0	65	0	0	0	0
A6NDK9	693	0.266955	0.02886	0.248196	0.17316	0.189033	0.049062	0.040404	0.004329	223.535	30.0062	463.527	-0.184675	3.50597	35.7864	29.4372	0	0	248	204	0	0	5	4	0	0	15	10	0	0	0	0	0	0.177233	0.540346	0.778098	0	3	0	3	0	0	0	0	81	3	0	1	0
A6NDL7	271	0.343173	0.110701	0.210332	0.132841	0.125461	0.0332103	0.0295203	0.0147601	217.242	28.4513	454.052	0.206162	3.58889	0	0	0	0	0	0	0	0	0	0	0	0	0	0	0	0	0	0	0	0	0	0	0	2	0	0	0	0	0	0	52	1	0	0	0
A6NDL8	312	0.397436	0.11859	0.224359	0.105769	0.0512821	0.0384615	0.025641	0.0384615	215.606	27.6747	451.167	0.420288	3.54615	0	0	0	0	0	0	0	0	0	0	0	0	0	0	7	0.501597	0.99361	0	0	0	0	0.226837	0	0	0	0	0	0	0	0	30	0	0	0	0
A6NDN3	693	0.266955	0.02886	0.246753	0.176046	0.18759	0.047619	0.040404	0.00577201	223.788	30.045	463.276	-0.183102	3.51039	35.6421	28.86	0	0	247	200	0	0	5	4	0	0	15	13	0	0	0	0	0	0.182997	0.548991	0.778098	0	3	0	4	0	0	0	0	80	3	1	1	0
A6NDN8	102	0.401961	0.0294118	0.156863	0.147059	0.0980392	0.0294118	0.117647	0.0196078	212.583	41.6078	506.471	-0.084902	3.10196	0	0	0	0	0	0	0	0	0	0	0	0	0	0	0	0	0	1	1	0.165049	0.165049	0	0	4	0	0	0	0	0	0	14	0	0	0	0
A6NDP7	307	0.420195	0.13355	0.14658	0.0814332	0.0390879	0.0488599	0.0814332	0.0488599	204.849	38.686	485.577	0.138827	3.18915	0	0	0	0	0	0	0	0	0	0	0	0	0	0	8	0.545455	0.993506	2	1	0.0519481	0.305195	0.753247	0	4	0	0	0	0	0	0	33	0	0	0	0
A6NDR6	274	0.240876	0.0729927	0.240876	0.116788	0.145985	0.0729927	0.0985401	0.0109489	208.602	35.5635	460.044	-0.0256204	3.20496	25.9124	0	0	0	71	0	0	0	1	0	0	0	6	5	0	0	0	0	0	0	0.2	0.2	0	6	1	0	0	0	0	0	28	2	0	0	0
A6NDS4	549	0.262295	0.0819672	0.187614	0.17122	0.114754	0.0837887	0.0746812	0.0236794	217.604	38.1887	453.091	-0.0407832	3.46883	18.3971	0	0	0	101	0	0	0	1	0	0	0	7	5	0	0	0	1	1	0.0527273	0.103636	0.207273	0	14	0	2	0	0	0	0	83	4	1	0	4
A6NDU8	294	0.316327	0.085034	0.197279	0.136054	0.153061	0.0272109	0.047619	0.037415	217.553	26.9102	460.755	0.100646	3.49429	0	0	0	0	0	0	0	0	0	0	0	0	0	0	0	0	0	0	0	0.145763	0.233898	0.423729	0	3	2	1	8	0	0	0	32	1	1	0	1
A6NDV4	472	0.353814	0.108051	0.184322	0.095339	0.0635593	0.0741525	0.0783898	0.0423729	209.43	37.5093	466.25	0.198284	3.31617	8.05085	0	0	0	38	0	0	0	1	0	0	0	1	0	7	0.276956	0.995772	1	1	0.0570825	0.133192	0	0	14	0	1	0	0	0	0	13	1	1	0	0
A6NDX4	124	0.290323	0.137097	0.266129	0.0967742	0.0403226	0.0725806	0.0725806	0.0241935	206.7	38.15	469.548	0.395403	3.32887	0	0	0	0	0	0	0	0	0	0	0	0	0	0	1	0.176	0.984	0	0	0.176	0	0.504	0	3	0	0	0	0	0	0	5	5	3	0	0
A6NDX5	716	0.166201	0.0935754	0.261173	0.251397	0.0740223	0.0349162	0.0600559	0.0586592	224.31	32.8892	433.831	0.00768156	3.59926	0	0	0	0	0	0	0	0	0	0	0	0	2	1	0	0	0	1	1	0.0209205	0.0432357	0	0	27	0	5	0	0	0	0	59	2	1	0	0
A6NDY0	278	0.233813	0.0755396	0.183453	0.122302	0.161871	0.0899281	0.115108	0.0179856	208.391	36.2975	474.335	-0.14446	3.17018	58.9928	0	0	0	164	0	0	0	3	0	0	0	5	5	0	0	0	1	1	0.143369	0.526882	0.810036	0	0	0	0	0	0	0	0	36	3	0	0	1
A6NDY2	464	0.256466	0.0323276	0.219828	0.165948	0.0905172	0.140086	0.0732759	0.0215517	210.291	39.2599	478.276	-0.115647	3.07599	81.4655	0	0	0	378	0	0	0	3	0	0	0	11	10	0	0	0	0	0	0.0989247	0.410753	0.722581	0	1	0	8	0	0	0	0	54	6	0	0	0
A6NDZ8	208	0.317308	0.0288462	0.168269	0.211538	0.0769231	0.105769	0.0673077	0.0240385	220.956	44.8091	468.683	-0.0843269	3.36183	23.0769	0.961538	0	0	48	2	0	0	1	0	0	0	7	6	0	0	0	0	0	0.0574163	0.301435	0.588517	0	1	0	0	0	0	0	0	28	0	0	0	0
A6NE01	2351	0.29647	0.0438111	0.290089	0.128456	0.10889	0.0829434	0.0463632	0.00297746	216.994	29.1385	465.262	0.0616546	3.37402	25.436	3.19013	0	0	598	75	0	0	8	2	0	0	30	20	0	0	0	0	0	0.0837585	0.513605	0.660289	0	25	0	23	1	1	8	0	391	0	0	0	3
A6NE02	478	0.376569	0.0899582	0.179916	0.131799	0.083682	0.0585774	0.0732218	0.00627615	210.349	40.795	482.816	0.019477	3.28048	0	0	0	0	0	0	0	0	0	0	0	0	0	0	0	0	0	2	2	0.0626305	0.346555	0.768267	1	11	0	1	0	0	0	0	62	1	2	2	0
A6NE21	464	0.262931	0.0301724	0.217672	0.172414	0.0883621	0.135776	0.0711207	0.0215517	210.951	39.6597	479.312	-0.127629	3.08332	79.0948	0	0	0	367	0	0	0	3	0	0	0	11	9	0	0	0	0	0	0.0989247	0.348387	0.711828	0	0	0	2	0	0	0	0	54	6	0	0	0
A6NE52	1622	0.339704	0.067201	0.193588	0.131936	0.0986436	0.0875462	0.0573366	0.0240444	214.047	37.83	467.925	0.0638718	3.36046	0.80148	0	0	0	13	0	0	0	1	0	0	0	10	6	0	0	0	0	0	0.101664	0.340111	0.72212	0	56	0	2	0	0	0	0	276	0	1	1	1
A6NE82	208	0.3125	0.0288462	0.173077	0.211538	0.0769231	0.105769	0.0673077	0.0240385	220.672	44.9317	469.639	-0.0900481	3.35029	24.0385	0	0	0	50	0	0	0	1	0	0	0	6	6	0	0	0	0	0	0.0574163	0.301435	0.650718	0	0	0	0	0	0	0	0	29	0	0	0	0
A6NEC2	478	0.330544	0.112971	0.179916	0.119247	0.131799	0.0585774	0.0481172	0.0188285	212.424	32.0201	464.165	0.0388912	3.41609	0	0	0	0	0	0	0	0	0	0	0	0	0	0	0	0	0	0	0	0.085595	0.0876827	0.146138	1	17	0	10	15	0	0	0	89	0	1	0	0
A6NED2	376	0.321809	0.0824468	0.154255	0.109043	0.12234	0.0611702	0.130319	0.018617	204.761	40.3878	496.316	-0.102739	3.04997	0	0	0	0	0	0	0	0	0	0	0	0	3	1	0	0	0	0	0	0.129973	0.488064	0.535809	0	22	19	3	6	2	0	0	38	1	0	0	2
A6NED7	52	0.346154	0.153846	0.173077	0.0769231	0.0961538	0.0576923	0.0576923	0.0384615	212.922	33.7423	422.423	0.214423	3.68808	0	0	0	0	0	0	0	0	0	0	0	0	0	0	1	0.377358	0.962264	1	1	0	0	0	0	0	0	0	0	0	0	0	12	0	0	0	0
A6NEE1	506	0.278656	0.0592885	0.231225	0.181818	0.173913	0.0316206	0.0335968	0.00988142	225.069	30.3379	459.486	-0.043419	3.63733	0.592885	41.6996	0	0	3	211	0	0	0	2	0	0	8	5	0	0	0	1	1	0.22288	0.465483	0.593688	0	4	0	3	0	0	1	0	65	1	0	0	0
A6NEF3	574	0.252613	0.0261324	0.19338	0.175958	0.247387	0.0383275	0.0522648	0.0139373	227.866	33.666	463.005	-0.250958	3.62439	22.6481	25.9582	0	0	130	149	0	0	4	3	0	0	8	5	0	0	0	0	0	0.547826	0.706087	0.968696	0	0	0	2	2	0	0	0	53	1	0	0	2
A6NEH6	219	0.287671	0.0958904	0.16895	0.141553	0.146119	0.0684932	0.0593607	0.0319635	216.782	31.0511	444.712	0.0251598	3.53393	47.9452	15.5251	0	0	105	34	0	0	2	1	0	0	3	3	2	0.168182	0.990909	0	0	0.0454545	0.131818	0.745455	0	2	0	0	0	0	0	0	26	1	0	0	0
A6NEH8	195	0.266667	0.0615385	0.158974	0.184615	0.0512821	0.153846	0.107692	0.0153846	210.106	48.1159	481.831	-0.0715385	3.14867	24.1026	0	0	0	47	0	0	0	1	0	0	0	6	4	0	0	0	0	0	0	0.47449	0.954082	0	2	0	0	0	0	0	0	29	2	0	0	0
A6NEK1	342	0.289474	0.0877193	0.269006	0.122807	0.105263	0.0555556	0.0438596	0.0263158	214.571	31.4605	459.374	0.095614	3.3907	0	0	0	0	0	0	0	0	0	0	0	0	0	0	0	0	0	0	0	0.0437318	0.0787172	0.142857	0	13	0	2	0	0	0	0	66	4	1	0	0
A6NEL2	793	0.283733	0.0504414	0.200504	0.165195	0.107188	0.0983607	0.0819672	0.0126103	211.785	41.3788	488.999	-0.137566	3.14747	47.2888	0	0	0	375	0	0	0	4	0	0	0	18	13	0	0	0	0	0	0.22796	0.45466	0.663728	0	15	0	16	0	1	0	0	104	6	2	1	0
A6NEL3	165	0.284848	0.0787879	0.242424	0.133333	0.10303	0.0545455	0.0606061	0.0424242	214.668	36.7479	468.958	0.109939	3.36085	0	0	0	0	0	0	0	0	0	0	0	0	0	0	0	0	0	0	0	0.0722892	0.463855	0.873494	0	9	0	0	0	0	0	0	27	0	1	0	0
A6NEM1	432	0.266204	0.0347222	0.219907	0.157407	0.189815	0.0509259	0.0694444	0.0115741	220.779	33.8433	472.438	-0.161597	3.42301	28.7037	17.8241	0	0	124	77	0	0	3	2	0	0	8	5	0	0	0	0	0	0.371824	0.692841	0.614319	0	0	0	3	0	0	0	0	50	1	0	0	0
A6NEN9	183	0.289617	0.0819672	0.20765	0.229508	0.0710383	0.0655738	0.0327869	0.0218579	228.471	31.0372	460.115	0.0263388	3.70656	26.776	0	0	0	49	0	0	0	1	0	0	0	3	2	0	0	0	0	0	0	0.228261	0.358696	0	4	0	0	0	0	1	0	29	2	4	0	1
A6NEQ0	496	0.149194	0.0927419	0.227823	0.225806	0.110887	0.0705645	0.110887	0.0120968	215.597	46.0014	462.958	-0.190645	3.31976	68.1452	0	0	0	338	0	0	0	2	0	0	0	13	10	0	0	0	1	1	0.15493	0.515091	0.736419	0	0	0	7	0	0	0	0	44	7	0	0	0
A6NEQ2	426	0.314554	0.0633803	0.13615	0.0985915	0.103286	0.129108	0.140845	0.0140845	195.373	40.4643	517.124	-0.103005	2.68549	32.3944	0	0	0	138	0	0	0	3	0	0	0	13	8	0	0	0	0	0	0.346604	0.641686	0.920375	0	10	0	4	0	0	0	0	58	2	0	1	0
A6NER0	549	0.262295	0.0819672	0.183971	0.17122	0.114754	0.0856102	0.0765027	0.0236794	217.308	38.0933	454.463	-0.0493078	3.45678	18.3971	0	0	0	101	0	0	0	1	0	0	0	7	5	0	0	0	1	1	0.0527273	0.103636	0.178182	0	15	0	3	0	0	0	0	83	4	1	0	1
A6NER3	117	0.136752	0.0512821	0.205128	0.0940171	0.222222	0.162393	0.102564	0.025641	205.834	33.0085	439.487	-0.373077	3.11026	98.2906	0	0	0	115	0	0	0	1	0	0	0	2	2	0	0	0	0	0	0.118644	0.779661	0.898305	0	0	0	3	0	0	0	0	22	1	1	0	0
A6NES4	1674	0.376344	0.0686977	0.208483	0.134409	0.117085	0.0364397	0.037037	0.0215054	217.59	30.2286	462.016	0.162569	3.48099	0	0	0	0	0	0	0	0	0	0	0	0	2	0	0	0	0	0	0	0.0304478	0.0770149	0.146866	0	20	0	24	0	0	0	0	265	2	0	0	3
A6NET4	321	0.392523	0.133956	0.183801	0.105919	0.0654206	0.0373832	0.0373832	0.0436137	215.233	27.4888	443.065	0.4219	3.60084	0	0	0	0	0	0	0	0	0	0	0	0	0	0	7	0.478261	0.993789	0	0	0.0310559	0	0	0	0	0	0	0	0	0	0	35	1	0	0	0
A6NEV1	266	0.315789	0.0526316	0.146617	0.0902256	0.142857	0.161654	0.075188	0.0150376	203.57	38.7714	482.421	-0.0850752	3.01842	27.0677	0	0	0	72	0	0	0	2	0	0	0	5	4	0	0	0	0	0	0.423221	0.827715	0.951311	0	4	0	1	0	0	0	0	57	0	0	0	0
A6NEW6	464	0.262931	0.0280172	0.217672	0.174569	0.0905172	0.135776	0.0689655	0.0215517	211.607	39.8644	479.045	-0.135797	3.09218	81.8966	0	0	0	380	0	0	0	3	0	0	0	11	10	0	0	0	0	0	0.0989247	0.350538	0.72043	0	0	0	1	0	0	0	0	52	6	0	0	0
A6NEY3	463	0.233261	0.0259179	0.192225	0.185745	0.261339	0.0410367	0.0388769	0.0215983	232.316	33.1771	452.27	-0.258898	3.76445	13.3909	14.0389	0	0	62	65	0	0	2	2	0	0	5	3	0	0	0	0	0	0.553879	0.609914	0.855603	0	0	0	0	1	0	0	0	45	0	0	0	0
A6NEY8	169	0.360947	0.0769231	0.147929	0.147929	0.130178	0.035503	0.0887574	0.0118343	210.829	29.8036	472.639	0.116746	3.30065	0	0	0	0	0	0	0	0	0	0	0	0	0	0	0	0	0	0	0	0.0705882	0	0	0	1	0	0	0	0	0	0	27	0	0	0	0
A6NF01	834	0.247002	0.0683453	0.356115	0.0647482	0.0359712	0.141487	0.0839329	0.00239808	193.673	39.2185	509.018	0.105911	2.6429	46.8825	0	0	0	391	0	0	0	3	0	0	0	17	11	0	0	0	0	0	0.348503	0.91497	0.961677	0	13	0	2	1	0	0	0	141	3	1	0	0
A6NF29	218	0.348624	0.087156	0.197248	0.16055	0.087156	0.0275229	0.0688073	0.0229358	219.282	30.9216	454.041	0.151147	3.53115	0	0	0	0	0	0	0	0	0	0	0	0	0	0	0	0	0	1	1	0	0	0	0	2	0	0	0	0	0	0	0	0	0	0	0
A6NF34	631	0.267829	0.0729002	0.213946	0.142631	0.0808241	0.10935	0.0538827	0.0586371	215.515	35.1818	443.173	0.0803328	3.38257	5.54675	0	0	0	35	0	0	0	1	0	0	0	0	0	1	0.028481	0.996835	1	1	0.208861	0.289557	0.492089	1	19	0	0	0	0	0	0	79	4	1	0	4
A6NF36	153	0.320261	0.0457516	0.189542	0.169935	0.163399	0.0392157	0.0522876	0.0196078	223.122	32.2458	468.928	-0.0684314	3.51562	0	27.451	0	0	0	42	0	0	0	2	0	0	1	1	0	0	0	0	0	0.214286	0.344156	0.402597	0	3	0	0	0	0	0	0	12	0	0	0	0
A6NF83	97	0.257732	0.0721649	0.14433	0.237113	0.103093	0.103093	0.0618557	0.0206186	228.135	44.1278	453.629	-0.153299	3.68546	53.6082	0	0	0	52	0	0	0	1	0	0	0	2	0	0	0	0	0	0	0.357143	0.387755	0.571429	0	1	0	0	0	0	0	0	17	0	3	0	0
A6NF89	314	0.394904	0.127389	0.226115	0.0955414	0.0541401	0.044586	0.022293	0.0350318	217.39	27.9854	449.067	0.446943	3.64092	0	0	0	0	0	0	0	0	0	0	0	0	0	0	7	0.536508	0.993651	0	0	0.0698413	0.269841	0.488889	0	0	0	1	0	0	0	0	44	1	0	0	0
A6NFA0	338	0.275148	0.0532544	0.292899	0.136095	0.109467	0.0532544	0.0473373	0.0325444	215.839	31.9204	466.488	0.0226036	3.30734	36.3905	0	0	0	123	0	0	0	2	0	0	0	5	3	1	0.0619469	0.9941	0	0	0	0.0825959	0.286136	0	7	0	0	0	0	0	0	40	1	5	0	2
A6NFA1	517	0.307544	0.0793037	0.234043	0.117988	0.098646	0.10058	0.0502901	0.0116054	211.415	35.5135	459.346	0.0785493	3.32865	27.6596	4.0619	0	0	143	21	0	0	2	1	0	0	5	5	1	0.03861	0.996139	0	0	0.169884	0.349421	0.279923	1	11	0	1	0	0	0	0	4	1	1	0	0
A6NFC5	223	0.439462	0.0896861	0.197309	0.0538117	0.0493274	0.0358744	0.103139	0.0313901	201.036	36.7502	502.368	0.280493	3.01453	0	0	0	0	0	0	0	0	0	0	0	0	0	0	3	0.3125	0.991071	0	0	0.299107	0.598214	0.633929	1	1	0	0	0	0	0	0	36	3	1	0	1
A6NFC9	320	0.353125	0.071875	0.16875	0.13125	0.0875	0.059375	0.08125	0.046875	211.87	36.3469	450.678	0.217219	3.34006	19.0625	0	0	0	61	0	0	0	1	0	0	0	3	3	4	0.267913	0.993769	0	0	0.05919	0.140187	0.364486	0	2	0	1	0	0	0	0	33	2	2	0	0
A6NFD8	242	0.305785	0.0826446	0.161157	0.173554	0.0909091	0.115702	0.0619835	0.00826446	213.197	37.1252	465.558	0.0386777	3.36715	0	0	0	0	0	0	0	0	0	0	0	0	2	1	0	0	0	2	2	0.135802	0.27572	0.502058	0	4	0	0	0	0	0	0	53	1	2	0	1
A6NFE2	343	0.3207	0.0612245	0.221574	0.134111	0.180758	0.0262391	0.0379009	0.0174927	220.421	23.7362	459.469	0.118017	3.53965	0	20.4082	0	0	0	70	0	0	0	2	0	0	4	1	1	0.0639535	0.994186	0	0	0.0465116	0.156977	0	0	4	0	3	0	0	0	0	46	0	2	0	1
A6NFE3	127	0.322835	0.0944882	0.181102	0.15748	0.173228	0.023622	0.0393701	0.00787402	220.543	27.3142	462.465	0.0905512	3.61354	0	0	0	0	0	0	0	0	0	0	0	0	0	0	0	0	0	1	1	0	0	0	0	0	0	0	0	0	0	0	24	0	1	0	3
A6NFF2	107	0.345794	0.0841121	0.158879	0.149533	0.140187	0.046729	0.0560748	0.0186916	216.472	30.6271	479.542	0.0246729	3.42271	0	0	0	0	0	0	0	0	0	0	0	0	0	0	0	0	0	0	0	0	0	0	0	0	0	0	0	0	0	0	16	0	1	0	0
A6NFH5	140	0.257143	0.05	0.292857	0.157143	0.142857	0.0142857	0.0714286	0.0142857	218.112	27.1993	480.436	0.0161429	3.30493	0	0	0	0	0	0	0	0	0	0	0	0	1	0	0	0	0	0	0	0	0.432624	0	0	0	0	6	0	0	0	0	20	4	5	0	1
A6NFI3	1004	0.234064	0.0687251	0.128486	0.155378	0.171315	0.0856574	0.120518	0.0358566	207.576	40.9894	474.752	-0.25007	3.07819	31.1753	0	0	0	313	0	0	0	6	0	0	0	18	16	0	0	0	1	1	0.280597	0.393035	0.827861	0	26	8	19	0	0	0	0	77	0	0	0	1
A6NFK2	248	0.21371	0.0766129	0.221774	0.165323	0.153226	0.0645161	0.0685484	0.0362903	218.684	30.8972	451.456	-0.0764113	3.43944	9.27419	2.41935	0	0	23	6	0	0	1	0	0	0	3	2	0	0	0	0	0	0.0562249	0	0	0	5	0	1	0	0	0	0	35	4	0	1	1
A6NFN3	312	0.253205	0.115385	0.221154	0.105769	0.0833333	0.128205	0.0929487	0	204.235	36.8939	463.199	-0.0599038	3.16231	34.6154	0	0	0	108	0	0	0	1	0	0	0	4	4	0	0	0	1	1	0.169329	0.466454	0.667732	0	10	2	2	0	0	0	0	51	1	1	0	5
A6NFN9	424	0.332547	0.0943396	0.183962	0.160377	0.0966981	0.0471698	0.0542453	0.0306604	216.498	30.7203	467.866	0.0833962	3.4487	0	0	0	0	0	0	0	0	0	0	0	0	2	0	0	0	0	0	0	0	0	0	0	3	0	8	0	0	0	0	88	2	0	0	1
A6NFQ2	919	0.338411	0.0826986	0.183896	0.119695	0.0924918	0.0696409	0.085963	0.0272035	210.31	34.63	470.958	0.0710664	3.27436	0	0	0	0	0	0	0	0	0	0	0	0	1	0	0	0	0	1	1	0.0130435	0.026087	0	0	37	19	1	0	0	0	0	120	0	0	0	0
A6NFQ7	191	0.256545	0.0680628	0.219895	0.193717	0.078534	0.0994764	0.052356	0.0314136	218.73	33.6042	442.026	0.0563874	3.46665	0	0	0	0	0	0	0	0	0	0	0	0	2	2	0	0	0	0	0	0	0	0	0	3	0	0	0	0	0	0	28	4	0	0	0
A6NFR6	353	0.254958	0.0623229	0.229462	0.161473	0.0849858	0.13881	0.0424929	0.0254958	214.966	38.753	457.065	0.0753541	3.35643	42.4929	0	0	0	150	0	0	0	1	0	0	0	2	2	1	0.059322	0.99435	0	0	0.206215	0.618644	0.624294	0	7	0	7	0	0	0	0	56	0	0	0	1
A6NFT4	308	0.353896	0.0519481	0.175325	0.178571	0.162338	0.038961	0.0324675	0.00649351	226.399	38.4029	468.776	-0.131786	3.65146	0	44.8052	0	0	0	138	0	0	0	5	0	0	1	1	0	0	0	0	0	0.132686	0.466019	0.841424	0	2	0	0	0	0	0	0	31	0	0	0	1
A6NFU0	413	0.292978	0.125908	0.174334	0.1477	0.0968523	0.0532688	0.0653753	0.0435835	216.467	37.1182	443.864	0.0482809	3.55707	0	0	0	0	0	0	0	0	0	0	0	0	0	0	1	0.0628019	0.995169	1	1	0.031401	0	0	1	10	0	0	0	0	0	0	4	2	0	0	0
A6NFU8	196	0.352041	0.0561224	0.142857	0.158163	0.117347	0.0561224	0.0918367	0.0255102	215.282	35.0622	476.286	-0.0543878	3.30464	0	0	0	0	0	0	0	0	0	0	0	0	0	0	0	0	0	0	0	0	0	0	0	3	0	0	0	0	0	0	24	1	0	0	1
A6NFW1	64	0.375	0.078125	0.1875	0.125	0.125	0.078125	0.015625	0.015625	212.827	31.0297	447.859	0.0798438	3.44219	0	0	0	0	0	0	0	0	0	0	0	0	0	0	0	0	0	0	0	0	0	0	0	1	0	0	0	0	0	0	57	2	0	0	0
A6NFX1	504	0.388889	0.10119	0.190476	0.0912698	0.0456349	0.0793651	0.0753968	0.0277778	205.26	37.5185	486.268	0.173214	3.14335	6.54762	0	0	0	33	0	0	0	1	0	0	0	0	0	12	0.50495	0.99604	0	0	0.138614	0.287129	0.467327	0	9	0	3	0	0	0	0	63	1	0	0	2
A6NFY4	417	0.352518	0.153477	0.17506	0.119904	0.0863309	0.0455635	0.0407674	0.0263789	217.545	33.1072	448.276	0.228058	3.72962	0	0	0	0	0	0	0	0	0	0	0	0	0	0	6	0.282297	0.995215	0	0	0.148325	0.167464	0.361244	1	5	1	3	1	0	0	0	56	1	0	0	3
A6NFY7	115	0.252174	0.0434783	0.156522	0.226087	0.104348	0.0869565	0.121739	0.00869565	219.62	51.6643	473.765	-0.219391	3.31678	46.087	0	0	0	53	0	0	0	1	0	0	0	3	1	0	0	0	0	0	0.12069	0.206897	0	0	1	0	0	0	0	0	0	16	1	0	0	0
A6NFZ4	105	0.390476	0.047619	0.180952	0.12381	0.0857143	0.047619	0.0380952	0.0857143	209.63	26.9076	467.381	0.0774286	3.08857	0	0	0	0	0	0	0	0	0	0	0	0	0	0	1	0.216981	0.981132	0	0	0.301887	0.330189	0.490566	0	3	0	0	0	0	0	0	20	0	0	0	0
A6NG13	374	0.323529	0.114973	0.227273	0.171123	0.0962567	0.0187166	0.0347594	0.013369	223.418	28.6249	453.484	0.192326	3.72535	0	0	0	0	0	0	0	0	0	0	0	0	0	0	1	0.0506667	0.994667	0	0	0	0	0	0	2	0	0	0	0	0	0	5	3	0	1	5
A6NGA9	273	0.322344	0.113553	0.241758	0.120879	0.0695971	0.0549451	0.043956	0.032967	216.294	33.2322	446.498	0.311905	3.587	0	0	0	0	0	0	0	0	0	0	0	0	0	0	4	0.306569	0.992701	0	0	0	0	0	0	4	0	1	0	0	0	0	33	4	0	0	1
A6NGB0	347	0.340058	0.0403458	0.221902	0.146974	0.126801	0.0576369	0.054755	0.0115274	221.32	38.7585	478.167	-0.00654179	3.45697	10.3746	19.3084	0	0	36	67	0	0	1	2	0	0	5	2	1	0.0747126	0.994253	0	0	0.25	0.833333	0.856322	0	3	0	0	0	0	0	0	49	4	3	0	6
A6NGB7	291	0.426117	0.0515464	0.134021	0.116838	0.0756014	0.0584192	0.116838	0.0206186	204.652	42.3241	509.46	0.114055	2.96265	27.4914	0	0	0	80	0	0	0	2	0	0	0	1	1	4	0.315068	0.993151	0	0	0.321918	0.616438	0.715753	0	7	0	0	0	0	0	0	28	2	0	0	0
A6NGB9	483	0.231884	0.0289855	0.213251	0.10559	0.0517598	0.281573	0.0786749	0.00828157	201.021	39.4145	478.099	-0.026294	2.86424	95.8592	0	0	0	463	0	0	0	2	0	0	0	12	10	0	0	0	1	1	0.47314	0.667355	0.85124	0	1	3	11	0	1	0	1	163	5	2	0	1
A6NGC4	264	0.405303	0.0757576	0.204545	0.121212	0.0416667	0.0530303	0.0833333	0.0151515	210.184	40.0519	484.985	0.297348	3.27652	11.7424	0	0	0	31	0	0	0	1	0	0	0	1	0	7	0.509434	0.992453	1	1	0.203774	0.335849	0.698113	0	4	0	1	0	0	0	0	34	2	1	0	0
A6NGD5	496	0.227823	0.046371	0.233871	0.179435	0.131048	0.0846774	0.0584677	0.0383065	217.817	34.276	452.518	-0.0988911	3.35113	40.7258	0	0	0	202	0	0	0	2	0	0	0	8	6	0	0	0	1	1	0	0.0663984	0.0945674	0	10	0	0	0	0	0	0	53	3	3	0	0
A6NGE4	600	0.245	0.0833333	0.235	0.128333	0.171667	0.04	0.075	0.0216667	212.753	33.397	460.017	-0.0787667	3.31798	23.8333	0	0	0	143	0	0	0	3	0	0	0	6	4	0	0	0	0	0	0.103161	0.103161	0.24792	0	17	1	0	0	0	0	0	68	0	0	0	0
A6NGE7	173	0.358382	0.0693642	0.156069	0.144509	0.144509	0.0404624	0.0693642	0.017341	214.995	39.7179	489.491	-0.0382659	3.29884	0	0	0	0	0	0	0	0	0	0	0	0	0	0	0	0	0	0	0	0.0574713	0.224138	0.804598	0	5	0	1	0	0	0	0	19	1	0	0	0
A6NGF6	61	0.344262	0.0655738	0.196721	0.229508	0.0983607	0.0163934	0	0.0491803	225.373	28.4377	484.689	0.0747541	3.51115	0	0	0	0	0	0	0	0	0	0	0	0	0	0	0	0	0	0	0	0	0	0	0	0	0	0	0	0	0	0	6	1	1	0	0
A6NGG3	77	0.246753	0.038961	0.25974	0.181818	0.0649351	0.0649351	0.0779221	0.0649351	218.864	35.7091	454.792	-0.0898701	3.25416	0	0	0	0	0	0	0	0	0	0	0	0	1	0	0	0	0	0	0	0	0	0	0	4	0	0	0	0	0	0	7	1	1	0	0
A6NGG8	1288	0.22205	0.0403727	0.283385	0.140528	0.109472	0.118789	0.0621118	0.0232919	211.072	35.9804	471.901	-0.0516925	3.13102	63.354	0	0	0	816	0	0	0	9	0	0	0	33	27	0	0	0	0	0	0.0845617	0.389449	0.564779	0	6	0	20	0	0	0	0	200	2	0	0	0
A6NGH7	325	0.246154	0.0769231	0.283077	0.172308	0.187692	0.0153846	0.0123077	0.00615385	224.893	24.96	460.52	0.0176923	3.65462	24.9231	31.3846	0	0	81	102	0	0	2	2	0	0	6	4	0	0	0	0	0	0.110429	0.395706	0.865031	0	0	0	6	0	0	0	0	35	3	2	0	0
A6NGH8	418	0.363636	0.0526316	0.248804	0.131579	0.069378	0.0454545	0.0574163	0.0311005	215.154	31.5017	467.761	0.215072	3.30074	0	0	0	0	0	0	0	0	0	0	0	0	0	0	0	0	0	0	0	0.0286396	0	0	0	14	0	0	0	0	0	0	58	1	0	1	0
A6NGJ6	449	0.267261	0.0935412	0.242762	0.120267	0.140312	0.0534521	0.0356347	0.0467706	216.653	31.1361	437.2	0.0532071	3.50105	0	8.90869	0	0	0	40	0	0	0	1	0	0	0	0	0	0	0	1	1	0.0311111	0.131111	0.293333	0	24	0	1	0	0	0	0	64	4	0	0	0
A6NGJ7	248	0.326613	0.108871	0.177419	0.108871	0.116935	0.0483871	0.0887097	0.0241935	209.805	30.4621	468.327	0.0967339	3.31871	0	0	0	0	0	0	0	0	0	0	0	0	0	0	0	0	0	1	1	0	0	0.184739	0	2	0	0	0	0	0	0	73	1	2	1	0
A6NGK3	116	0.172414	0.0344828	0.189655	0.103448	0.224138	0.137931	0.112069	0.0258621	206.685	33.6845	455.345	-0.349397	3.05534	100	0	0	0	116	0	0	0	1	0	0	0	2	2	0	0	0	0	0	0.119658	0.435897	0.803419	0	0	0	0	0	0	0	0	20	1	0	0	0
A6NGN4	478	0.349372	0.0774059	0.192469	0.150628	0.0983264	0.0523013	0.0313808	0.0481172	223.334	31.0818	449.013	0.222782	3.65368	0	0	0	0	0	0	0	0	0	0	0	0	0	0	0	0	0	0	0	0.0584551	0.150313	0.419624	0	5	0	0	0	0	0	0	104	1	0	1	1
A6NGN9	336	0.345238	0.0714286	0.229167	0.107143	0.0922619	0.0625	0.0714286	0.0208333	211.295	38.2241	477.932	0.0834524	3.23574	0	0	0	0	0	0	0	0	0	0	0	0	0	0	0	0	0	3	1	0.160237	0.222552	0.231454	1	13	0	2	0	0	0	0	51	4	0	0	0
A6NGQ2	149	0.342282	0.0738255	0.147651	0.167785	0.134228	0.0939597	0.033557	0.00671141	219.203	38.3732	446.577	-0.0136913	3.59376	0	0	0	0	0	0	0	0	0	0	0	0	1	0	0	0	0	1	1	0.106667	0.213333	0.34	0	3	0	0	0	0	0	0	29	2	0	0	2
A6NGR9	719	0.386648	0.0403338	0.151599	0.146036	0.0862309	0.0820584	0.0876217	0.0194715	211.579	43.4478	494.339	-0.00663421	3.14942	14.3255	0	0	0	103	0	0	0	1	0	0	0	5	4	0	0	0	0	0	0.219444	0.655556	0.945833	0	25	0	5	0	0	0	0	95	1	0	0	2
A6NGS2	130	0.315385	0.0230769	0.153846	0.0923077	0.215385	0.0923077	0.0846154	0.0230769	213.014	31.8085	463.131	-0.0640769	3.27915	46.1538	0.769231	0	0	60	1	0	0	2	0	0	0	3	3	0	0	0	0	0	0.351145	0.610687	0.938931	0	1	0	0	0	0	0	0	18	0	0	0	0
A6NGU5	568	0.373239	0.0739437	0.200704	0.114437	0.0950704	0.0492958	0.0792254	0.0140845	209.466	34.8102	483.299	0.0513908	3.18276	0	0	0	0	0	0	0	0	0	0	0	0	0	0	1	0.0386643	0.996485	0	0	0.0386643	0.0931459	0	0	20	1	0	0	0	0	0	6	2	0	0	0
A6NGU7	62	0.225806	0.0645161	0.177419	0.290323	0.0645161	0.0806452	0.0645161	0.0322581	227.039	41.4645	439	-0.0208065	3.64806	0	0	0	0	0	0	0	0	0	0	0	0	3	2	0	0	0	0	0	0	0	0	0	0	0	0	0	0	0	0	12	0	0	0	0
A6NGW2	1772	0.357788	0.0643341	0.201467	0.0846501	0.0914221	0.0959368	0.0812641	0.0231377	208.939	36.0183	477.992	0.175999	3.22367	0	0	0	0	0	0	0	0	0	0	0	0	2	0	0	0	0	0	0	0.162437	0.410039	0.760857	1	75	0	0	0	0	0	0	283	3	0	0	0
A6NGZ8	99	0.414141	0.0707071	0.20202	0.0909091	0.0505051	0.0707071	0.0606061	0.040404	211.367	31.8919	479.051	0.395657	3.28889	0	0	0	0	0	0	0	0	0	0	0	0	0	0	1	0.24	0.98	0	0	0.1	0.3	0	1	1	0	0	0	0	0	0	9	2	0	0	0
A6NGY1	282	0.219858	0.0425532	0.294326	0.156028	0.124113	0.0673759	0.0602837	0.035461	212.996	33.9337	471.915	-0.115745	3.1367	61.7021	0	0	0	174	0	0	0	3	0	0	0	4	2	0	0	0	0	0	0	0.215548	0	0	3	0	2	0	0	0	0	27	3	0	0	1
A6NGY3	159	0.245283	0.0628931	0.289308	0.18239	0.0754717	0.0691824	0.0628931	0.0125786	219.296	37.2673	460.447	0.0288679	3.40918	28.9308	0	0	0	46	0	0	0	1	0	0	0	4	3	0	0	0	0	0	0.1375	0.1375	0	0	2	0	0	0	0	0	0	21	0	1	0	0
A6NGY5	319	0.420063	0.106583	0.213166	0.0940439	0.0532915	0.0438871	0.0376176	0.031348	214.038	31.9737	455.912	0.429624	3.49655	0	0	0	0	0	0	0	0	0	0	0	0	0	0	7	0.5	0.99375	0	0	0.10625	0.21875	0	0	0	0	3	0	0	0	0	44	2	2	0	1
A6NH00	312	0.410256	0.112179	0.185897	0.108974	0.0512821	0.0352564	0.0544872	0.0416667	210.524	33.842	461.234	0.341442	3.38587	0	0	0	0	0	0	0	0	0	0	0	0	0	0	7	0.495208	0.99361	0	0	0	0	0	0	0	0	5	0	0	0	0	15	1	0	0	0
A6NH11	291	0.371134	0.0721649	0.137457	0.151203	0.0790378	0.0790378	0.0893471	0.0206186	211.585	45.3625	487.533	0.015567	3.23443	0	0	0	0	0	0	0	0	0	0	0	0	0	0	1	0.0616438	0.993151	0	0	0.140411	0.585616	0.537671	1	17	0	0	0	0	0	0	38	1	3	1	0
A6NH13	148	0.25	0.0472973	0.290541	0.121622	0.0608108	0.101351	0.108108	0.0202703	205.23	39.5189	483.818	-0.0334459	2.93291	69.5946	0	0	0	103	0	0	0	1	0	0	0	4	4	0	0	0	0	0	0	0	0	0	1	0	0	0	0	0	0	20	2	3	0	0
A6NH21	518	0.361004	0.1139	0.189189	0.102317	0.03861	0.0694981	0.0656371	0.0598456	209.236	35.0249	463.027	0.253514	3.31784	0	0	0	0	0	0	0	0	0	0	0	0	0	0	10	0.396917	0.996146	0	0	0.1079	0.150289	0.248555	0	10	0	0	0	0	0	0	53	1	0	1	4
A6NH52	213	0.361502	0.140845	0.178404	0.112676	0.0938967	0.0234742	0.0657277	0.0234742	212.656	33.4671	464.596	0.229343	3.52033	0	0	0	0	0	0	0	0	0	0	0	0	0	0	4	0.397196	0.990654	0	0	0.0654206	0	0	0	1	0	0	0	0	0	0	17	0	0	0	4
A6NH57	179	0.363128	0.0893855	0.223464	0.122905	0.122905	0.0223464	0.0391061	0.0167598	216.995	30.624	441.615	0.247318	3.56642	0	0	0	0	0	0	0	0	0	0	0	0	0	0	0	0	0	0	0	0	0	0	0	1	0	1	0	0	0	0	37	2	0	0	1
A6NHA9	309	0.427184	0.113269	0.187702	0.0906149	0.0485437	0.0420712	0.0485437	0.0420712	211.667	28.4285	449.01	0.417767	3.45155	0	0	0	0	0	0	0	0	0	0	0	0	0	0	7	0.493548	0.993548	0	0	0.0806452	0.0806452	0.270968	0	0	0	1	0	0	0	0	16	2	0	0	0
A6NHC0	703	0.288762	0.106686	0.203414	0.119488	0.136558	0.0412518	0.0782361	0.0256046	213.41	32.3021	466.741	0.035505	3.40326	0	0	0	0	0	0	0	0	0	0	0	0	0	0	0	0	0	4	2	0	0	0	0	16	4	1	0	0	0	0	106	0	0	0	7
A6NHD6	80	0.3125	0.0875	0.2125	0.175	0.075	0.0875	0.0125	0.0375	218.858	39.7612	449.988	-0.067125	3.50975	0	0	0	0	0	0	0	0	0	0	0	0	1	0	0	0	0	0	0	0	0	0	0	2	0	0	0	0	0	0	0	3	0	0	0
A6NHG4	134	0.350746	0.0597015	0.186567	0.11194	0.104478	0.0746269	0.0820896	0.0298507	206.615	35.7388	491.269	0.078806	3.03425	0	0	0	0	0	0	0	0	0	0	0	0	0	0	0	0	0	0	0	0	0	0	0	7	0	1	1	0	0	0	16	3	1	0	0
A6NHG9	310	0.425806	0.132258	0.193548	0.0903226	0.0548387	0.0354839	0.0451613	0.0225806	213.464	27.9571	457.913	0.485935	3.5629	0	0	0	0	0	0	0	0	0	0	0	0	0	0	7	0.495177	0.993569	0	0	0	0.0996785	0	0	0	0	0	0	0	0	0	38	0	1	0	0
A6NHJ4	632	0.186709	0.085443	0.218354	0.267405	0.106013	0.0253165	0.0585443	0.0522152	225.631	33.8155	435.063	-0.0629272	3.61962	4.74684	0	0	0	30	0	0	0	1	0	0	0	6	2	0	0	0	1	1	0.0379147	0	0	0	14	0	10	4	0	0	0	48	2	1	0	0
A6NHL2	446	0.313901	0.0919283	0.197309	0.132287	0.125561	0.0426009	0.0650224	0.0313901	213.308	34.335	460.07	0.0297309	3.36119	0	4.70852	0	0	0	21	0	0	0	1	0	0	0	0	0	0	0	0	0	0.0536913	0.199105	0.10962	0	10	5	8	1	0	1	0	58	0	0	2	0
A6NHM9	499	0.298597	0.116232	0.202405	0.0981964	0.136273	0.0581162	0.0681363	0.0220441	211.293	31.1998	452.832	0.136212	3.42196	0	0	0	0	0	0	0	0	0	0	0	0	0	0	0	0	0	1	1	0.046	0.136	0	1	12	0	0	0	0	0	0	73	4	2	1	0
A6NHN0	477	0.207547	0.0628931	0.169811	0.134172	0.115304	0.0943396	0.194969	0.0209644	202.696	33.3788	500.134	-0.0678407	2.8722	10.2725	0	0.209644	0	49	0	1	0	1	0	0	0	11	7	0	0	0	4	2	0.366109	0.615063	0.707113	1	5	0	6	0	0	1	0	54	2	1	1	0
A6NHN6	443	0.255079	0.0564334	0.198646	0.23702	0.0902935	0.108352	0.0316027	0.0225734	227.404	37.1993	449.682	-0.0391196	3.64835	43.3409	0	0	0	192	0	0	0	3	0	0	0	12	10	1	0.0608108	0.995495	0	0	0.153153	0.376126	0.567568	1	2	0	4	1	0	0	0	75	1	4	0	0
A6NHP3	402	0.246269	0.0995025	0.176617	0.218905	0.139303	0.0771144	0.0273632	0.0149254	228.184	39.2522	434.214	-0.0415423	3.86619	22.8856	0	0	0	92	0	0	0	1	0	0	0	4	4	0	0	0	0	0	0.0719603	0.171216	0.632754	0	10	0	0	0	0	0	0	85	0	0	0	0
A6NHQ2	334	0.287425	0.0598802	0.152695	0.176647	0.0838323	0.0359281	0.200599	0.00299401	206.565	43.5979	511.512	-0.165329	2.92683	29.6407	0	0	0	99	0	0	0	1	0	0	0	5	3	0	0	0	0	0	0.229851	0.274627	0.274627	0	13	0	0	0	1	0	0	43	3	0	0	0
A6NHQ4	379	0.25066	0.0474934	0.147757	0.131926	0.0791557	0.21372	0.100264	0.0290237	203.108	45.0765	482.23	-0.121108	2.91509	71.2401	0	0	0	270	0	0	0	3	0	0	0	11	9	0	0	0	0	0	0.326316	0.736842	0.85	0	6	1	5	0	0	0	0	71	0	0	0	0
A6NHR8	397	0.264484	0.093199	0.141058	0.201511	0.148615	0.0957179	0.0327456	0.02267	224.489	30.5552	440.932	-0.0155164	3.74408	0	0	0	0	0	0	0	0	0	0	0	0	4	0	0	0	0	0	0	0.0753769	0.266332	0.444724	0	8	0	0	0	0	0	0	73	2	2	3	0
A6NHR9	2005	0.297257	0.0778055	0.20399	0.152618	0.13217	0.0593516	0.0618454	0.0149626	217.559	29.9419	462.87	0.0341696	3.44781	2.04489	4.0399	0	0	41	81	0	0	1	2	0	0	7	1	0	0	0	0	0	0.0234297	0.050349	0	0	46	2	25	55	0	9	0	298	0	1	0	4
A6NHS1	94	0.244681	0.0744681	0.159574	0.0744681	0.202128	0.0957447	0.117021	0.0319149	204.265	35.5968	467.745	-0.145851	3.09702	0	0	0	0	0	0	0	0	0	0	0	0	5	3	0	0	0	0	0	0.168421	0.326316	0	0	1	0	0	0	0	0	0	10	3	0	0	0
A6NHS7	340	0.264706	0.0735294	0.317647	0.123529	0.0852941	0.05	0.0441176	0.0411765	214.534	29.6444	458.229	0.186824	3.3215	0	0	0	0	0	0	0	0	0	0	0	0	1	0	1	0.0703812	0.994135	1	1	0	0.222874	0	1	12	0	0	0	0	0	0	7	3	0	0	0
A6NHT5	357	0.327731	0.0644258	0.170868	0.140056	0.109244	0.131653	0.0532213	0.00280112	205.46	38.358	494.319	-0.122689	3.03689	47.0588	0	0	0	168	0	0	0	2	0	0	0	9	8	0	0	0	0	0	0.324022	0.608939	0.815642	0	1	0	7	0	0	0	0	42	0	0	0	0
A6NHX0	329	0.352584	0.0911854	0.227964	0.0942249	0.109422	0.0547112	0.0577508	0.0121581	209.041	31.9906	473.851	0.173556	3.26702	0	0	0	0	0	0	0	0	0	0	0	0	0	0	0	0	0	2	1	0.0272727	0	0	0	8	1	0	2	0	1	0	50	1	1	0	0
A6NHY2	528	0.354167	0.0549242	0.206439	0.179924	0.117424	0.0246212	0.0587121	0.00378788	216.68	33.8966	474.383	0.0402462	3.37561	0	0	0	0	0	0	0	0	0	0	0	0	1	0	0	0	0	1	1	0.0680529	0.109641	0.119093	0	23	0	1	0	0	0	0	61	3	0	0	0
A6NHY6	69	0.26087	0.130435	0.217391	0.130435	0.0869565	0.057971	0.057971	0.057971	215.22	31.7841	440.029	0.0817391	3.52333	0	0	0	0	0	0	0	0	0	0	0	0	0	0	0	0	0	0	0	0	0	0	0	1	0	0	0	0	0	0	8	2	1	0	0
A6NHZ5	514	0.377432	0.0583658	0.173152	0.136187	0.110895	0.0642023	0.0525292	0.0272374	215.167	37.6661	479.42	0.0650195	3.31848	0	0	0	0	0	0	0	0	0	0	0	0	0	0	0	0	0	0	0	0	0.227184	0.456311	0	17	0	1	2	0	0	0	68	0	1	0	0
A6NI03	449	0.267261	0.0935412	0.242762	0.122494	0.138085	0.0534521	0.0356347	0.0467706	216.699	31.4532	437.597	0.065078	3.50122	0	8.90869	0	0	0	40	0	0	0	1	0	0	0	0	0	0	0	1	1	0.0311111	0.131111	0.26	0	20	0	2	0	0	0	0	63	4	0	0	0
A6NI15	193	0.264249	0.0569948	0.248705	0.134715	0.0984456	0.0725389	0.108808	0.015544	209.526	37.4466	490.824	0.00476684	3.09503	20.2073	0	0	0	39	0	0	0	1	0	0	0	6	6	0	0	0	1	1	0.319588	0.376289	0.42268	0	2	0	0	0	0	0	0	33	1	4	2	0
A6NI28	874	0.2746	0.0823799	0.24714	0.149886	0.125858	0.0537757	0.0514874	0.0148741	216.61	30.8208	466.5	0.0450458	3.41708	17.7346	6.63616	0	0	155	58	0	0	2	2	0	0	10	4	0	0	0	4	4	0.0994286	0.148571	0.466286	0	10	3	24	1	0	1	0	139	0	1	0	3
A6NI47	508	0.257874	0.0531496	0.222441	0.175197	0.147638	0.0393701	0.0708661	0.0334646	217.284	29.5667	462.638	-0.0597047	3.34315	28.3465	0	0	0	144	0	0	0	1	0	0	0	4	4	0	0	0	0	0	0	0.0903733	0.145383	0	12	0	2	4	0	0	0	60	0	0	0	2
A6NI56	674	0.341246	0.0356083	0.204748	0.167656	0.145401	0.0326409	0.0608309	0.0118694	221.305	36.1542	485.773	-0.0996884	3.41819	0	25.0742	0	0	0	169	0	0	0	4	0	0	3	1	0	0	0	0	0	0.12	0.52	0.681481	0	17	0	0	0	0	0	0	75	2	1	0	2
A6NI61	221	0.38914	0.140271	0.140271	0.122172	0.0588235	0.0452489	0.0678733	0.0361991	210.734	32.9443	464.534	0.288462	3.45566	0	0	0	0	0	0	0	0	0	0	0	0	0	0	7	0.612613	0.990991	0	0	0.0810811	0.121622	0	0	2	0	4	0	0	0	0	21	2	1	0	0
A6NI72	391	0.265985	0.0895141	0.204604	0.171355	0.12532	0.0792839	0.0537084	0.0102302	219.405	35.8018	454.836	-0.0437596	3.53944	26.8542	0	0	0	105	0	0	0	2	0	0	0	6	3	0	0	0	3	2	0.0357143	0.147959	0.441327	0	7	1	0	0	0	0	0	72	5	2	0	0
A6NI73	299	0.301003	0.0769231	0.244147	0.110368	0.0869565	0.083612	0.0802676	0.0167224	209.049	37.1378	468.793	0.0918729	3.23321	0	0	0	0	0	0	0	0	0	0	0	0	2	1	1	0.0533333	0.993333	2	1	0.0733333	0.09	0	0	19	0	2	0	0	0	0	5	3	0	0	0
A6NI74	363	0.358127	0.0358127	0.236915	0.126722	0.107438	0.0330579	0.077135	0.0247934	213.454	26.4612	474.835	0.193196	3.21959	0	0	0	0	0	0	0	0	0	0	0	0	0	0	0	0	0	1	1	0.032967	0.233516	0.228022	0	6	0	0	0	0	0	0	113	0	1	0	0
A6NI79	296	0.277027	0.0405405	0.22973	0.185811	0.189189	0.0472973	0.0202703	0.0101351	227.643	31.3378	455.328	-0.112838	3.66743	16.2162	39.527	0	0	48	117	0	0	1	3	0	0	4	2	0	0	0	0	0	0.181818	0.56229	0.713805	0	3	0	4	0	0	0	0	39	1	2	1	3
A6NI86	522	0.247126	0.0268199	0.203065	0.168582	0.233716	0.0440613	0.0555556	0.0210728	225.889	33.6435	462.295	-0.244061	3.55944	26.2452	15.1341	0	0	137	79	0	0	3	2	0	0	10	5	0	0	0	0	0	0.502868	0.701721	0.676864	0	0	0	4	0	0	0	0	53	1	0	0	4
A6NI87	242	0.289256	0.0743802	0.260331	0.161157	0.0743802	0.0743802	0.0495868	0.0165289	217.126	42.2715	459.116	0.0527273	3.43413	18.1818	0	0	0	44	0	0	0	1	0	0	0	2	2	0	0	0	0	0	0.152263	0.205761	0.246914	0	10	0	1	0	0	0	0	29	2	1	0	0
A6NIE6	340	0.341176	0.0794118	0.229412	0.108824	0.126471	0.0529412	0.0441176	0.0176471	213.649	30.5941	464.224	0.184147	3.37726	0	0	0	0	0	0	0	0	0	0	0	0	0	0	0	0	0	0	0	0.0733138	0	0	0	10	0	0	1	0	0	0	60	1	2	0	0
A6NIE9	313	0.316294	0.0830671	0.191693	0.102236	0.0734824	0.105431	0.0990415	0.028754	207.846	37.4089	466.214	0.0846645	3.22415	0	0	0	0	0	0	0	0	0	0	0	0	0	0	0	0	0	1	1	0.136943	0.315287	0.433121	0	7	0	0	0	0	0	0	48	0	0	0	0
A6NIH7	251	0.286853	0.0996016	0.167331	0.151394	0.155378	0.0438247	0.0796813	0.0159363	213.782	34.6195	468.932	-0.0641434	3.36004	0	0	0	0	0	0	0	0	0	0	0	0	1	1	0	0	0	0	0	0.15873	0.154762	0.297619	0	6	4	0	2	0	1	0	43	0	0	0	0
A6NIJ5	464	0.258621	0.0301724	0.224138	0.174569	0.0905172	0.12931	0.0689655	0.0237069	212.46	40.0625	476.455	-0.121056	3.12308	78.8793	0	0	0	366	0	0	0	3	0	0	0	13	10	0	0	0	0	0	0.126882	0.341935	0.746237	0	0	0	0	0	0	0	0	62	6	0	0	0
A6NIJ9	312	0.403846	0.13141	0.240385	0.0929487	0.0448718	0.025641	0.025641	0.0352564	216.564	28.7596	457	0.474904	3.59228	0	0	0	0	0	0	0	0	0	0	0	0	0	0	7	0.492013	0.99361	0	0	0.0383387	0.246006	0.607029	0	0	1	0	0	0	0	0	38	2	0	0	0
A6NIK2	292	0.339041	0.0582192	0.119863	0.150685	0.140411	0.0890411	0.0924658	0.010274	217.888	42.4818	480.675	0.0461644	3.41373	10.274	0	0	0	30	0	0	0	1	0	0	0	2	2	0	0	0	0	0	0.194539	0.665529	0.982935	0	6	0	1	0	0	0	0	42	0	1	0	0
A6NIL9	109	0.40367	0.100917	0.192661	0.110092	0.0917431	0.0642202	0.0275229	0.00917431	215.432	32.0771	464.183	0.219633	3.51385	0	0	0	0	0	0	0	0	0	0	0	0	0	0	1	0.190909	0.981818	0	0	0.109091	0	0	0	1	0	0	0	0	0	0	26	0	0	0	0
A6NIM6	579	0.369603	0.132988	0.217617	0.0915371	0.0569948	0.0328152	0.0621762	0.0362694	212.423	30.3416	458.834	0.3962	3.49689	0	0	0	0	0	0	0	0	0	0	0	0	0	0	12	0.444828	0.996552	0	0	0.0517241	0.0517241	0	0	2	0	0	0	0	0	0	79	2	1	0	0
A6NIN4	97	0.278351	0.0515464	0.113402	0.195876	0.195876	0.0515464	0.0824742	0.0309278	219.43	41.6175	482.454	-0.246907	3.35495	34.0206	0	0	0	33	0	0	0	1	0	0	0	2	2	0	0	0	0	0	0.22449	0.693878	0.785714	0	3	0	0	0	0	0	0	25	0	1	0	1
A6NIR3	686	0.27551	0.0568513	0.294461	0.129738	0.109329	0.0510204	0.0539359	0.0291545	212.207	32.3103	465.292	0.0543878	3.21723	10.2041	0	0	0	70	0	0	0	2	0	0	0	13	8	0	0	0	2	2	0.0989811	0.179039	0.122271	0	13	0	0	0	0	0	0	101	2	1	0	3
A6NIU2	74	0.283784	0.0540541	0.22973	0.148649	0.189189	0.0405405	0.027027	0.027027	221.247	34.4878	467.432	-0.00121622	3.47068	0	0	0	0	0	0	0	0	0	0	0	0	1	0	0	0	0	0	0	0.226667	0	0	0	2	0	0	0	0	0	0	7	1	4	0	0
A6NIV6	560	0.328571	0.0607143	0.207143	0.1625	0.117857	0.05	0.0517857	0.0214286	221.742	27.6191	466.157	0.197071	3.55121	5.53571	0	0	0	31	0	0	0	1	0	0	0	1	1	0	0	0	1	1	0.13369	0.440285	0.573975	0	2	0	0	0	0	0	0	95	0	0	0	0
A6NIX2	430	0.267442	0.055814	0.146512	0.139535	0.0976744	0.0953488	0.139535	0.0581395	206.22	42.773	486.081	-0.132116	2.93253	42.093	0	0	0	181	0	0	0	2	0	0	0	4	3	0	0	0	3	1	0.364269	0.591647	0.607889	0	7	2	10	0	0	0	0	48	1	0	0	1
A6NIY4	402	0.253731	0.0945274	0.171642	0.216418	0.136816	0.0771144	0.0373134	0.0124378	227.825	39.7057	440.351	-0.0550995	3.83117	22.8856	0	0	0	92	0	0	0	1	0	0	0	4	3	0	0	0	0	0	0.0818859	0.290323	0.687345	0	9	0	2	0	0	0	0	86	0	0	0	1
A6NIZ1	184	0.315217	0.076087	0.233696	0.130435	0.141304	0.0217391	0.0597826	0.0217391	218.876	28.5576	464.929	-0.050163	3.45543	0	0	0	0	0	0	0	0	0	0	0	0	0	0	0	0	0	0	0	0	0	0	0	4	3	2	5	0	0	0	21	2	1	0	0
A6NJ08	208	0.317308	0.0288462	0.168269	0.206731	0.0769231	0.105769	0.0769231	0.0192308	219.49	44.7909	472.486	-0.0805769	3.32067	30.2885	0	0	0	63	0	0	0	2	0	0	0	6	6	0	0	0	0	0	0.0574163	0.301435	0.650718	0	0	0	0	0	0	0	0	28	0	0	0	0
A6NJ46	265	0.237736	0.0867925	0.25283	0.143396	0.090566	0.0830189	0.0943396	0.0113208	209.614	36.7306	477.26	-0.00471698	3.19298	30.1887	0	0	0	80	0	0	0	2	0	0	0	4	4	0	0	0	0	0	0.0864662	0.210526	0.263158	0	6	0	2	0	0	1	0	37	3	0	0	0
A6NJ64	397	0.24937	0.0579345	0.196474	0.229219	0.108312	0.093199	0.0403023	0.0251889	223.872	37.2607	451.924	-0.0623678	3.55582	44.5844	0	0	0	177	0	0	0	2	0	0	0	10	7	1	0.0628141	0.994975	0	0	0.145729	0.38191	0.603015	0	1	0	0	1	0	0	0	66	4	2	0	0
A6NJ69	53	0.301887	0.113208	0.283019	0.132075	0.0188679	0.0188679	0.0566038	0.0754717	212.5	31.0132	441.774	0.202453	3.35057	0	0	0	0	0	0	0	0	0	0	0	0	0	0	0	0	0	0	0	0	0	0	0	0	0	0	0	0	0	0	6	0	0	1	0
A6NJ78	407	0.331695	0.0737101	0.208845	0.154791	0.115479	0.046683	0.0565111	0.012285	217.717	34.2536	459.993	0.0563882	3.46162	0	0	0	0	0	0	0	0	0	0	0	0	2	0	0	0	0	0	0	0	0	0	0	12	16	2	3	1	0	0	60	0	0	0	6
A6NJ88	616	0.316558	0.0616883	0.269481	0.126623	0.12013	0.0535714	0.0357143	0.0162338	214.122	28.5899	452.893	0.0620942	3.34693	8.11688	0	0	0	50	0	0	0	1	0	0	0	7	3	0	0	0	0	0	0.0372771	0.0372771	0	0	11	0	4	0	0	0	0	80	0	0	0	0
A6NJB7	356	0.255618	0.0561798	0.224719	0.134831	0.0674157	0.179775	0.0702247	0.011236	210.457	41.7817	464.247	-0.0105056	3.22419	44.382	0	0	0	158	0	0	0	3	0	0	0	6	4	0	0	0	0	0	0.176471	0.602241	0.770308	0	4	0	3	0	0	0	0	71	0	0	0	1
A6NJG2	315	0.336508	0.0507937	0.168254	0.168254	0.101587	0.0571429	0.104762	0.0126984	209.843	45.6317	494.94	-0.0492698	3.09584	12.381	0	0	0	39	0	0	0	1	0	0	0	6	5	0	0	0	0	0	0.142405	0.677215	0.943038	0	4	0	0	0	1	0	0	42	0	0	0	0
A6NJG6	315	0.244444	0.107937	0.330159	0.101587	0.0920635	0.0888889	0.0253968	0.00952381	212.444	32.9292	453.825	0.119968	3.41498	11.746	0	0	0	37	0	0	0	1	0	0	0	6	2	0	0	0	0	0	0.0664557	0.205696	0.427215	0	5	0	0	0	0	0	0	65	1	0	0	0
A6NJI1	115	0.208696	0.0695652	0.269565	0.173913	0.0956522	0.0782609	0.104348	0	221.765	48.273	466.209	-0.154522	3.50357	40.8696	0	0	0	47	0	0	0	1	0	0	0	4	2	0	0	0	0	0	0	0.646552	0.965517	0	0	0	2	0	0	0	0	17	2	0	0	0
A6NJI9	287	0.317073	0.0905923	0.209059	0.1777	0.121951	0.0418118	0.0278746	0.0139373	224.004	31.8941	449.509	0.140801	3.71404	0	0	0	0	0	0	0	0	0	0	0	0	1	0	0	0	0	1	1	0.0972222	0.09375	0.399306	0	9	0	0	0	0	0	0	52	1	2	1	1
A6NJJ6	358	0.27933	0.103352	0.203911	0.0865922	0.114525	0.122905	0.0670391	0.0223464	209.472	34.8411	460.846	0.0842458	3.33511	23.743	0	0	0	85	0	0	0	1	0	0	0	3	3	0	0	0	0	0	0.0947075	0.398329	0.233983	0	5	0	4	0	0	0	0	81	0	0	0	1
A6NJL1	495	0.230303	0.0505051	0.242424	0.183838	0.121212	0.0848485	0.0565657	0.030303	218.099	35.5851	451.059	-0.0884646	3.37949	39.1919	0	0	0	194	0	0	0	2	0	0	0	10	6	0	0	0	1	1	0	0	0.149194	0	13	0	6	0	0	0	0	50	2	4	1	2
A6NJQ4	464	0.260776	0.0280172	0.219828	0.172414	0.0905172	0.135776	0.0711207	0.0215517	211.131	39.7263	479.489	-0.127823	3.0781	81.8966	0	0	0	380	0	0	0	3	0	0	0	10	9	0	0	0	0	0	0.0602151	0.380645	0.774194	0	0	0	0	0	0	0	0	53	6	0	0	0
A6NJR5	290	0.27931	0.124138	0.127586	0.17931	0.168966	0.0758621	0.0275862	0.0172414	223.425	34.5803	437.845	-0.0174138	3.848	0	0	0	0	0	0	0	0	0	0	0	0	2	2	0	0	0	0	0	0.120275	0.233677	0.474227	0	7	0	0	0	0	0	0	62	4	0	0	0
A6NJT0	531	0.286252	0.047081	0.141243	0.126177	0.101695	0.158192	0.122411	0.0169492	197.726	40.8627	501.942	-0.157232	2.73151	57.8154	0	0	0	307	0	0	0	3	0	0	0	9	8	0	0	0	0	0	0.453008	0.753759	0.759398	0	3	0	5	0	0	0	0	80	2	0	0	0
A6NJU9	1138	0.252197	0.0254833	0.219684	0.181019	0.106327	0.174868	0.0272408	0.013181	217.187	38.116	457.374	-0.0300176	3.31687	69.5079	0	0	0	791	0	0	0	3	0	0	0	18	10	1	0.0210711	0.998244	0	0	0.19403	0.252853	0.855136	0	2	0	0	0	0	0	0	246	4	0	0	32
A6NJV1	201	0.218905	0.134328	0.228856	0.18408	0.0696517	0.104478	0.0497512	0.00995025	219.108	38.1124	440.114	0.089602	3.67055	0	0	0	0	0	0	0	0	0	0	0	0	1	0	0	0	0	0	0	0	0.212871	0	0	9	0	0	0	0	0	0	35	0	0	0	2
A6NJW4	275	0.370909	0.0581818	0.207273	0.0945455	0.08	0.0618182	0.0981818	0.0290909	206.804	37.2436	487.411	0.0916727	3.07829	0	0	0	0	0	0	0	0	0	0	0	0	0	0	2	0.15942	0.992754	2	2	0.0217391	0.105072	0.268116	0	7	0	4	0	0	0	0	47	3	2	0	0
A6NJW9	211	0.35545	0.0663507	0.21327	0.161137	0.0663507	0.0521327	0.0521327	0.0331754	220.062	34.5844	466.981	0.146588	3.481	0	0	0	0	0	0	0	0	0	0	0	0	0	0	1	0.103774	0.990566	1	1	0.198113	0.174528	0.339623	1	7	0	0	0	0	0	0	12	0	0	0	0
A6NJY1	282	0.429078	0.0886525	0.195035	0.0921986	0.0673759	0.035461	0.0744681	0.0177305	210.056	30.6011	478.28	0.345851	3.31156	0	0	0	0	0	0	0	0	0	0	0	0	0	0	8	0.575972	0.992933	0	0	0	0.144876	0.226148	0	0	0	0	0	0	0	0	31	2	0	0	0
A6NJY4	79	0.531646	0.113924	0.101266	0.0379747	0.0632911	0.0379747	0.0759494	0.0379747	209.514	30.1241	490.468	0.662278	3.44835	0	0	0	0	0	0	0	0	0	0	0	0	0	0	2	0.575	0.975	0	0	0.5375	0.975	0.975	0	1	0	0	0	0	0	0	5	2	0	0	0
A6NJZ3	312	0.413462	0.121795	0.246795	0.0801282	0.0480769	0.0352564	0.0288462	0.025641	213.172	28.7429	453.375	0.491122	3.52362	0	6.73077	0	0	0	21	0	0	0	1	0	0	0	0	7	0.498403	0.99361	0	0	0	0.13738	0.345048	0	0	0	2	0	0	0	0	39	1	1	0	0
A6NJZ7	1639	0.28371	0.0500305	0.214765	0.14399	0.128127	0.0793167	0.0744356	0.0256254	214.047	37.6477	471.561	-0.10961	3.25232	19.036	14.6431	0	0	312	240	0	0	5	6	0	0	20	18	0	0	0	5	2	0.139634	0.414024	0.503049	0	46	0	12	11	0	0	0	190	1	0	0	1
A6NK02	468	0.271368	0.0854701	0.220085	0.160256	0.123932	0.0598291	0.0384615	0.0405983	220.28	31.0464	449.739	0.0347863	3.54011	0	0	0	0	0	0	0	0	0	0	0	0	1	1	0	0	0	1	1	0.0490405	0.204691	0.272921	0	11	0	0	0	0	0	0	75	1	2	0	0
A6NK06	481	0.35343	0.0831601	0.212058	0.128898	0.0935551	0.0623701	0.0540541	0.012474	210.086	34.0848	476.584	0.115447	3.2548	0	0	0	0	0	0	0	0	0	0	0	0	0	0	0	0	0	0	0	0	0	0	0	13	0	1	0	0	0	0	79	4	2	0	1
A6NK44	160	0.30625	0.06875	0.1625	0.16875	0.13125	0.0875	0.05	0.025	219.488	32.2088	441.337	0.0980625	3.55262	0	0	0	0	0	0	0	0	0	0	0	0	0	0	0	0	0	1	1	0	0	0	0	2	0	0	0	0	0	0	19	0	0	1	1
A6NK53	670	0.185075	0.080597	0.256716	0.202985	0.116418	0.0268657	0.0791045	0.0522388	220.173	32.2157	441.988	-0.0833582	3.47154	0	0	0	0	0	0	0	0	0	0	0	0	3	1	0	0	0	1	1	0.0178838	0	0	0	27	0	14	3	0	0	0	55	7	0	0	4
A6NK58	231	0.359307	0.047619	0.134199	0.147186	0.0995671	0.0692641	0.103896	0.038961	214.646	40.7104	481.407	0.0177056	3.24563	0	0	0	0	0	0	0	0	0	0	0	0	0	0	0	0	0	1	1	0.0474138	0.568966	0.62069	0	10	0	0	0	0	0	0	28	1	2	1	2
A6NK59	587	0.357751	0.0783646	0.192504	0.134583	0.109029	0.044293	0.0562181	0.0272572	213.619	30.2489	467.68	0.149744	3.35448	0	0	0	0	0	0	0	0	0	0	0	0	1	0	0	0	0	1	1	0	0.132653	0.161565	0	14	1	2	0	0	0	0	69	0	1	1	0
A6NK75	572	0.190559	0.0909091	0.22028	0.241259	0.0996503	0.0314685	0.0611888	0.0646853	223.608	28.0589	449.25	-0.0161888	3.54077	0	0	0	0	0	0	0	0	0	0	0	0	0	0	0	0	0	1	1	0.0244328	0	0	0	12	0	21	20	0	0	0	49	1	0	1	3
A6NK89	507	0.284024	0.0315582	0.207101	0.157791	0.171598	0.0631164	0.061144	0.0236686	218.464	38.2905	469.071	-0.178225	3.33006	48.5207	10.4536	0	0	246	53	0	0	6	2	0	0	13	9	0	0	0	1	1	0.283465	0.590551	0.875984	0	6	0	4	0	0	0	0	54	0	0	0	0
A6NK97	555	0.392793	0.0990991	0.205405	0.0900901	0.0630631	0.045045	0.0756757	0.0288288	208.508	35.2584	478.715	0.234829	3.25461	0	0	0	0	0	0	0	0	0	0	0	0	0	0	12	0.44964	0.996403	0	0	0.0809353	0.0611511	0.118705	0	10	0	0	0	0	0	0	37	0	0	0	0
A6NKB5	2137	0.301825	0.0800187	0.253627	0.124006	0.103884	0.0533458	0.0598971	0.0233973	212.802	33.5902	466.198	0.110042	3.32158	35.4235	0	0	0	757	0	0	0	10	0	0	0	25	20	15	0.131899	0.999065	0	0	0.0898036	0.149205	0.302619	0	14	0	26	0	0	0	0	265	4	1	0	9
A6NKC0	464	0.256466	0.0301724	0.221983	0.170259	0.0905172	0.140086	0.0689655	0.0215517	211.281	39.6683	477.039	-0.122112	3.09644	81.4655	0	0	0	378	0	0	0	3	0	0	0	12	11	0	0	0	0	0	0.0860215	0.249462	0.776344	0	0	0	6	0	0	0	0	53	6	0	0	0
A6NKC9	451	0.24612	0.075388	0.235033	0.135255	0.124169	0.0886918	0.0842572	0.0110865	211.421	37.498	468.499	-0.0177384	3.25692	39.0244	0	0	0	176	0	0	0	3	0	0	0	11	9	0	0	0	1	1	0.0663717	0.0663717	0.168142	0	2	0	4	0	0	0	0	67	0	0	0	1
A6NKD2	308	0.318182	0.0779221	0.181818	0.146104	0.159091	0.0519481	0.0519481	0.012987	216.709	34.7932	459.753	-0.0948377	3.45942	9.74026	0	0	0	30	0	0	0	1	0	0	0	3	2	0	0	0	0	0	0.122977	0.33657	0.478964	0	7	0	0	0	0	0	0	39	3	0	0	2
A6NKD9	419	0.295943	0.0310263	0.186158	0.167064	0.138425	0.0692124	0.100239	0.0119332	211.579	38.8597	491.442	-0.13148	3.10131	44.1527	24.5823	0	0	185	103	0	0	2	3	0	0	5	4	0	0	0	0	0	0.35	0.690476	0.795238	0	2	21	14	2	0	0	0	43	4	0	0	5
A6NKF1	404	0.366337	0.0420792	0.116337	0.153465	0.111386	0.111386	0.0717822	0.0272277	212.408	43.3347	487.309	-0.156733	3.15559	28.9604	0	0	0	117	0	0	0	2	0	0	0	5	4	0	0	0	1	1	0.276543	0.57284	0.792593	0	8	1	5	3	0	1	0	55	1	0	0	2
A6NKF2	412	0.296117	0.0485437	0.182039	0.109223	0.118932	0.148058	0.0849515	0.0121359	207.242	36.4903	480.58	-0.0501214	3.08544	46.1165	0	0	0	190	0	0	0	4	0	0	0	12	8	0	0	0	2	2	0.288136	0.554479	0.687651	0	9	1	0	0	0	0	0	76	1	0	0	0
A6NKF7	163	0.386503	0.0429448	0.0981595	0.116564	0.0797546	0.147239	0.104294	0.0245399	205.993	44.011	496.62	0.0802454	3.03331	0	0	0	0	0	0	0	0	0	0	0	0	0	0	2	0.29878	0.987805	0	0	0.579268	0.878049	0.859756	0	3	0	1	0	0	0	0	23	0	0	0	0
A6NKG5	1358	0.308542	0.083947	0.202504	0.126657	0.14433	0.0721649	0.0493373	0.0125184	215.548	34.5759	449.215	0.0574006	3.49425	17.894	0	0	0	243	0	0	0	3	0	0	0	8	6	3	0.0375276	0.998528	0	0	0.0610743	0.217071	0.300957	0	23	0	2	1	0	0	0	196	0	0	0	0
A6NKH3	93	0.290323	0.0645161	0.225806	0.268817	0.0430108	0	0.0537634	0.0537634	226.165	32.3871	461.806	-0.0105376	3.51452	0	0	0	0	0	0	0	0	0	0	0	0	0	0	0	0	0	0	0	0	0	0	0	2	0	0	0	0	0	0	10	1	2	0	0
A6NKK0	313	0.402556	0.134185	0.198083	0.0990415	0.0543131	0.0447284	0.0415335	0.0255591	213.742	28.4974	457.69	0.430256	3.55597	0	0	0	0	0	0	0	0	0	0	0	0	0	0	7	0.506369	0.993631	0	0	0	0.127389	0	0	0	0	1	0	0	0	0	46	1	1	0	0
A6NKL6	621	0.301127	0.0402576	0.222222	0.136876	0.0805153	0.10467	0.101449	0.0128824	204.182	42.6576	508.427	-0.100081	2.84089	53.6232	0	0	0	333	0	0	0	3	0	0	0	11	9	2	0.073955	0.996785	0	0	0.369775	0.68328	0.815113	0	9	0	6	0	0	0	0	108	2	1	0	0
A6NKN8	68	0.25	0.0294118	0.235294	0.191176	0.191176	0.0441176	0.0588235	0	217.523	27.6721	499.088	-0.265294	3.18603	100	0	0	0	68	0	0	0	1	0	0	0	2	1	0	0	0	1	1	0.391304	0.753623	0.956522	0	0	0	1	0	0	0	0	11	2	0	0	0
A6NKP2	422	0.353081	0.0829384	0.175355	0.156398	0.0853081	0.0592417	0.0758294	0.0118483	214.983	37.8602	477.36	0.0421327	3.37415	7.58294	0	0	0	32	0	0	0	1	0	0	0	2	1	3	0.125296	0.995272	0	0	0.0851064	0.222222	0.335697	0	13	0	0	0	0	0	0	69	0	0	0	0
A6NKQ9	187	0.299465	0.0481283	0.181818	0.139037	0.0802139	0.128342	0.0588235	0.0641711	214.473	37.7818	457.037	0.0174866	3.24914	0	0	0	0	0	0	0	0	0	0	0	0	0	0	0	0	0	0	0	0.143617	0.106383	0.281915	1	3	0	2	0	0	0	0	33	6	1	0	2
A6NKT7	1758	0.283276	0.0807736	0.234357	0.149602	0.142207	0.0420933	0.0540387	0.0136519	215.872	30.0548	475.684	-0.00115472	3.38367	7.84983	6.65529	0	0	138	117	0	0	4	4	0	0	17	9	0	0	0	3	2	0.0801592	0.19784	0.399659	0	22	4	112	59	3	2	0	265	0	0	0	1
A6NKU9	549	0.260474	0.0819672	0.125683	0.183971	0.180328	0.0983607	0.0346084	0.0346084	223.218	34.7543	454.403	-0.147814	3.63033	13.8434	0	0	0	76	0	0	0	1	0	0	0	10	7	0	0	0	0	0	0.129091	0.343636	0.196364	0	12	0	1	0	0	0	0	151	3	0	0	0
A6NKW6	160	0.3125	0.11875	0.2375	0.09375	0.0875	0.03125	0.06875	0.05	209.273	28.5606	471.356	0.1495	3.26669	0	0	0	0	0	0	0	0	0	0	0	0	0	0	1	0.173913	0.987578	0	0	0.242236	0.428571	0	0	3	0	1	0	0	0	0	17	0	1	0	1
A6NKX1	122	0.278689	0.057377	0.221311	0.196721	0.0737705	0.057377	0.0819672	0.0327869	218.696	38.8107	448.77	0.0752459	3.42738	0	0	0	0	0	0	0	0	0	0	0	0	2	1	0	0	0	0	0	0	0	0	0	5	0	0	0	0	0	0	11	1	1	0	0
A6NKX4	556	0.419065	0.073741	0.154676	0.0971223	0.0539568	0.0773381	0.104317	0.0197842	206.644	42.1129	507.162	0.208723	3.10808	0	0	0	0	0	0	0	0	0	0	0	0	0	0	12	0.450628	0.996409	0	0	0.355476	0.777379	0.933573	0	15	0	2	0	0	0	0	48	0	1	0	1
A6NL05	159	0.257862	0.0566038	0.207547	0.194969	0.144654	0.0503145	0.0628931	0.0251572	224.557	42.1296	465.522	-0.171509	3.53604	28.3019	0	0	0	45	0	0	0	1	0	0	0	1	0	1	0.11875	0.9875	0	0	0.06875	0	0.46875	0	2	0	0	0	0	0	0	19	1	0	0	0
A6NL08	312	0.403846	0.125	0.259615	0.0865385	0.0352564	0.0352564	0.0224359	0.0320513	214.715	30.6462	450.683	0.47766	3.55974	0	0	0	0	0	0	0	0	0	0	0	0	0	0	7	0.482428	0.99361	0	0	0.0415335	0.255591	0	0	2	0	3	0	1	0	0	41	2	0	0	0
A6NL26	309	0.385113	0.132686	0.223301	0.0841424	0.0582524	0.0355987	0.0517799	0.0291262	208.55	31.1233	466.421	0.361877	3.36142	0	0	0	0	0	0	0	0	0	0	0	0	0	0	7	0.503226	0.993548	0	0	0	0.103226	0	0	0	0	3	0	0	0	0	17	0	0	0	0
A6NL46	340	0.264706	0.0382353	0.217647	0.197059	0.0794118	0.120588	0.0705882	0.0117647	219.048	39.8629	472.412	-0.0475588	3.35891	69.1176	0	0	0	235	0	0	0	3	0	0	0	11	9	0	0	0	0	0	0.202346	0.416422	0.489736	0	0	0	1	0	0	0	0	46	3	1	0	0
A6NL82	134	0.253731	0.0746269	0.179104	0.238806	0.141791	0.0671642	0.0373134	0.00746269	227.379	33.3537	428.701	-0.025597	3.80067	0	0	0	0	0	0	0	0	0	0	0	0	3	3	0	0	0	0	0	0	0	0	0	1	0	0	0	0	0	0	13	1	1	0	3
A6NL88	538	0.288104	0.0520446	0.184015	0.148699	0.0613383	0.115242	0.13197	0.0185874	204.571	44.6262	492.078	0.00546468	2.94314	44.2379	0	0	0	238	0	0	0	4	0	0	0	7	6	1	0.0333952	0.996289	0	0	0.296846	0.671614	0.892393	1	8	0	6	0	0	0	0	69	1	2	0	1
A6NL99	342	0.388889	0.105263	0.175439	0.102339	0.0614035	0.0584795	0.0994152	0.00877193	206.391	36.6278	467.74	0.279854	3.28278	0	0	0	0	0	0	0	0	0	0	0	0	0	0	6	0.314869	0.994169	0	0	0.0349854	0	0.218659	0	6	0	0	0	0	0	0	32	5	1	0	0
A6NLC5	250	0.244	0.068	0.24	0.12	0.152	0.088	0.032	0.056	210.446	30.7052	443.096	-0.0174	3.2442	19.2	0	0	0	48	0	0	0	1	0	0	0	2	2	0	0	0	0	0	0.0836653	0.195219	0.366534	0	6	0	2	0	0	0	0	47	0	0	0	0
A6NLC8	198	0.313131	0.040404	0.161616	0.166667	0.171717	0.0606061	0.0707071	0.0151515	215.894	33.3808	475.601	-0.132071	3.27985	50.5051	0	0	0	100	0	0	0	1	0	0	0	4	3	0	0	0	0	0	0.0653266	0.301508	0	0	1	0	0	0	0	0	0	23	0	0	1	0
A6NLE4	172	0.313953	0.0813953	0.203488	0.127907	0.180233	0.0232558	0.0523256	0.0174419	219.678	31.1483	460.116	0.0102907	3.60541	0	12.2093	0	0	0	21	0	0	0	1	0	0	0	0	0	0	0	0	0	0.387283	0.34104	0.445087	0	5	0	0	0	0	0	0	5	2	0	0	1
A6NLF2	546	0.260073	0.043956	0.205128	0.184982	0.117216	0.102564	0.0769231	0.00915751	214.227	40.8577	477.712	-0.209469	3.20264	56.2271	0	0	0	307	0	0	0	2	0	0	0	12	8	0	0	0	1	1	0.146252	0.394881	0.519196	0	0	0	2	0	0	0	0	76	4	1	0	0
A6NLI5	450	0.271111	0.0933333	0.246667	0.122222	0.128889	0.0533333	0.0355556	0.0488889	216.231	30.5682	436.664	0.0807778	3.48884	0	8.88889	0	0	0	40	0	0	0	1	0	0	1	0	0	0	0	1	1	0.0576497	0.141907	0.128603	0	23	0	0	0	0	0	0	65	0	0	0	0
A6NLJ0	364	0.315934	0.032967	0.131868	0.178571	0.0961538	0.10989	0.101648	0.032967	213.716	48.4676	501.786	-0.137363	3.08206	29.6703	0	0	0	108	0	0	0	2	0	0	0	6	3	0	0	0	1	1	0.419178	0.761644	0.994521	0	13	0	0	0	0	0	0	59	1	0	0	0
A6NLP5	189	0.354497	0.047619	0.15873	0.137566	0.164021	0.042328	0.0846561	0.010582	214.924	40.4651	485.153	-0.167778	3.24751	0	0	0	0	0	0	0	0	0	0	0	0	2	2	0	0	0	0	0	0.136842	0.547368	0.968421	0	4	0	0	0	0	0	0	15	2	0	0	1
A6NLU0	287	0.299652	0.0836237	0.202091	0.142857	0.114983	0.0487805	0.0592334	0.0487805	216.472	32.6585	457.843	0.00439024	3.40139	0	0	0	0	0	0	0	0	0	0	0	0	0	0	0	0	0	1	1	0	0.0868056	0	0	10	2	1	0	0	0	0	52	4	0	0	0
A6NLU5	285	0.357895	0.045614	0.210526	0.136842	0.0982456	0.0807018	0.0631579	0.00701754	207.833	39.4491	494.628	-0.0278947	3.04158	37.8947	0	0	0	108	0	0	0	1	0	0	0	5	3	0	0	0	1	1	0.339161	0.503497	0.496503	1	7	0	2	0	0	0	0	10	3	2	1	0
A6NLU8	196	0.27551	0.0663265	0.25	0.173469	0.117347	0.0867347	0.0102041	0.0204082	221.962	31.6796	448.199	0.0495408	3.55602	32.6531	0	0	0	64	0	0	0	1	0	0	0	2	2	0	0	0	1	1	0.13198	0.294416	0.451777	0	3	0	0	0	0	0	0	22	6	5	0	0
A6NLW8	204	0.210784	0.0833333	0.284314	0.186275	0.127451	0.0441176	0.0539216	0.00980392	223.817	36.6402	448.691	-0.0720588	3.61284	34.3137	0	0	0	70	0	0	0	2	0	0	0	5	4	0	0	0	0	0	0	0	0	0	2	0	0	0	0	0	0	12	0	0	0	0
A6NLX3	237	0.278481	0.113924	0.177215	0.139241	0.172996	0.0801688	0.0295359	0.00843882	218.479	33.8131	445.553	-0.0214346	3.68165	31.2236	0	0	0	74	0	0	0	1	0	0	0	3	2	0	0	0	0	0	0.117647	0.344538	0.428571	0	0	0	0	0	0	0	0	41	2	1	0	2
A6NLX4	147	0.421769	0.0408163	0.136054	0.047619	0.122449	0.122449	0.0680272	0.0408163	204.135	31.4599	483.374	0.111156	3.03231	0	0	0	0	0	0	0	0	0	0	0	0	1	0	2	0.290541	0.986486	0	0	0.27027	0.797297	0.790541	0	2	0	0	0	0	0	0	32	3	0	1	1
A6NM03	316	0.449367	0.101266	0.186709	0.0949367	0.0537975	0.0443038	0.0474684	0.0221519	212.72	32.0832	466.491	0.458671	3.45861	0	0	0	0	0	0	0	0	0	0	0	0	0	0	7	0.501577	0.993691	0	0	0.0725552	0.0946372	0.274448	0	0	0	3	0	0	0	0	31	0	0	0	0
A6NM10	295	0.383051	0.0949153	0.19661	0.0983051	0.0576271	0.0644068	0.0813559	0.0237288	204.732	37.9793	493.081	0.200542	3.11942	11.8644	0	0	0	35	0	0	0	1	0	0	0	0	0	4	0.233108	0.993243	0	0	0.0371622	0.537162	0.827703	1	5	0	0	0	0	0	0	24	3	1	1	1
A6NM11	1700	0.26	0.0529412	0.286471	0.118824	0.124706	0.104118	0.0405882	0.0123529	212.486	31.0739	459.405	0.0460059	3.2838	54.8824	0	0	0	933	0	0	0	6	0	0	0	26	24	1	0.0141093	0.998824	0	0	0.0970018	0.377425	0.579071	1	13	0	7	0	0	0	0	20	0	0	0	7
A6NM28	416	0.233173	0.0697115	0.206731	0.21875	0.0721154	0.0649038	0.0961538	0.0384615	216.616	43.2022	474.404	-0.113341	3.26385	26.4423	0	0	0	110	0	0	0	2	0	0	0	6	3	0	0	0	1	1	0.122302	0.244604	0.321343	0	7	0	2	0	0	0	0	47	3	1	0	0
A6NM36	301	0.348837	0.0564784	0.215947	0.162791	0.0830565	0.0531561	0.0498339	0.0299003	219.926	33.1296	464.97	0.260565	3.4896	0	0	0	0	0	0	0	0	0	0	0	0	0	0	0	0	0	0	0	0.0397351	0.109272	0.423841	0	2	0	0	0	0	0	0	47	0	1	0	0
A6NM43	557	0.385996	0.0466786	0.186715	0.109515	0.102334	0.070018	0.0771993	0.021544	208.805	33.539	490.756	0.0286894	3.1025	0	0	0	0	0	0	0	0	0	0	0	0	3	2	0	0	0	0	0	0.0842294	0.195341	0.46595	0	16	0	0	0	0	0	0	80	0	0	0	0
A6NM45	220	0.390909	0.104545	0.181818	0.0727273	0.0909091	0.0363636	0.0909091	0.0318182	209.218	33.4114	468.191	0.306545	3.36823	0	0	0	0	0	0	0	0	0	0	0	0	0	0	4	0.420814	0.99095	0	0	0.280543	0.552036	0.475113	0	1	0	0	0	0	0	0	15	0	1	0	0
A6NM62	1247	0.25822	0.0569366	0.303128	0.156375	0.117883	0.0521251	0.0352847	0.0200481	218.186	29.8602	462.211	0.0699118	3.39488	24.6191	0	0	0	307	0	0	0	5	0	0	0	27	16	1	0.0168269	0.998397	1	1	0.0224359	0.0689103	0.268429	0	24	0	5	0	0	0	0	164	4	2	1	0
A6NM66	108	0.222222	0.0462963	0.277778	0.157407	0.0740741	0.0833333	0.0740741	0.0648148	209.816	38.3157	459.454	0.101574	3.0937	0	0	0	0	0	0	0	0	0	0	0	0	0	0	0	0	0	0	0	0.155963	0.302752	0	0	4	0	0	0	0	0	0	15	1	0	0	0
A6NM76	312	0.375	0.121795	0.259615	0.099359	0.0512821	0.0320513	0.0288462	0.0320513	214.771	29.6968	460.647	0.416923	3.49933	0	0	0	0	0	0	0	0	0	0	0	0	0	0	7	0.501597	0.99361	0	0	0.0511182	0.265176	0.485623	0	0	0	1	0	0	0	0	42	1	0	0	0
A6NMA1	111	0.396396	0.036036	0.153153	0.036036	0.27027	0.0630631	0.036036	0.00900901	209.03	23.6009	460.946	0.0209009	3.24261	28.8288	0	0	0	32	0	0	0	1	0	0	0	1	1	0	0	0	0	0	0.205357	0.348214	0.955357	0	2	0	0	0	0	0	0	12	1	1	0	0
A6NMB1	481	0.31185	0.0706861	0.232848	0.133056	0.0831601	0.0706861	0.0686071	0.029106	213.629	38.8468	474.256	0.014262	3.28613	0	0	0	0	0	0	0	0	0	0	0	0	2	0	1	0.0477178	0.995851	4	2	0.0435685	0.114108	0.093361	1	26	1	0	0	0	0	0	6	1	1	0	0
A6NMB9	653	0.323124	0.0719755	0.130168	0.093415	0.085758	0.139357	0.139357	0.0168453	198.116	39.0956	509.72	-0.0690199	2.81329	30.3216	0	0	0	198	0	0	0	5	0	0	0	11	7	0	0	0	0	0	0.348624	0.730887	0.902141	0	16	0	6	0	0	0	0	108	1	0	0	0
A6NMD0	228	0.324561	0.0921053	0.179825	0.100877	0.0964912	0.114035	0.0570175	0.0350877	207.121	33.5333	476.447	0.0496053	3.16386	17.9825	0	0	0	41	0	0	0	1	0	0	0	3	3	2	0.183406	0.991266	0	0	0.0960699	0.248908	0.515284	0	5	0	0	0	0	0	0	3	2	0	0	2
A6NMD2	632	0.265823	0.0332278	0.231013	0.199367	0.151899	0.0506329	0.0537975	0.0142405	221.554	32.3144	467.337	-0.166155	3.42146	40.5063	17.4051	0	0	256	110	0	0	6	4	0	0	14	9	0	0	0	0	0	0.176935	0.511848	0.682464	0	1	0	5	0	0	0	0	55	0	0	0	2
A6NMK7	179	0.217877	0.134078	0.122905	0.195531	0.106145	0.0558659	0.0837989	0.0837989	220.042	30.2034	435.933	0.0139106	3.61726	0	0	0	0	0	0	0	0	0	0	0	0	0	0	0	0	0	0	0	0	0	0	0	2	7	2	0	0	0	0	20	0	0	0	1
A6NMK8	535	0.242991	0.0411215	0.293458	0.160748	0.119626	0.0803738	0.0411215	0.0205607	215.683	34.1024	468.824	-0.0685234	3.25323	53.271	9.71963	0	0	285	52	0	0	3	1	0	0	14	8	0	0	0	0	0	0.108209	0.188433	0.453358	0	6	0	1	0	0	0	0	81	2	1	0	0
A6NML5	194	0.371134	0.154639	0.185567	0.0670103	0.0360825	0.0721649	0.0773196	0.0360825	206.753	33.4727	465.99	0.376495	3.38186	0	0	0	0	0	0	0	0	0	0	0	0	0	0	4	0.430769	0.989744	0	0	0.0769231	0.158974	0	0	0	0	0	0	0	0	0	18	3	1	0	2
A6NMN3	283	0.212014	0.0812721	0.257951	0.113074	0.166078	0.0636042	0.0530035	0.0530035	213.735	34.959	441.237	-0.131413	3.35145	21.2014	0	0	0	60	0	0	0	2	0	0	0	4	2	0	0	0	0	0	0.140845	0.169014	0.274648	0	12	0	0	0	0	0	0	28	4	0	0	0
A6NMS3	321	0.401869	0.127726	0.183801	0.105919	0.0654206	0.0342679	0.0342679	0.046729	216.315	28.3981	445.502	0.435545	3.60265	0	0	0	0	0	0	0	0	0	0	0	0	0	0	7	0.475155	0.993789	0	0	0	0	0	0	0	0	0	0	0	0	0	30	1	1	0	0
A6NMS7	1700	0.26	0.0523529	0.288235	0.118235	0.124706	0.103529	0.0405882	0.0123529	212.498	30.9523	460.352	0.0480824	3.2798	56.2353	0	0	0	956	0	0	0	7	0	0	0	25	22	1	0.0141093	0.998824	0	0	0.0970018	0.387419	0.577895	1	13	0	7	0	0	0	0	21	0	0	0	5
A6NMT0	343	0.230321	0.0758017	0.239067	0.139942	0.0991254	0.134111	0.0787172	0.00291545	209.244	39.3802	477.481	0.0197668	3.19134	44.0233	0	0	0	151	0	0	0	2	0	0	0	8	6	0	0	0	0	0	0.229651	0.430233	0.773256	0	10	0	5	0	0	0	0	58	6	0	0	0
A6NMU1	304	0.417763	0.154605	0.151316	0.0888158	0.0493421	0.0592105	0.0460526	0.0328947	215.409	30.8727	442.562	0.459145	3.69526	0	0	0	0	0	0	0	0	0	0	0	0	0	0	7	0.501639	0.993443	0	0	0.0459016	0.0983607	0.357377	0	0	0	0	0	0	0	0	35	0	1	0	0
A6NMX2	242	0.301653	0.0785124	0.18595	0.173554	0.14876	0.0289256	0.0702479	0.0123967	219.325	35.1339	472.624	-0.0481405	3.49438	8.67769	2.06612	0	0	21	5	0	0	1	0	0	0	1	1	0	0	0	0	0	0.0823045	0.205761	0.222222	0	8	0	3	0	0	0	0	27	2	0	0	2
A6NMY6	339	0.309735	0.079646	0.20354	0.165192	0.156342	0.020649	0.0560472	0.00884956	220.247	28.051	472.053	-0.0186431	3.48912	0	0	0	0	0	0	0	0	0	0	0	0	1	0	0	0	0	0	0	0	0.0382353	0	0	5	0	5	21	0	0	0	67	2	1	2	0
A6NMZ2	147	0.319728	0.0408163	0.238095	0.170068	0.136054	0.0408163	0.0340136	0.0204082	219.052	28.1633	469.864	0.102993	3.36973	0	0	0	0	0	0	0	0	0	0	0	0	3	1	0	0	0	0	0	0	0	0	0	0	0	0	0	0	2	0	21	2	1	1	2
A6NMZ5	311	0.382637	0.14791	0.205788	0.0868167	0.0514469	0.0514469	0.0418006	0.0321543	212.343	28.683	444.511	0.491158	3.5754	0	0	0	0	0	0	0	0	0	0	0	0	0	0	7	0.503205	0.99359	0	0	0.0192308	0	0.259615	0	0	0	0	0	0	0	0	22	0	2	0	0
A6NMZ7	2263	0.2943	0.0715864	0.20327	0.141847	0.126823	0.0477243	0.101635	0.0128148	211.54	33.4065	479.892	-0.0157048	3.2098	4.63986	0.927972	0.220946	0	105	21	5	0	1	1	0	0	8	7	0	0	0	9	1	0.0441696	0.162102	0.147527	1	41	0	18	1	0	0	0	276	1	0	0	2
A6NN06	94	0.191489	0.0425532	0.202128	0.244681	0.0638298	0.138298	0.0851064	0.0319149	222.176	54.5936	450.787	-0.125638	3.41064	70.2128	0	0	0	66	0	0	0	1	0	0	0	3	3	0	0	0	0	0	0.115789	0.505263	0.863158	0	1	0	0	0	0	0	0	8	4	0	0	0
A6NN14	1252	0.184505	0.0894569	0.17492	0.290735	0.101438	0.034345	0.0559105	0.0686901	227.202	29.306	447.798	-0.0618131	3.61964	0	0	0	0	0	0	0	0	0	0	0	0	0	0	0	0	0	1	1	0.0119713	0.0359138	0	0	12	0	14	38	0	0	0	72	0	0	0	1
A6NN73	597	0.252931	0.040201	0.217755	0.19933	0.149079	0.0586265	0.0686767	0.0134003	219.739	33.7784	474.921	-0.213551	3.36213	45.2261	19.263	0	0	270	115	0	0	4	2	0	0	14	11	0	0	0	0	0	0.249164	0.591973	0.817726	0	1	0	0	0	0	0	0	56	1	1	0	0
A6NN90	582	0.293814	0.0549828	0.195876	0.123711	0.128866	0.108247	0.0824742	0.0120275	209.569	40.1251	476.998	-0.0829725	3.17235	35.7388	0	0	0	208	0	0	0	5	0	0	0	12	5	0	0	0	0	0	0.0823328	0.216123	0.665523	0	17	0	0	0	0	0	0	85	1	1	0	5
A6NN92	205	0.385366	0.165854	0.170732	0.097561	0.0585366	0.0439024	0.0439024	0.0341463	217.138	31.7478	442.79	0.391122	3.72946	0	0	0	0	0	0	0	0	0	0	0	0	0	0	4	0.407767	0.990291	0	0	0.0873786	0.262136	0	0	0	0	0	0	0	0	0	26	0	0	0	0
A6NNA2	597	0.140704	0.0251256	0.231156	0.281407	0.0938023	0.112228	0.103853	0.0117253	219.475	52.095	484.653	-0.307688	3.17347	94.8074	0	0	0	566	0	0	0	3	0	0	0	11	11	0	0	0	0	0	0.668896	0.729097	0.859532	0	0	0	21	0	0	0	0	81	7	1	0	2
A6NNA5	263	0.254753	0.0684411	0.258555	0.13308	0.0988593	0.0988593	0.0646388	0.0228137	210.413	36.7384	472.551	-0.0465779	3.17688	38.403	0	0	0	101	0	0	0	2	0	0	0	6	5	0	0	0	0	0	0.0454545	0.17803	0.17803	0	12	0	2	0	0	0	0	36	2	0	0	0
A6NNB3	132	0.386364	0.0984848	0.143939	0.136364	0.0909091	0.0681818	0.0530303	0.0227273	209.721	35.5553	487.629	0.122197	3.25174	0	0	0	0	0	0	0	0	0	0	0	0	0	0	2	0.345865	0.984962	0	0	0.150376	0.556391	0	0	2	0	0	0	0	0	0	2	2	1	1	0
A6NNC1	897	0.255295	0.0345596	0.298774	0.148272	0.0746934	0.103679	0.0691193	0.0156076	207.018	42.7939	492.472	-0.0664771	2.92107	91.1929	0	0	0	818	0	0	0	4	0	0	0	24	21	1	0.0200445	0.997773	0	0	0.157016	0.432071	0.91314	0	2	0	9	0	0	0	0	100	1	2	0	0
A6NND4	320	0.440625	0.121875	0.2	0.06875	0.053125	0.05625	0.028125	0.03125	209.412	30.8287	462.384	0.410125	3.40856	0	0	0	0	0	0	0	0	0	0	0	0	0	0	7	0.464174	0.993769	0	0	0.196262	0.423676	0.619938	0	1	0	0	0	0	0	0	26	1	1	0	0
A6NNE9	402	0.278607	0.0696517	0.181592	0.126866	0.104478	0.106965	0.0945274	0.0373134	209.576	39.248	462.443	-0.0418905	3.19965	40.0498	0	0	0	161	0	0	0	1	0	0	0	2	2	2	0.1067	0.995037	0	0	0.233251	0.389578	0.389578	0	6	0	1	0	0	0	0	75	1	0	0	1
A6NNF4	738	0.172087	0.098916	0.210027	0.247967	0.109756	0.0352304	0.0609756	0.0650407	224.511	28.9577	444.276	-0.0148238	3.59957	0	0	0	0	0	0	0	0	0	0	0	0	0	0	0	0	0	1	1	0	0	0.166441	0	10	0	11	27	0	4	0	54	2	2	0	4
A6NNF7	802	0.276808	0.0785536	0.21197	0.140898	0.0723192	0.0897756	0.0922693	0.0374065	210.542	41.6094	465.208	0.0634289	3.24136	12.5935	0	0	0	101	0	0	0	3	0	0	0	5	2	2	0.0523039	0.997509	0	0	0.0797011	0.225405	0.427148	0	32	0	0	0	0	0	0	62	0	0	0	0
A6NNH2	459	0.22658	0.0326797	0.278867	0.159041	0.08061	0.143791	0.0610022	0.0174292	211.836	38.0865	466.532	-0.102244	3.132	98.2571	0	0	0	451	0	0	0	2	0	0	0	8	8	0	0	0	0	0	0.0565217	0.391304	0.767391	0	0	0	0	0	0	0	0	64	5	0	0	0
A6NNJ1	464	0.260776	0.0280172	0.221983	0.172414	0.0905172	0.135776	0.0689655	0.0215517	211.292	39.6084	478.515	-0.128707	3.08679	81.8966	0	0	0	380	0	0	0	3	0	0	0	11	10	0	0	0	0	0	0.0989247	0.350538	0.711828	0	0	0	2	0	0	0	0	53	6	0	0	0
A6NNL0	878	0.271071	0.0523918	0.210706	0.118451	0.094533	0.138952	0.0888383	0.0250569	207.352	37.1144	475.395	-0.0333941	3.09123	51.2528	0	0	0	450	0	0	0	6	0	0	0	16	14	0	0	0	0	0	0.114903	0.393629	0.746303	0	19	0	5	0	0	3	0	160	4	0	0	2
A6NNL5	157	0.318471	0.133758	0.184713	0.165605	0.0573248	0.0636943	0.0509554	0.0254777	217.785	40.6127	453.204	0.12465	3.62446	0	0	0	0	0	0	0	0	0	0	0	0	0	0	0	0	0	0	0	0.101266	0.291139	0.291139	0	5	1	0	0	0	0	0	27	0	0	0	1
A6NNM3	1639	0.283099	0.0500305	0.215375	0.14399	0.128127	0.0793167	0.0744356	0.0256254	214.048	37.655	471.636	-0.109963	3.25207	19.036	14.6431	0	0	312	240	0	0	5	6	0	0	20	18	0	0	0	5	2	0.139634	0.414024	0.503049	0	46	0	12	11	0	0	0	190	1	0	0	0
A6NNM8	815	0.276074	0.0723926	0.211043	0.179141	0.122699	0.0564417	0.0527607	0.0294479	221.726	34.1387	453.053	0.00157055	3.53882	4.29448	0.981595	0	0	35	8	0	0	1	0	0	0	8	6	0	0	0	1	1	0.0563725	0.0502451	0.231618	0	26	0	2	0	0	0	0	107	1	0	0	3
A6NNN8	435	0.425287	0.112644	0.172414	0.0597701	0.0482759	0.062069	0.0850575	0.0344828	204.801	35.3717	481.407	0.284805	3.21009	0	0	0	0	0	0	0	0	0	0	0	0	0	0	11	0.545872	0.995413	0	0	0.0917431	0.28211	0.245413	0	8	0	0	0	0	0	0	48	1	0	0	2
A6NNP5	214	0.261682	0.0560748	0.252336	0.21028	0.154206	0.0327103	0.0327103	0	229.434	27.2182	464.061	-0.0745794	3.71327	28.5047	52.3364	0	0	61	112	0	0	1	2	0	0	4	1	0	0	0	0	0	0.0651163	0.176744	0.353488	0	1	0	7	0	0	0	0	31	0	1	0	1
A6NNS2	312	0.375	0.102564	0.160256	0.13141	0.099359	0.0480769	0.0608974	0.0224359	214.665	31.3625	472.147	0.0929487	3.43327	0	0	0	0	0	0	0	0	0	0	0	0	0	0	0	0	0	0	0	0.0638978	0	0.220447	1	2	0	0	0	0	0	0	48	0	0	0	1
A6NNT2	1141	0.337423	0.0446976	0.188431	0.141981	0.126205	0.0920245	0.0587204	0.0105171	213.09	33.2885	476.128	-0.0331989	3.24862	26.8186	10.4294	0	0	306	119	0	0	3	3	0	0	15	13	0	0	0	0	0	0.174256	0.374781	0.488616	0	18	0	3	2	0	0	0	154	3	0	0	0
A6NNV3	312	0.272436	0.11859	0.137821	0.192308	0.157051	0.0737179	0.025641	0.0224359	225.718	35.9385	434.628	-0.0347436	3.87772	0	0	0	0	0	0	0	0	0	0	0	0	2	2	0	0	0	0	0	0.111821	0.223642	0.440895	0	13	0	1	0	0	0	0	63	1	0	0	5
A6NNW6	628	0.326433	0.0509554	0.211783	0.128981	0.125796	0.066879	0.0684713	0.0207006	212.709	28.2406	474.064	0.079379	3.24225	8.12102	0	0	0	51	0	0	0	1	0	0	0	5	2	0	0	0	0	0	0.111288	0.383148	0.667727	0	10	0	3	0	0	0	0	113	1	1	0	1
A6NNX1	92	0.326087	0.0978261	0.152174	0.195652	0.130435	0.0652174	0.0326087	0	225.437	32.5554	455.38	0.105761	3.7637	0	0	0	0	0	0	0	0	0	0	0	0	0	0	0	0	0	1	1	0	0	0	0	2	0	0	0	0	0	0	12	0	0	1	1
A6NNZ2	444	0.295045	0.0923423	0.220721	0.105856	0.141892	0.045045	0.0743243	0.0247748	209.874	32.5011	452.381	0.0395721	3.30453	0	8.55856	0	0	0	38	0	0	0	1	0	0	2	0	0	0	0	0	0	0.0921348	0.0988764	0.103371	0	12	0	0	0	0	0	0	68	2	2	3	0
A6NP11	495	0.169697	0.0868687	0.240404	0.240404	0.10303	0.030303	0.0646465	0.0646465	224.119	30.3285	448.174	-0.0291313	3.53497	0	0	0	0	0	0	0	0	0	0	0	0	0	0	0	0	0	1	1	0	0	0	0	15	0	13	3	0	0	0	48	2	3	0	0
A6NP61	321	0.205607	0.0778816	0.205607	0.17134	0.0965732	0.109034	0.0747664	0.05919	217.477	35.9246	452.43	-0.139221	3.36717	32.7103	0	0	0	105	0	0	0	1	0	0	0	5	3	0	0	0	0	0	0.0403727	0.161491	0.431677	0	4	0	4	0	0	0	0	35	2	0	1	0
A6NNY8	438	0.257991	0.0821918	0.242009	0.157534	0.111872	0.0479452	0.0570776	0.043379	216.347	32.1861	445.311	0.0899315	3.42733	0	0	0	0	0	0	0	0	0	0	0	0	1	0	0	0	0	1	1	0	0	0	0	13	2	0	2	1	0	0	61	2	2	1	0
A6PVC2	850	0.3	0.0705882	0.198824	0.150588	0.115294	0.0741176	0.06	0.0305882	215.214	35.2689	465.346	-0.0364588	3.34066	14.2353	0	0	0	121	0	0	0	2	0	0	0	6	4	0	0	0	1	1	0.0505288	0.249119	0.383079	0	18	0	2	0	0	0	0	118	0	0	0	1
A6PVI3	153	0.20915	0.111111	0.202614	0.176471	0.150327	0.00653595	0.0980392	0.0457516	219.696	34.2654	447.686	0.00666667	3.53895	0	0	0	0	0	0	0	0	0	0	0	0	0	0	0	0	0	1	1	0	0.227273	0	0	2	0	2	0	0	0	0	12	0	1	0	0
A6PVL3	124	0.387097	0.0403226	0.169355	0.137097	0.0725806	0.0483871	0.129032	0.016129	206.032	39.5073	508.637	0.133629	2.92435	0	0	0	0	0	0	0	0	0	0	0	0	0	0	2	0.352	0.984	0	0	0.264	0.36	0.728	0	4	0	1	0	0	0	0	10	3	1	0	0
A6PVS8	624	0.294872	0.0929487	0.197115	0.224359	0.112179	0.0320513	0.0288462	0.0176282	228.535	28.1152	453.524	0.0764744	3.78962	0	0	0	0	0	0	0	0	0	0	0	0	1	0	0	0	0	2	2	0.0288	0.1936	0.2448	0	4	1	2	0	0	0	0	83	0	1	0	3
A6PVY3	158	0.21519	0.107595	0.246835	0.132911	0.177215	0.0443038	0.0632911	0.0126582	216.446	29.5063	458.703	-0.0770886	3.48772	0	13.2911	0	0	0	21	0	0	0	1	0	0	4	1	0	0	0	0	0	0.0943396	0.0943396	0	0	3	0	0	0	0	0	0	28	0	0	0	2
A6QL63	1104	0.338768	0.0652174	0.195652	0.136775	0.108696	0.0570652	0.0697464	0.0280797	211.238	34.5538	472.959	0.0536141	3.22911	3.80435	0	0	0	42	0	0	0	1	0	0	0	4	3	0	0	0	1	1	0.0850679	0.149321	0.168326	0	31	0	12	4	1	0	0	144	1	0	0	2
A6QL64	1941	0.266358	0.0340031	0.260175	0.189078	0.157135	0.0350335	0.0417311	0.0164863	221.308	27.8529	480.725	-0.121144	3.34572	42.0917	16.7955	0	0	817	326	0	0	6	7	0	0	37	24	0	0	0	0	0	0.0278064	0.134398	0.592688	0	12	0	19	2	0	0	0	224	2	1	0	2
A6XGL0	299	0.344482	0.0668896	0.167224	0.123746	0.120401	0.0735786	0.0769231	0.0267559	211.334	38.3431	483.278	-0.0392642	3.21324	0	0	0	0	0	0	0	0	0	0	0	0	1	1	0	0	0	1	1	0.08	0	0	0	10	0	4	0	0	0	0	51	2	1	0	1
A7E2F4	631	0.263074	0.0237718	0.229794	0.172742	0.164818	0.0522979	0.0729002	0.0206022	217.885	33.5377	479.303	-0.192456	3.26079	38.1933	17.7496	0	0	241	112	0	0	6	4	0	0	13	9	0	0	0	0	0	0.189873	0.436709	0.778481	0	4	0	2	0	0	0	0	51	0	0	0	0
A7E2S9	258	0.333333	0.0426357	0.22093	0.158915	0.131783	0.0426357	0.0465116	0.0232558	216.348	29.893	476.562	-0.0587209	3.27252	16.6667	0	0	0	43	0	0	0	1	0	0	0	2	2	0	0	0	0	0	0	0.127413	0	0	2	0	0	0	0	0	0	38	0	1	0	0
A7E2U8	309	0.220065	0.113269	0.197411	0.184466	0.100324	0.0873786	0.0938511	0.00323625	212.883	30.8573	475.23	-0.0033657	3.34472	11.9741	0	0	0	37	0	0	0	1	0	0	0	6	4	0	0	0	0	0	0.0225806	0.196774	0	0	8	0	5	2	0	2	0	54	3	0	1	3
A7E2V4	1837	0.290691	0.066957	0.212847	0.126293	0.103974	0.0898204	0.0887316	0.0206859	206.868	37.7557	479.878	-0.00647795	3.09445	27.8715	0	0	0	512	0	0	0	3	0	0	0	23	18	0	0	0	0	0	0.145811	0.375408	0.464635	0	41	7	31	10	5	0	0	244	2	2	0	9
A7E2Y1	1983	0.33182	0.0494201	0.186082	0.179022	0.177005	0.0196672	0.0458901	0.0110943	222.004	31.649	480.428	-0.12769	3.46449	0.252143	41.0993	0	0	5	815	0	0	0	7	0	0	21	13	0	0	0	3	3	0.167843	0.451613	0.589718	0	22	1	18	3	0	5	0	194	0	2	0	6
A7KAX9	2087	0.260182	0.0670819	0.252516	0.143268	0.118831	0.0910398	0.0527072	0.0143747	211.637	34.1471	463.308	-0.0343795	3.25418	38.8117	0	0	0	810	0	0	0	6	0	0	0	42	33	0	0	0	3	3	0.0809387	0.221264	0.362069	0	14	1	107	1	2	1	0	332	1	0	0	2
A7MBM2	1401	0.321199	0.0856531	0.213419	0.108494	0.0778016	0.0885082	0.0756602	0.0292648	208.105	38.5732	477.557	0.122291	3.19756	22.7695	0	0	0	319	0	0	0	6	0	0	0	8	7	12	0.180456	0.998573	1	1	0.191155	0.42796	0.549215	0	25	0	19	0	0	0	0	197	1	0	0	0
A7MCY6	615	0.266667	0.0520325	0.209756	0.130081	0.130081	0.120325	0.0650407	0.0260163	212.409	37.6844	465.496	-0.0865041	3.23733	28.7805	28.6179	0	0	177	176	0	0	1	3	0	0	6	4	0	0	0	0	0	0.297078	0.506494	0.715909	0	6	1	22	5	0	0	0	109	1	0	0	2
A7MD48	611	0.10802	0.0441899	0.368249	0.271686	0.0671031	0.0801964	0.0474632	0.0130933	224.461	48.9519	481.478	-0.194501	3.33309	95.4173	0	0	0	583	0	0	0	1	0	0	0	13	13	0	0	0	0	0	0.511438	0.702614	0.843137	0	1	0	37	0	0	0	0	82	4	1	1	1
A7XYQ1	873	0.271478	0.0400916	0.19244	0.126002	0.0962199	0.166094	0.0824742	0.0252005	205.795	34.8781	465.558	-0.0128637	3.03011	57.3883	0	0	0	501	0	0	0	5	0	0	0	16	15	0	0	0	0	0	0.217391	0.488558	0.586957	0	10	0	6	0	0	0	0	145	1	0	0	1
A8CG34	1229	0.251424	0.0626526	0.318959	0.0968267	0.0447518	0.135069	0.0846216	0.00569569	199.101	40.7658	503.46	0.0596013	2.78233	55.8177	0	0	0	686	0	0	0	8	0	0	0	29	19	2	0.0325203	0.998374	0	0	0.363415	0.845528	0.956911	0	13	1	73	9	3	0	0	195	3	2	0	2
A8K010	186	0.252688	0.0806452	0.236559	0.182796	0.0698925	0.0645161	0.0430108	0.0698925	221.214	43.2559	450.618	0.0113978	3.45801	29.0323	0	0	0	54	0	0	0	1	0	0	0	1	1	2	0.171123	0.989305	0	0	0.0641711	0.203209	0.550802	0	4	0	0	0	0	0	0	15	1	2	0	0
A8K0H0	122	0.565574	0.0327869	0.213115	0.0491803	0.00819672	0.0163934	0.114754	0	190.697	38.9918	553.492	0.145246	2.43393	0	0	0	0	0	0	0	0	0	0	0	0	0	0	3	0.520325	0.98374	0	0	0.626016	0.95122	0.95122	0	3	0	0	0	0	0	0	7	2	0	0	0
A8K0R7	811	0.284834	0.0406905	0.228113	0.139334	0.125771	0.0776819	0.0789149	0.0246609	211.061	35.8436	485.055	-0.0650308	3.10855	25.524	0	0	0	207	0	0	0	3	0	0	0	17	11	0	0	0	0	0	0.0640394	0.284483	0.655172	0	20	0	9	2	0	0	0	99	0	0	0	7
A8K0S8	358	0.26257	0.075419	0.192737	0.117318	0.142458	0.0977654	0.0977654	0.0139665	207.922	35.7693	463.707	-0.0234916	3.195	26.257	0	0	0	94	0	0	0	2	0	0	0	6	6	0	0	0	0	0	0.086351	0.256267	0.32312	0	11	0	0	0	0	0	0	47	0	0	0	0
A8K0Z3	465	0.292473	0.0516129	0.210753	0.122581	0.126882	0.113978	0.0795699	0.00215054	209.596	33.8477	479.31	-0.0862366	3.15512	36.7742	8.60215	0	0	171	40	0	0	2	1	0	0	9	6	0	0	0	1	1	0.218884	0.439914	0.512876	0	2	0	10	4	0	0	0	76	1	0	0	0
A8K2U0	1454	0.306052	0.100413	0.251032	0.0990371	0.1011	0.0584594	0.0667125	0.0171939	210.507	30.0853	468.685	0.106878	3.31577	0	0	0	0	0	0	0	0	0	0	0	0	0	0	0	0	0	0	0	0.0199313	0.0646048	0.138144	1	48	20	5	0	0	3	0	225	0	0	0	4
A8K4G0	201	0.298507	0.0845771	0.21393	0.129353	0.114428	0.0597015	0.0746269	0.0248756	215.573	33.7289	456.667	0.0668159	3.4397	0	0	0	0	0	0	0	0	0	0	0	0	0	0	1	0.108911	0.990099	1	1	0.10396	0	0	1	12	0	2	0	0	0	0	16	0	0	0	1
A8K554	130	0.230769	0.0769231	0.253846	0.184615	0.153846	0.0384615	0.0307692	0.0307692	224.436	32.5154	428.162	-0.018	3.70862	0	0	0	0	0	0	0	0	0	0	0	0	1	0	0	0	0	0	0	0	0	0	0	4	0	0	0	0	0	0	16	1	1	0	0
A8K5M9	175	0.251429	0.08	0.24	0.142857	0.114286	0.108571	0.0514286	0.0114286	215.617	39.9486	467.754	0.0448	3.40343	17.1429	0	0	0	30	0	0	0	1	0	0	0	2	2	0	0	0	0	0	0.25	0.431818	0.323864	0	3	0	4	0	0	0	0	30	1	0	0	0
A8K7I4	914	0.300875	0.0754923	0.266958	0.109409	0.103939	0.0536105	0.0754923	0.0142232	211.152	30.8546	473.136	0.0825274	3.2374	0	0	0	0	0	0	0	0	0	0	0	0	2	0	0	0	0	1	1	0.031694	0.101639	0.0885246	1	43	0	11	0	0	0	0	155	0	0	0	0
A8K830	154	0.207792	0.12987	0.318182	0.0584416	0.11039	0.0974026	0.0194805	0.0584416	201.519	30.1214	447.136	0.0902597	3.11727	0	0	0	0	0	0	0	0	0	0	0	0	0	0	0	0	0	0	0	0.219355	0.541935	0.890323	0	5	0	0	0	0	0	0	26	0	0	0	2
A8K855	629	0.27663	0.0890302	0.233704	0.144674	0.138315	0.0413355	0.0461049	0.0302067	218.675	27.4967	454.841	0.0980445	3.51024	4.92846	0	0	0	31	0	0	0	1	0	0	0	1	1	0	0	0	3	1	0	0.047619	0.0793651	0	10	6	5	15	0	0	0	104	0	0	1	0
A8K8P3	1242	0.311594	0.0950081	0.206924	0.222222	0.078905	0.0346216	0.031401	0.0193237	228.135	42.1596	443.477	-0.0427536	3.81716	12.8824	4.26731	0	0	160	53	0	0	2	2	0	0	8	6	0	0	0	0	0	0.104586	0.365245	0.506034	0	22	1	7	7	0	0	0	154	0	0	0	10
A8K8V0	405	0.209877	0.0987654	0.162963	0.202469	0.106173	0.0987654	0.0716049	0.0493827	218.364	42.963	443.709	-0.134494	3.48405	9.87654	0	0	0	40	0	0	0	1	0	0	0	3	3	0	0	0	1	1	0.0369458	0.167488	0	0	13	65	4	0	0	0	0	63	0	0	0	2
A8K979	691	0.267728	0.065123	0.276411	0.154848	0.0955137	0.0622287	0.0477569	0.0303907	216.914	30.3656	460.347	0.0868741	3.37559	0	0	0	0	0	0	0	0	0	0	0	0	6	4	0	0	0	1	1	0.0216763	0.143064	0.106936	0	21	2	7	1	0	0	0	103	8	1	0	1
A8KAH6	182	0.302198	0.0769231	0.142857	0.142857	0.164835	0.0934066	0.0714286	0.00549451	211.897	40.3648	470.934	-0.110879	3.30736	0	0	0	0	0	0	0	0	0	0	0	0	3	1	0	0	0	1	1	0.0928962	0.218579	0	0	9	0	0	0	0	0	0	31	0	1	1	1
A8MPP1	907	0.327453	0.0639471	0.199559	0.15215	0.127894	0.0441014	0.061742	0.0231533	217.57	33.4492	470.152	-0.0438037	3.39305	0	6.83572	0	0	0	62	0	0	0	1	0	0	6	2	0	0	0	1	1	0.0969163	0.180617	0.209251	0	17	10	7	23	0	0	0	90	3	0	0	0
A8MPS7	323	0.346749	0.0588235	0.136223	0.133127	0.117647	0.0712074	0.105263	0.0309598	207.558	42.6334	488.452	-0.0666873	3.06811	0	0	0	0	0	0	0	0	0	0	0	0	2	0	0	0	0	0	0	0	0.095679	0.358025	0	18	3	7	1	0	0	0	43	2	1	0	0
A8MPX8	630	0.27619	0.0920635	0.253968	0.15873	0.107937	0.0412698	0.047619	0.0222222	217.982	30.4289	459.152	0.0857302	3.48162	5.07937	0	0	0	32	0	0	0	1	0	0	0	6	3	0	0	0	1	1	0.044374	0.0285261	0	0	20	0	0	0	0	0	0	82	1	1	1	0
A8MPY1	467	0.319058	0.132762	0.237687	0.134904	0.0985011	0.0299786	0.0321199	0.0149893	216.991	32.997	440.206	0.228844	3.6497	0	0	0	0	0	0	0	0	0	0	0	0	0	0	4	0.183761	0.995726	0	0	0.025641	0	0	1	7	0	1	0	0	2	0	28	0	0	1	0
A8MQ03	144	0.229167	0.0347222	0.222222	0.111111	0.0625	0.145833	0.0763889	0.118056	205.708	33.8507	427.493	-0.0899306	2.96188	21.5278	0	0	0	31	0	0	0	1	0	0	0	1	1	0	0	0	0	0	0.17931	0.544828	0.772414	0	1	0	7	0	0	0	0	11	1	1	0	1
A8MQ11	134	0.238806	0.0746269	0.223881	0.216418	0.0597015	0.0970149	0.0522388	0.0373134	221.876	39.8485	452.396	-0.0103731	3.49172	0	0	0	0	0	0	0	0	0	0	0	0	1	0	0	0	0	0	0	0	0	0	0	5	0	0	0	0	0	0	28	5	2	0	0
A8MQ14	1090	0.158716	0.087156	0.227523	0.234862	0.106422	0.0366972	0.0807339	0.0678899	222.306	33.928	435.763	-0.0598532	3.51602	0	0	0	0	0	0	0	0	0	0	0	0	1	0	0	0	0	1	1	0	0	0	0	39	0	23	3	0	4	0	85	2	0	1	2
A8MQ27	555	0.311712	0.0630631	0.174775	0.12973	0.0936937	0.104505	0.0882883	0.0342342	208.413	41.2106	482.515	-0.0485045	3.08279	0	0	0	0	0	0	0	0	0	0	0	0	5	2	0	0	0	2	1	0.181655	0.280576	0.532374	0	13	0	7	0	0	0	0	71	0	0	0	0
A8MQB3	221	0.248869	0.0452489	0.21267	0.180995	0.081448	0.131222	0.0542986	0.0452489	215.7	41.557	462.131	-0.0228507	3.26588	0	0	0	0	0	0	0	0	0	0	0	0	5	3	0	0	0	0	0	0.0765766	0.445946	0.837838	0	3	0	0	0	0	0	0	31	3	0	0	0
A8MQT2	603	0.266998	0.0281924	0.228856	0.182421	0.160862	0.0431177	0.0696517	0.0199005	218.799	33.2731	479.894	-0.203615	3.29036	35.4892	18.5738	0	0	214	112	0	0	5	4	0	0	11	9	0	0	0	0	0	0.208609	0.480132	0.793046	0	4	0	1	0	0	0	0	49	0	0	0	1
A8MRT5	1133	0.259488	0.0308914	0.218888	0.188879	0.0926743	0.162401	0.0308914	0.015887	218.167	39.0831	449.021	0.00999117	3.37885	58.2524	0	0	0	660	0	0	0	4	0	0	0	16	10	1	0.021164	0.998236	0	0	0.145503	0.262787	0.84127	0	3	0	12	0	0	0	0	221	3	0	0	0
A8MSI8	78	0.294872	0.0769231	0.192308	0.217949	0.102564	0.0641026	0.025641	0.025641	230.852	33.6372	423.564	-0.0624359	3.86218	0	0	0	0	0	0	0	0	0	0	0	0	0	0	0	0	0	0	0	0.177215	0.227848	0	0	3	0	0	0	0	0	0	10	0	0	0	3
A8MSY1	372	0.33871	0.0887097	0.163978	0.150538	0.112903	0.0537634	0.077957	0.0134409	215.649	34.1347	475.212	0.0442204	3.4211	23.6559	0	0	0	88	0	0	0	1	0	0	0	2	2	5	0.273458	0.994638	0	0	0.0723861	0.13941	0.19571	0	2	0	0	0	0	0	0	34	0	4	0	1
A8MT19	583	0.334477	0.0891938	0.2247	0.137221	0.114923	0.0394511	0.0445969	0.0154374	215.694	29.8322	464.244	0.106947	3.45389	0	0	0	0	0	0	0	0	0	0	0	0	0	0	0	0	0	2	2	0.0239726	0	0	0	8	0	0	0	0	0	0	95	5	0	1	0
A8MT33	242	0.338843	0.0165289	0.136364	0.177686	0.219008	0.0495868	0.0578512	0.00413223	220.978	32.2955	479.496	-0.170826	3.41409	15.2893	42.9752	0	0	37	104	0	0	1	2	0	0	4	2	0	0	0	0	0	0.139918	0.292181	0.99177	0	0	0	0	0	0	0	0	22	1	0	0	1
A8MT65	544	0.220588	0.0845588	0.253676	0.211397	0.112132	0.0294118	0.0404412	0.0477941	223.882	29.8746	433.833	0.0318199	3.63169	0	0	0	0	0	0	0	0	0	0	0	0	1	0	0	0	0	1	1	0	0	0	0	13	1	5	3	0	0	0	60	5	2	1	0
A8MT66	165	0.2	0.0969697	0.29697	0.157576	0.133333	0.0606061	0.0363636	0.0181818	219.48	29.8018	430.382	0.0690303	3.60752	25.4545	0	0	0	42	0	0	0	1	0	0	0	3	2	0	0	0	0	0	0	0	0	0	2	0	1	0	0	0	0	20	0	1	0	0
A8MT69	81	0.432099	0.0493827	0.111111	0.160494	0.160494	0.0123457	0.0740741	0	216.59	33.0877	501.815	-0.098642	3.33358	0	0	0	0	0	0	0	0	0	0	0	0	0	0	0	0	0	0	0	0	0.585366	0.841463	0	4	0	0	0	0	0	0	8	0	0	0	3
A8MT70	800	0.235	0.0625	0.28125	0.16125	0.16875	0.0375	0.03	0.02375	220.302	26.6895	464.426	-0.0307375	3.45427	5	9.5	0	0	40	76	0	0	1	2	0	0	13	5	0	0	0	0	0	0.0736579	0.19975	0.541823	0	17	25	7	0	0	0	0	120	0	0	0	5
A8MTA8	275	0.236364	0.105455	0.210909	0.130909	0.0872727	0.123636	0.0945455	0.0109091	210.233	37.3571	457.84	0.0569091	3.34825	27.2727	0	0	0	75	0	0	0	2	0	0	0	2	2	0	0	0	0	0	0.0688406	0.463768	0.543478	0	5	0	0	0	0	0	0	56	1	1	0	1
A8MTB9	384	0.307292	0.0807292	0.242188	0.119792	0.109375	0.0546875	0.0598958	0.0260417	214.143	34.9974	448.992	0.0920833	3.40169	0	0	0	0	0	0	0	0	0	0	0	0	0	0	0	0	0	1	1	0	0	0	1	13	0	0	0	0	0	0	60	5	1	0	0
A8MTI9	375	0.330667	0.08	0.208	0.122667	0.056	0.0853333	0.08	0.0373333	210.39	36.4547	458.371	0.15088	3.28981	0	0	0	0	0	0	0	0	0	0	0	0	0	0	0	0	0	1	1	0.0558511	0.242021	0.138298	0	13	0	0	0	0	0	0	48	0	1	0	0
A8MTJ3	354	0.30226	0.0932203	0.220339	0.146893	0.144068	0.0169492	0.0508475	0.0254237	217.631	27.6073	458.839	0.0619209	3.47924	0	0	0	0	0	0	0	0	0	0	0	0	0	0	0	0	0	0	0	0.0478873	0.11831	0.140845	0	3	2	6	1	0	0	0	60	0	0	0	0
A8MTJ6	420	0.266667	0.0833333	0.261905	0.0833333	0.0642857	0.133333	0.0952381	0.0119048	197.43	38.7229	493.51	0.037381	2.839	33.3333	0	0	0	140	0	0	0	2	0	0	0	10	5	0	0	0	0	0	0.370546	0.674584	0.693587	0	7	0	2	0	0	0	0	67	1	0	0	0
A8MTL0	148	0.378378	0.114865	0.162162	0.182432	0.0743243	0.0202703	0.027027	0.0405405	230.976	39.0865	423.135	0.0944595	4.03574	0	0	0	0	0	0	0	0	0	0	0	0	0	0	0	0	0	2	1	0	0	0	0	1	0	0	0	0	0	0	25	2	0	1	0
A8MTL3	300	0.22	0.09	0.306667	0.163333	0.07	0.06	0.0633333	0.0266667	215.433	38.1363	462.243	0.0504	3.35863	42	18.6667	0	0	126	56	0	0	3	1	0	0	5	3	0	0	0	0	0	0.109635	0.345515	0.54485	0	0	0	3	0	0	0	0	38	0	0	0	3
A8MTL9	139	0.302158	0.115108	0.28777	0.0935252	0.100719	0	0.0791367	0.0215827	209.296	29.4842	473.007	0.18446	3.26345	0	0	0	0	0	0	0	0	0	0	0	0	0	0	0	0	0	0	0	0	0	0	0	2	0	1	0	0	0	0	20	4	2	0	1
A8MTQ0	251	0.282869	0.0717131	0.215139	0.12749	0.0836653	0.123506	0.0717131	0.0239044	208.295	41.2084	479.996	-0.0939044	3.1245	17.9283	0	0	0	45	0	0	0	1	0	0	0	1	1	0	0	0	0	0	0.238095	0.444444	0.884921	0	7	0	2	0	0	0	0	43	0	0	0	0
A8MTT3	80	0.3	0.15	0.2	0.175	0.0875	0.025	0.0625	0	220.075	28.885	465.425	0.183875	3.71862	0	0	0	0	0	0	0	0	0	0	0	0	0	0	1	0.209877	0.975309	0	0	0	0	0	0	1	0	0	2	0	0	0	12	2	1	1	0
A8MTW9	85	0.341176	0.0117647	0.105882	0.141176	0.0823529	0.141176	0.152941	0.0235294	206.474	46.8424	509.059	-0.078	2.87824	57.6471	0	0	0	49	0	0	0	1	0	0	0	1	1	0	0	0	0	0	0.523256	0.825581	0.825581	1	1	0	0	0	0	0	0	12	2	1	0	0
A8MTZ0	92	0.358696	0.0217391	0.228261	0.184783	0.119565	0.0543478	0.0217391	0.0108696	222.889	26.088	456.109	0.096413	3.51261	0	22.8261	0	0	0	21	0	0	0	1	0	0	1	1	0	0	0	0	0	0.204301	0.204301	0	0	0	0	0	0	0	0	0	13	1	1	0	1
A8MTZ7	269	0.237918	0.070632	0.282528	0.130112	0.141264	0.0743494	0.0446097	0.0185874	214.824	33.4383	452.238	0.0171004	3.37405	14.1264	0	0	0	38	0	0	0	1	0	0	0	4	2	0	0	0	0	0	0.0777778	0.0777778	0	0	11	0	0	0	0	0	0	28	0	0	0	0
A8MTY0	619	0.184168	0.0872375	0.232633	0.243942	0.098546	0.0290792	0.0613893	0.0630048	223.454	28.1559	445.509	-0.0150242	3.53123	0	0	0	0	0	0	0	0	0	0	0	0	0	0	0	0	0	1	1	0	0	0	0	11	6	5	33	0	0	0	46	0	2	0	2
A8MTY7	169	0.0769231	0.0295858	0.360947	0.0591716	0.00591716	0.112426	0.0295858	0.325444	209.973	27.4337	386.089	-0.0549704	2.79467	0	0	0	0	0	0	0	0	0	0	0	0	0	0	0	0	0	0	0	0.770588	0.935294	0.976471	0	3	0	0	0	0	0	0	11	0	1	0	0
A8MU10	97	0.226804	0.0206186	0.206186	0.185567	0.0515464	0.103093	0.134021	0.0721649	211.364	43.5711	470.165	-0.0818557	2.97567	32.9897	0	0	0	32	0	0	0	1	0	0	0	1	1	0	0	0	0	0	0	0	0	0	2	0	0	0	0	0	0	12	6	2	0	0
A8MU46	457	0.238512	0.0371991	0.194748	0.146608	0.212254	0.0743982	0.0853392	0.0109409	208.491	29.6608	496.643	-0.304683	3.00136	64.9891	0	0	0	297	0	0	0	2	0	0	0	10	7	0	0	0	1	1	0.255459	0.672489	0.737991	0	4	0	8	0	0	1	0	75	0	1	0	1
A8MU76	341	0.258065	0.0351906	0.225806	0.184751	0.085044	0.117302	0.0821114	0.0117302	217.188	40.1475	475.408	-0.0316129	3.29229	73.607	0	0	0	251	0	0	0	4	0	0	0	10	7	0	0	0	0	0	0.105263	0.27193	0.561404	0	0	0	0	0	0	0	0	45	2	1	0	0
A8MU93	118	0.211864	0.00847458	0.355932	0.228814	0.0932203	0.059322	0.0338983	0.00847458	221.712	48.789	488.568	-0.216441	3.20415	100	0	0	0	118	0	0	0	1	0	0	0	3	3	0	0	0	0	0	0.285714	0.87395	0.983193	0	0	0	7	0	0	0	0	18	0	1	0	1
A8MUA0	341	0.266862	0.0381232	0.231672	0.181818	0.0791789	0.123167	0.0645161	0.0146628	218.542	39.4704	471.877	-0.0491496	3.34182	74.4868	0	0	0	254	0	0	0	3	0	0	0	11	8	0	0	0	0	0	0.0935673	0.350877	0.52924	0	3	0	0	0	0	0	0	46	3	1	0	0
A8MUH7	402	0.288557	0.0547264	0.201493	0.151741	0.156716	0.0497512	0.0895522	0.00746269	212.137	29.8473	480.953	-0.100547	3.20577	18.9055	0	0	0	76	0	0	0	2	0	0	0	6	3	0	0	0	3	1	0.0297767	0.215881	0	0	9	29	6	0	0	0	0	56	0	0	0	0
A8MUI8	341	0.269795	0.0351906	0.231672	0.175953	0.0909091	0.11437	0.0615836	0.0205279	216.221	36.8073	469.554	-0.0110264	3.28768	37.2434	0	0	0	127	0	0	0	2	0	0	0	11	7	0	0	0	0	0	0.128655	0.25731	0.502924	0	2	0	2	0	0	0	0	46	4	1	0	0
A8MUK1	530	0.286792	0.0679245	0.239623	0.167925	0.103774	0.0509434	0.0509434	0.0320755	216.458	33.4428	454.957	0.00490566	3.38694	20.1887	0	0	0	107	0	0	0	2	0	0	0	5	3	0	0	0	1	1	0.0357815	0.0903955	0.103578	0	16	0	3	0	0	0	0	69	3	1	0	0
A8MUL3	147	0.29932	0.102041	0.258503	0.102041	0.0544218	0.0952381	0.0544218	0.0340136	203.966	39.6503	468.401	0.095034	3.11599	0	0	0	0	0	0	0	0	0	0	0	0	3	2	0	0	0	0	0	0.0945946	0.195946	0.736486	0	3	0	0	0	0	0	0	23	3	1	2	0
A8MUM7	142	0.338028	0.119718	0.176056	0.126761	0.126761	0.0492958	0.0492958	0.0140845	218.366	31.3387	441.289	0.12338	3.68134	0	0	0	0	0	0	0	0	0	0	0	0	0	0	0	0	0	1	1	0	0	0	0	0	0	0	0	0	0	0	26	2	0	3	1
A8MUN3	132	0.280303	0.0757576	0.181818	0.159091	0.0681818	0.106061	0.0833333	0.0454545	207.968	43.6295	469.083	-0.0219697	3.13083	0	0	0	0	0	0	0	0	0	0	0	0	1	0	0	0	0	0	0	0.210526	0.458647	0.458647	0	4	0	0	0	0	0	0	17	6	1	0	0
A8MUP2	240	0.3375	0.0833333	0.191667	0.0916667	0.0875	0.075	0.1	0.0333333	205.669	37.0375	472.938	0.139417	3.14992	0	0	0	0	0	0	0	0	0	0	0	0	0	0	0	0	0	0	0	0.0622407	0	0	0	10	0	0	0	0	0	0	44	0	1	0	0
A8MUP6	293	0.327645	0.0921502	0.215017	0.112628	0.0921502	0.0443686	0.0784983	0.0375427	210.523	36.1229	462.341	0.0844369	3.30642	0	0	0	0	0	0	0	0	0	0	0	0	0	0	3	0.22449	0.993197	0	0	0.047619	0.180272	0	1	15	0	0	0	0	0	0	19	4	1	0	0
A8MUU1	101	0.257426	0.049505	0.267327	0.168317	0.138614	0.00990099	0.0693069	0.039604	218.913	28.9535	465.644	-0.0455446	3.31574	0	0	0	0	0	0	0	0	0	0	0	0	1	1	0	0	0	0	0	0	0	0	0	2	0	0	1	0	1	0	10	0	0	0	0
A8MUU9	505	0.209901	0.00990099	0.390099	0.227723	0	0.160396	0.0019802	0	223.442	56.343	483.414	0.0610495	3.27089	97.8218	0	0	0	494	0	0	0	1	0	0	0	5	5	0	0	0	0	0	0.300395	0.964427	0.964427	0	0	0	16	0	0	0	0	150	0	0	0	0
A8MUV8	499	0.180361	0.0901804	0.200401	0.250501	0.112224	0.0320641	0.0561122	0.0781563	226.474	30.9954	443.1	-0.0432265	3.60471	0	0	0	0	0	0	0	0	0	0	0	0	1	0	0	0	0	1	1	0	0	0	0	7	0	6	7	0	2	0	46	6	3	1	0
A8MUX0	517	0.201161	0.032882	0.303675	0.0580271	0.0638298	0.139265	0.0174081	0.183752	206.334	30.3478	440.429	-0.122901	2.82783	0	0	0	0	0	0	0	0	0	0	0	0	0	0	0	0	0	0	0	0.148649	0.803089	0.988417	0	30	0	0	0	0	0	0	75	1	0	0	0
A8MUZ8	300	0.22	0.0766667	0.253333	0.223333	0.0966667	0.0266667	0.0533333	0.05	223.966	32.261	441.04	0.0747667	3.57913	0	0	0	0	0	0	0	0	0	0	0	0	0	0	0	0	0	1	1	0	0	0	0	9	0	0	0	0	0	0	37	0	0	0	1
A8MV23	424	0.313679	0.103774	0.240566	0.113208	0.0849057	0.0566038	0.0707547	0.0165094	210.534	35.0618	468.521	0.177382	3.33413	0	0	0	0	0	0	0	0	0	0	0	0	1	0	0	0	0	0	0	0.0329412	0.0682353	0.202353	1	13	0	4	0	0	0	0	71	4	0	0	1
A8MV24	154	0.246753	0.12987	0.207792	0.175325	0.0779221	0.0519481	0.103896	0.00649351	215.102	42.3584	453.662	0.00435065	3.49565	0	0	0	0	0	0	0	0	0	0	0	0	1	0	0	0	0	0	0	0	0	0	0	9	0	0	0	0	0	0	27	0	0	0	0
A8MV57	137	0.284672	0.124088	0.20438	0.109489	0.0948905	0.0510949	0.109489	0.0218978	206.395	33.1168	464.248	0.0793431	3.28387	0	0	0	0	0	0	0	0	0	0	0	0	0	0	0	0	0	1	1	0	0	0	0	3	0	0	0	0	0	0	16	2	3	2	0
A8MV65	326	0.236196	0.0889571	0.242331	0.134969	0.101227	0.125767	0.0552147	0.0153374	205.675	36.1696	438.561	0.0191411	3.24095	25.4601	0	0	0	83	0	0	0	2	0	0	0	8	5	0	0	0	0	0	0.152905	0.360856	0.688073	0	6	0	0	1	0	0	0	46	2	0	1	2
A8MV72	311	0.273312	0.0321543	0.21865	0.186495	0.0836013	0.106109	0.0868167	0.0128617	216.767	39.0023	478.051	-0.0315434	3.26749	61.4148	0	0	0	191	0	0	0	2	0	0	0	12	8	0	0	0	0	0	0.105769	0.346154	0.580128	0	0	0	0	0	0	0	0	37	1	1	0	0
A8MV81	97	0.319588	0.113402	0.185567	0.175258	0.0927835	0.0309278	0.0721649	0.0103093	218.236	36.3979	463.371	0.035567	3.54134	0	0	0	0	0	0	0	0	0	0	0	0	0	0	2	0.438776	0.979592	1	1	0	0	0	0	2	0	0	0	0	0	0	18	2	0	1	0
A8MVA2	160	0.08125	0.0375	0.36875	0.05625	0	0.1	0.04375	0.3125	208.201	27.9206	390.663	-0.046125	2.77387	0	0	0	0	0	0	0	0	0	0	0	0	0	0	0	0	0	0	0	0.714286	0.975155	0.987578	0	6	0	0	0	0	0	0	15	0	0	0	0
A8MVJ9	347	0.291066	0.0979827	0.158501	0.178674	0.146974	0.0489914	0.0576369	0.0201729	219.064	28.3654	462.501	-0.020317	3.53389	0	0	0	0	0	0	0	0	0	0	0	0	1	0	0	0	0	0	0	0.0316092	0.109195	0	0	9	0	0	0	0	0	0	54	1	0	0	0
A8MVM7	634	0.252366	0.0804416	0.26183	0.212934	0.0993691	0.0425868	0.0268139	0.0236593	224.138	31.2292	453.415	0.0849054	3.60956	8.51735	0	0	0	54	0	0	0	1	0	0	0	6	3	0	0	0	0	0	0.0220472	0.0866142	0.23937	0	17	0	0	0	0	0	0	81	1	0	2	0
A8MVS1	300	0.223333	0.08	0.23	0.226667	0.106667	0.03	0.0533333	0.05	224.466	32.3313	440.683	0.0511667	3.60303	0	0	0	0	0	0	0	0	0	0	0	0	0	0	0	0	0	1	1	0	0	0	0	12	0	0	0	0	0	0	42	0	0	0	0
A8MVS5	230	0.304348	0.0782609	0.273913	0.0913043	0.0782609	0.0913043	0.0652174	0.0173913	206.655	35.8291	478.509	0.123957	3.12839	19.5652	0	0	0	45	0	0	0	1	0	0	0	1	0	1	0.108225	0.991342	0	0	0.242424	0.268398	0.554113	1	12	0	0	0	0	0	0	24	7	6	0	0
A8MVU1	366	0.265027	0.0846995	0.210383	0.166667	0.131148	0.0819672	0.0491803	0.010929	218.977	35.0861	455.973	-0.0554645	3.51448	28.6885	0	0	0	105	0	0	0	2	0	0	0	6	3	0	0	0	3	2	0.0381471	0.158038	0.433243	0	7	0	0	0	0	0	0	67	3	1	0	0
A8MVW0	826	0.308717	0.0544794	0.197337	0.119855	0.0968523	0.11138	0.104116	0.00726392	206.211	40.9335	493.745	-0.000484262	3.03283	38.3777	0	0	0	317	0	0	0	3	0	0	0	13	12	1	0.0290206	0.997582	0	0	0.251511	0.448609	0.813785	1	20	17	19	1	0	0	0	83	1	0	0	1
A8MVW5	462	0.300866	0.0952381	0.229437	0.116883	0.0974026	0.0692641	0.0714286	0.0194805	211.341	30.6513	456.132	0.101061	3.34703	0	0	0	0	0	0	0	0	0	0	0	0	0	0	1	0.0453564	0.99568	2	1	0.0561555	0.0777538	0	0	16	24	7	0	0	0	0	79	0	0	0	1
A8MVX0	844	0.276066	0.0722749	0.223934	0.151659	0.135071	0.07109	0.0545024	0.0154028	215.392	32.2786	468.569	-0.0454384	3.36607	40.2844	2.72512	0	0	340	23	0	0	6	1	0	0	18	13	0	0	0	1	1	0.0698225	0.217751	0.35503	0	4	0	6	0	0	0	0	131	4	1	0	0
A8MVZ5	291	0.32646	0.0859107	0.19244	0.147766	0.106529	0.0446735	0.0618557	0.0343643	215.047	39.1357	461.137	-0.017354	3.38646	0	0	0	0	0	0	0	0	0	0	0	0	1	0	1	0.0753425	0.993151	1	1	0	0.10274	0	1	10	0	0	0	0	0	0	12	1	0	0	0
A8MW19	530	0.320755	0.120755	0.213208	0.122642	0.103774	0.0509434	0.0566038	0.0113208	213.066	36.0853	467.13	0.0672264	3.44566	0	0	0	0	0	0	0	0	0	0	0	0	0	0	0	0	0	1	1	0.0150659	0.0696798	0	0	12	0	0	0	0	0	0	0	1	0	0	0
A8MW92	1017	0.240905	0.06588	0.228122	0.174041	0.157325	0.0639135	0.0471976	0.0226155	218.123	29.4634	464.189	-0.0853294	3.40359	42.9695	0	0	0	437	0	0	0	5	0	0	0	18	15	0	0	0	2	1	0.0952849	0.259332	0.40275	0	10	15	30	9	0	5	0	155	0	0	0	9
A8MW95	431	0.322506	0.0696056	0.225058	0.111369	0.148492	0.0301624	0.0696056	0.0232019	214.062	32.7327	471.812	0.00062645	3.32118	13.4571	23.8979	0	0	58	103	0	0	1	1	0	0	2	2	0	0	0	0	0	0.122685	0.252315	0.428241	0	8	0	0	0	0	0	0	49	2	2	1	0
A8MW99	385	0.296104	0.0909091	0.277922	0.132468	0.124675	0.0285714	0.0337662	0.0155844	218.112	29.4348	466.784	0.178182	3.51826	0	9.35065	0	0	0	36	0	0	0	1	0	0	2	0	0	0	0	0	0	0.0336788	0	0	0	6	0	0	0	0	0	0	72	2	1	0	0
A8MWA4	300	0.22	0.0766667	0.24	0.213333	0.11	0.0366667	0.0533333	0.05	222.542	31.7617	438.32	0.0719667	3.56167	0	0	0	0	0	0	0	0	0	0	0	0	0	0	0	0	0	1	1	0	0	0	0	12	0	3	0	0	1	0	36	0	0	0	0
A8MWA6	464	0.25431	0.0301724	0.219828	0.172414	0.0926724	0.137931	0.0711207	0.0215517	211.638	39.2677	477.601	-0.126466	3.10366	81.4655	0	0	0	378	0	0	0	2	0	0	0	10	10	0	0	0	0	0	0.0946237	0.44086	0.776344	0	0	0	0	0	0	0	0	50	6	0	0	0
A8MWD9	76	0.342105	0.0526316	0.171053	0.171053	0.118421	0.0394737	0.0921053	0.0131579	217.572	30.5579	459.408	0.124868	3.41842	0	0	0	0	0	0	0	0	0	0	0	0	0	0	0	0	0	0	0	0	0	0	0	2	80	0	2	0	0	0	9	1	0	0	0
A8MWE9	144	0.319444	0.0902778	0.215278	0.125	0.145833	0.0555556	0.0416667	0.00694444	214.551	26.8042	451.875	0.140764	3.49708	0	0	0	0	0	0	0	0	0	0	0	0	0	0	0	0	0	2	1	0	0.158621	0	0	2	0	0	0	0	0	0	22	2	0	2	1
A8MWG7	1328	0.254518	0.0587349	0.268825	0.161145	0.134036	0.060241	0.0421687	0.0203313	218.066	29.559	453.788	0.0481099	3.42513	22.8163	2.40964	0	0	303	32	0	0	6	1	0	0	28	21	0	0	0	1	1	0.0300978	0.0511663	0.0451467	0	21	0	0	0	0	0	0	174	2	1	0	0
A8MWK0	482	0.309129	0.145228	0.186722	0.151452	0.0912863	0.0477178	0.0518672	0.0165975	216.445	31.317	434.624	0.203963	3.70614	0	0	0	0	0	0	0	0	0	0	0	0	3	0	5	0.200828	0.995859	1	1	0.0207039	0.047619	0	0	11	0	0	0	0	0	0	67	1	0	3	0
A8MWL6	223	0.318386	0.170404	0.219731	0.0538117	0.0896861	0.058296	0.0672646	0.0224215	203.47	32.9215	466.789	0.0999103	3.29969	0	0	0	0	0	0	0	0	0	0	0	0	0	0	4	0.375	0.991071	1	1	0.0669643	0	0.200893	0	4	0	0	0	0	0	0	23	0	2	2	0
A8MWL7	114	0.421053	0.140351	0.131579	0.0789474	0.0350877	0.0526316	0.140351	0	200.819	36.8079	492.991	0.260088	3.17053	0	0	0	0	0	0	0	0	0	0	0	0	0	0	3	0.495652	0.982609	0	0	0.130435	0	0.626087	0	1	0	0	0	0	0	0	6	1	0	0	0
A8MWP4	228	0.223684	0.0307018	0.236842	0.153509	0.0614035	0.171053	0.0833333	0.0394737	208.992	42.7202	448.925	-0.102456	3.08811	83.7719	0	0	0	191	0	0	0	3	0	0	0	6	5	0	0	0	0	0	0.0917031	0.327511	0.611354	0	1	0	0	0	0	0	0	34	3	0	0	0
A8MWP6	167	0.329341	0.0838323	0.203593	0.0838323	0.0838323	0.0598802	0.125749	0.0299401	205.845	38.4832	476.425	0.180838	3.17898	0	0	0	0	0	0	0	0	0	0	0	0	0	0	0	0	0	0	0	0	0	0.654762	0	7	0	0	0	0	0	0	13	3	0	0	0
A8MWV9	139	0.316547	0.0647482	0.28777	0.115108	0.0791367	0.0431655	0.0791367	0.0143885	209.582	32.3971	487.986	0.140935	3.13568	0	0	0	0	0	0	0	0	0	0	0	0	0	0	1	0.128571	0.985714	0	0	0	0	0	0	7	0	0	0	0	0	0	19	4	3	0	0
A8MWX3	477	0.283019	0.0461216	0.21174	0.132075	0.12369	0.111111	0.0838574	0.00838574	210.354	34.657	478.964	-0.0765409	3.14769	34.8008	5.24109	0	0	166	25	0	0	3	1	0	0	10	8	0	0	0	1	1	0.198745	0.443515	0.443515	0	3	0	0	4	0	0	0	81	3	0	0	0
A8MWY0	1029	0.22449	0.105928	0.241011	0.11759	0.114674	0.0592809	0.079689	0.0573372	210.17	30.3671	456.216	0.027483	3.25721	0	0	0	0	0	0	0	0	0	0	0	0	2	0	2	0.0368932	0.998058	0	0	0.0252427	0.084466	0.0553398	0	27	1	10	0	0	0	0	18	1	2	0	6
A8MX19	464	0.262931	0.0301724	0.213362	0.174569	0.0905172	0.137931	0.0689655	0.0215517	211.545	39.9884	479.263	-0.124397	3.0969	81.25	0	0	0	377	0	0	0	3	0	0	0	10	10	0	0	0	0	0	0.0989247	0.47957	0.774194	0	0	0	0	0	0	0	0	56	6	0	0	0
A8MX34	341	0.178886	0.0469208	0.337243	0.0469208	0.0410557	0.11437	0.0615836	0.173021	201.494	29.0334	438.273	-0.0297947	2.74452	0	0	0	0	0	0	0	0	0	0	0	0	0	0	0	0	0	0	0	0.0438596	0.578947	0.856725	0	16	0	0	0	0	0	0	45	6	3	0	0
A8MX76	684	0.290936	0.116959	0.207602	0.147661	0.108187	0.0482456	0.0599415	0.0204678	219.539	33.8308	450.377	0.127456	3.66164	0	0	0	0	0	0	0	0	0	0	0	0	0	0	0	0	0	4	2	0.0306569	0.10365	0	0	15	0	2	0	0	0	0	110	0	1	1	1
A8MX80	341	0.26393	0.0351906	0.222874	0.187683	0.0821114	0.117302	0.0762463	0.0146628	217.115	39.0889	472.12	-0.0299413	3.29868	72.434	0	0	0	247	0	0	0	3	0	0	0	12	7	0	0	0	0	0	0.0818713	0.397661	0.561404	0	0	0	0	0	0	1	0	43	3	1	0	0
A8MXD5	290	0.255172	0.062069	0.210345	0.165517	0.137931	0.0310345	0.0896552	0.0482759	217.021	33.3686	468.466	-0.0770345	3.2951	0	0	0	0	0	0	0	0	0	0	0	0	3	2	0	0	0	1	1	0	0.14433	0.274914	0	14	0	0	0	0	0	0	41	3	1	0	0
A8MXE2	369	0.322493	0.124661	0.195122	0.132791	0.108401	0.0460705	0.0406504	0.0298103	218.504	28.9084	444.236	0.221057	3.65062	0	0	0	0	0	0	0	0	0	0	0	0	0	0	1	0.0486486	0.994595	0	0	0	0	0	0	4	0	0	0	0	0	0	4	1	1	0	0
A8MXJ8	464	0.260776	0.0301724	0.215517	0.170259	0.0926724	0.140086	0.0689655	0.0215517	211.421	39.6336	477	-0.133233	3.10099	81.8966	0	0	0	380	0	0	0	3	0	0	0	12	10	0	0	0	0	0	0.0989247	0.307527	0.711828	0	0	1	1	0	0	0	0	53	6	0	0	0
A8MXK1	200	0.34	0.09	0.225	0.13	0.095	0.025	0.06	0.035	215.892	33.367	470.15	0.0812	3.3973	0	0	0	0	0	0	0	0	0	0	0	0	0	0	1	0.109453	0.99005	1	1	0.154229	0.164179	0	1	4	0	1	0	0	0	0	20	0	0	0	1
A8MXK9	166	0.319277	0.0843373	0.198795	0.0903614	0.0843373	0.0662651	0.126506	0.0301205	206.006	39.4717	474.916	0.156867	3.17946	0	0	0	0	0	0	0	0	0	0	0	0	0	0	0	0	0	0	0	0	0	0.652695	0	6	0	0	0	0	0	0	14	3	0	0	0
A8MXQ7	604	0.311258	0.0529801	0.167219	0.163907	0.15894	0.0596026	0.0711921	0.0149007	219.88	40.8722	473.733	-0.196904	3.41714	18.8742	14.2384	0	0	114	86	0	0	2	2	0	0	6	5	0	0	0	1	1	0.181818	0.454545	0.715702	0	14	0	0	0	0	0	0	65	0	0	0	0
A8MXT2	336	0.261905	0.077381	0.229167	0.160714	0.125	0.0654762	0.0714286	0.00892857	215.835	36.5551	477.771	-0.0798214	3.3464	32.1429	0	0	0	108	0	0	0	1	0	0	0	4	3	0	0	0	1	1	0.237389	0.400593	0.474777	0	5	0	0	0	0	0	0	60	3	0	1	0
A8MXU0	73	0.246575	0.0958904	0.164384	0.178082	0.0958904	0.0821918	0.0547945	0.0821918	221.713	35.2918	431.562	0.115068	3.57534	0	0	0	0	0	0	0	0	0	0	0	0	0	0	0	0	0	0	0	0	0	0	1	1	0	0	0	0	0	0	7	2	2	0	0
A8MXV4	375	0.288	0.101333	0.152	0.154667	0.112	0.112	0.064	0.016	213.591	40.8381	457.475	0.06896	3.45213	0	0	0	0	0	0	0	0	0	0	0	0	4	1	0	0	0	1	1	0.0930851	0.31383	0.478723	0	7	8	3	3	0	0	0	58	2	0	1	0
A8MXV6	281	0.33452	0.0533808	0.174377	0.131673	0.0782918	0.106762	0.0960854	0.024911	209.627	41.3367	482.235	-0.00733096	3.12406	39.5018	0	0	0	111	0	0	0	2	0	0	0	4	4	1	0.0815603	0.992908	0	0	0.336879	0.592199	0.819149	0	9	1	5	0	0	0	0	30	1	0	0	0
A8MXY4	864	0.199074	0.0949074	0.181713	0.27662	0.100694	0.03125	0.0509259	0.0648148	227.271	28.445	442.913	-0.0205093	3.66912	0	0	0	0	0	0	0	0	0	0	0	0	0	0	0	0	0	1	1	0.0473988	0	0	0	5	0	8	21	0	1	0	62	1	0	0	1
A8MXZ1	464	0.258621	0.0301724	0.215517	0.174569	0.0905172	0.140086	0.0689655	0.0215517	211.921	39.8556	477.291	-0.12903	3.11203	82.5431	0	0	0	383	0	0	0	2	0	0	0	11	10	0	0	0	0	0	0.0860215	0.449462	0.776344	0	0	0	0	0	0	0	0	56	6	0	0	0
A8MXZ3	250	0.044	0.02	0.376	0.06	0.004	0.112	0.028	0.356	211.384	26.8276	375.872	-0.07764	2.77412	0	0	0	0	0	0	0	0	0	0	0	0	0	0	0	0	0	0	0	0.796813	0.984064	0.984064	0	4	0	0	0	0	0	0	18	0	0	0	3
A8MY62	500	0.36	0.09	0.146	0.128	0.09	0.094	0.084	0.008	209.677	39.1382	482.252	0.0851	3.27354	0	0	0	0	0	0	0	0	0	0	0	0	0	0	0	0	0	0	0	0.159681	0.329341	0.638723	0	27	0	5	0	0	0	0	77	0	0	0	1
A8MYA2	514	0.231518	0.0486381	0.200389	0.151751	0.110895	0.124514	0.116732	0.0155642	206.656	41.3339	486.16	-0.192004	2.98854	81.323	0	0	0	418	0	0	0	4	0	0	0	12	12	0	0	0	0	0	0.100971	0.44466	0.827184	0	1	0	9	0	0	0	0	63	0	1	0	0
A8MYB1	307	0.32899	0.0618893	0.218241	0.153094	0.188925	0.019544	0.0162866	0.0130293	225.154	23.3055	470.127	0.0169707	3.63844	0	58.9577	0	0	0	181	0	0	0	3	0	0	1	0	1	0.0681818	0.993506	0	0	0.191558	0.461039	0.714286	0	5	0	0	0	0	0	0	48	0	0	0	0
A8MYJ7	566	0.390459	0.0371025	0.166078	0.14311	0.114841	0.040636	0.0795053	0.0282686	212.497	38.5839	498.307	-0.03447	3.12631	0	0	0	0	0	0	0	0	0	0	0	0	2	1	0	0	0	0	0	0.0723104	0.462081	0.613757	0	24	0	0	0	0	0	0	64	2	0	0	1
A8MYP8	253	0.241107	0.102767	0.189723	0.150198	0.0474308	0.146245	0.110672	0.0118577	206.976	44.9933	470.221	-0.0633597	3.15719	11.8577	0	0	0	30	0	0	0	1	0	0	0	7	5	0	0	0	0	0	0.0472441	0.0984252	0.562992	0	4	0	1	0	0	0	0	37	0	0	0	4
A8MYU2	1149	0.308964	0.10705	0.250653	0.118364	0.0948651	0.0443864	0.0504787	0.0252393	214.955	31.3006	461.208	0.229164	3.45579	0	0	0	0	0	0	0	0	0	0	0	0	4	1	5	0.0947826	0.998261	1	1	0.0373913	0.114783	0.147826	0	22	0	5	0	0	0	0	180	4	1	1	4
A8MYV0	355	0.284507	0.0985915	0.160563	0.194366	0.115493	0.0704225	0.0619718	0.0140845	219.918	32.9682	464.699	-0.0769859	3.53518	0	0	0	0	0	0	0	0	0	0	0	0	0	0	0	0	0	2	1	0.0280899	0	0	0	6	0	5	0	0	1	0	72	0	0	0	0
A8MYX2	175	0.274286	0.04	0.217143	0.125714	0.0971429	0.0914286	0.12	0.0342857	203.747	36.672	483.017	-0.0297714	2.92806	28.5714	0	0	0	50	0	0	0	1	0	0	0	5	2	0	0	0	0	0	0.170455	0.545455	0.948864	0	0	0	0	0	0	0	0	20	1	2	0	0
A8MYZ0	460	0.280435	0.1	0.241304	0.132609	0.115217	0.0347826	0.076087	0.0195652	214.61	32.8387	461.83	0.127348	3.42985	6.52174	0	0	0	30	0	0	0	1	0	0	0	2	1	0	0	0	0	0	0.117137	0.167028	0	0	18	0	0	0	0	0	0	70	0	1	0	0
A8MYZ5	107	0.401869	0.0934579	0.186916	0.214953	0.0560748	0	0.0186916	0.0280374	233.831	46.9112	426.196	0.0166355	4.02402	0	0	0	0	0	0	0	0	0	0	0	0	0	0	0	0	0	1	1	0.12037	0.37963	0.916667	1	0	0	3	0	0	0	0	25	0	0	0	0
A8MYZ6	492	0.327236	0.0609756	0.136179	0.105691	0.113821	0.132114	0.115854	0.00813008	198.683	39.0112	501.512	-0.0682927	2.83646	42.0732	0	0	0	207	0	0	0	4	0	0	0	8	6	0	0	0	0	0	0.482759	0.640974	0.787018	0	10	0	5	0	0	0	0	59	2	0	0	0
A8MZ14	127	0.291339	0.0393701	0.267717	0.102362	0.110236	0.133858	0.023622	0.0314961	207.279	36.1457	474.74	0.0356693	3.03236	24.4094	0	0	0	31	0	0	0	1	0	0	0	2	1	0	0	0	0	0	0.109375	0.210938	0.65625	0	2	0	0	0	0	0	0	0	2	1	0	0
A8MZ25	164	0.207317	0.0609756	0.176829	0.219512	0.0792683	0.121951	0.109756	0.0243902	216.868	49.7043	468.628	-0.169756	3.2947	46.9512	0	0	0	77	0	0	0	1	0	0	0	4	3	0	0	0	0	0	0.10303	0.745455	0.775758	0	2	0	0	0	0	0	0	16	3	0	0	0
A8MZ26	197	0.304569	0.147208	0.152284	0.203046	0.13198	0.00507614	0.0406091	0.0152284	227.729	27.736	436.34	0.180761	3.98193	0	0	0	0	0	0	0	0	0	0	0	0	1	0	0	0	0	2	1	0.0909091	0	0	0	0	0	2	0	0	0	0	39	2	3	2	0
A8MZ36	301	0.282392	0.0365449	0.199336	0.169435	0.156146	0.0564784	0.076412	0.0232558	218.074	37.6565	456.352	-0.203256	3.3599	32.8904	13.9535	0	0	99	42	0	0	2	2	0	0	7	6	0	0	0	0	0	0.13245	0.311258	0.357616	0	3	0	0	2	0	0	0	26	0	0	0	0
A8MZ59	168	0.27381	0.0714286	0.297619	0.113095	0.113095	0.0714286	0.047619	0.0119048	211.951	31.5827	465.994	0.02375	3.2756	40.4762	0	0	0	68	0	0	0	1	0	0	0	4	2	0	0	0	0	0	0.106509	0	0	0	3	0	0	0	0	0	0	32	1	0	0	1
A8MZ97	194	0.314433	0.0463918	0.21134	0.149485	0.14433	0.056701	0.0515464	0.0257732	219.944	29.5526	461.845	-0.0092268	3.43021	29.8969	0	0	0	58	0	0	0	1	0	0	0	3	2	1	0.112821	0.989744	0	0	0.102564	0.307692	0	0	1	0	0	0	0	0	0	26	4	2	0	4
A8MZA4	724	0.201657	0.0372928	0.197514	0.236188	0.287293	0.0234807	0.0110497	0.00552486	238.043	26.1189	413.456	-0.316644	4.06478	16.0221	16.1602	0	1.10497	116	117	0	8	1	1	0	0	2	2	0	0	0	0	0	0.61931	0.751724	0.758621	0	0	0	5	0	0	1	0	40	0	0	0	0
A8MZF0	331	0.271903	0.0362538	0.21148	0.117825	0.0876133	0.205438	0.060423	0.00906344	206.17	41.9755	468.532	-0.101148	3.05728	85.8006	0	0	0	284	0	0	0	3	0	0	0	10	8	0	0	0	0	0	0.28012	0.638554	0.861446	0	0	0	0	0	0	0	0	64	2	3	0	1
A8MZG2	182	0.252747	0.043956	0.203297	0.137363	0.0934066	0.126374	0.104396	0.0384615	208.686	40.8308	472.412	0.00384615	3.08841	38.4615	0	0	0	70	0	0	0	2	0	0	0	5	4	0	0	0	0	0	0.120219	0.300546	0.68306	0	2	0	0	0	0	0	0	25	3	2	0	1
A8MZH6	123	0.292683	0.154472	0.186992	0.146341	0.0731707	0.0487805	0.0487805	0.0487805	218.605	31.4106	425.78	0.210407	3.74634	0	0	0	0	0	0	0	0	0	0	0	0	0	0	0	0	0	0	0	0	0	0	1	0	0	0	0	0	0	0	20	3	1	0	0
A8TX70	2615	0.281836	0.082218	0.227916	0.13805	0.121606	0.0413002	0.0933078	0.0137667	213.147	31.6472	470.569	0.0331778	3.30215	0.229446	0.803059	0.344168	0	6	21	9	0	0	1	0	0	13	10	0	0	0	16	2	0.0603976	0.145642	0.142966	1	58	0	20	0	0	1	0	355	0	1	0	4
A9QM74	516	0.377907	0.0465116	0.228682	0.114341	0.112403	0.0503876	0.0484496	0.0213178	215.064	29.6971	475.959	0.103391	3.30403	0	0	0	0	0	0	0	0	0	0	0	0	1	0	0	0	0	1	1	0.0232108	0	0.212766	0	12	0	2	0	0	0	0	83	0	0	2	0
A9UHW6	222	0.351351	0.0900901	0.193694	0.121622	0.135135	0.0315315	0.0495495	0.027027	217.938	30.6054	459.225	0.0404505	3.52311	0	9.45946	0	0	0	21	0	0	0	1	0	0	0	0	0	0	0	1	1	0.0672646	0.112108	0	0	2	4	1	6	0	0	0	28	2	2	0	7
A9YTQ3	701	0.281027	0.0542083	0.198288	0.151213	0.0927247	0.109843	0.0798859	0.0328103	211.474	39.5655	466.69	-0.0328103	3.18827	33.5235	0	0	0	235	0	0	0	4	0	0	0	15	12	0	0	0	2	2	0.115385	0.273504	0.441595	0	10	0	5	4	0	0	0	88	0	0	0	7
A9Z1Z3	1794	0.314939	0.0780379	0.15942	0.138239	0.132107	0.0852843	0.0791527	0.0128205	215.076	36.888	469.261	-0.0169342	3.40681	7.80379	2.34114	0	0	140	42	0	0	3	2	0	0	10	4	1	0.0122563	0.998886	5	1	0.139833	0.272423	0.559889	0	61	0	0	0	0	0	0	284	1	1	0	0
B0FP48	263	0.346008	0.0646388	0.281369	0.0912548	0.0608365	0.0722433	0.0684411	0.0152091	209.155	36.2624	481.479	0.167795	3.16186	0	0	0	0	0	0	0	0	0	0	0	0	1	0	1	0.106061	0.992424	0	0	0.151515	0.272727	0.340909	0	13	18	0	2	0	0	0	22	1	2	0	0
B0I1T2	1018	0.318271	0.086444	0.1778	0.17387	0.119843	0.0451866	0.0609037	0.0176817	219.713	37.5868	459.145	-0.0180059	3.53074	0	0	0	0	0	0	0	0	0	0	0	0	1	0	0	0	0	3	3	0.0274779	0.13739	0.114818	0	30	0	32	29	2	4	0	140	1	1	0	2
B0L653	375	0.274667	0.0746667	0.258667	0.128	0.0773333	0.0906667	0.072	0.024	208.146	37.788	466.192	0.0991467	3.16592	17.8667	0	0	0	67	0	0	0	1	0	0	0	4	2	1	0.0585106	0.994681	2	1	0.0664894	0.117021	0.226064	1	14	0	0	0	0	0	0	55	5	2	0	0
B0QYN4	138	0.318841	0.0434783	0.195652	0.0652174	0.108696	0.137681	0.115942	0.0144928	195.659	38.6123	499.964	-0.0292029	2.71841	23.1884	0	0	0	32	0	0	0	1	0	0	0	6	2	0	0	0	0	0	0	0.640288	0.683453	0	0	0	0	0	0	0	0	49	2	1	1	0
B0YIZ6	170	0.3	0.0647059	0.276471	0.117647	0.1	0.0352941	0.0705882	0.0352941	216.923	27.9629	459.118	0.201294	3.40888	0	18.2353	0	0	0	31	0	0	0	1	0	0	0	0	0	0	0	1	1	0.0643275	0	0	1	6	0	0	0	0	0	0	18	1	0	0	0
B0YJ81	288	0.371528	0.131944	0.177083	0.118056	0.0763889	0.0486111	0.0694444	0.00694444	212.299	35.8733	466.99	0.228299	3.48351	0	0	0	0	0	0	0	0	0	0	0	0	2	2	4	0.307958	0.99308	0	0	0.0968858	0.228374	0.252595	0	1	4	8	0	0	0	0	33	0	0	0	3
B1AHC4	643	0.33126	0.0870918	0.199067	0.150855	0.0917574	0.0730949	0.0559876	0.0108865	217.947	35.6042	465.95	0.105443	3.50547	0	0	0	0	0	0	0	0	0	0	0	0	2	1	0	0	0	2	2	0.0326087	0.0248447	0.0791925	0	14	0	0	0	0	0	0	115	1	2	0	2
B1AJZ1	125	0.296	0.088	0.296	0.144	0.096	0.04	0.024	0.016	215.577	28.8608	443.504	0.2112	3.4828	0	0	0	0	0	0	0	0	0	0	0	0	1	1	0	0	0	0	0	0	0	0	0	1	0	0	0	0	0	0	14	1	0	0	0
B1AJZ9	1412	0.295326	0.0325779	0.240085	0.186261	0.17068	0.0325779	0.0318697	0.0106232	224.289	27.735	469.388	-0.112245	3.5034	12.3938	34.9858	0	0	175	494	0	0	5	7	0	0	25	11	0	0	0	1	1	0.110403	0.424628	0.757962	0	13	0	6	0	0	3	0	154	3	0	1	8
B1AK53	854	0.290398	0.0398126	0.196721	0.141686	0.114754	0.119438	0.0784543	0.0187354	208.798	37.1692	476.549	-0.0659133	3.09196	49.1803	0	0	0.58548	420	0	0	5	1	0	0	0	14	10	0	0	0	1	1	0.233918	0.45848	0.528655	0	19	0	11	0	0	0	0	128	0	0	0	8
B1AK76	121	0.280992	0.0743802	0.264463	0.173554	0.115702	0.0330579	0.0330579	0.0247934	225.352	30.0248	440.893	0.00322314	3.6905	0	0	0	0	0	0	0	0	0	0	0	0	0	0	0	0	0	0	0	0	0	0	0	2	0	0	0	0	0	0	15	4	0	0	0
B1AKI9	464	0.230603	0.0883621	0.247845	0.133621	0.144397	0.0668103	0.0560345	0.0323276	213.161	33.2455	456.778	-0.0295043	3.33248	33.1897	0	0	0	154	0	0	0	3	0	0	0	5	2	0	0	0	2	2	0.0795699	0.131183	0.16129	1	12	0	3	0	0	0	0	54	0	0	1	0
B1AKJ1	182	0.197802	0.0659341	0.192308	0.175824	0.0824176	0.131868	0.131868	0.021978	208.219	51.3176	477.346	-0.304231	3.05275	100	0	0	0	182	0	0	0	1	0	0	0	4	4	0	0	0	0	0	0.191257	0.464481	0.972678	0	0	0	0	0	0	0	0	0	3	0	0	0
B1AL46	878	0.268793	0.0501139	0.216401	0.11959	0.095672	0.136674	0.0876993	0.0250569	207.557	37.0653	475.665	-0.0377904	3.08749	51.5945	0	0	0	453	0	0	0	5	0	0	0	16	14	0	0	0	0	0	0.114903	0.393629	0.775882	0	19	0	0	0	0	0	0	156	4	0	0	1
B1AL88	458	0.237991	0.0873362	0.272926	0.126638	0.115721	0.0436681	0.0676856	0.0480349	214.892	32.9603	460.076	-0.0245852	3.34832	12.4454	0	0	0	57	0	0	0	2	0	0	0	2	2	2	0.0784314	0.995643	0	0	0.163399	0.315904	0.431373	0	10	0	0	0	0	1	0	53	1	1	0	0
B1ALA9	218	0.394495	0.059633	0.165138	0.151376	0.119266	0.0366972	0.0412844	0.0321101	215.407	32.0803	466.482	0.0107798	3.30954	0	0	0	0	0	0	0	0	0	0	0	0	0	0	0	0	0	1	1	0	0	0	0	5	0	0	0	0	0	0	49	2	1	0	0
B1ALS0	181	0.303867	0.104972	0.187845	0.121547	0.143646	0.0276243	0.0883978	0.0220994	215.458	29.4481	465.53	0.0756354	3.46983	0	0	0	0	0	0	0	0	0	0	0	0	0	0	0	0	0	2	1	0	0.137363	0	0	1	0	0	0	0	0	0	40	0	0	0	0
B1ALY0	433	0.274827	0.0300231	0.235566	0.145497	0.191686	0.0438799	0.073903	0.00461894	214.554	28.8651	484.547	-0.153718	3.19979	30.9469	16.1663	0	0.230947	134	70	0	1	2	2	0	0	11	9	0	0	0	0	0	0.0714286	0.228111	0.552995	0	1	1	0	0	0	0	0	44	2	2	0	0
B1AMM8	73	0.273973	0.0821918	0.219178	0.164384	0.123288	0.0684932	0.0684932	0	217.639	35.9425	419.329	0.190411	3.64589	0	0	0	0	0	0	0	0	0	0	0	0	1	0	0	0	0	0	0	0	0	0	0	0	0	0	0	0	0	0	5	1	1	0	0
B1ANA3	197	0.314721	0.0862944	0.177665	0.167513	0.121827	0.0406091	0.0862944	0.00507614	216.998	30.3701	468.731	0.111472	3.46015	0	0	0	0	0	0	0	0	0	0	0	0	0	0	0	0	0	1	1	0	0	0	0	8	0	0	0	0	0	0	0	2	5	0	0
B1ANH7	110	0.290909	0.0545455	0.245455	0.145455	0.0545455	0.145455	0.0363636	0.0272727	212.936	36.9482	447.891	0.137364	3.33691	0	0	0	0	0	0	0	0	0	0	0	0	3	0	0	0	0	0	0	0	0	0	0	5	0	0	0	0	0	0	23	0	0	0	0
B1ANS9	1081	0.299722	0.0897317	0.209991	0.160037	0.122109	0.0444033	0.053654	0.0203515	219.133	31.4569	455.017	0.0715356	3.53664	4.62535	0	0	0	50	0	0	0	1	0	0	0	2	1	0	0	0	0	0	0.0249538	0.101664	0.0480591	0	14	0	9	0	0	0	0	168	1	0	0	4
B1ANY3	271	0.298893	0.0664207	0.202952	0.140221	0.095941	0.0848708	0.0885609	0.0221402	209.904	36.6841	481.572	0.072583	3.18292	11.8081	0	0	0	32	0	0	0	1	0	0	0	4	3	0	0	0	0	0	0	0	0.389706	0	6	0	0	0	0	0	0	29	1	0	1	0
B1APH4	448	0.214286	0.0825893	0.258929	0.174107	0.129464	0.0424107	0.0625	0.0357143	220.422	31.76	446.205	-0.0273438	3.51114	0	0	0	0	0	0	0	0	0	0	0	0	4	1	0	0	0	2	1	0.0623608	0.122494	0.10245	0	19	0	0	1	0	0	0	49	5	3	0	2
B1AQ52	121	0.330579	0.0991736	0.214876	0.0909091	0.0826446	0.0661157	0.0826446	0.0330579	206.342	34.8727	468.504	0.0956198	3.22702	0	0	0	0	0	0	0	0	0	0	0	0	0	0	0	0	0	1	1	0.188525	0.237705	0.418033	1	1	0	0	0	0	0	0	0	1	0	0	0
B1AR61	139	0.309353	0.0647482	0.208633	0.151079	0.151079	0.0359712	0.0647482	0.0143885	215.539	31.5	459.173	0.0551799	3.38072	0	0	0	0	0	0	0	0	0	0	0	0	1	0	0	0	0	1	1	0	0	0	0	3	0	0	0	0	0	0	2	3	1	1	0
B1ATL7	298	0.268456	0.057047	0.201342	0.124161	0.0738255	0.161074	0.090604	0.0234899	204.95	39.643	456.648	0.0541275	3.09128	40.2685	0	0	0	120	0	0	0	3	0	0	0	9	8	0	0	0	0	0	0.100334	0.157191	0.277592	0	4	0	0	0	0	0	0	47	3	0	0	0
B1AVV0	803	0.315068	0.0784558	0.240349	0.0884184	0.143213	0.0647572	0.0647572	0.00373599	209.636	31.82	474.015	0.0230798	3.22641	12.3288	0	0	0	99	0	0	0	1	0	0	0	6	2	0	0	0	6	1	0	0.0485075	0.0995025	0	38	0	0	0	0	0	0	225	0	0	0	0
B1AXG1	227	0.330396	0.105727	0.140969	0.193833	0.145374	0.0176211	0.061674	0.00440529	221.302	31.8282	468.449	0.0635242	3.64075	0	0	0	0	0	0	0	0	0	0	0	0	0	0	0	0	0	1	1	0.0614035	0	0	0	1	0	0	0	0	0	0	116	0	1	0	0
B1AXG2	133	0.330827	0.075188	0.142857	0.203008	0.150376	0.0300752	0.0676692	0	222.605	30.2684	471.383	0.016015	3.58985	0	0	0	0	0	0	0	0	0	0	0	0	0	0	0	0	0	1	1	0	0	0	0	1	0	0	0	0	0	0	7	1	2	0	0
B2CW77	178	0.213483	0.0786517	0.174157	0.224719	0.0674157	0.106742	0.101124	0.0337079	219.797	46.9326	470.478	-0.109607	3.41708	0	0	0	0	0	0	0	0	0	0	0	0	4	1	0	0	0	0	0	0.0614525	0.335196	0.98324	0	9	0	2	0	0	0	0	23	1	1	0	0
B2RBV5	119	0.352941	0.00840336	0.0672269	0.226891	0.193277	0.0756303	0.0420168	0.0336134	224.115	47.0622	479.79	-0.403361	3.35647	31.0924	26.8908	0	0	37	32	0	0	1	1	0	0	2	1	0	0	0	0	0	0.475	0.833333	0.9	0	0	0	1	0	0	0	0	15	0	0	0	0
B2RC85	870	0.249425	0.113793	0.214943	0.167816	0.136782	0.0344828	0.0678161	0.0149425	218.026	31.3879	452.246	0.0521724	3.56849	8.16092	2.41379	0	0	71	21	0	0	1	1	0	0	6	3	0	0	0	0	0	0.0769231	0.137773	0.250287	0	8	1	16	0	0	0	0	119	4	2	0	3
B2RD01	187	0.326203	0.0481283	0.229947	0.165775	0.144385	0.0427807	0.0320856	0.0106952	218.621	33.615	470.642	0.000160428	3.39658	0	11.2299	0	0	0	21	0	0	0	1	0	0	1	1	0	0	0	2	2	0	0	0.590426	0	3	0	3	0	0	0	0	33	2	2	2	0
B2REB0	374	0.342246	0.0909091	0.205882	0.112299	0.128342	0.0534759	0.0508021	0.0160428	212.958	30.7901	479.957	0.0872193	3.36342	0	0	0	0	0	0	0	0	0	0	0	0	0	0	0	0	0	0	0	0.0266667	0.072	0	0	9	0	0	0	0	0	0	115	1	0	0	0
B2RN74	326	0.371166	0.147239	0.217791	0.0674847	0.0398773	0.0490798	0.0613497	0.0460123	209.388	30.8113	451.089	0.45589	3.47012	0	0	0	0	0	0	0	0	0	0	0	0	0	0	7	0.477064	0.993884	0	0	0	0	0	0	0	0	0	0	0	0	0	21	2	0	0	0
B2RNG4	842	0.281473	0.0724466	0.212589	0.167458	0.140143	0.0368171	0.043943	0.0451306	223.926	31.7316	450.825	-0.0286698	3.60524	0	22.3278	0	0	0	188	0	0	0	4	0	0	0	0	0	0	0	5	3	0.084223	0.257414	0.354686	0	13	0	0	0	0	0	0	108	3	1	1	0
B2RNN3	333	0.216216	0.0660661	0.174174	0.138138	0.111111	0.0810811	0.201201	0.012012	203.293	36.5703	496.057	-0.0632132	2.90916	32.4324	0	0	0	108	0	0	0	1	0	0	0	5	3	0	0	0	4	2	0.188623	0.607784	0.526946	1	3	1	0	0	0	0	0	44	1	3	0	1
B2RPK0	211	0.175355	0.0805687	0.127962	0.246445	0.241706	0.056872	0.056872	0.014218	221.107	23.5474	471.479	-0.352654	3.47829	10.9005	0	0	0	23	0	0	0	1	0	0	0	6	4	0	0	0	0	0	0.287736	0.353774	0.353774	0	0	1	0	0	0	0	0	33	0	0	0	0
B2RTY4	2548	0.27865	0.0773155	0.239011	0.175039	0.130691	0.0419937	0.0408163	0.0164835	221.617	31.5021	461.215	0.0226295	3.5439	14.1287	1.84458	0	0	360	47	0	0	8	3	0	0	27	18	0	0	0	8	4	0.0619851	0.18164	0.348372	0	24	12	57	6	1	2	0	385	2	2	0	8
B2RU33	542	0.265683	0.0461255	0.230627	0.175277	0.151292	0.0313653	0.0608856	0.0387454	218.359	28.5103	457.832	-0.0445941	3.36472	26.0148	0	0	0	141	0	0	0	1	0	0	0	4	4	0	0	0	0	0	0	0.0515654	0.163904	0	7	9	3	1	0	0	0	56	4	0	0	2
B2RUY7	222	0.22973	0.0720721	0.144144	0.130631	0.148649	0.0855856	0.0675676	0.121622	212.224	25.9509	431.018	-0.148243	3.22486	0	0	0	0	0	0	0	0	0	0	0	0	0	0	0	0	0	2	1	0	0.210762	0.237668	1	11	0	1	0	0	0	0	13	1	1	0	1
B2RUZ4	78	0.307692	0.102564	0.179487	0.166667	0.0769231	0.0128205	0.115385	0.0384615	215.708	38.4564	467.962	0.0619231	3.4059	0	0	0	0	0	0	0	0	0	0	0	0	0	0	1	0.265823	0.974684	0	0	0	0	0	0	1	0	6	0	0	0	0	4	0	0	0	1
B2RV13	164	0.25	0.0792683	0.262195	0.237805	0.097561	0.0365854	0.0243902	0.0121951	230.785	32.5439	441.896	-0.00780488	3.7947	0	12.8049	0	0	0	21	0	0	0	1	0	0	3	0	0	0	0	0	0	0	0.193939	0	0	6	4	0	0	0	0	0	31	1	2	1	1
B2RXF0	380	0.315789	0.136842	0.176316	0.123684	0.05	0.0684211	0.110526	0.0184211	210.178	42.7834	466.711	0.127579	3.40195	23.1579	0	0	0	88	0	0	0	2	0	0	0	1	0	7	0.309711	0.994751	0	0	0.278215	0.503937	0.488189	0	7	0	0	0	0	0	0	40	1	0	0	0
B2RXF5	422	0.270142	0.0616114	0.163507	0.170616	0.104265	0.109005	0.0734597	0.0473934	214.75	39.531	466.647	-0.0752133	3.27855	28.1991	0	0	0	119	0	0	0	2	0	0	0	4	4	0	0	0	1	1	0.0921986	0.356974	0.553191	0	13	10	0	0	0	0	0	63	1	0	1	0
B2RXH2	506	0.258893	0.0988142	0.233202	0.13834	0.0948617	0.0632411	0.0889328	0.0237154	212.372	35.9603	451.812	0.0610672	3.37389	8.10277	0	0	0	41	0	0	0	1	0	0	0	5	4	0	0	0	2	2	0.086785	0.104536	0.195266	0	13	0	5	0	0	0	0	70	0	0	0	0
B2RXH4	712	0.255618	0.0393258	0.247191	0.119382	0.148876	0.103933	0.0603933	0.0252809	212.193	33.2698	472.878	-0.0335253	3.1914	42.5562	0	0	0	303	0	0	0	3	0	0	0	16	13	0	0	0	1	1	0.0504909	0.255259	0.706872	0	6	0	4	0	0	0	0	132	3	2	0	1
B2RXH8	293	0.255973	0.0511945	0.238908	0.16041	0.174061	0.0341297	0.0819113	0.00341297	212.417	28.7543	487.133	-0.206041	3.14611	35.8362	0	0	0	105	0	0	0	2	0	0	0	5	4	0	0	0	1	1	0.319728	0.479592	0.493197	0	6	0	9	8	1	4	0	25	1	0	0	0
B3EWF7	344	0.287791	0.0406977	0.133721	0.168605	0.0377907	0.156977	0.145349	0.0290698	204.913	52.7282	501.375	-0.17311	2.83843	55.2326	0	0	0	190	0	0	0	2	0	0	0	9	6	0	0	0	0	0	0.365217	0.86087	0.82029	0	10	0	0	0	0	0	0	49	4	2	0	9
B3EWG3	89	0.382022	0	0.168539	0.179775	0.168539	0	0.101124	0	210.386	28.2404	519.528	-0.177865	2.9236	44.9438	0	0	0	40	0	0	0	1	0	0	0	3	3	0	0	0	0	0	0.533333	0.811111	0.822222	0	0	0	0	0	0	0	0	8	2	2	0	0
B3EWG5	89	0.382022	0	0.168539	0.179775	0.168539	0	0.101124	0	210.386	28.2404	519.528	-0.177865	2.9236	44.9438	0	0	0	40	0	0	0	1	0	0	0	3	3	0	0	0	0	0	0.533333	0.811111	0.822222	0	0	0	0	0	0	0	0	8	2	2	0	0
B3EWG6	89	0.382022	0	0.168539	0.179775	0.168539	0	0.101124	0	210.386	28.2404	519.528	-0.177865	2.9236	44.9438	0	0	0	40	0	0	0	1	0	0	0	3	3	0	0	0	0	0	0.533333	0.811111	0.822222	0	0	0	0	0	0	0	0	8	2	2	0	0
B3GLJ2	98	0.285714	0.132653	0.22449	0.173469	0.0408163	0	0.0306122	0.112245	228.717	32.2939	411.184	0.245102	3.84724	0	0	0	0	0	0	0	0	0	0	0	0	0	0	0	0	0	1	1	0	0	0	1	1	0	0	0	0	0	0	23	0	1	2	0
B3KS81	715	0.0895105	0.0181818	0.391608	0.296503	0.0699301	0.0853147	0.0433566	0.00559441	226.312	51.272	475.397	-0.265874	3.31817	100	0	0	0	715	0	0	0	1	0	0	0	12	11	0	0	0	0	0	0.265363	0.851955	0.994413	0	0	0	26	0	0	0	0	84	5	0	0	0
B3KU38	563	0.245115	0.035524	0.257549	0.143872	0.165187	0.0746004	0.0639432	0.0142096	213.451	32.6492	467.821	-0.106412	3.21085	60.746	11.5453	0	0	342	65	0	0	2	1	0	0	14	11	0	0	0	1	1	0.303191	0.524823	0.886525	0	0	0	0	0	0	0	0	59	1	0	0	8
B3KW47	115	0.286957	0.0347826	0.208696	0.217391	0.113043	0.0956522	0.0173913	0.026087	226.611	27.4409	438.722	0.182087	3.67174	0	0	0	0	0	0	0	0	0	0	0	0	4	2	0	0	0	0	0	0	0	0	0	1	0	0	0	0	0	0	7	0	0	0	0
B3KWA1	339	0.292035	0.126844	0.179941	0.109145	0.126844	0.103245	0.0560472	0.00589971	211.553	32.7973	448.746	0.110177	3.50319	0	0	0	0	0	0	0	0	0	0	0	0	0	0	0	0	0	1	1	0	0	0	0	7	0	0	0	0	0	0	60	3	0	0	0
B3SHH9	223	0.439462	0.0941704	0.188341	0.0762332	0.0717489	0.0313901	0.0852018	0.0134529	207.977	37.5045	492.704	0.341839	3.24507	0	0	0	0	0	0	0	0	0	0	0	0	0	0	4	0.401786	0.991071	0	0	0.303571	0.566964	0.575893	0	2	0	1	0	0	0	0	26	1	0	0	2
B4DEV8	164	0.396341	0.0731707	0.207317	0.134146	0.0792683	0.0487805	0.0365854	0.0243902	216.772	33.9457	459.11	0.19	3.46805	0	0	0	0	0	0	0	0	0	0	0	0	0	0	1	0.0969697	0.987879	1	1	0	0	0	0	1	0	0	0	0	0	0	15	0	1	0	0
B4DFI2	165	0.418182	0.0848485	0.175758	0.0909091	0.0606061	0.0363636	0.0848485	0.0484848	211.606	31.163	476.485	0.220364	3.30242	0	0	0	0	0	0	0	0	0	0	0	0	0	0	3	0.355422	0.987952	0	0	0.174699	0.433735	0.421687	0	2	0	0	0	0	0	0	13	0	0	1	0
B4DGG1	531	0.327684	0.086629	0.201507	0.111111	0.101695	0.0640301	0.0828625	0.0244821	207.584	37.3635	480.237	0.0938041	3.17725	0	0	0	0	0	0	0	0	0	0	0	0	0	0	1	0.0413534	0.996241	0	0	0.0845865	0.139098	0.445489	0	29	0	0	0	0	0	0	68	0	1	0	0
B4DH59	902	0.235033	0.0665188	0.206208	0.119734	0.230599	0.0643016	0.0421286	0.0354767	218.132	27.9441	452.068	-0.16582	3.46449	20.8426	3.43681	0	0	188	31	0	0	4	1	0	0	15	13	0	0	0	10	1	0.0963455	0.242525	0.614618	0	25	0	1	5	0	0	0	145	0	0	0	9
B4DJY2	109	0.357798	0.100917	0.201835	0.0917431	0.110092	0.0642202	0.0458716	0.0275229	209.69	30.8541	460.578	0.146514	3.30679	0	0	0	0	0	0	0	0	0	0	0	0	0	0	2	0.4	0.981818	0	0	0.136364	0.136364	0	0	4	0	3	0	0	0	0	4	0	0	0	0
B4DL54	471	0.301486	0.101911	0.178344	0.121019	0.116773	0.0488323	0.0849257	0.0467091	212.107	31.503	454.225	0.0886412	3.3741	0	0	0	0	0	0	0	0	0	0	0	0	0	0	0	0	0	0	0	0.0169492	0	0	0	10	0	0	0	0	0	0	66	1	2	0	3
B4DLA0	139	0.122302	0.129496	0.28777	0.143885	0.129496	0.0143885	0.172662	0	203.406	41.3892	492.604	-0.132518	3.02043	24.4604	0	0	0	34	0	0	0	1	0	0	0	2	1	0	0	0	0	0	0.364286	0.75	0.557143	0	0	0	0	0	0	0	0	17	5	0	3	0
B4DLN1	442	0.38914	0.061086	0.174208	0.144796	0.0837104	0.0497738	0.0769231	0.020362	213.961	34.5925	489.817	0.0261312	3.24672	0	6.78733	0	0	0	30	0	0	0	1	0	0	0	0	0	0	0	2	2	0.133183	0.248307	0.205418	0	10	5	0	0	0	0	0	58	0	0	0	0
B4DR74	153	0.333333	0.176471	0.176471	0.117647	0.0261438	0.0915033	0.0522876	0.0261438	215.259	33.517	434.235	0.37268	3.74484	0	0	0	0	0	0	0	0	0	0	0	0	0	0	4	0.519481	0.987013	1	1	0	0	0	0	2	0	0	0	0	0	0	31	0	0	0	0
B4DS77	424	0.254717	0.0707547	0.228774	0.15566	0.0943396	0.0872642	0.0778302	0.0306604	212.943	35.0269	457.703	-0.00481132	3.27483	39.3868	0	0	0	167	0	0	0	2	0	0	0	5	5	1	0.0470588	0.995294	0	0	0.12	0.178824	0.138824	1	5	0	1	0	0	0	0	37	1	0	0	1
B4DSR2	109	0.256881	0.0183486	0.110092	0.165138	0.100917	0.137615	0.201835	0.00917431	201.386	53.1119	507.165	-0.29633	2.70624	100	0	0	0	109	0	0	0	1	0	0	0	2	2	0	0	0	0	0	0.481818	0.945455	0.909091	0	1	0	0	0	0	0	0	14	1	0	0	1
B4DU55	563	0.213144	0.0852575	0.238011	0.230906	0.0834813	0.0301954	0.0692718	0.0497336	222.889	33.7384	449.08	0.00685613	3.53211	0	0	0	0	0	0	0	0	0	0	0	0	0	0	0	0	0	1	1	0	0.0460993	0	0	18	0	15	0	0	0	0	53	2	1	0	3
B4DX44	427	0.175644	0.100703	0.180328	0.255269	0.124122	0.028103	0.0562061	0.0796253	226.033	30.7052	439.159	-0.067541	3.63642	0	0	0	0	0	0	0	0	0	0	0	0	0	0	0	0	0	1	1	0	0	0	0	4	0	7	4	0	0	0	40	3	1	0	1
B4DXG7	233	0.257511	0.124464	0.214592	0.141631	0.0643777	0.0815451	0.0901288	0.0257511	211.127	36.5365	457.279	0.12279	3.39704	0	0	0	0	0	0	0	0	0	0	0	0	0	0	0	0	0	1	1	0.0598291	0.17094	0	1	6	0	0	0	0	0	0	47	4	2	0	0
B4DXQ2	312	0.227564	0.0288462	0.291667	0.173077	0.195513	0.025641	0.0384615	0.0192308	223.534	23.9946	463.708	-0.106538	3.47609	47.7564	36.859	0	0	149	115	0	0	3	1	0	0	6	3	0	0	0	0	0	0.0926518	0.255591	0.984026	0	0	0	0	0	0	0	0	19	0	0	1	0
B4DXR9	585	0.174359	0.102564	0.205128	0.241026	0.117949	0.0307692	0.0683761	0.0598291	224.287	30.021	447.479	-0.0506154	3.59518	0	0	0	0	0	0	0	0	0	0	0	0	0	0	0	0	0	1	1	0	0	0	0	9	1	5	6	0	0	0	75	2	2	0	1
B4DYI2	1134	0.253968	0.047619	0.283951	0.141975	0.0873016	0.110229	0.0555556	0.0194004	212.85	36.7215	466.073	0.0180335	3.23127	55.1146	0	0	0	625	0	0	0	6	0	0	0	26	19	1	0.0193833	0.998238	0	0	0.0678414	0.229956	0.459912	0	14	0	9	0	0	0	0	149	5	1	2	0
B4DZS4	312	0.323718	0.0576923	0.246795	0.0929487	0.137821	0.0801282	0.0384615	0.0224359	212.025	27.3295	466.753	0.113494	3.28994	11.5385	0	0	0	36	0	0	0	1	0	0	0	2	1	0	0	0	0	0	0.0638978	0.15016	0.191693	0	2	0	0	0	0	0	0	49	1	0	0	0
B4E171	279	0.318996	0.114695	0.225806	0.09319	0.0967742	0.0250896	0.0824373	0.0430108	210.926	31.6785	459.76	0.18552	3.34333	0	0	0	0	0	0	0	0	0	0	0	0	0	0	3	0.246429	0.992857	1	1	0.0428571	0.142857	0.4	0	7	0	0	0	0	0	0	23	2	1	1	0
B4E1Z4	1266	0.267773	0.0821485	0.225118	0.13981	0.116114	0.0529226	0.0837283	0.0323855	213.556	31.8423	462.39	0.00042654	3.31792	0	0	0	0	0	0	0	0	0	0	0	0	3	0	0	0	0	9	3	0.00947119	0.0299921	0	1	48	0	0	0	0	0	0	202	0	0	0	1
B4E2M5	251	0.314741	0.0517928	0.187251	0.191235	0.10757	0.059761	0.059761	0.0278884	216.624	33.7179	463.797	-0.00454183	3.33084	5.9761	0	0	0	15	0	0	0	1	0	0	0	3	1	0	0	0	0	0	0	0.0873016	0	0	3	0	1	0	0	0	0	26	0	0	0	1
B5MCH6	92	0.217391	0.119565	0.184783	0.173913	0.108696	0.076087	0.0543478	0.0543478	220.631	33.7055	427.813	0.052967	3.68451	0	0	0	0	0	0	0	0	0	0	0	0	0	0	0	0	0	0	0	0	0	0	0	2	0	0	0	0	0	0	12	3	0	0	0
B5MCK2	37	0.297297	0.108108	0.27027	0.108108	0.0810811	0.0810811	0.0540541	0	204.364	36.1378	453.514	0.00594595	3.25459	0	0	0	0	0	0	0	0	0	0	0	0	1	1	0	0	0	0	0	0	0	0	0	0	0	0	0	0	0	0	0	0	1	0	0
B5MCM0	375	0.285333	0.0986667	0.253333	0.133333	0.0826667	0.088	0.0453333	0.0133333	212.443	36.2749	460.808	0.0451733	3.37021	14.6667	0	0	0	55	0	0	0	1	0	0	0	2	2	0	0	0	0	0	0.18617	0.406915	0.409574	0	9	0	0	0	0	0	0	18	2	0	0	0
B5MCN3	397	0.304786	0.0982368	0.193955	0.138539	0.125945	0.0478589	0.0730479	0.0176322	217.771	31.9232	463.481	0.0777582	3.53171	0	0	0	0	0	0	0	0	0	0	0	0	0	0	0	0	0	2	2	0.0376884	0.103015	0.301508	0	12	0	4	0	0	0	0	52	4	1	0	1
B5MCY1	1934	0.31334	0.105481	0.220269	0.132885	0.118925	0.0449845	0.0377456	0.0263702	218.403	26.966	457.778	0.128697	3.56207	0	0	0	0	0	0	0	0	0	0	0	0	1	1	0	0	0	8	1	0.0268734	0.0459948	0.175194	0	22	0	1	0	0	0	0	334	2	3	0	0
B5MD39	225	0.324444	0.0888889	0.257778	0.0933333	0.0844444	0.0622222	0.08	0.00888889	204.242	35.496	476.187	0.0652889	3.08284	0	0	0	0	0	0	0	0	0	0	0	0	0	0	0	0	0	0	0	0	0.137168	0	0	12	0	0	0	0	0	0	39	2	1	0	0
B5ME19	914	0.28337	0.0678337	0.200219	0.175055	0.181619	0.0284464	0.0503282	0.0131291	221.374	29.2672	459.01	-0.0596061	3.53619	14.8796	0	0	0	136	0	0	0	2	0	0	0	9	3	0	0	0	1	1	0.145355	0.26776	0.271038	0	8	6	40	30	5	4	0	121	1	1	2	0
B6A8C7	271	0.321033	0.0885609	0.228782	0.107011	0.0774908	0.0738007	0.0811808	0.0221402	209.695	34.7959	483.059	0.111624	3.22255	0	0	0	0	0	0	0	0	0	0	0	0	0	0	1	0.0698529	0.992647	2	1	0	0	0	1	8	0	1	0	0	0	0	4	2	0	0	1
B6SEH8	477	0.291405	0.0964361	0.255765	0.109015	0.0587002	0.081761	0.067086	0.0398323	209.94	32.1164	459.017	0.212013	3.29128	0	0	0	0	0	0	0	0	0	0	0	0	0	0	1	0.0460251	0.995816	0	0	0.108787	0.0627615	0.0627615	1	21	0	0	0	0	0	0	36	3	0	0	0
B6SEH9	535	0.28785	0.100935	0.246729	0.117757	0.0635514	0.0766355	0.0672897	0.0392523	211.07	32.6671	456.222	0.193477	3.33224	0	0	0	0	0	0	0	0	0	0	0	0	0	0	2	0.0820896	0.996269	0	0	0.0597015	0.0690299	0	1	22	0	0	0	0	0	0	26	4	2	0	0
B7U540	433	0.339492	0.0946882	0.170901	0.138568	0.13164	0.0323326	0.0692841	0.0230947	214.869	35.1896	458.102	0.0555196	3.43455	0	0	0	0	0	0	0	0	0	0	0	0	2	1	2	0.124424	0.995392	0	0	0.062212	0.142857	0.115207	0	7	0	1	0	0	0	0	58	2	0	0	0
B7Z1M9	353	0.280453	0.0481586	0.150142	0.167139	0.0736544	0.147309	0.107649	0.0254958	210.487	47.9346	487.745	-0.046119	3.09479	37.3938	0	0	0	132	0	0	0	2	0	0	0	7	4	0	0	0	1	1	0.251412	0.824859	0.966102	0	12	0	7	0	0	0	0	62	0	0	0	0
B7Z264	791	0.2933	0.0733249	0.195954	0.142857	0.139064	0.0606827	0.0872314	0.00758534	213.63	32.5877	468.053	-6.32111e-05	3.3187	4.04551	2.65487	0	0	32	21	0	0	1	1	0	0	6	1	0	0	0	5	3	0.0265152	0.0492424	0.114899	0	25	0	0	0	0	0	0	98	0	0	2	0
B7Z368	130	0.192308	0.0307692	0.184615	0.176923	0.0769231	0.115385	0.153846	0.0692308	210.571	46.7792	473.138	-0.191308	2.95677	41.5385	0	0	0	54	0	0	0	1	0	0	0	1	1	0	0	0	0	0	0.412214	0.755725	0.854962	0	3	0	0	0	0	0	0	12	0	0	0	0
B7Z3J9	87	0.264368	0.114943	0.16092	0.16092	0.091954	0.091954	0.091954	0.0229885	215.653	45.631	455.483	0.0449425	3.51575	0	0	0	0	0	0	0	0	0	0	0	0	2	0	0	0	0	0	0	0	0.443182	0.613636	0	3	0	0	0	0	0	0	12	4	2	0	1
B7Z6K7	855	0.156725	0.0877193	0.222222	0.246784	0.100585	0.0280702	0.0900585	0.0678363	220.171	36.0958	446.616	-0.115509	3.43154	0	0	0	0	0	0	0	0	0	0	0	0	3	0	0	0	0	1	1	0.0140187	0	0.254673	0	55	0	18	3	1	0	0	77	0	0	0	9
B7Z8K6	153	0.294118	0.0718954	0.261438	0.183007	0.0915033	0.0522876	0.0261438	0.0196078	217.51	26.1908	470.033	0.0650327	3.38588	20.915	0	0	0	32	0	0	0	1	0	0	0	1	0	1	0.142857	0.987013	0	0	0	0.214286	0.532468	0	5	0	0	0	0	0	0	20	0	0	0	1
B7ZAQ6	455	0.38022	0.158242	0.204396	0.107692	0.0659341	0.021978	0.0505495	0.010989	217.001	32.0248	447.429	0.421868	3.74086	0	0	0	0	0	0	0	0	0	0	0	0	0	0	9	0.392544	0.995614	0	0	0	0.0964912	0.234649	0	3	28	0	4	0	1	0	73	0	0	0	2
B7ZBB8	358	0.307263	0.0530726	0.159218	0.106145	0.136872	0.114525	0.0865922	0.0363128	206.377	38.1729	487.846	-0.193715	3.00927	20.3911	0	0	0	73	0	0	0	1	0	0	0	7	5	0	0	0	1	1	0.309192	0.649025	0.846797	0	13	0	5	0	0	0	0	40	0	0	1	0
B7ZBF8	172	0.197674	0.0872093	0.343023	0.104651	0.139535	0.0581395	0.0465116	0.0232558	210.477	32.575	456.041	0.000348837	3.2732	40.6977	0	0	0	70	0	0	0	1	0	0	0	4	4	0	0	0	0	0	0.33526	0.508671	0.560694	0	1	0	0	0	0	0	0	16	1	0	0	0
B7ZC32	967	0.311272	0.0703206	0.233713	0.146846	0.11272	0.0444674	0.0641158	0.016546	216.09	33.0371	468.912	0.0556153	3.37633	0	0	0	0	0	0	0	0	0	0	0	0	8	1	0	0	0	2	2	0.0671488	0.0506198	0.181818	0	25	0	2	0	0	0	0	131	2	1	0	0
B7ZCA0	1306	0.269525	0.0612557	0.219755	0.160031	0.109495	0.0796325	0.0872894	0.0130168	213.306	37.6685	470.469	0.0254671	3.27154	41.4242	2.90965	0	0	541	38	0	0	7	1	0	0	17	13	0	0	0	2	2	0.146136	0.417751	0.580719	0	14	0	0	0	0	0	0	170	0	0	0	0
B7ZL25	1061	0.325165	0.0782281	0.175306	0.138549	0.110273	0.0838831	0.0697455	0.0188501	213.488	38.1779	465.46	0.0253817	3.3786	1.88501	2.82752	0	0	20	30	0	0	1	1	0	0	6	3	0	0	0	2	2	0.0451977	0.208098	0.329567	0	35	0	0	0	0	0	0	152	1	0	0	0
B7ZLF3	203	0.20197	0.0591133	0.167488	0.221675	0.0837438	0.08867	0.118227	0.0591133	215.09	45.2325	449.158	-0.150099	3.24837	0	0	0	0	0	0	0	0	0	0	0	0	4	1	0	0	0	5	1	0.235294	0.117647	0	0	11	0	0	0	0	0	0	6	0	0	0	1
B7ZW38	293	0.259386	0.0477816	0.221843	0.167235	0.174061	0.0307167	0.0887372	0.0102389	213.122	28.9051	488.205	-0.21116	3.14304	41.6382	5.11945	0	0	122	15	0	0	2	1	0	0	6	4	0	0	0	1	1	0.241497	0.452381	0.513605	0	5	0	6	10	1	4	0	24	0	0	0	0
B8PRF2	234	0.273504	0.0769231	0.260684	0.136752	0.0854701	0.0384615	0.0897436	0.0384615	214.783	36.3376	466.017	0.120897	3.32201	0	0	0	0	0	0	0	0	0	0	0	0	1	0	0	0	0	0	0	0.0510638	0	0	1	13	0	0	0	0	0	0	18	3	0	2	0
B8ZZ34	397	0.284635	0.0629723	0.156171	0.151134	0.0604534	0.148615	0.105793	0.0302267	207.584	46.2018	484.71	-0.129723	3.03035	51.6373	0	0	0	205	0	0	0	3	0	0	0	8	7	1	0.0502513	0.994975	0	0	0.505025	0.721106	0.869347	1	6	0	3	1	1	0	0	53	3	1	1	1
B8ZZA7	146	0.342466	0.0821918	0.232877	0.130137	0.10274	0.0410959	0.0410959	0.0273973	219.153	27.2192	451.527	0.203288	3.57911	0	0	0	0	0	0	0	0	0	0	0	0	0	0	0	0	0	0	0	0	0	0	0	4	0	0	0	0	0	0	0	2	1	0	0
B8ZZF3	427	0.252927	0.0210773	0.234192	0.168618	0.100703	0.12178	0.0819672	0.0187354	210.885	39.1663	487.77	-0.107026	3.02754	69.0867	0	0	0	295	0	0	0	2	0	0	0	7	7	0	0	0	1	1	0.0724299	0.523364	0.885514	0	1	0	0	0	0	0	0	65	3	3	0	0
B9A012	1178	0.310696	0.0831919	0.187606	0.179117	0.131579	0.0339559	0.0594228	0.0144312	221.242	33.4748	455.789	0.0386418	3.57818	0.254669	0	0	0.339559	3	0	0	4	0	0	0	0	5	5	0	0	0	2	2	0.0695505	0.169635	0.253605	0	20	0	0	0	0	0	0	64	1	0	0	0
B9A014	251	0.262948	0.12749	0.223108	0.139442	0.10757	0.0438247	0.0517928	0.0438247	220.744	32.1299	447.347	0.0811952	3.65275	0	0	0	0	0	0	0	0	0	0	0	0	0	0	0	0	0	0	0	0.0357143	0	0	0	3	0	0	0	0	0	0	45	1	0	0	0
B9A019	99	0.363636	0.111111	0.181818	0.111111	0.0909091	0.0707071	0.040404	0.030303	211.413	34.2343	419.515	0.363333	3.59131	0	0	0	0	0	0	0	0	0	0	0	0	0	0	0	0	0	1	1	0	0	0	0	2	0	0	0	0	0	0	0	1	1	1	0
B9A030	160	0.30625	0.075	0.21875	0.075	0.10625	0.10625	0.06875	0.04375	207.241	32.1725	441.769	0.198625	3.26556	0	0	0	0	0	0	0	0	0	0	0	0	0	0	0	0	0	1	1	0.111801	0.186335	0	0	5	0	0	0	0	0	0	0	1	0	0	0
B9A039	149	0.281879	0.0805369	0.208054	0.100671	0.134228	0.0872483	0.0671141	0.0402685	207.498	32.7389	434.134	0.102483	3.28483	0	0	0	0	0	0	0	0	0	0	0	0	0	0	0	0	0	1	1	0	0	0	0	5	0	0	0	0	0	0	0	2	3	2	0
B9A064	214	0.261682	0.0700935	0.257009	0.116822	0.0747664	0.107477	0.0841121	0.0280374	208.447	36.6575	480.196	0.00182243	3.13285	0	0	0	0	0	0	0	0	0	0	0	0	3	1	0	0	0	1	1	0.0744186	0.381395	0.311628	0	8	15	6	0	0	0	0	29	1	1	0	1
B9A6J9	549	0.260474	0.0819672	0.187614	0.169399	0.114754	0.0856102	0.0765027	0.0236794	217.185	38.1264	454.211	-0.0460838	3.45455	18.3971	0	0	0	101	0	0	0	1	0	0	0	7	5	0	0	0	1	1	0.0527273	0.103636	0.181818	0	14	0	0	0	0	0	0	81	4	1	0	1
B9EJG8	249	0.389558	0.128514	0.200803	0.0843373	0.0763052	0.0361446	0.0562249	0.0281124	210.78	31.5157	463.349	0.260723	3.4404	0	0	0	0	0	0	0	0	0	0	0	0	0	0	6	0.496	0.992	0	0	0.152	0	0	0	6	0	1	0	0	0	0	25	5	2	2	2
B9ZVM9	353	0.243626	0.0254958	0.246459	0.167139	0.13881	0.0963173	0.0764873	0.00566572	212.038	38.6844	477.688	-0.179008	3.11462	88.9518	0	0	0	314	0	0	0	2	0	0	0	8	8	0	0	0	0	0	0.0819209	0.310734	0.451977	0	0	5	0	0	0	0	0	37	0	0	0	2
C4AMC7	463	0.293737	0.0453564	0.209503	0.12311	0.131749	0.114471	0.0799136	0.00215983	209.783	33.7523	480.916	-0.0942765	3.13773	36.5011	8.63931	0	0	169	40	0	0	2	1	0	0	10	6	0	0	0	1	1	0.219828	0.439655	0.510776	0	4	2	0	0	0	0	0	80	1	0	0	0
C4P0D8	188	0.260638	0.0797872	0.228723	0.196809	0.138298	0.0159574	0.0797872	0	219.289	35.7074	459.697	-0.0128191	3.48144	15.9574	0	0	0	30	0	0	0	1	0	0	0	1	1	0	0	0	0	0	0.042328	0	0	0	0	0	0	0	0	0	0	25	0	1	0	3
C9IYK1	514	0.274319	0.0875486	0.233463	0.169261	0.103113	0.0583658	0.0525292	0.0214008	219.661	33.4774	451.442	0.110292	3.55235	27.821	4.0856	0	0	143	21	0	0	2	1	0	0	7	6	3	0.128155	0.996117	2	2	0	0.184466	0.108738	1	5	0	0	0	0	0	0	61	2	0	0	1
C9IYR8	30	0.333333	0.166667	0.1	0.133333	0.0666667	0.133333	0.0666667	0	207.017	37.4233	459.567	0.352667	3.46767	0	0	0	0	0	0	0	0	0	0	0	0	0	0	0	0	0	0	0	0	0	0	0	1	0	0	0	0	0	0	4	2	0	1	0
C9IZI1	132	0.386364	0.189394	0.19697	0.0454545	0.0606061	0.0606061	0.0454545	0.0151515	210.729	29.622	450.038	0.419167	3.67303	0	0	0	0	0	0	0	0	0	0	0	0	0	0	4	0.56391	0.984962	0	0	0.120301	0.240602	0	0	0	0	0	0	0	0	0	36	0	1	1	0
C9IZR7	144	0.256944	0.125	0.222222	0.173611	0.104167	0.0416667	0.0555556	0.0208333	222.633	35.2153	439.625	0.0267361	3.75549	0	0	0	0	0	0	0	0	0	0	0	0	0	0	0	0	0	0	0	0	0	0	0	4	0	0	0	0	0	0	0	2	4	0	0
C9J069	976	0.265369	0.0758197	0.157787	0.152664	0.108607	0.140369	0.0758197	0.0235656	211.162	44.9343	470.062	-0.11625	3.21838	50.4098	0	0	0	492	0	0	0	5	0	0	0	20	13	0	0	0	0	0	0.195496	0.539406	0.894575	0	16	0	13	0	0	0	0	170	1	0	0	0
C9J0F0	613	0.292007	0.0391517	0.337684	0.109299	0.096248	0.0717781	0.0440457	0.00978793	212.633	30.9393	453.406	0.0325938	3.26741	37.3573	5.87276	0	0	229	36	0	0	5	1	0	0	10	9	0	0	0	1	1	0.285016	0.351792	0.441368	0	5	0	0	0	0	0	0	85	0	0	1	0
C9J0U3	31	0.225806	0.0645161	0.16129	0.258065	0.193548	0.0322581	0.0645161	0	230.205	23.6677	454.968	-0.0670968	3.75226	0	0	0	0	0	0	0	0	0	0	0	0	1	1	0	0	0	0	0	0	0	0	0	0	0	0	0	0	0	0	5	1	0	0	0
C9J1D1	45	0.266667	0.0888889	0.222222	0.2	0.0222222	0.0666667	0.0888889	0.0444444	219.475	28.7978	459.756	0.282889	3.48956	0	0	0	0	0	0	0	0	0	0	0	0	0	0	0	0	0	0	0	0	0	0	0	0	0	0	0	0	0	0	38	2	3	0	0
C9J1S8	452	0.272124	0.090708	0.214602	0.179204	0.10177	0.0464602	0.0442478	0.050885	221.669	33.7456	434.502	0.116128	3.62062	0	0	0	0	0	0	0	0	0	0	0	0	0	0	0	0	0	1	1	0.0242826	0	0	0	17	0	1	0	0	0	0	73	0	0	0	1
C9J1V9	151	0.364238	0.0993377	0.231788	0.125828	0.0993377	0.013245	0.0662252	0	216.202	26.9947	484.43	0.219934	3.46894	0	0	0	0	0	0	0	0	0	0	0	0	0	0	0	0	0	1	1	0.118421	0.171053	0	0	3	0	0	0	0	0	0	18	0	0	0	0
C9J202	215	0.306977	0.0883721	0.186047	0.134884	0.134884	0.0604651	0.055814	0.0325581	214.056	34.3009	463.656	0.0740465	3.4006	0	0	0	0	0	0	0	0	0	0	0	0	0	0	0	0	0	0	0	0	0.162037	0	0	7	0	2	0	0	0	0	24	0	0	0	0
C9J225	147	0.360544	0.0544218	0.204082	0.136054	0.176871	0.0204082	0.0340136	0.0136054	221.841	25.2667	442.891	0.137279	3.63395	0	14.2857	0	0	0	21	0	0	0	1	0	0	0	0	0	0	0	0	0	0.0405405	0.22973	0	0	0	0	0	0	0	0	0	0	3	2	0	0
C9J2C7	533	0.242026	0.0844278	0.275797	0.135084	0.129456	0.0712946	0.0487805	0.0131332	215.265	32.6908	462.493	0.00718574	3.38912	41.2758	0	0	0	220	0	0	0	1	0	0	0	9	7	0	0	0	0	0	0.14794	0.189139	0.335206	0	2	0	0	0	0	0	0	79	4	0	2	0
C9J2P7	530	0.286792	0.0679245	0.239623	0.167925	0.10566	0.0471698	0.0528302	0.0320755	216.503	33.0691	455.917	0.00962264	3.38625	20.1887	0	0	0	107	0	0	0	2	0	0	0	5	3	0	0	0	1	1	0.0414313	0.047081	0.103578	0	14	0	0	0	0	0	0	67	3	1	0	1
C9J302	202	0.183168	0.123762	0.247525	0.163366	0.108911	0.0643564	0.0693069	0.039604	214.758	34.6515	448.619	0.00574257	3.45134	0	0	0	0	0	0	0	0	0	0	0	0	0	0	0	0	0	0	0	0	0	0	0	5	0	5	0	0	0	0	40	0	0	0	0
C9J3I9	102	0.362745	0.0294118	0.215686	0.186275	0.156863	0.0294118	0.00980392	0.00980392	225.04	24.2137	471.059	0.118333	3.53961	0	0	0	0	0	0	0	0	0	0	0	0	0	0	0	0	0	0	0	0	0.398058	0	0	2	0	0	0	0	1	0	16	0	0	0	1
C9J3R0	272	0.319853	0.0367647	0.183824	0.161765	0.113971	0.0477941	0.117647	0.0183824	212.291	35.532	486.415	-0.0832353	3.14849	18.3824	0	0	0	50	0	0	0	1	0	0	0	4	4	0	0	0	0	0	0.161172	0.120879	0	0	10	0	0	0	0	0	0	30	1	0	0	0
C9J3V5	150	0.266667	0.0533333	0.233333	0.18	0.106667	0.0866667	0.06	0.0133333	218.173	44.5113	461.647	-0.1134	3.3914	0	0	0	0	0	0	0	0	0	0	0	0	3	3	0	0	0	0	0	0.0728477	0.211921	0	0	5	0	0	0	0	0	0	17	0	0	0	1
C9J442	243	0.271605	0.0699588	0.271605	0.131687	0.0617284	0.090535	0.0452675	0.0576132	217.017	37.8671	438.449	0.109959	3.45461	0	0	0	0	0	0	0	0	0	0	0	0	0	0	0	0	0	0	0	0	0.17623	0.192623	0	9	0	1	0	0	0	0	33	3	2	0	0
C9J4A7	227	0.317181	0.0572687	0.14978	0.198238	0.140969	0.0220264	0.092511	0.0220264	220.807	33.5907	479.317	-0.0728634	3.43414	0	0	0	0	0	0	0	0	0	0	0	0	0	0	0	0	0	2	2	0.0745614	0	0	0	4	0	0	0	0	0	0	21	0	0	0	0
C9J5C5	67	0.38806	0.0298507	0.19403	0.0895522	0.119403	0.0447761	0.104478	0.0298507	208.393	34.1313	509.119	0.0491045	2.98627	0	0	0	0	0	0	0	0	0	0	0	0	0	0	0	0	0	1	1	0	0	0	0	3	0	0	0	0	0	0	0	1	0	0	0
C9J5E3	248	0.346774	0.0564516	0.201613	0.129032	0.104839	0.0564516	0.0887097	0.016129	210.487	35.694	469.008	0.000887097	3.17282	0	0	0	0	0	0	0	0	0	0	0	0	0	0	0	0	0	2	2	0	0	0	0	9	0	0	0	0	0	0	10	4	0	1	0
C9J5P8	38	0.368421	0	0.263158	0.157895	0.105263	0.0526316	0.0526316	0	209.641	24.7263	520.237	-0.266579	2.86868	97.3684	0	0	0	37	0	0	0	1	0	0	0	1	1	0	0	0	0	0	0	0	0	0	0	0	0	0	0	0	0	11	2	3	0	0
C9J5T4	224	0.290179	0.0357143	0.392857	0.09375	0.0625	0.0669643	0.0401786	0.0178571	215.643	28.4839	434.812	0.114777	3.4042	15.1786	14.2857	0	0	34	32	0	0	1	1	0	0	3	2	0	0	0	1	1	0.52	0.568889	0.568889	0	0	0	0	0	0	0	0	25	0	0	0	0
C9J6K1	198	0.343434	0.0454545	0.166667	0.156566	0.131313	0.0757576	0.0555556	0.0252525	219.326	38.5268	456.389	0.0431313	3.45773	0	0	0	0	0	0	0	0	0	0	0	0	1	0	0	0	0	0	0	0.140704	0.211055	0.341709	0	12	0	2	0	0	0	0	36	3	0	0	1
C9J798	803	0.308842	0.0722291	0.199253	0.158157	0.127024	0.0535492	0.0585305	0.0224159	217.729	34.8633	470.218	-0.00420922	3.42529	0	0	0	0	0	0	0	0	0	0	0	0	3	2	0	0	0	4	3	0.0149254	0.210199	0.268657	0	29	0	13	4	0	0	0	147	0	0	0	2
C9J7I0	137	0.262774	0.0729927	0.277372	0.0948905	0.175182	0.0656934	0.0437956	0.00729927	209.161	28.9474	467.38	0.0735036	3.24358	56.2044	0	0	0	77	0	0	0	1	0	0	0	3	2	0	0	0	1	1	0.0869565	0	0	0	2	0	0	0	0	0	0	11	2	2	0	4
C9J8F0	131	0.351145	0.0916031	0.137405	0.145038	0.137405	0.0229008	0.0839695	0.0305344	210.003	31.3023	460.237	0.0121374	3.28366	0	0	0	0	0	0	0	0	0	0	0	0	0	0	0	0	0	1	1	0.0909091	0.0909091	0	0	2	0	0	0	0	0	0	19	1	0	1	0
C9J8V2	166	0.331325	0.108434	0.216867	0.138554	0.0843373	0.0361446	0.0662651	0.0180723	217.322	28.7651	473.675	0.19747	3.51114	0	0	0	0	0	0	0	0	0	0	0	0	0	0	0	0	0	0	0	0	0	0	0	2	0	0	0	0	0	0	0	0	0	0	0
C9J9N5	199	0.432161	0.0351759	0.155779	0.135678	0.0753769	0.0653266	0.0854271	0.0150754	213.103	31.2191	482.111	0.252111	3.24508	0	0	0	0	0	0	0	0	0	0	0	0	0	0	3	0.32	0.99	0	0	0.205	0.365	0.59	0	3	0	0	0	0	0	0	50	2	2	0	0
C9JBD0	128	0.34375	0.117188	0.179688	0.15625	0.109375	0.046875	0.03125	0.015625	221.13	37.5781	456.602	-0.0349219	3.67172	0	0	0	0	0	0	0	0	0	0	0	0	0	0	0	0	0	1	1	0	0	0	0	5	0	0	0	0	0	0	19	1	1	0	0
C9JC47	383	0.250653	0.0652742	0.232376	0.182768	0.0626632	0.104439	0.0861619	0.0156658	216.865	43.2423	453.298	-0.0441514	3.38854	35.7702	0	0	0	137	0	0	0	3	0	0	0	9	8	0	0	0	0	0	0.174479	0.257812	0.356771	0	3	0	4	0	0	0	0	33	2	1	1	0
C9JCJ5	164	0.420732	0.0731707	0.140244	0.097561	0.0731707	0.0609756	0.109756	0.0243902	202.085	39.6738	514.811	0.00957317	2.92299	0	0	0	0	0	0	0	0	0	0	0	0	0	0	0	0	0	2	2	0.206061	0.6	0.49697	1	6	0	0	0	0	0	0	20	1	0	0	0
C9JCN9	74	0.364865	0.027027	0.202703	0.135135	0.175676	0.027027	0.0675676	0	217.528	29.2351	461.243	0.0077027	3.38851	0	68.9189	0	0	0	51	0	0	0	1	0	0	1	1	0	0	0	0	0	0	0	0	0	0	0	0	0	0	0	0	6	1	1	0	1
C9JDG7	156	0.294872	0.0833333	0.288462	0.134615	0.108974	0.0512821	0.0384615	0	219.017	32.741	457.904	0.191218	3.57051	0	0	0	0	0	0	0	0	0	0	0	0	1	0	0	0	0	0	0	0	0	0	0	6	0	0	0	0	0	0	22	0	0	0	0
C9JDP6	229	0.39738	0.104803	0.152838	0.0873362	0.0917031	0.0480349	0.0829694	0.0349345	210.454	36.0371	471.166	0.276681	3.38965	0	0	0	0	0	0	0	0	0	0	0	0	0	0	4	0.4	0.991304	0	0	0.169565	0.126087	0	0	3	0	0	0	0	0	0	18	0	0	0	0
C9JDV5	145	0.303448	0.0758621	0.282759	0.137931	0.062069	0.0827586	0.0344828	0.0206897	214.661	33.8317	453.572	0.245103	3.3769	0	0	0	0	0	0	0	0	0	0	0	0	1	0	0	0	0	0	0	0	0	0	0	5	0	1	0	0	0	0	26	4	4	0	0
C9JE40	543	0.314917	0.0718232	0.217311	0.116022	0.138122	0.0847145	0.0423573	0.014733	215.06	31.2112	457.812	0.0646225	3.44869	12.7072	3.8674	0	0	69	21	0	0	3	1	0	0	5	3	0	0	0	0	0	0.200368	0.426471	0.597426	0	11	0	0	0	0	0	0	101	1	0	0	4
C9JFH1	90	0.333333	0.0777778	0.155556	0.188889	0.177778	0.0222222	0.0333333	0.0111111	221.376	35.9311	460.978	-0.008	3.57422	0	0	0	0	0	0	0	0	0	0	0	0	0	0	0	0	0	1	1	0	0	0	0	1	0	0	0	0	0	0	0	1	2	0	0
C9JFL3	82	0.0121951	0	0	0.195122	0.0121951	0.390244	0.304878	0.0853659	180.853	50.7183	420.805	-0.148659	2.26744	74.3902	0	0	0	61	0	0	0	1	0	0	0	0	0	0	0	0	0	0	0.963855	0.963855	0.963855	0	4	0	0	0	0	0	0	6	1	1	0	0
C9JG80	1138	0.258348	0.0289982	0.217047	0.18717	0.0966608	0.167838	0.0289982	0.0149385	217.988	38.8398	451.792	-0.00297891	3.36257	62.1265	0	0	0	707	0	0	0	4	0	0	0	18	12	1	0.0210711	0.998244	0	0	0.170325	0.261633	0.861282	0	3	0	1	0	0	0	0	231	3	0	0	0
C9JGS4	45	0.333333	0.0666667	0.111111	0.222222	0.111111	0.0666667	0.0888889	0	218.361	29.1956	466.578	0.0153333	3.44822	0	0	0	0	0	0	0	0	0	0	0	0	0	0	0	0	0	0	0	0	0	0	0	2	0	0	0	0	0	0	54	1	2	1	0
C9JH25	899	0.332592	0.0634038	0.183537	0.0823137	0.0756396	0.123471	0.114572	0.0244716	200.855	41.4271	506.102	0.121535	2.89556	16.7964	0	0	0	151	0	0	0	4	0	0	0	14	10	7	0.148889	0.997778	0	0	0.346667	0.821111	0.907778	1	22	0	4	1	0	0	0	144	5	1	0	4
C9JHL2	118	0.279661	0.0847458	0.322034	0.110169	0.127119	0.0423729	0.0338983	0	214.288	33.089	451.136	0.121949	3.44034	27.1186	0	0	0	32	0	0	0	1	0	0	0	2	2	0	0	0	1	1	0	0	0	0	5	0	0	0	0	0	0	21	0	2	0	0
C9JI98	176	0.443182	0.0511364	0.125	0.119318	0.0511364	0.0909091	0.107955	0.0113636	203.675	47.4256	521.881	-0.039375	2.88085	0	0	0	0	0	0	0	0	0	0	0	0	1	1	2	0.248588	0.988701	0	0	0.559322	0.79661	0.983051	0	4	0	3	0	0	0	0	22	1	0	0	0
C9JJ35	58	0.189655	0.103448	0.206897	0.224138	0.103448	0.0344828	0.103448	0.0344828	220.181	32.2138	443.69	0.0398276	3.53655	0	0	0	0	0	0	0	0	0	0	0	0	1	0	0	0	0	1	1	0	0	0	0	1	0	0	0	0	0	0	0	0	0	0	0
C9JJ37	291	0.402062	0.0652921	0.127148	0.140893	0.127148	0.0549828	0.04811	0.0343643	217.14	37.9495	484.918	-0.0640893	3.37814	0	0	0	0	0	0	0	0	0	0	0	0	1	0	0	0	0	2	2	0.222603	0.60274	0.886986	0	5	0	0	0	0	0	0	48	1	1	0	1
C9JJH3	530	0.284906	0.0679245	0.237736	0.167925	0.10566	0.0528302	0.0509434	0.0320755	217.266	33.7287	453.051	-0.00958491	3.41062	20.1887	0	0	0	107	0	0	0	2	0	0	0	6	3	0	0	0	1	1	0.0414313	0.105461	0.114878	0	14	0	0	0	0	0	0	66	3	2	0	1
C9JJY6	13	0.461538	0.153846	0.153846	0.0769231	0.0769231	0.0769231	0	0	218.908	21.3231	428.615	0.497692	3.98462	0	0	0	0	0	0	0	0	0	0	0	0	0	0	0	0	0	0	0	0	0	0	0	0	0	0	0	0	0	0	23	0	0	1	0
C9JKR8	224	0.258929	0.0491071	0.174107	0.214286	0.183036	0.0580357	0.0446429	0.0178571	226.305	34.8558	455.268	-0.172455	3.59737	25.4464	0	0	0	57	0	0	0	1	0	0	0	4	1	0	0	0	1	1	0.328889	0.568889	0.626667	0	2	0	0	0	0	0	0	23	1	0	0	0
C9JL77	41	0.414634	0.0731707	0.170732	0.170732	0.097561	0	0.0487805	0.0243902	222.556	27.0073	453.488	0.108049	3.56268	0	0	0	0	0	0	0	0	0	0	0	0	0	0	0	0	0	0	0	0	0	0	0	0	0	0	0	0	0	0	0	2	0	2	0
C9JL84	531	0.282486	0.0847458	0.290019	0.116761	0.0772128	0.0696798	0.0508475	0.0282486	211.349	34.5853	473.166	0.147326	3.25463	27.4953	0	0	0	146	0	0	0	3	0	0	0	6	3	0	0	0	0	0	0.0225564	0.404135	0.396617	1	5	0	8	0	0	0	0	91	3	1	1	1
C9JLJ4	530	0.288679	0.0679245	0.239623	0.164151	0.10566	0.0490566	0.0528302	0.0320755	216.574	33.1428	456.191	0.00381132	3.389	19.434	0	0	0	103	0	0	0	2	0	0	0	5	3	0	0	0	1	1	0.0357815	0.0903955	0	0	10	0	0	0	0	0	0	69	3	1	0	1
C9JLR9	678	0.249263	0.0412979	0.129794	0.163717	0.156342	0.106195	0.131268	0.0221239	210.005	43.4779	480.562	-0.209558	3.09295	61.7994	0	0	0	419	0	0	0	4	0	0	0	13	12	0	0	0	0	0	0.369661	0.541973	0.699558	0	9	0	4	0	3	0	0	98	1	0	0	3
C9JLW8	97	0.216495	0.0721649	0.247423	0.175258	0.134021	0.0927835	0.0618557	0	217.995	37.3691	474.443	-0.148144	3.39103	31.9588	0	0	0	31	0	0	0	1	0	0	0	3	2	0	0	0	0	0	0.102041	0.5	0	0	0	0	11	0	0	2	0	18	3	2	1	5
C9JM51	21	0.285714	0.142857	0.190476	0.190476	0.0952381	0.047619	0	0.047619	217.213	35.1714	404.667	0.152857	3.74048	0	0	0	0	0	0	0	0	0	0	0	0	0	0	0	0	0	0	0	0	0	0	0	0	0	0	0	0	0	0	4	0	0	0	0
C9JMB8	243	0.312757	0.0946502	0.1893	0.18107	0.111111	0.0493827	0.0534979	0.00823045	221.666	34.384	469.737	0.126214	3.61794	0	0	0	0	0	0	0	0	0	0	0	0	0	0	0	0	0	0	0	0.0614754	0.131148	0.831967	0	3	0	0	0	0	0	0	138	3	2	0	0
C9JMG7	57	0.280702	0.105263	0.22807	0.105263	0.122807	0.0175439	0.122807	0.0175439	210.173	29.3439	461.789	0.129649	3.32561	0	0	0	0	0	0	0	0	0	0	0	0	0	0	0	0	0	1	1	0.172414	0	0	0	1	0	0	0	0	0	0	4	0	0	0	0
C9JN71	531	0.163842	0.0960452	0.220339	0.258004	0.101695	0.039548	0.0640301	0.0564972	224.797	34.9458	445.942	-0.108701	3.58149	0	0	0	0	0	0	0	0	0	0	0	0	1	1	0	0	0	1	1	0	0	0	0	11	0	15	6	0	0	0	49	2	1	1	0
C9JNS9	249	0.345382	0.064257	0.172691	0.11245	0.11245	0.0763052	0.100402	0.0160643	207.269	35.6867	476.044	-0.0469478	3.1008	0	0	0	0	0	0	0	0	0	0	0	0	2	0	0	0	0	2	2	0.068	0	0	0	8	0	0	0	0	0	0	50	1	0	1	0
C9JPH4	75	0.24	0.0533333	0.253333	0.2	0.106667	0.0666667	0.0533333	0.0266667	220.331	29.956	456.88	-0.0976	3.4112	0	0	0	0	0	0	0	0	0	0	0	0	2	2	0	0	0	1	1	0	0	0	0	0	0	0	0	0	0	0	13	2	0	0	0
C9JPI9	133	0.278195	0.0977444	0.293233	0.105263	0.12782	0.0526316	0.0451128	0	214.076	33.6361	444.331	0.124737	3.49556	24.0602	0	0	0	32	0	0	0	1	0	0	0	1	1	0	0	0	1	1	0	0	0	0	4	0	0	0	0	0	0	0	0	2	0	0
C9JPN6	131	0.305344	0.0763359	0.274809	0.0916031	0.0763359	0.0610687	0.0610687	0.0534351	210.379	35.1687	463.168	0.143969	3.22519	0	0	0	0	0	0	0	0	0	0	0	0	0	0	0	0	0	0	0	0	0	0	0	6	0	0	0	0	0	0	0	3	0	0	0
C9JPN9	530	0.290566	0.0679245	0.235849	0.166038	0.103774	0.0509434	0.0528302	0.0320755	216.483	33.0087	455.272	0.0114151	3.39111	19.434	0	0	0	103	0	0	0	2	0	0	0	5	3	0	0	0	1	1	0.0414313	0.047081	0	0	16	0	1	0	0	0	0	68	3	1	0	0
C9JPP4	144	0.340278	0.104167	0.194444	0.145833	0.131944	0.0138889	0.0555556	0.0138889	216.971	32.9201	463.472	-0.008125	3.47083	0	0	0	0	0	0	0	0	0	0	0	0	0	0	0	0	0	0	0	0	0.213793	0	0	4	0	0	0	0	0	0	0	0	6	0	0
C9JQI7	657	0.305936	0.109589	0.200913	0.165906	0.123288	0.0380518	0.0334855	0.0228311	221.195	27.7866	453.855	0.117139	3.66592	0	0	0	0	0	0	0	0	0	0	0	0	0	0	4	0.101824	0.99696	0	0	0.0243161	0.191489	0.0957447	0	6	0	3	0	0	0	0	100	0	0	0	4
C9JQL5	133	0.37594	0.0902256	0.233083	0.12782	0.0300752	0.075188	0.0451128	0.0225564	212.281	33.2835	447.737	0.295639	3.40692	0	0	0	0	0	0	0	0	0	0	0	0	0	0	2	0.320896	0.985075	0	0	0.134328	0.171642	0	0	3	0	0	0	0	0	0	2	1	2	0	0
C9JR72	458	0.362445	0.0960699	0.150655	0.104803	0.106987	0.0611354	0.0873362	0.0305677	207.279	39.7653	486.59	-0.00766376	3.16378	0	0	0	0	0	0	0	0	0	0	0	0	0	0	0	0	0	1	1	0.0588235	0.156863	0.492375	0	22	0	2	0	0	0	0	62	0	1	0	0
C9JRB3	161	0.31677	0.0621118	0.173913	0.186335	0.118012	0.0745342	0.0621118	0.00621118	221.109	30.4845	460.18	0.0265217	3.52093	0	0	0	0	0	0	0	0	0	0	0	0	2	1	0	0	0	1	1	0.0987654	0.197531	0	0	2	0	0	0	0	0	0	39	1	0	1	0
C9JRT9	118	0.389831	0.144068	0.20339	0.0847458	0.059322	0.0254237	0.0762712	0.0169492	207.794	37.3898	489.847	0.222797	3.31102	0	0	0	0	0	0	0	0	0	0	0	0	0	0	3	0.529412	0.983193	0	0	0.268908	0.369748	0.739496	0	1	0	0	0	0	0	0	26	1	2	0	0
C9JRZ8	316	0.303797	0.117089	0.161392	0.164557	0.14557	0.0537975	0.0443038	0.00949367	218.577	29.2731	454.522	0.0414557	3.62703	0	0	0	0	0	0	0	0	0	0	0	0	0	0	0	0	0	0	0	0	0	0	0	2	2	5	1	0	2	0	66	1	0	1	0
C9JSJ3	638	0.233542	0.0517241	0.261755	0.161442	0.111285	0.0956113	0.0595611	0.0250784	214.416	33.7997	473.65	-0.0376332	3.24044	37.931	0	0	0	242	0	0	0	3	0	0	0	18	15	0	0	0	1	1	0.15493	0.431925	0.660407	0	4	0	1	0	0	0	0	125	3	1	1	0
C9JSP6	272	0.253676	0.161765	0.183824	0.161765	0.117647	0.0477941	0.0514706	0.0220588	218.424	31.0713	451.669	0.0839338	3.67471	0	0	0	0	0	0	0	0	0	0	0	0	0	0	0	0	0	1	1	0.0549451	0	0	0	6	0	0	0	0	0	0	44	0	2	0	0
C9JSR4	18	0.277778	0	0.166667	0.166667	0.166667	0	0.111111	0.111111	217.062	21.1556	414.722	-0.186111	3.26444	0	0	0	0	0	0	0	0	0	0	0	0	1	0	0	0	0	0	0	0	0	0	0	0	0	0	0	0	0	0	54	0	0	0	0
C9JTN0	74	0.337838	0.0540541	0.189189	0.108108	0.0945946	0.108108	0.108108	0	206.406	33.1635	451.203	0.154595	3.1527	0	0	0	0	0	0	0	0	0	0	0	0	0	0	0	0	0	0	0	0	0	0	0	1	0	0	0	0	0	0	0	0	0	0	0
C9JTQ0	380	0.355263	0.0289474	0.160526	0.147368	0.0894737	0.0894737	0.115789	0.0131579	207.055	46.4766	505.913	-0.108684	2.92976	52.6316	0	0	0	200	0	0	0	2	0	0	0	7	6	0	0	0	0	0	0.217848	0.711286	0.944882	0	10	0	7	0	0	0	0	46	2	0	0	0
C9JTW6	114	0.298246	0.0175439	0.298246	0.122807	0.105263	0.105263	0.0438596	0.00877193	211.371	37.2149	461.833	-0.150702	3.13	88.5965	0	0	0	101	0	0	0	2	0	0	0	3	3	0	0	0	0	0	0.13913	0.252174	0.478261	0	0	0	0	0	0	0	0	4	1	0	0	0
C9JU85	139	0.294964	0.0647482	0.194245	0.194245	0.122302	0.057554	0.0647482	0.00719424	223.919	29.9108	460.432	-0.0071223	3.57604	0	0	0	0	0	0	0	0	0	0	0	0	2	0	0	0	0	1	1	0.114286	0.228571	0	0	2	0	0	0	0	0	0	43	4	0	3	0
C9JUA4	57	0.22807	0.0175439	0.315789	0.210526	0.0877193	0.0701754	0.0526316	0.0175439	221.235	46.1456	479.018	-0.117719	3.24737	100	0	0	0	57	0	0	0	1	0	0	0	1	1	0	0	0	0	0	0	0	0	0	0	0	0	0	0	0	0	10	0	0	0	1
C9JUD2	126	0.333333	0.15873	0.142857	0.142857	0.0714286	0.0714286	0.0793651	0	213.152	39.0262	457.635	0.232857	3.63976	0	0	0	0	0	0	0	0	0	0	0	0	0	0	0	0	0	1	1	0	0.173228	0	1	0	0	0	0	0	0	0	40	3	0	0	0
C9JUK5	28	0.464286	0.0357143	0.142857	0.0714286	0	0.142857	0.107143	0.0357143	208.767	36.2679	487.821	0.720714	3.26286	0	0	0	0	0	0	0	0	0	0	0	0	0	0	0	0	0	0	0	0.655172	0.655172	0	0	0	0	0	0	0	0	0	13	2	1	0	0
C9JUM1	99	0.333333	0.0808081	0.141414	0.141414	0.141414	0.040404	0.111111	0.010101	209.256	33.8475	453.263	-0.0181818	3.2797	0	0	0	0	0	0	0	0	0	0	0	0	0	0	0	0	0	0	0	0	0	0	0	4	0	0	0	0	0	0	13	2	2	2	0
C9JUS6	153	0.352941	0.0653595	0.150327	0.130719	0.0457516	0.117647	0.0980392	0.0392157	209.745	43.8176	465.02	0.146471	3.21176	0	0	0	0	0	0	0	0	0	0	0	0	0	0	0	0	0	0	0	0.0519481	0.305195	0.850649	1	3	0	0	0	0	0	0	19	0	0	0	0
C9JVG2	144	0.236111	0.0555556	0.208333	0.159722	0.0902778	0.0833333	0.138889	0.0277778	209.386	38.7229	481.576	-0.0340972	3.09618	66.6667	0	0	0	96	0	0	0	2	0	0	0	2	2	0	0	0	1	1	0.165517	0.303448	0.393103	0	5	0	0	0	0	0	0	12	6	0	0	0
C9JVH5	163	0.282209	0.110429	0.141104	0.171779	0.147239	0.0368098	0.0797546	0.0306748	217.403	38.0117	453.356	0.0736196	3.53914	0	0	0	0	0	0	0	0	0	0	0	0	0	0	0	0	0	1	1	0	0	0	0	1	0	0	0	0	0	0	0	0	1	0	0
C9JVI0	530	0.286792	0.0679245	0.241509	0.166038	0.103774	0.0490566	0.0528302	0.0320755	216.265	33.2274	455.36	0.00854717	3.38081	20.1887	0	0	0	107	0	0	0	2	0	0	0	5	3	0	0	0	1	1	0.0414313	0.047081	0.103578	0	15	0	0	0	0	0	0	69	3	1	0	1
C9JVW0	142	0.309859	0.0492958	0.140845	0.119718	0.0492958	0.176056	0.119718	0.0352113	204.312	48.093	496.141	-0.121972	2.90549	26.0563	0	0	0	37	0	0	0	1	0	0	0	2	2	1	0.153846	0.986014	0	0	0.65035	0.937063	0.986014	0	5	0	0	0	0	0	0	27	3	2	1	0
C9JW43	863	0.332561	0.12978	0.192352	0.12051	0.107764	0.0405562	0.0521437	0.0243337	216.755	28.438	451.848	0.271599	3.62703	6.95249	0	0	0	60	0	0	0	1	0	0	0	2	1	10	0.267361	0.997685	3	2	0.0474537	0.140046	0.0763889	0	10	0	0	0	0	0	0	106	1	0	0	0
C9JW74	296	0.314189	0.121622	0.182432	0.172297	0.0675676	0.0574324	0.0743243	0.0101351	220.898	40.3412	454.446	0.197973	3.69736	0	0	0	0	0	0	0	0	0	0	0	0	0	0	1	0.0639731	0.993266	1	1	0.030303	0.0740741	0	0	7	0	0	0	0	0	0	73	0	3	0	0
C9JWF3	39	0.333333	0.179487	0.153846	0.0512821	0.025641	0.0512821	0.153846	0.0512821	197.765	33.3154	474.051	0.501026	3.17205	0	0	0	0	0	0	0	0	0	0	0	0	0	0	0	0	0	0	0	0	0	0	0	1	0	0	0	0	0	0	0	3	0	0	0
C9JWP9	234	0.32906	0.0470085	0.166667	0.136752	0.132479	0.0683761	0.111111	0.00854701	207.533	33.0517	480.581	-0.0311966	3.06504	0	0	0	0	0	0	0	0	0	0	0	0	1	1	0	0	0	2	1	0	0.131915	0.268085	0	11	0	0	0	0	0	0	32	1	1	1	0
C9JWQ4	97	0.402062	0.0721649	0.185567	0.123711	0.113402	0.0206186	0.0515464	0.0309278	216.955	26.9433	443.897	0.301031	3.51897	0	0	0	0	0	0	0	0	0	0	0	0	0	0	0	0	0	1	1	0	0	0	0	1	0	0	0	0	0	0	10	1	1	0	0
C9JX95	125	0.376	0.104	0.168	0.112	0.12	0.032	0.064	0.016	216.364	33.6081	473.565	0.132661	3.52903	0	0	0	0	0	0	0	0	0	0	0	0	0	0	1	0.18254	0.984127	1	1	0.0634921	0	0	0	5	0	0	0	0	0	0	27	1	0	1	0
C9JXR0	29	0.517241	0.0689655	0.275862	0.103448	0	0.0344828	0	0	217.421	37.5828	501.414	0.747586	3.57138	0	0	0	0	0	0	0	0	0	0	0	0	0	0	0	0	0	0	0	0.633333	0.9	0	1	0	0	0	0	0	0	0	11	3	1	0	0
C9JXX5	98	0.387755	0.0612245	0.132653	0.163265	0.0816327	0.112245	0.0612245	0	215.912	41.2163	479.143	0.123265	3.4052	0	0	0	0	0	0	0	0	0	0	0	0	0	0	0	0	0	0	0	0.282828	0.848485	0.989899	1	6	0	0	0	0	0	0	14	2	0	1	0
C9JY72	161	0.391304	0.068323	0.192547	0.0993789	0.0559006	0.0621118	0.0559006	0.0745342	210.634	34.2292	475.261	0.122671	3.16876	0	0	0	0	0	0	0	0	0	0	0	0	0	0	0	0	0	0	0	0	0.123457	0	1	4	0	0	0	0	0	0	0	0	0	0	0
C9JYG3	281	0.352313	0.0498221	0.16726	0.131673	0.131673	0.0640569	0.103203	0	207.815	32.0776	483.797	-0.0303203	3.09708	0	0	0	0	0	0	0	0	0	0	0	0	3	2	0	0	0	2	1	0	0.109929	0.223404	0	5	0	0	0	0	0	0	38	1	1	2	0
C9JYI2	115	0.382609	0.13913	0.208696	0.0956522	0.0521739	0.0434783	0.0608696	0.0173913	210.431	28.6696	461.522	0.35887	3.47826	0	0	0	0	0	0	0	0	0	0	0	0	0	0	2	0.37069	0.982759	0	0	0	0	0	0	1	0	0	0	0	0	0	21	2	2	1	0
C9JZ02	118	0.338983	0.101695	0.161017	0.127119	0.161017	0.0338983	0.0677966	0.00847458	215.229	28.1644	470.873	0.0414407	3.47254	0	0	0	0	0	0	0	0	0	0	0	0	0	0	0	0	0	0	0	0	0	0	0	1	0	0	0	0	0	0	26	1	0	1	0
C9K057	108	0.287037	0.0925926	0.203704	0.194444	0.0925926	0.0462963	0.0462963	0.037037	221.504	36.0056	436.796	-0.00898148	3.615	0	0	0	0	0	0	0	0	0	0	0	0	0	0	0	0	0	1	1	0	0	0	0	3	0	0	0	0	0	0	48	0	0	0	0
C9K0E1	17	0.235294	0	0.235294	0	0.235294	0.117647	0.117647	0.0588235	189.603	25.5	482.118	8.1634e-18	2.48059	0	0	0	0	0	0	0	0	0	0	0	0	1	1	0	0	0	0	0	0	0	0	0	0	0	0	0	0	0	0	0	0	0	0	0
C9K0F9	728	0.21978	0.0755495	0.225275	0.175824	0.163462	0.0645604	0.0480769	0.0274725	221.965	31.6158	454.576	-0.0976511	3.55146	43.2692	0	0	0	315	0	0	0	4	0	0	0	12	8	0	0	0	1	1	0.163237	0.403292	0.526749	0	9	0	0	0	0	0	0	0	2	1	0	0
C9K0P9	220	0.227273	0.0454545	0.286364	0.159091	0.154545	0.0318182	0.0954545	0	214.277	39.8832	472.418	-0.0444545	3.20409	60.4545	0	0	0	133	0	0	0	1	0	0	0	4	3	0	0	0	1	1	0.316742	0.316742	0.800905	0	1	0	0	0	0	0	0	0	1	0	0	0
C9K0R0	56	0.0892857	0.0714286	0.267857	0.125	0.125	0.0535714	0.107143	0.160714	208.506	22.7179	432.732	-0.100357	2.97554	0	0	0	0	0	0	0	0	0	0	0	0	0	0	0	0	0	1	1	0	0	0	0	4	0	0	0	0	0	0	3	1	0	0	0
D3DTV9	90	0.3	0.1	0.133333	0.211111	0.0444444	0.133333	0.0666667	0.0111111	219.734	49.5222	433.567	0.148444	3.68533	0	0	0	0	0	0	0	0	0	0	0	0	0	0	1	0.230769	0.978022	0	0	0.131868	0	0	0	6	0	0	0	0	0	0	9	1	2	0	1
D3W0D1	207	0.26087	0.144928	0.246377	0.111111	0.101449	0.0241546	0.0676329	0.0434783	215.03	28.1184	436.444	0.257246	3.61184	0	0	0	0	0	0	0	0	0	0	0	0	0	0	1	0.110577	0.990385	1	1	0	0	0	0	4	0	1	0	0	0	0	10	0	0	0	0
D6R8Y8	96	0.260417	0.0416667	0.239583	0.1875	0.0833333	0.104167	0.0729167	0.0104167	211.361	37.5146	490.688	-0.185	3.06729	100	0	0	0	96	0	0	0	1	0	0	0	3	2	0	0	0	0	0	0.154639	0.257732	0.443299	0	0	0	0	0	0	0	0	14	7	3	0	0
D6R901	530	0.290566	0.0679245	0.237736	0.164151	0.103774	0.0509434	0.0528302	0.0320755	216.249	33.0272	455.13	0.0129623	3.38579	20.1887	0	0	0	107	0	0	0	2	0	0	0	5	3	0	0	0	1	1	0.0357815	0.0903955	0	0	16	0	0	0	0	0	0	68	3	1	0	1
D6R959	154	0.246753	0.0714286	0.220779	0.168831	0.116883	0.0844156	0.0779221	0.012987	218.171	34.9325	459.383	0.038961	3.44513	0	0	0	0	0	0	0	0	0	0	0	0	4	2	0	0	0	0	0	0	0	0	0	4	0	0	0	0	0	0	0	0	0	0	0
D6R9G9	194	0.386598	0.0876289	0.170103	0.103093	0.0515464	0.0876289	0.0824742	0.0257732	210.053	31.9933	486.585	0.226736	3.27622	0	0	0	0	0	0	0	0	0	0	0	0	0	0	4	0.369231	0.989744	0	0	0.292308	0.641026	0.74359	0	3	0	0	0	0	0	0	26	3	2	1	0
D6R9N7	530	0.286792	0.0679245	0.239623	0.167925	0.103774	0.0490566	0.0528302	0.0320755	216.444	33.1689	455.521	0.00571698	3.38491	19.434	0	0	0	103	0	0	0	2	0	0	0	5	3	0	0	0	1	1	0.0414313	0.047081	0.103578	0	16	0	0	0	0	0	0	66	3	1	0	1
D6R9V5	70	0.471429	0.0428571	0.157143	0.128571	0.0714286	0.0285714	0.0714286	0.0285714	214.392	35.27	488.314	0.221857	3.26171	0	0	0	0	0	0	0	0	0	0	0	0	0	0	0	0	0	0	0	0	0	0	1	1	0	0	0	0	0	0	0	0	1	0	0
D6RA61	530	0.286792	0.0679245	0.239623	0.167925	0.103774	0.0490566	0.0528302	0.0320755	216.496	33.2134	455.362	0.00364151	3.38679	19.434	0	0	0	103	0	0	0	2	0	0	0	5	3	0	0	0	1	1	0.0414313	0.047081	0.103578	0	15	0	0	0	0	0	0	69	3	1	0	1
D6RA91	191	0.272251	0.0994764	0.198953	0.17801	0.120419	0.0575916	0.0471204	0.026178	220.862	29.3194	452.743	0.098534	3.64147	0	0	0	0	0	0	0	0	0	0	0	0	0	0	0	0	0	0	0	0	0.114583	0	0	3	0	0	0	0	0	0	24	4	0	0	1
D6RAR5	112	0.223214	0.0803571	0.214286	0.232143	0.151786	0.0535714	0.0267857	0.0178571	229.855	32.1545	438.795	-0.109375	3.79518	41.9643	0	0	0	47	0	0	0	1	0	0	0	3	1	0	0	0	1	1	0	0	0	0	0	0	0	0	0	0	0	16	0	0	0	0
D6RAT5	78	0.25641	0.0769231	0.217949	0.0897436	0.115385	0.0384615	0.153846	0.0512821	206.778	31.3051	468.885	0.0170513	3.10833	0	0	0	0	0	0	0	0	0	0	0	0	0	0	0	0	0	0	0	0	0	0	0	5	0	0	0	0	0	0	5	0	1	1	0
D6RAV2	85	0.317647	0.0705882	0.0823529	0.176471	0.117647	0.0588235	0.152941	0.0235294	212.631	42.7518	494.871	-0.183765	3.19224	0	0	0	0	0	0	0	0	0	0	0	0	0	0	0	0	0	0	0	0	0.651163	0.651163	0	2	0	0	0	0	0	0	62	1	0	0	0
D6RB22	116	0.327586	0.0431034	0.198276	0.163793	0.103448	0.0689655	0.0603448	0.0344828	218	33.3483	474.233	0.0455172	3.34284	0	0	0	0	0	0	0	0	0	0	0	0	1	1	0	0	0	0	0	0	0.307692	0.42735	1	2	0	0	0	0	0	0	70	0	3	0	0
D6RB86	61	0.245902	0.0819672	0.229508	0.180328	0.196721	0	0.0491803	0.0163934	221.102	29.1033	464.918	-0.0278689	3.56311	0	0	0	0	0	0	0	0	0	0	0	0	1	1	0	0	0	0	0	0.193548	0	0	0	0	0	0	0	0	0	0	0	0	0	0	0
D6RBL9	68	0.455882	0.0294118	0.132353	0.176471	0.0147059	0.0882353	0.0882353	0.0147059	211.136	52.575	513.912	0.0258824	3.03382	0	0	0	0	0	0	0	0	0	0	0	0	0	0	0	0	0	0	0	0.217391	0.956522	0.956522	0	3	0	0	0	0	0	0	0	0	1	0	0
D6RBM5	183	0.306011	0.0601093	0.218579	0.153005	0.0983607	0.0655738	0.0546448	0.0437158	212.883	35.1454	452.284	0.0417486	3.2776	0	0	0	0	0	0	0	0	0	0	0	0	0	0	0	0	0	1	1	0	0	0.298913	0	12	0	0	0	0	0	0	18	0	0	0	0
D6RBP2	19	0.473684	0.105263	0.105263	0.105263	0	0.0526316	0.105263	0.0526316	211.621	27.4789	439.895	0.766842	3.52632	0	0	0	0	0	0	0	0	0	0	0	0	0	0	0	0	0	0	0	0	0	0	0	0	0	0	0	0	0	0	10	0	0	0	0
D6RBQ6	530	0.288679	0.0679245	0.239623	0.166038	0.103774	0.0490566	0.0528302	0.0320755	216.224	33.2408	455.394	0.00358491	3.38034	19.434	0	0	0	103	0	0	0	2	0	0	0	5	3	0	0	0	1	1	0.0357815	0.0903955	0.103578	0	16	0	0	0	0	0	0	69	3	1	0	1
D6RBW5	176	0.244318	0.113636	0.295455	0.125	0.0965909	0.0852273	0.00568182	0.0340909	218.395	29.1727	417.108	0.240341	3.71563	0	0	0	0	0	0	0	0	0	0	0	0	0	0	0	0	0	1	1	0.0677966	0.225989	0.418079	0	7	0	0	0	0	0	0	0	2	0	0	0
D6RBY1	212	0.382075	0.103774	0.183962	0.0707547	0.0943396	0.0377358	0.0943396	0.0330189	208.96	32.9825	468.632	0.294717	3.3583	0	0	0	0	0	0	0	0	0	0	0	0	0	0	4	0.431925	0.99061	0	0	0.29108	0.57277	0.492958	0	1	0	0	0	0	0	0	0	0	0	0	0
D6RBZ9	129	0.263566	0.124031	0.178295	0.147287	0.131783	0.0852713	0.0542636	0.0155039	215.363	29.3977	438.713	0.0675194	3.60233	0	0	0	0	0	0	0	0	0	0	0	0	0	0	0	0	0	0	0	0	0	0	0	8	0	0	0	0	0	0	0	2	0	0	0
D6RCA3	176	0.267045	0.0625	0.181818	0.164773	0.176136	0.0568182	0.0568182	0.0340909	216.457	31.8915	436.955	-0.0945455	3.44693	35.7955	0	0	0	63	0	0	0	1	0	0	0	2	2	0	0	0	0	0	0	0	0	0	4	0	0	0	0	0	0	24	4	1	0	2
D6RCP7	530	0.286792	0.0679245	0.239623	0.167925	0.103774	0.0490566	0.0528302	0.0320755	216.493	33.2342	455.747	0.00660377	3.38613	19.434	0	0	0	103	0	0	0	2	0	0	0	5	3	0	0	0	1	1	0.0414313	0.047081	0.103578	0	13	0	0	0	0	0	0	69	3	1	0	1
D6RDY6	357	0.35014	0.0392157	0.246499	0.142857	0.123249	0.0364146	0.0420168	0.0168067	216.819	27.2287	474.126	0.0317135	3.31761	0	0	0	0	0	0	0	0	0	0	0	0	2	0	0	0	0	1	1	0	0	0	0	10	0	0	0	0	0	0	38	1	0	0	0
D6RDY9	157	0.350318	0.101911	0.216561	0.0764331	0.0382166	0.11465	0.0764331	0.0254777	207.489	36.5987	473.49	0.222611	3.26592	0	0	0	0	0	0	0	0	0	0	0	0	0	0	2	0.272152	0.987342	0	0	0.196203	0.373418	0.373418	0	3	0	0	0	0	0	0	17	1	0	0	0
D6REC4	459	0.305011	0.0392157	0.189542	0.20915	0.130719	0.0413943	0.0762527	0.0087146	225.029	42.054	477.856	-0.24634	3.48174	8.27887	20.6972	0	0	38	95	0	0	1	3	0	0	9	4	0	0	0	0	0	0.269565	0.623913	0.9	0	2	0	0	0	0	0	0	45	0	0	0	2
D6REX4	122	0.237705	0.0737705	0.270492	0.163934	0.106557	0.0655738	0.0737705	0.00819672	219.229	37.0779	456.975	0.0472131	3.49352	24.5902	0	0	0	30	0	0	0	1	0	0	0	5	2	0	0	0	0	0	0	0	0	0	0	0	0	0	0	0	0	0	2	2	0	0
D6RF30	607	0.270181	0.0329489	0.2257	0.200988	0.151565	0.0527183	0.0527183	0.0131796	221.519	32.6753	467.929	-0.166063	3.42074	45.6343	18.6161	0	0	277	113	0	0	5	4	0	0	13	9	0	0	0	0	0	0.185855	0.445724	0.835526	0	1	0	4	0	0	0	0	54	0	0	0	0
D6RGH6	385	0.283117	0.0519481	0.215584	0.12987	0.12987	0.0961039	0.0649351	0.0285714	210.42	36.8566	475.821	-0.0357143	3.13392	26.4935	21.039	0	0	102	81	0	0	3	2	0	0	7	3	0	0	0	0	0	0.0777202	0.388601	0.303109	0	11	1	3	0	0	0	0	54	2	3	0	1
D6RGK9	163	0.361963	0.0613497	0.220859	0.141104	0.104294	0.0613497	0.0490798	0	219.523	30.4963	470.46	0.305767	3.53466	0	0	0	0	0	0	0	0	0	0	0	0	0	0	0	0	0	0	0	0.189024	0.432927	0.786585	0	2	0	0	0	0	0	0	30	0	1	0	0
D6RGX4	464	0.258621	0.0301724	0.221983	0.168103	0.0905172	0.142241	0.0668103	0.0215517	211.72	38.8459	476.192	-0.119052	3.11082	91.1638	0	0	0	423	0	0	0	4	0	0	0	14	11	0	0	0	0	0	0.103226	0.288172	0.71828	0	0	1	2	0	0	0	0	66	6	0	0	0
D6RHG0	285	0.37193	0.0912281	0.189474	0.115789	0.0491228	0.077193	0.0736842	0.0315789	212.724	33.394	473.73	0.230877	3.35814	0	0	0	0	0	0	0	0	0	0	0	0	0	0	4	0.283217	0.993007	0	0	0.199301	0.465035	0.534965	0	5	0	0	0	0	0	0	38	2	1	0	0
D6RIA3	1793	0.267708	0.0435025	0.272727	0.133296	0.104294	0.0864473	0.0819855	0.010039	207.837	36.7965	492.869	-0.085449	2.99497	54.2666	1.17122	0	0	973	21	0	0	9	1	0	0	42	34	0	0	0	0	0	0.16165	0.444259	0.721293	0	20	0	18	1	0	0	0	247	3	1	0	0
D6RIW9	46	0.304348	0.0652174	0.108696	0.173913	0.173913	0.0869565	0.0652174	0.0217391	216.976	31.0413	447.065	-0.0380435	3.46391	0	0	0	0	0	0	0	0	0	0	0	0	1	0	0	0	0	0	0	0	0	0	0	0	0	0	0	0	0	0	9	3	1	1	0
D6RJB6	530	0.286792	0.0679245	0.239623	0.166038	0.103774	0.0509434	0.0528302	0.0320755	216.217	33.2515	455.126	0.00720755	3.38104	20.1887	0	0	0	107	0	0	0	2	0	0	0	5	3	0	0	0	1	1	0.0414313	0.047081	0.103578	0	17	0	0	0	0	0	0	69	3	1	0	1
D6RJE6	181	0.309392	0.0718232	0.176796	0.18232	0.104972	0.0552486	0.0662983	0.0331492	221.341	33.7646	465.039	0.0186188	3.51392	0	0	0	0	0	0	0	0	0	0	0	0	0	0	0	0	0	0	0	0	0.197802	0.274725	1	4	0	0	0	0	0	0	43	1	0	0	0
E0CX11	47	0.382979	0.0851064	0.148936	0.148936	0.106383	0.0638298	0.0638298	0	216.229	20.6553	487.957	0.188511	3.44638	0	0	0	0	0	0	0	0	0	0	0	0	0	0	0	0	0	0	0	0	0.333333	0	1	0	0	0	0	0	0	0	3	1	0	0	1
E2RYF6	1773	0.203046	0.0214326	0.534687	0.0253807	0.106035	0.0129724	0.0941906	0.00225606	192.849	34.4461	523.395	0.155465	2.41056	86.8584	0	0	0	1540	0	0	0	4	0	0	0	39	26	1	0.0135287	0.998873	0	0	0.790868	0.960541	0.970688	1	7	0	36	0	0	0	0	16	0	0	1	0
E2RYF7	251	0.211155	0.0278884	0.282869	0.111554	0.187251	0.0796813	0.0956175	0.00398406	204.251	34.504	490.43	-0.15247	2.84797	84.0637	0	0	0	211	0	0	0	1	0	0	0	7	5	0	0	0	0	0	0.031746	0.630952	0.706349	1	0	0	0	0	0	0	0	36	0	0	0	0
E5RFJ8	211	0.303318	0.0758294	0.236967	0.0947867	0.137441	0.0805687	0.0616114	0.00947867	211.077	32.5976	459.237	0.000521327	3.29953	17.5355	0	0	0	37	0	0	0	1	0	0	0	1	1	0	0	0	1	1	0	0.132075	0	0	0	0	0	0	0	0	0	0	1	0	0	0
E5RFL4	88	0.375	0.0795455	0.204545	0.0909091	0.113636	0.0454545	0.0681818	0.0227273	204.736	25.4398	478.182	0.0461364	3.08193	0	0	0	0	0	0	0	0	0	0	0	0	0	0	0	0	0	1	1	0	0	0	0	1	0	0	0	0	0	0	16	2	1	1	0
E5RFY8	132	0.340909	0.0606061	0.234848	0.136364	0.0909091	0.0151515	0.106061	0.0151515	213.588	39.4568	495.848	0.0897727	3.20045	0	0	0	0	0	0	0	0	0	0	0	0	0	0	0	0	0	1	1	0	0	0	0	5	0	0	0	0	0	0	0	3	0	0	0
E5RG02	174	0.316092	0.0862069	0.235632	0.126437	0.0517241	0.0632184	0.0804598	0.0402299	213.137	34.3822	457.195	0.190287	3.37316	0	0	0	0	0	0	0	0	0	0	0	0	0	0	0	0	0	1	1	0	0	0	0	9	0	0	0	0	0	0	19	2	2	0	0
E5RG31	278	0.31295	0.0719424	0.21223	0.161871	0.122302	0.0539568	0.057554	0.00719424	219.69	31.764	460.058	0.0303957	3.49932	0	0	0	0	0	0	0	0	0	0	0	0	1	0	0	0	0	1	1	0	0	0	0	8	0	0	0	0	0	0	77	3	0	0	0
E5RGE9	24	0.25	0.125	0.333333	0.0833333	0.166667	0	0.0416667	0	209.31	27.4583	459.708	0.0375	3.38375	0	0	0	0	0	0	0	0	0	0	0	0	0	0	0	0	0	0	0	0	0	0	0	0	0	0	0	0	0	0	0	5	1	1	0
E5RH22	61	0.327869	0.0819672	0.0983607	0.114754	0.147541	0.147541	0.0655738	0.0163934	215.528	31.0197	475.082	0.214098	3.48393	0	0	0	0	0	0	0	0	0	0	0	0	1	0	0	0	0	0	0	0.290323	0.677419	0.887097	1	1	0	0	0	0	0	0	12	0	2	0	0
E5RH28	148	0.195946	0.108108	0.195946	0.128378	0.0743243	0.148649	0.135135	0.0135135	204.684	38.0493	457.797	-0.0233784	3.15831	61.4865	0	0	0	91	0	0	0	1	0	0	0	3	3	1	0.14094	0.986577	0	0	0.416107	0.630872	0.630872	1	0	0	0	0	0	0	0	25	3	1	1	0
E5RHB7	118	0.322034	0.0677966	0.262712	0.127119	0.0508475	0.0508475	0.101695	0.0169492	213.165	37.6814	494.161	0.176017	3.22797	0	0	0	0	0	0	0	0	0	0	0	0	0	0	0	0	0	1	1	0	0.285714	0	0	7	0	0	0	0	0	0	0	0	0	0	0
E5RHQ5	1161	0.259259	0.0318691	0.224806	0.182601	0.0904393	0.166236	0.0301464	0.0146425	217.225	38.6614	448.988	0.0312748	3.36035	53.3161	0	0	0	619	0	0	0	3	0	0	0	17	11	1	0.0215146	0.998279	0	0	0.166093	0.253012	0.842513	0	7	0	3	0	0	0	0	232	3	0	0	1
E5RHZ7	41	0.341463	0.0731707	0.195122	0.170732	0.170732	0.0243902	0.0243902	0	219.585	34.8024	449.61	0.191951	3.60463	0	0	0	0	0	0	0	0	0	0	0	0	0	0	0	0	0	0	0	0	0	0	0	0	0	0	0	0	0	0	20	4	0	0	0
E5RI06	144	0.3125	0.0902778	0.201389	0.138889	0.0972222	0.0555556	0.0972222	0.00694444	207.66	34.9208	469.5	0.107917	3.20354	0	0	0	0	0	0	0	0	0	0	0	0	0	0	0	0	0	1	1	0	0	0	0	1	0	0	0	0	0	0	0	2	0	1	0
E5RI26	94	0.329787	0.0744681	0.148936	0.191489	0.12766	0.0106383	0.106383	0.0106383	217.016	38.9117	474.83	-0.0638298	3.37032	0	0	0	0	0	0	0	0	0	0	0	0	0	0	0	0	0	1	1	0	0	0	0	3	0	0	0	0	0	0	11	1	0	1	0
E5RI56	91	0.318681	0.032967	0.208791	0.10989	0.230769	0.043956	0.032967	0.021978	216.344	18.6451	461.055	-0.0565934	3.36209	0	0	0	0	0	0	0	0	0	0	0	0	1	0	0	0	0	1	1	0.152174	0	0	0	0	0	0	0	0	0	0	9	1	1	0	0
E5RI59	121	0.363636	0.0661157	0.22314	0.0991736	0.0578512	0.0495868	0.107438	0.0330579	211.693	28.3488	482.066	0.283223	3.27909	0	17.3554	0	0	0	21	0	0	0	1	0	0	0	0	0	0	0	0	0	0.122951	0.47541	0	0	6	0	0	0	0	0	0	26	1	0	0	0
E5RI93	101	0.217822	0.029703	0.306931	0.108911	0.178218	0.0693069	0.039604	0.049505	210.274	26.5752	460.198	-0.0984158	3.07475	69.3069	0	0	0	70	0	0	0	1	0	0	0	4	3	0	0	0	0	0	0	0	0	0	0	0	0	0	0	0	0	195	0	0	0	0
E5RIL1	263	0.346008	0.0646388	0.281369	0.0912548	0.0608365	0.0722433	0.0684411	0.0152091	209.155	36.2624	481.479	0.167795	3.16186	0	0	0	0	0	0	0	0	0	0	0	0	1	0	1	0.106061	0.992424	0	0	0.151515	0.272727	0.340909	1	13	0	0	2	0	0	0	22	1	2	0	0
E5RJ46	101	0.267327	0.039604	0.267327	0.227723	0.0792079	0.0594059	0.049505	0.00990099	221.965	44.3317	463.525	-0.0653465	3.42762	40.5941	0	0	0	41	0	0	0	1	0	0	0	3	2	0	0	0	0	0	0	0.313725	0	0	0	0	0	0	0	0	0	14	0	0	0	0
E5RJ79	112	0.3125	0.0446429	0.258929	0.151786	0.160714	0.0357143	0.0267857	0.00892857	221.122	25.5518	454.411	0.0530357	3.52366	0	0	0	0	0	0	0	0	0	0	0	0	3	1	0	0	0	1	1	0	0.265487	0	0	2	0	0	0	0	0	0	0	1	0	0	0
E5RJM6	399	0.403509	0.0250627	0.117794	0.145363	0.120301	0.047619	0.135338	0.00501253	205.643	45.2336	514.586	-0.109148	2.91283	9.02256	0	0	0	36	0	0	0	1	0	0	0	7	2	0	0	0	0	0	0.3575	0.665	0.965	0	16	0	0	0	0	0	0	27	3	1	0	0
E5RJQ4	531	0.280603	0.0621469	0.207156	0.118644	0.116761	0.114878	0.0847458	0.0150659	207.819	40.6878	476.808	-0.0363653	3.14281	39.3597	0	0	0	209	0	0	0	3	0	0	0	13	7	0	0	0	0	0	0.0902256	0.283835	0.738722	0	18	0	0	0	0	0	0	73	3	1	0	0
E5RQL4	147	0.333333	0.102041	0.183673	0.14966	0.0952381	0.0340136	0.0748299	0.0272109	214.156	36.6048	485.551	0.0585714	3.34204	0	0	0	0	0	0	0	0	0	0	0	0	0	0	0	0	0	0	0	0.0675676	0	0	0	1	0	0	0	0	0	0	24	3	1	0	3
E7EMI5	131	0.259542	0.0610687	0.290076	0.19084	0.0763359	0.0687023	0.0458015	0.00763359	217.909	35.4855	442.13	-0.0309924	3.42847	24.4275	0	0	0	32	0	0	0	1	0	0	0	4	4	0	0	0	0	0	0	0	0	0	0	0	0	0	0	0	0	27	2	1	1	0
E7EML9	344	0.311047	0.0697674	0.212209	0.119186	0.0784884	0.0668605	0.110465	0.0319767	208.126	36.3358	477.419	0.0277907	3.12808	9.01163	0	0	0	31	0	0	0	1	0	0	0	3	3	0	0	0	1	1	0.127536	0.255072	0.298551	1	10	0	0	0	0	0	0	42	5	1	1	0
E7ENQ6	273	0.3663	0.0659341	0.142857	0.117216	0.106227	0.0915751	0.0915751	0.018315	212.763	35.3125	471.67	0.115201	3.32549	0	7.69231	0	0	0	21	0	0	0	1	0	0	0	0	1	0.0766423	0.992701	1	1	0.0437956	0.156934	0.156934	0	7	0	0	0	0	0	0	39	1	0	0	0
E7ENX8	843	0.359431	0.0865955	0.201661	0.107948	0.088968	0.0510083	0.088968	0.0154211	211.326	36.1563	478.639	0.141756	3.31795	0	0	0	0	0	0	0	0	0	0	0	0	1	0	9	0.221564	0.99763	3	3	0.138626	0.303318	0.197867	0	32	0	0	0	0	0	0	115	5	1	0	0
E7EQ34	232	0.288793	0.0431034	0.280172	0.181034	0.137931	0.0301724	0.0344828	0.00431034	223.724	33.8453	446.53	0.0441379	3.56095	9.05172	10.3448	0	0	21	24	0	0	1	1	0	0	2	2	0	0	0	0	0	0.124464	0.171674	0.369099	0	1	0	0	0	0	0	0	17	4	0	0	0
E7EQL1	145	0.317241	0.0413793	0.165517	0.144828	0.110345	0.0551724	0.137931	0.0275862	206.58	44.869	490.959	-0.182621	2.95593	30.3448	0	0	0	44	0	0	0	1	0	0	0	4	2	0	0	0	1	1	0	0.219178	0	0	6	0	0	0	0	0	0	14	2	1	1	0
E7ERA2	59	0.271186	0.118644	0.152542	0.288136	0.0508475	0.0508475	0.0508475	0.0169492	236.669	44.2034	443.847	-0.104915	4.04153	0	0	0	0	0	0	0	0	0	0	0	0	0	0	0	0	0	0	0	0	0	0	0	1	0	0	0	0	0	0	6	0	0	0	0
E7ERA6	249	0.301205	0.0481928	0.180723	0.128514	0.060241	0.15261	0.064257	0.064257	209.839	42.3731	466.932	-0.0236546	3.10482	16.4659	0	0	0	41	0	0	0	1	0	0	0	1	1	1	0.068	0.992	0	0	0.324	0.684	0.82	0	6	0	2	0	0	0	0	52	2	2	0	0
E7ESA3	106	0.311321	0.0754717	0.169811	0.141509	0.160377	0.0566038	0.0754717	0.00943396	214.781	29.9849	465.717	-0.104906	3.38368	0	0	0	0	0	0	0	0	0	0	0	0	2	0	0	0	0	0	0	0	0	0	0	3	0	0	0	0	0	0	17	0	0	0	0
[truncated: 19,858 more rows]
[truncated: 8 more columns]

## Sheet: Table S2 statistics
		Length	Hydrophobic	Aromatic	Polar	Positively charged	Negatively charged	Rigid	Flexible	Covalently Interacting	AAIndex: HUTJ700103	AAIndex: KHAG800101	AAIndex: JUNJ780101	AAIndex: NAKH900104	AAIndex: FAUJ880103	Number of Intrinsically Disordered residues (%)	Number of coiled coil residues (%)	Number of collagen residues (%)	Number of single alpha helice residues (%)	Number of Intrinsically Disordered residues	Number of coiled coil residues	Number of collagen residues	Number of single alpha helice residues	Number of Intrinsically Disordered regions (>10 residues)	Number of coiled coils (>10 residues)	Number of collagens (>10 residues)	Number of single alpha helices (>10 residues)	Number of binding regions	Number of binding regions (>10 residue)	Number of transmembrane helices	Transmembrane residues (%)	Cytosolic residues in transmembrane proteins (%)	Number of domains	Number of unique domains	Low complexity regions - window: 12	Low complexity regions - window: 25	Low complexity regions - window: 45	Signal peptide	Linker regions	Number of interactions	Phosphorylation	Ubiquitination	Methylation	Acetylation	Elm instances	Predicted Serine Phosphorylation	Predicted Threonin Phosphorylation	Predicted Tyrosine Phosphorylation	Number of isoforms
[truncated: 30 more rows]
[truncated: 2 more columns]

[truncated: 5 more sheets: Table S3 Significance - feature, Table S4 - Feature 2, Table S5 Significance - Coocc., Table S6 Significance - Venn, Table S7 train, test sets]
